# Supplementary material
Source: PubMed Central journal article supplement (PMC5724186)

mbrain\_NG #18331 RT: 47.29 AV: 1 NL: 8.00E4

T: FTMS + p NSI d Full ms2 1370.6968@hcd15.(

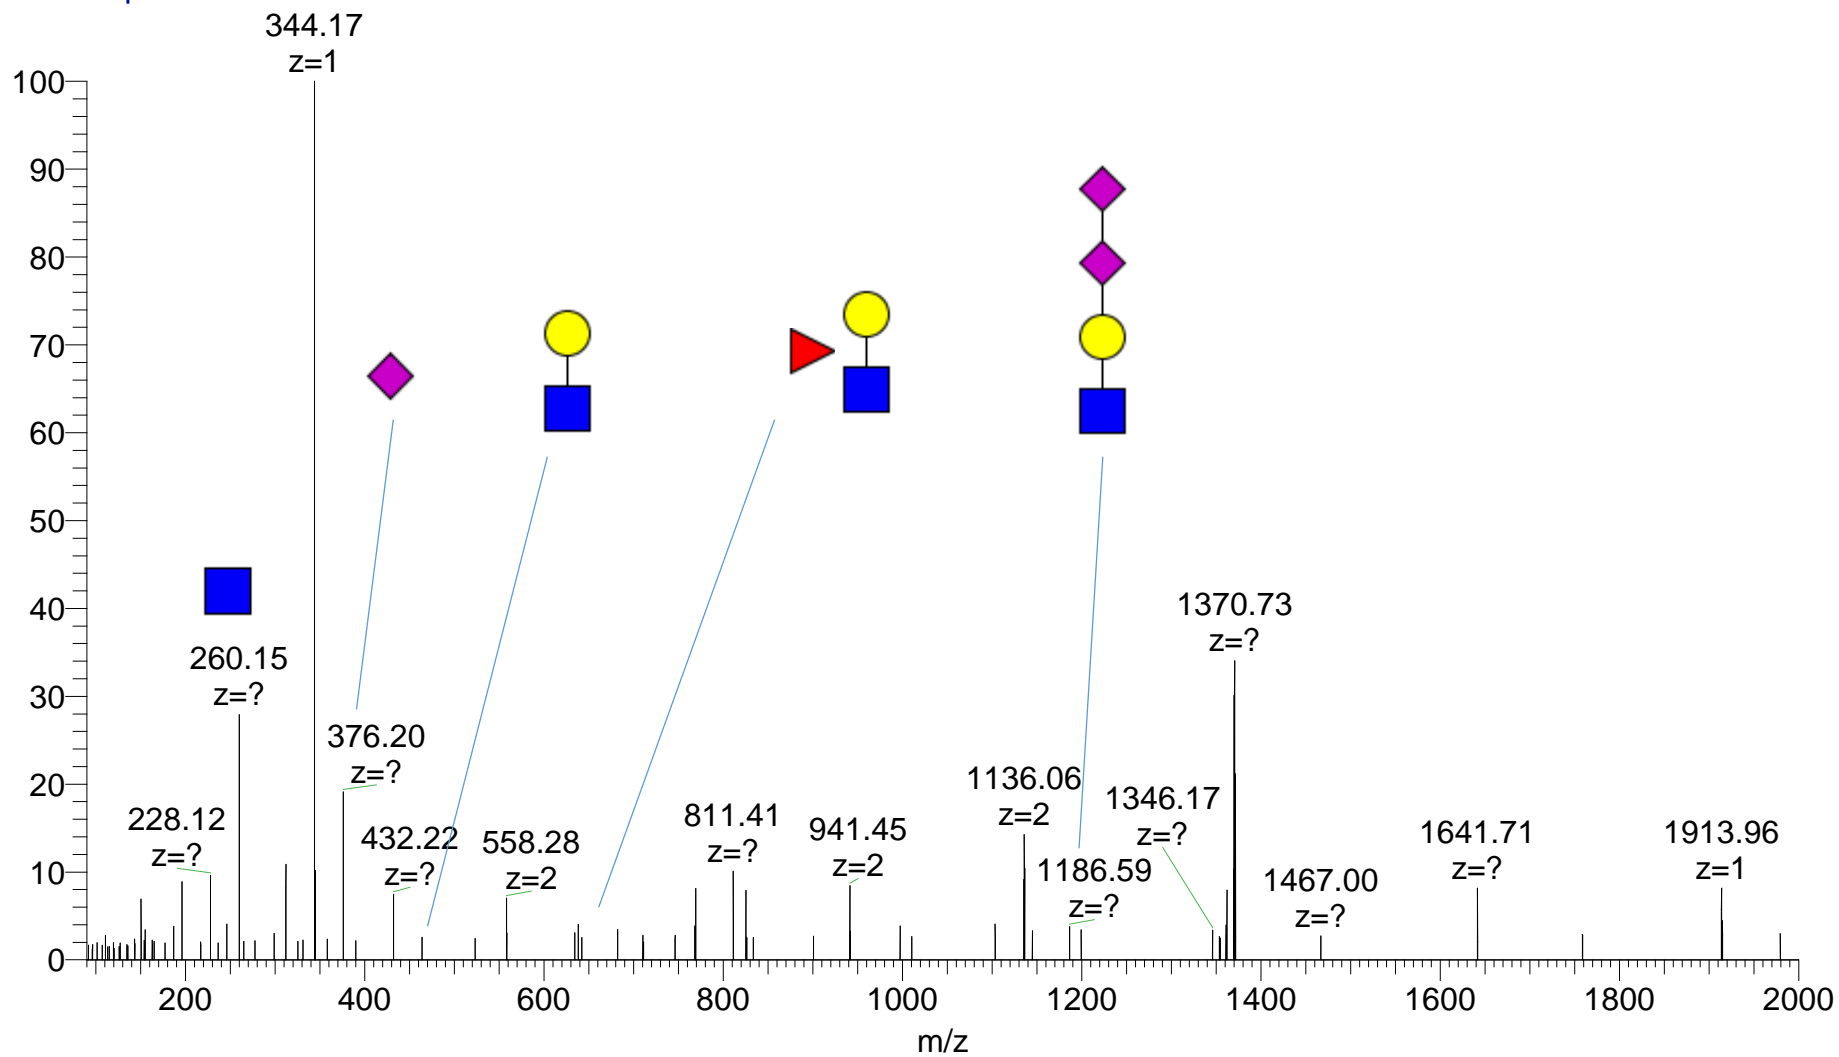

mbrain\_NG #19290 RT: 48.66 AV: 1 NL: 8.46E4  
T: FTMS + p NSI d Full ms2 1493.7689@hcd15.(

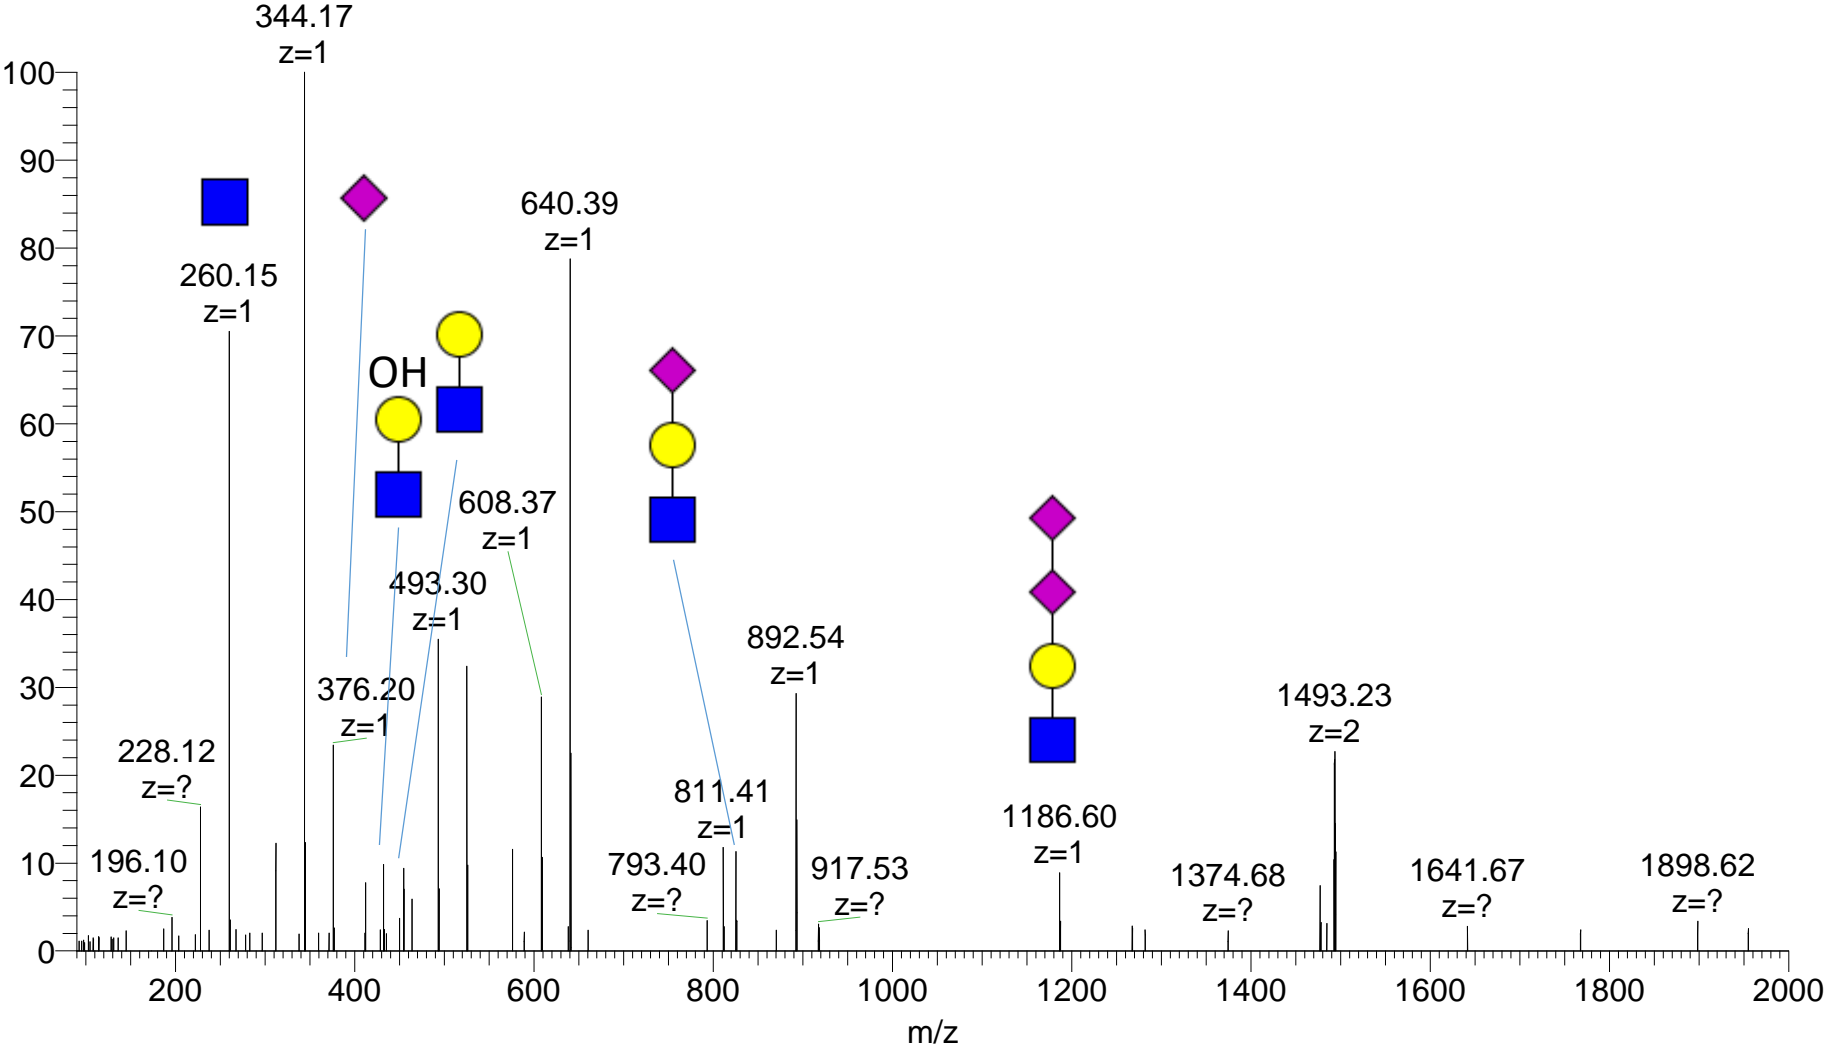

mbrain\_NG #19502 RT: 48.95 AV: 1 NL: 1.29E5  
T: FTMS + p NSI d Full ms2 1473.7572@hcd15.(

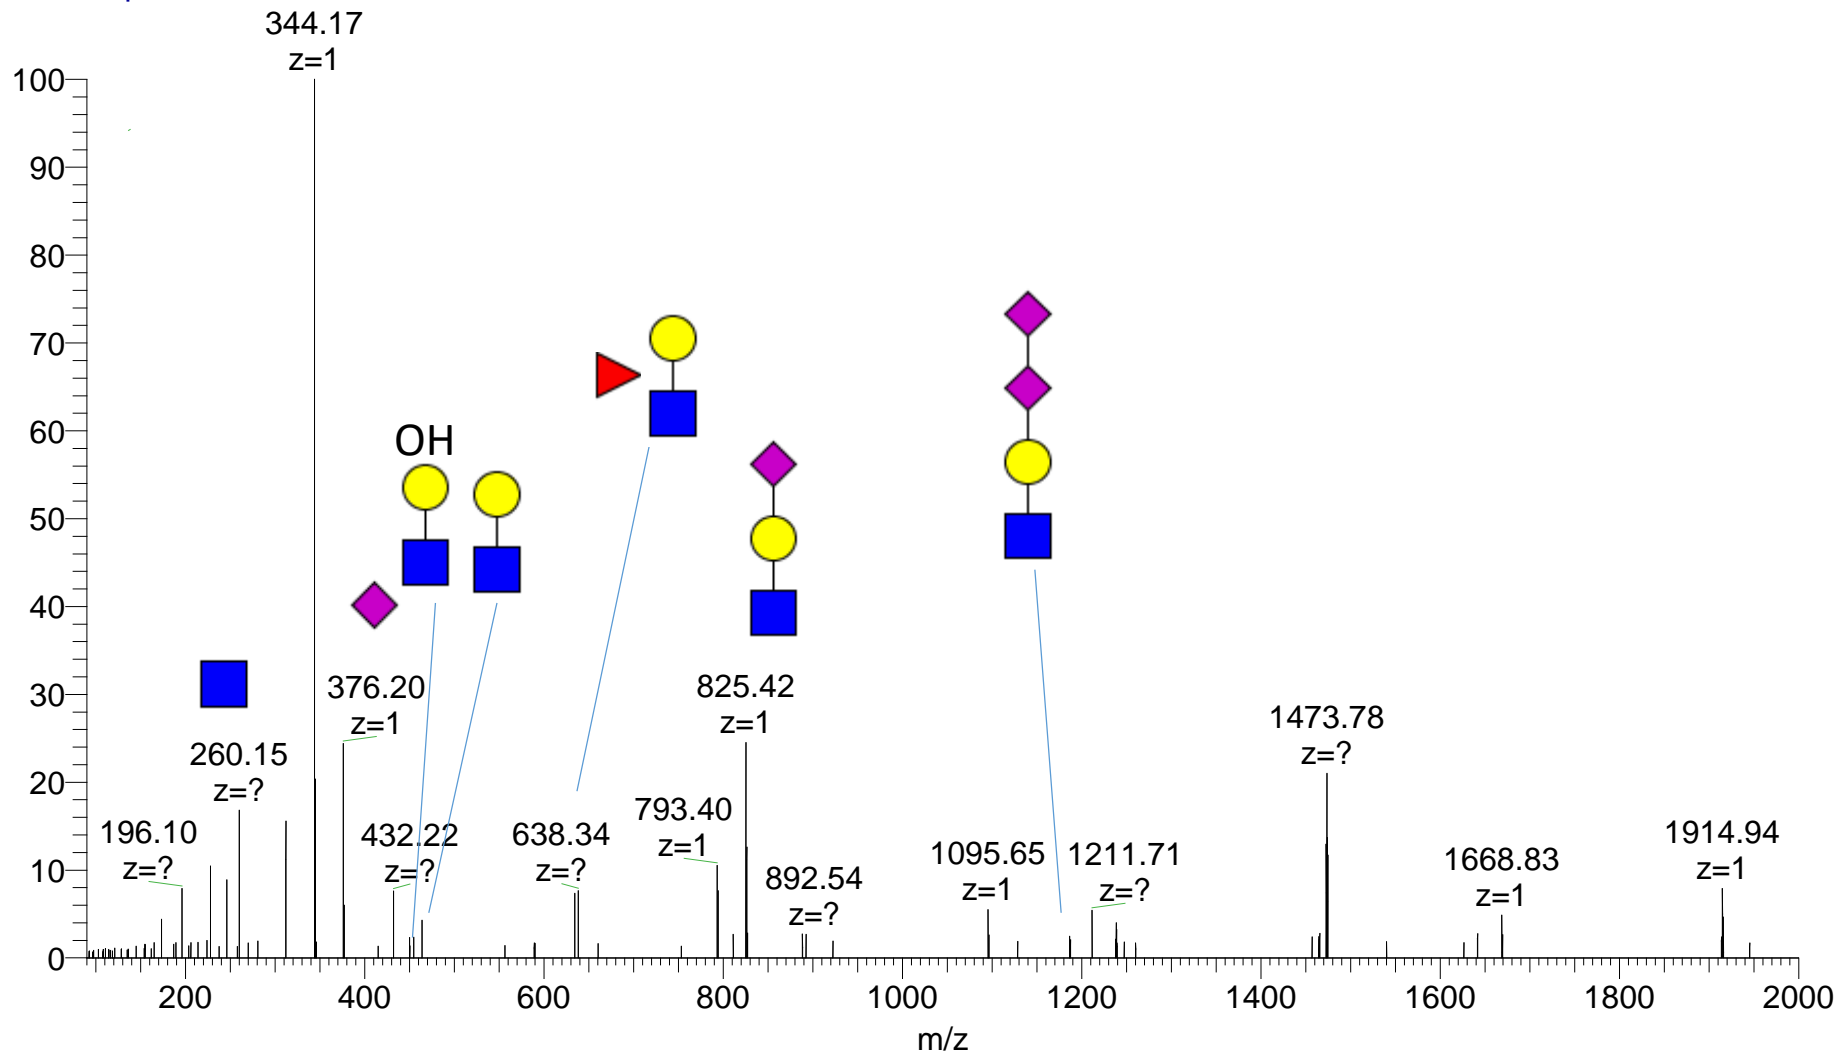

mbrain\_NG #19932 RT: 49.54 AV: 1 NL: 6.04E5  
T: FTMS + p NSI d Full ms2 1077.8907@hcd15.(

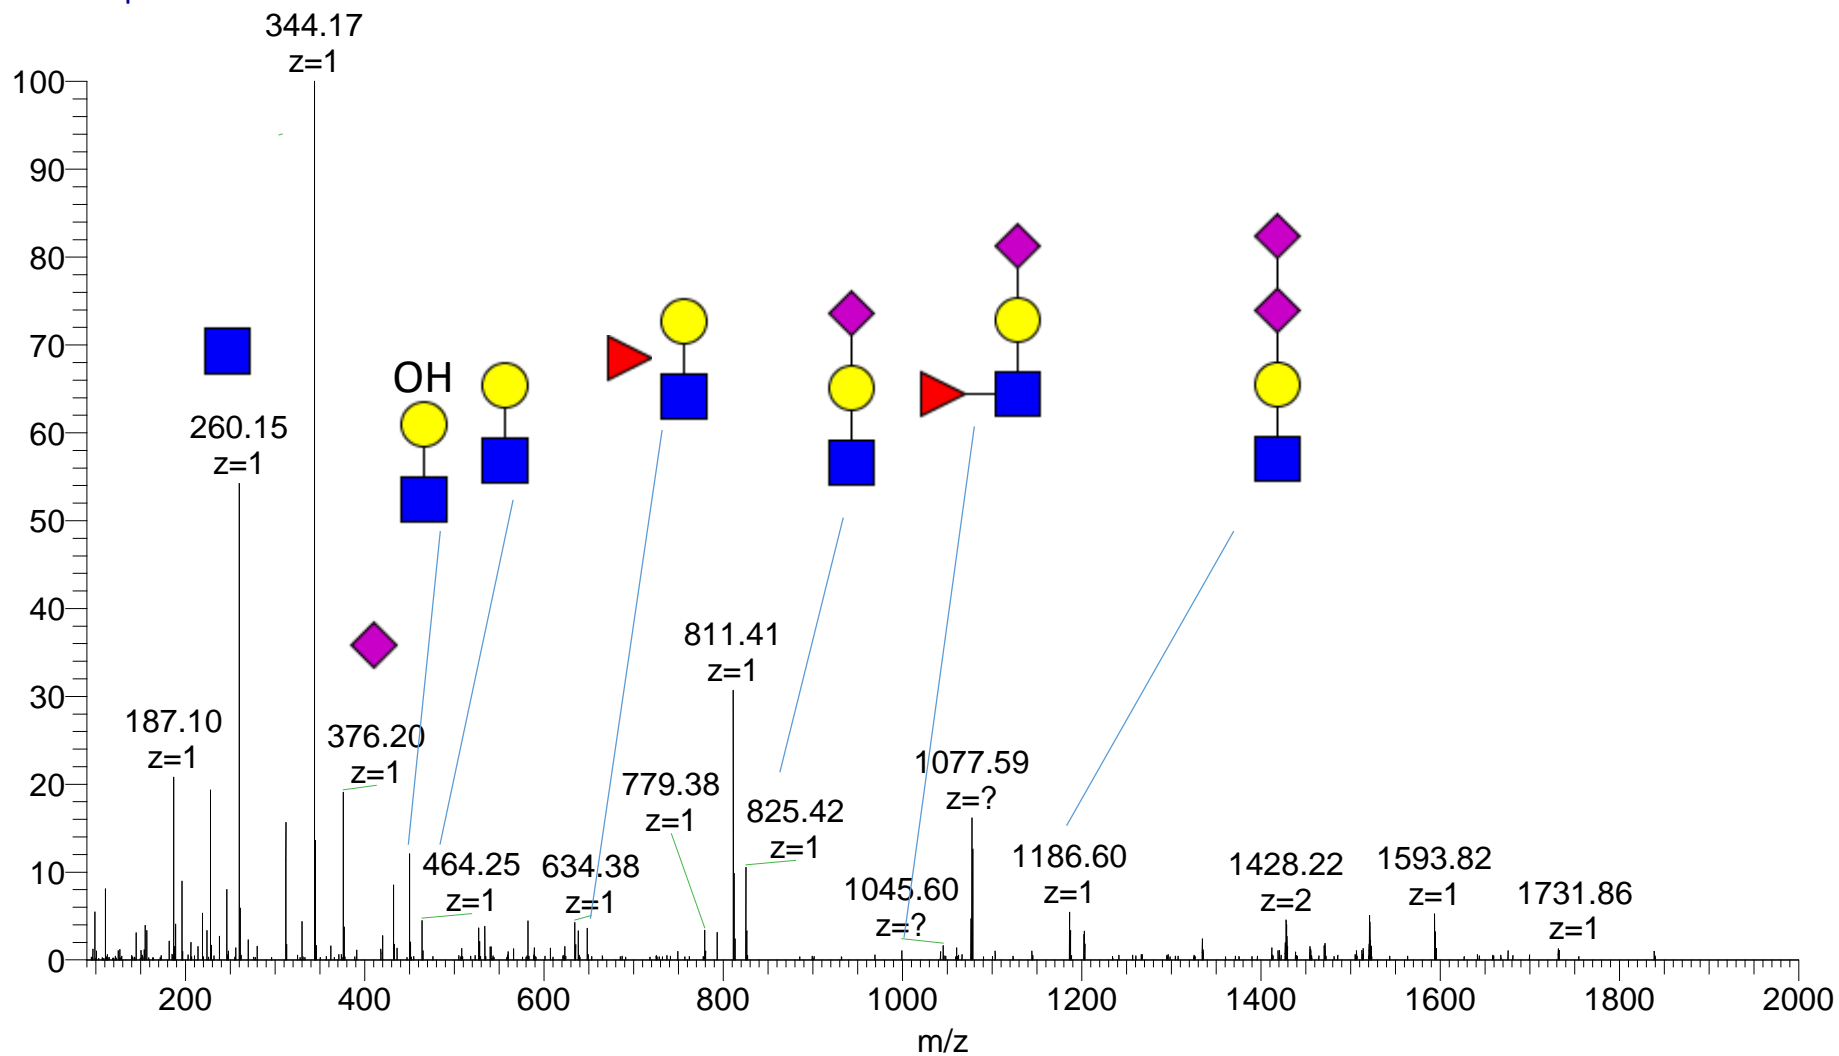

mbrain\_NG #19989 RT: 49.61 AV: 1 NL: 9.58E4  
T: FTMS + p NSI d Full ms2 1653.8429@hcd15.(

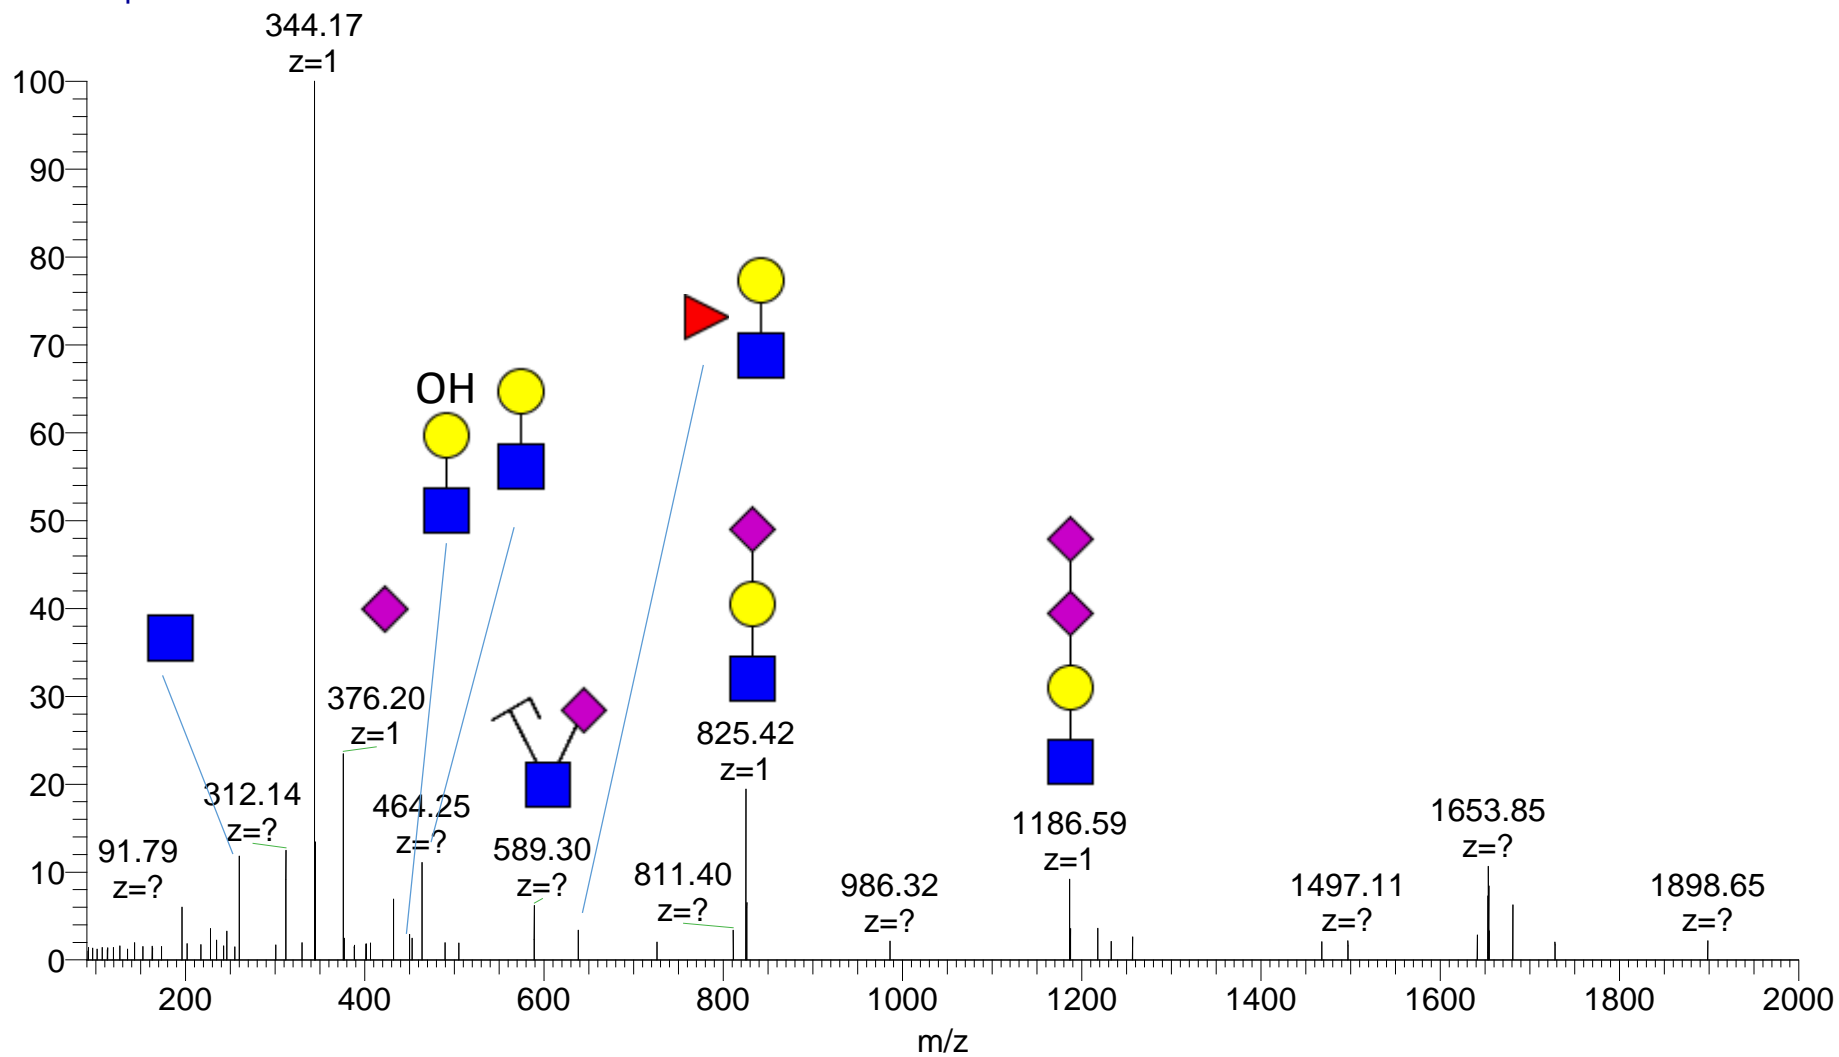

mbrain\_NG #20100 RT: 49.76 AV: 1 NL: 6.62E4  
T: FTMS + p NSI d Full ms2 1662.3514@hcd15.(

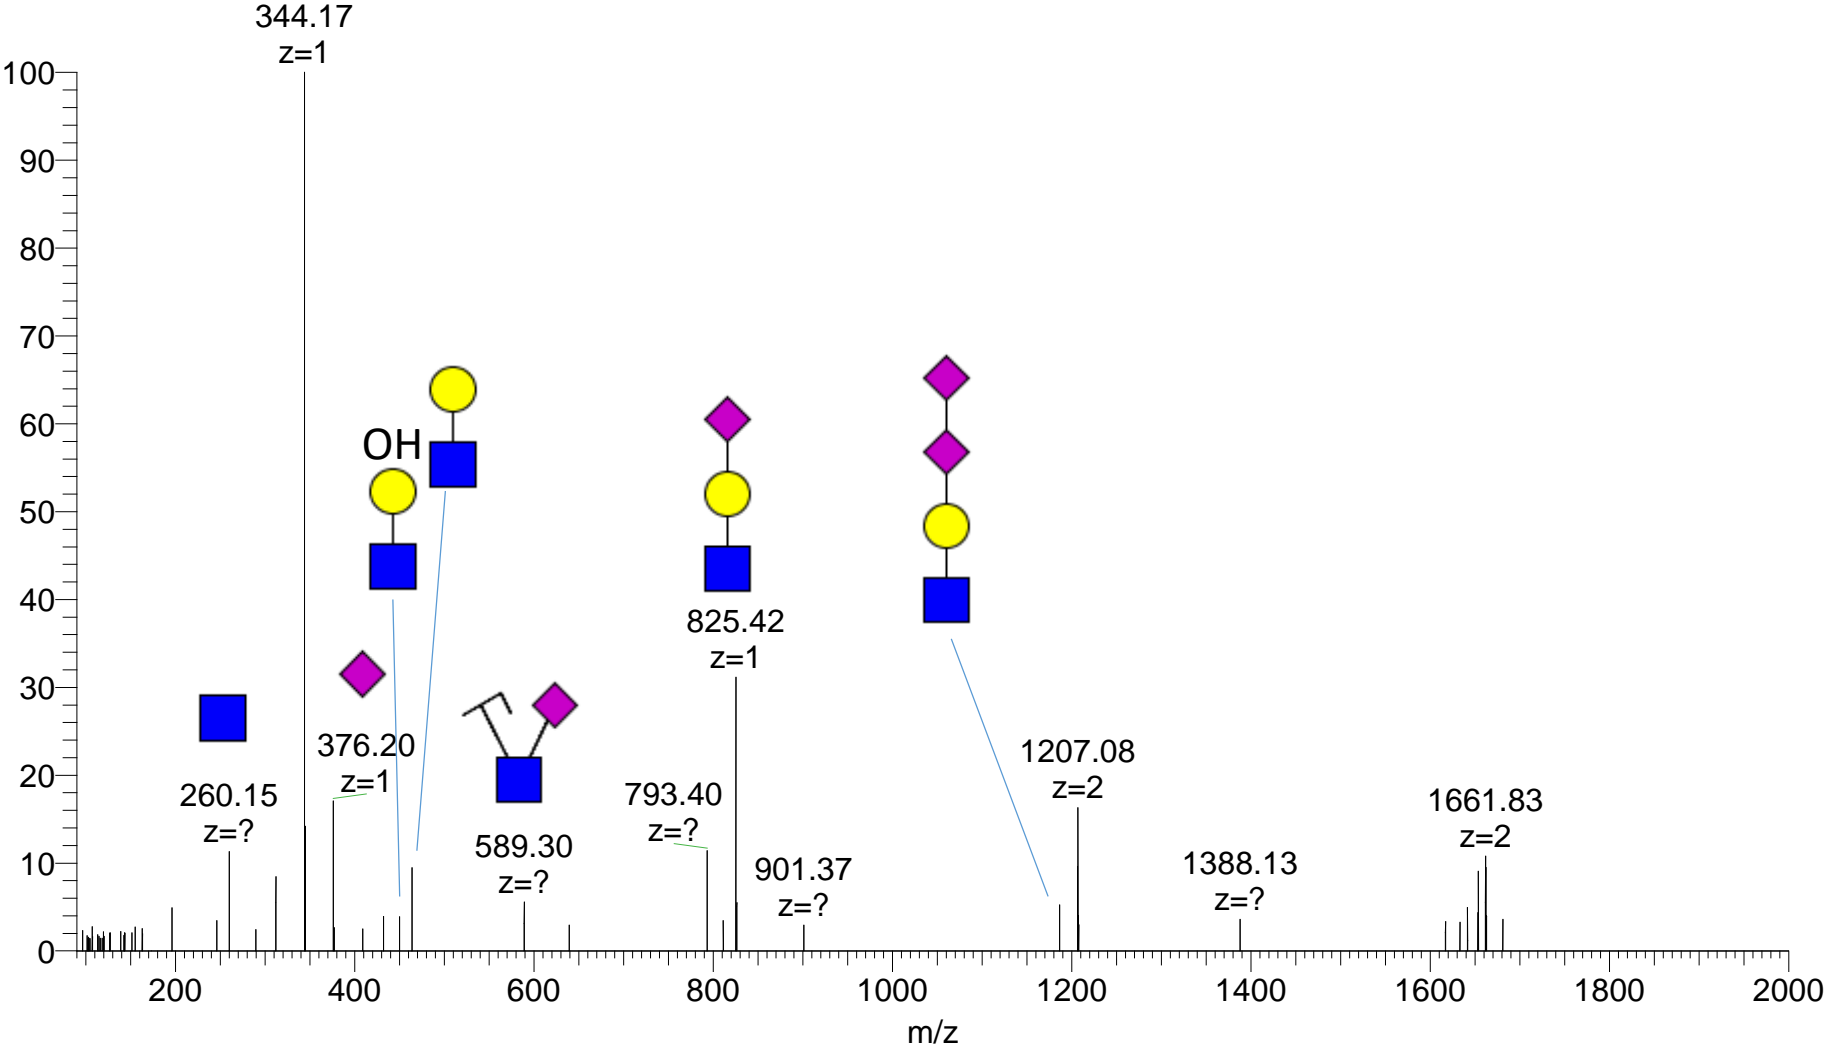

mbrain\_NG #20432 RT: 50.21 AV: 1 NL: 9.74E5  
T: FTMS + p NSI d Full ms2 1145.9235@hcd15.(

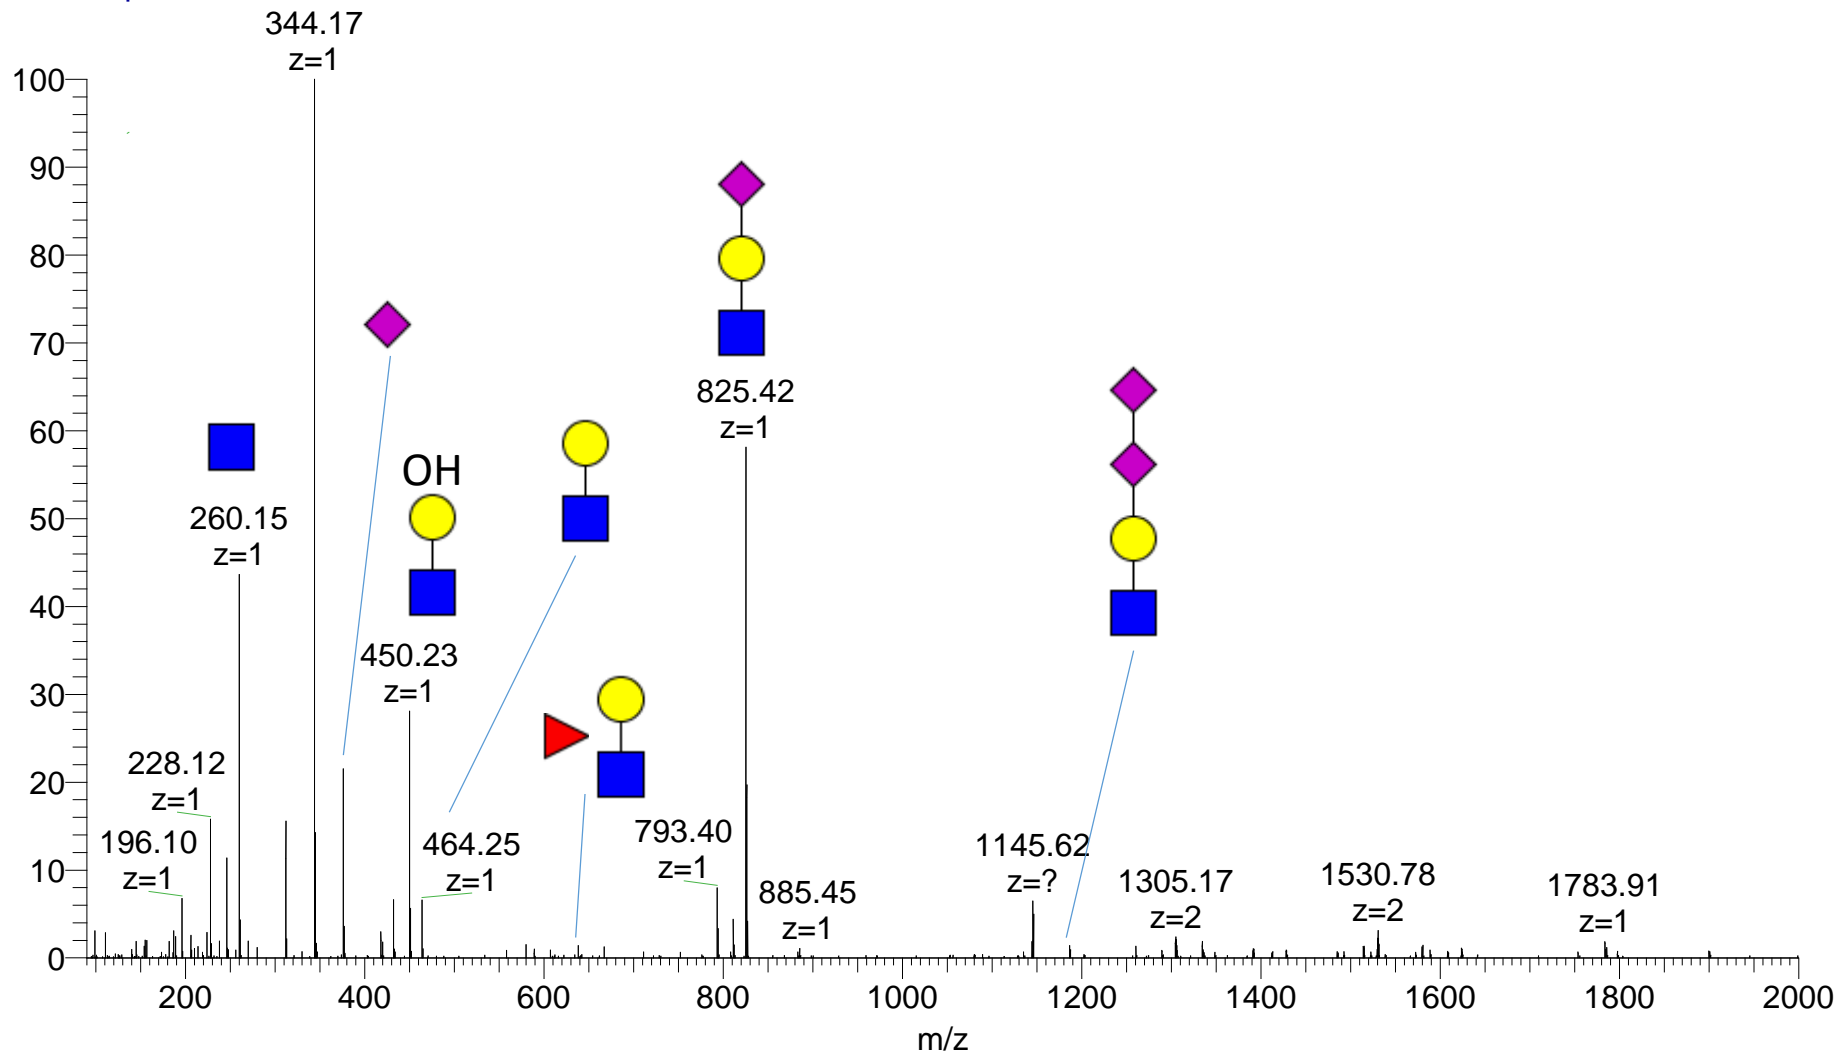

mbrain\_NG #20507 RT: 50.31 AV: 1 NL: 5.11E5  
T: FTMS + p NSI d Full ms2 1112.9000@hcd15.(

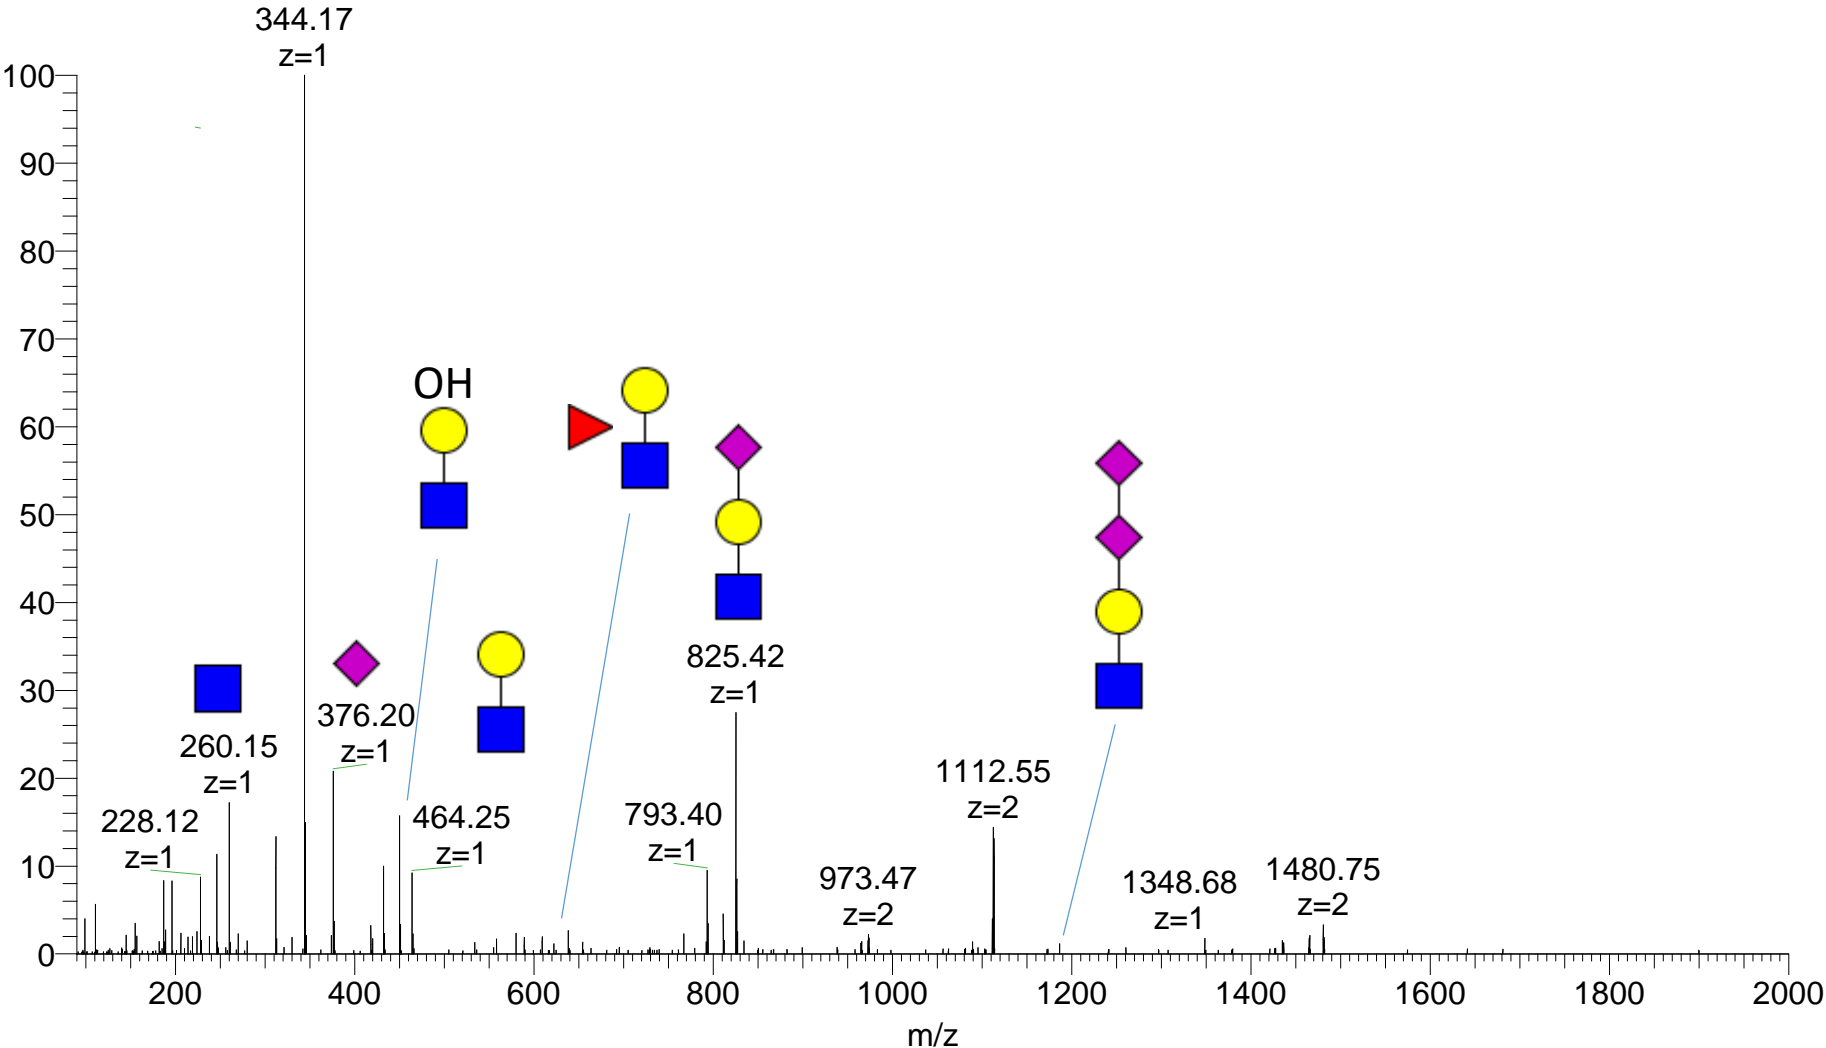



mbrain\_NG #20803 RT: 50.71 AV: 1 NL: 1.17E6  
T: FTMS + p NSI d Full ms2 1040.5350@hcd15.(

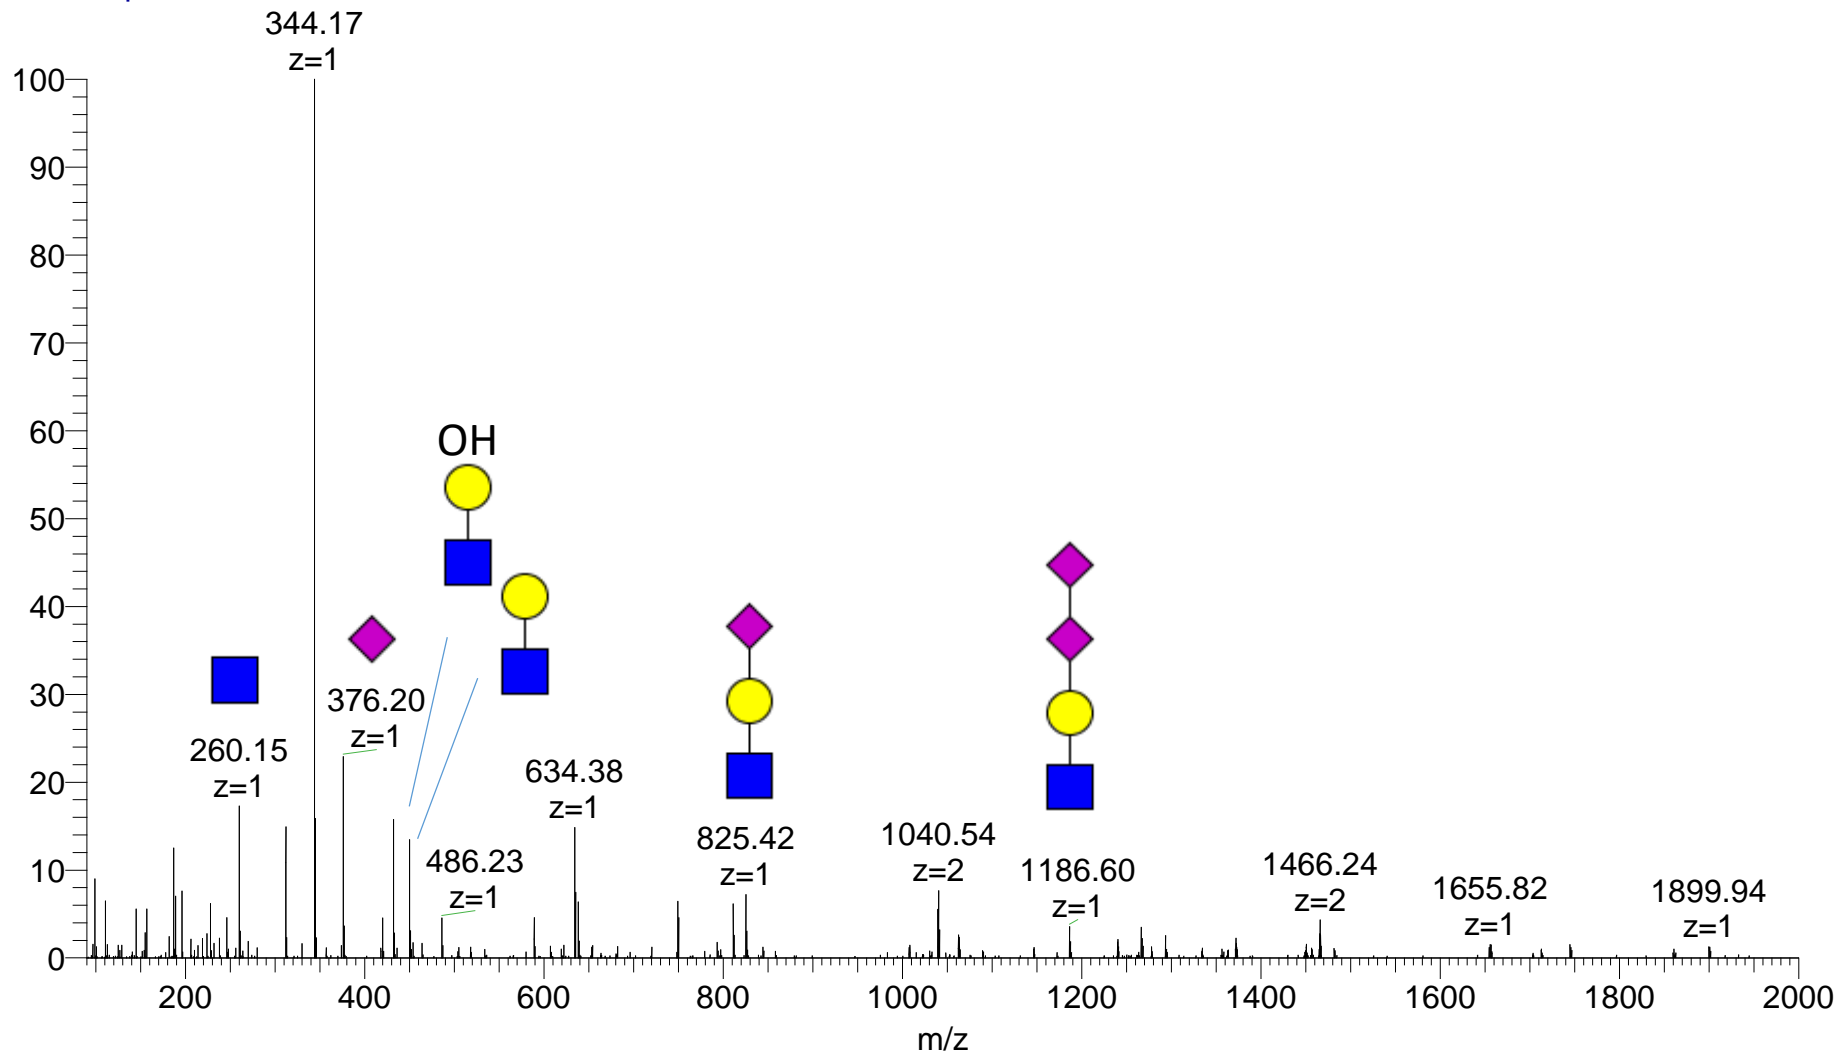

mbrain\_NG #20834 RT: 50.74 AV: 1 NL: 3.44E4  
T: FTMS + p NSI d Full ms2 1682.3595@hcd15.(

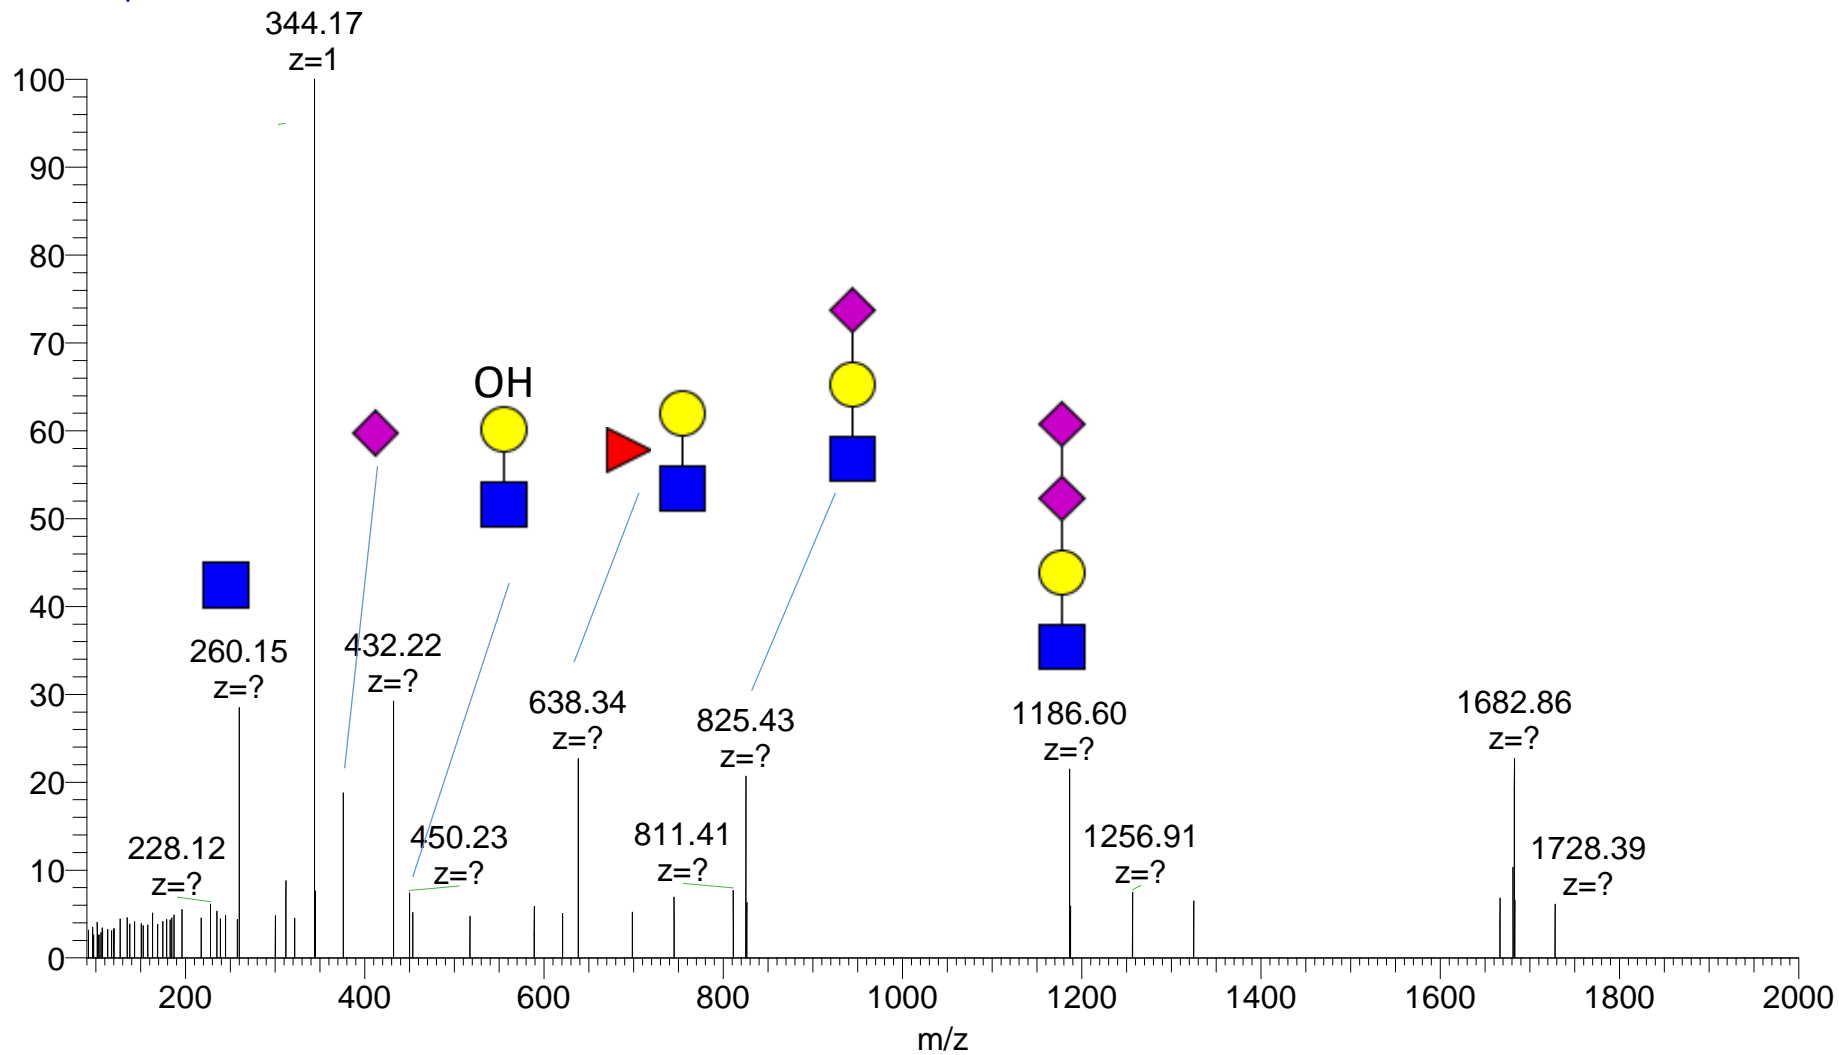

mbrain\_NG #20954 RT: 50.91 AV: 1 NL: 7.25E5  
T: FTMS + p NSI d Full ms2 1311.0042@hcd15.(

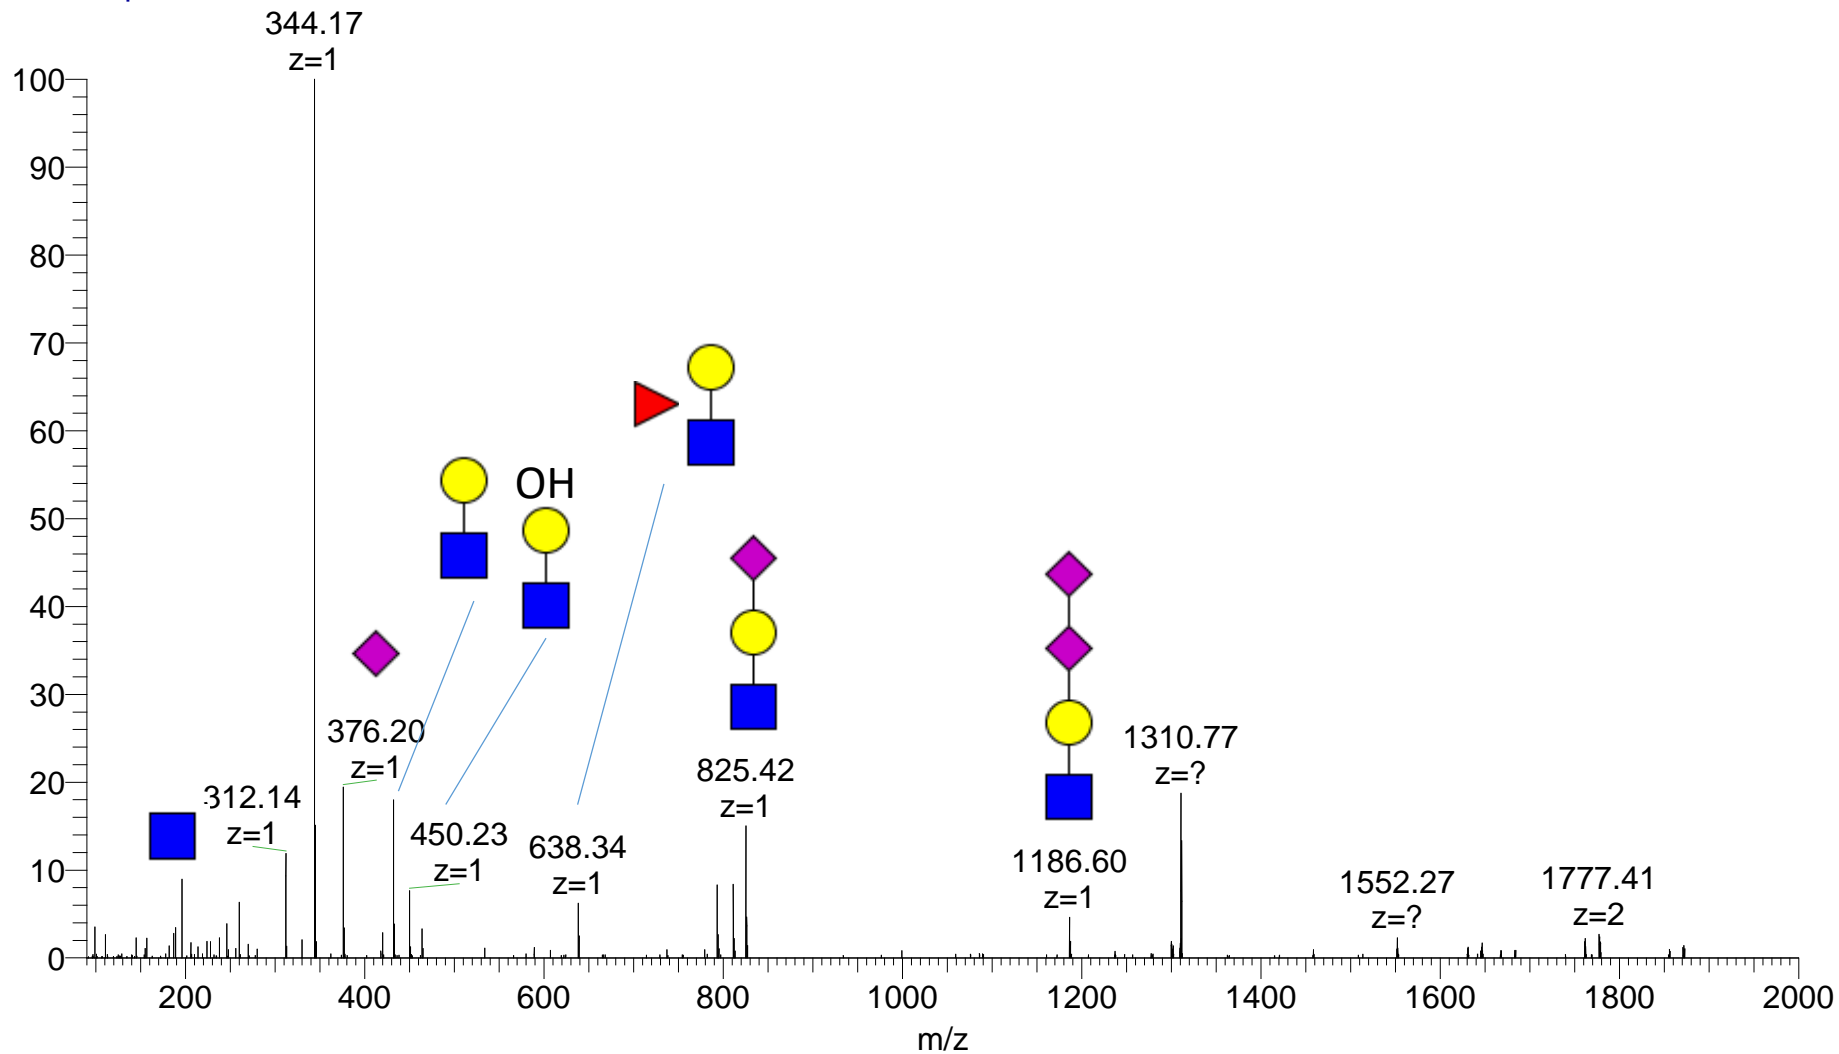

mbrain\_NG #21482 RT: 51.62 AV: 1 NL: 3.98E5  
T: FTMS + p NSI d Full ms2 1455.0747@hcd15.(

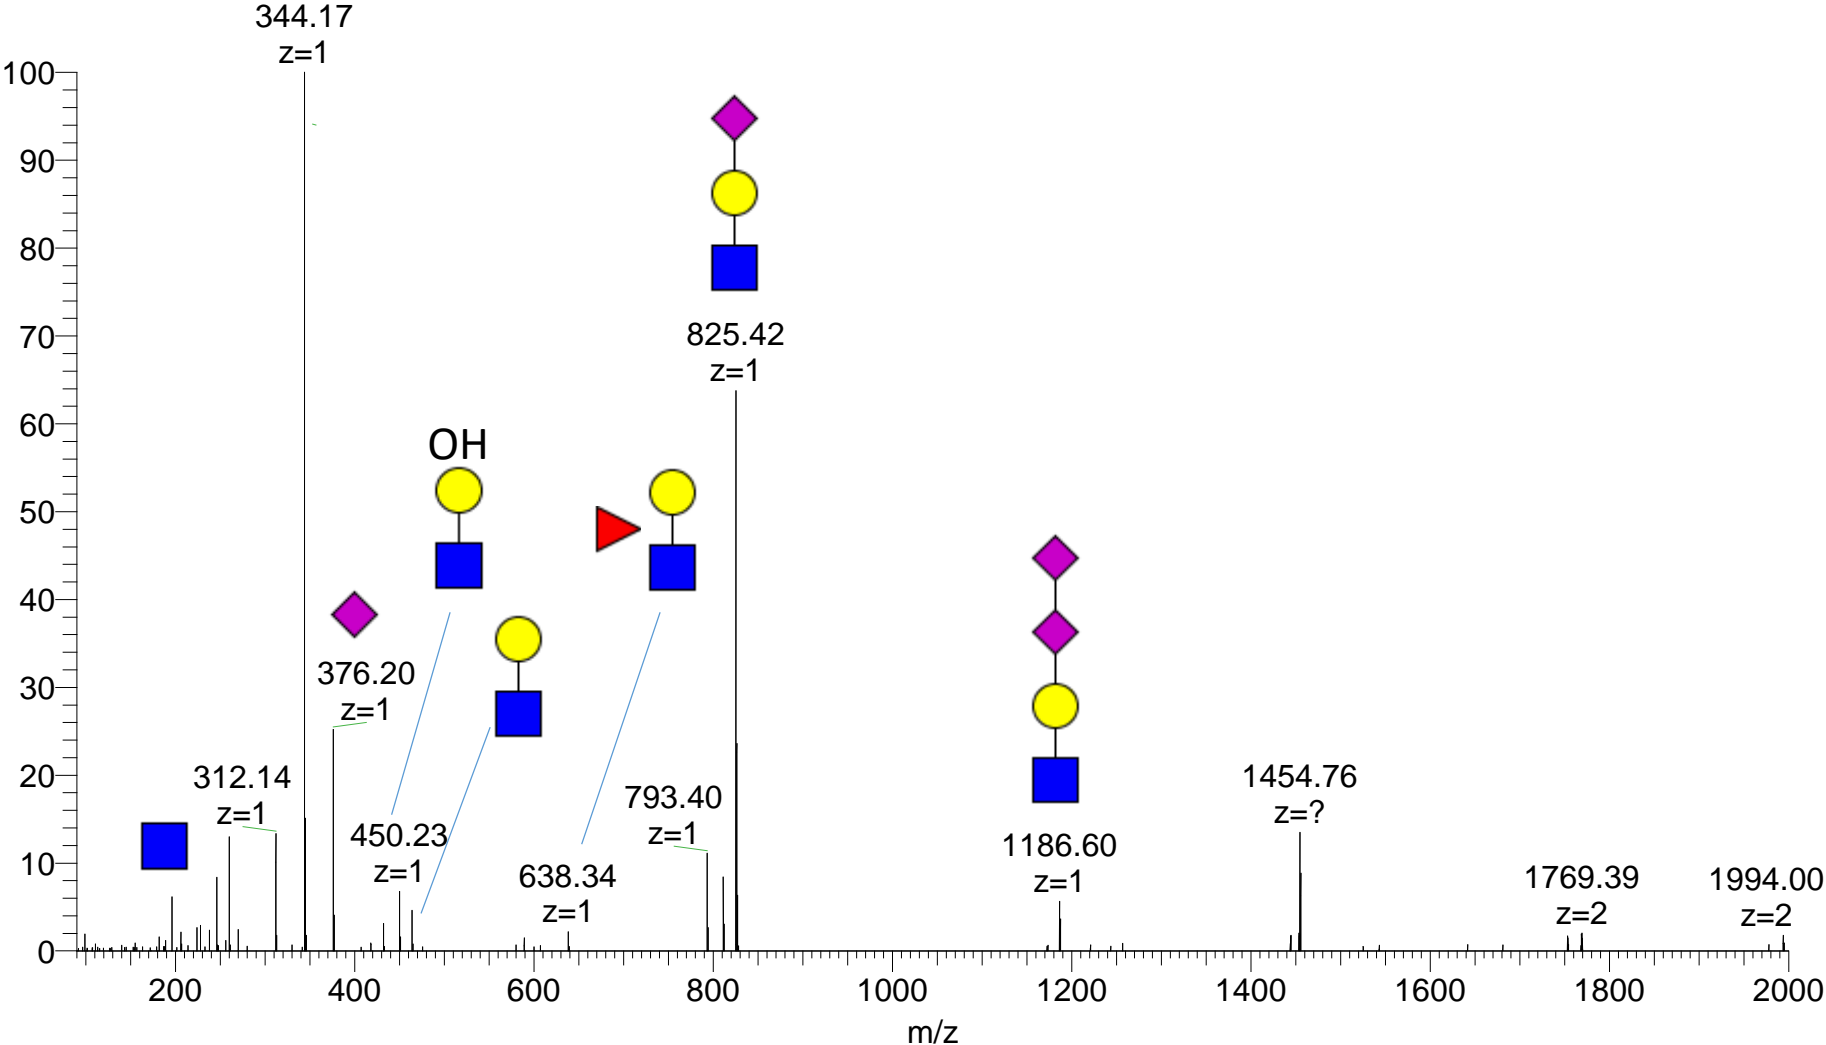

mbrain\_NG #21687 RT: 51.89 AV: 1 NL: 8.50E4  
T: FTMS + p NSI d Full ms2 1405.7115@hcd15.(

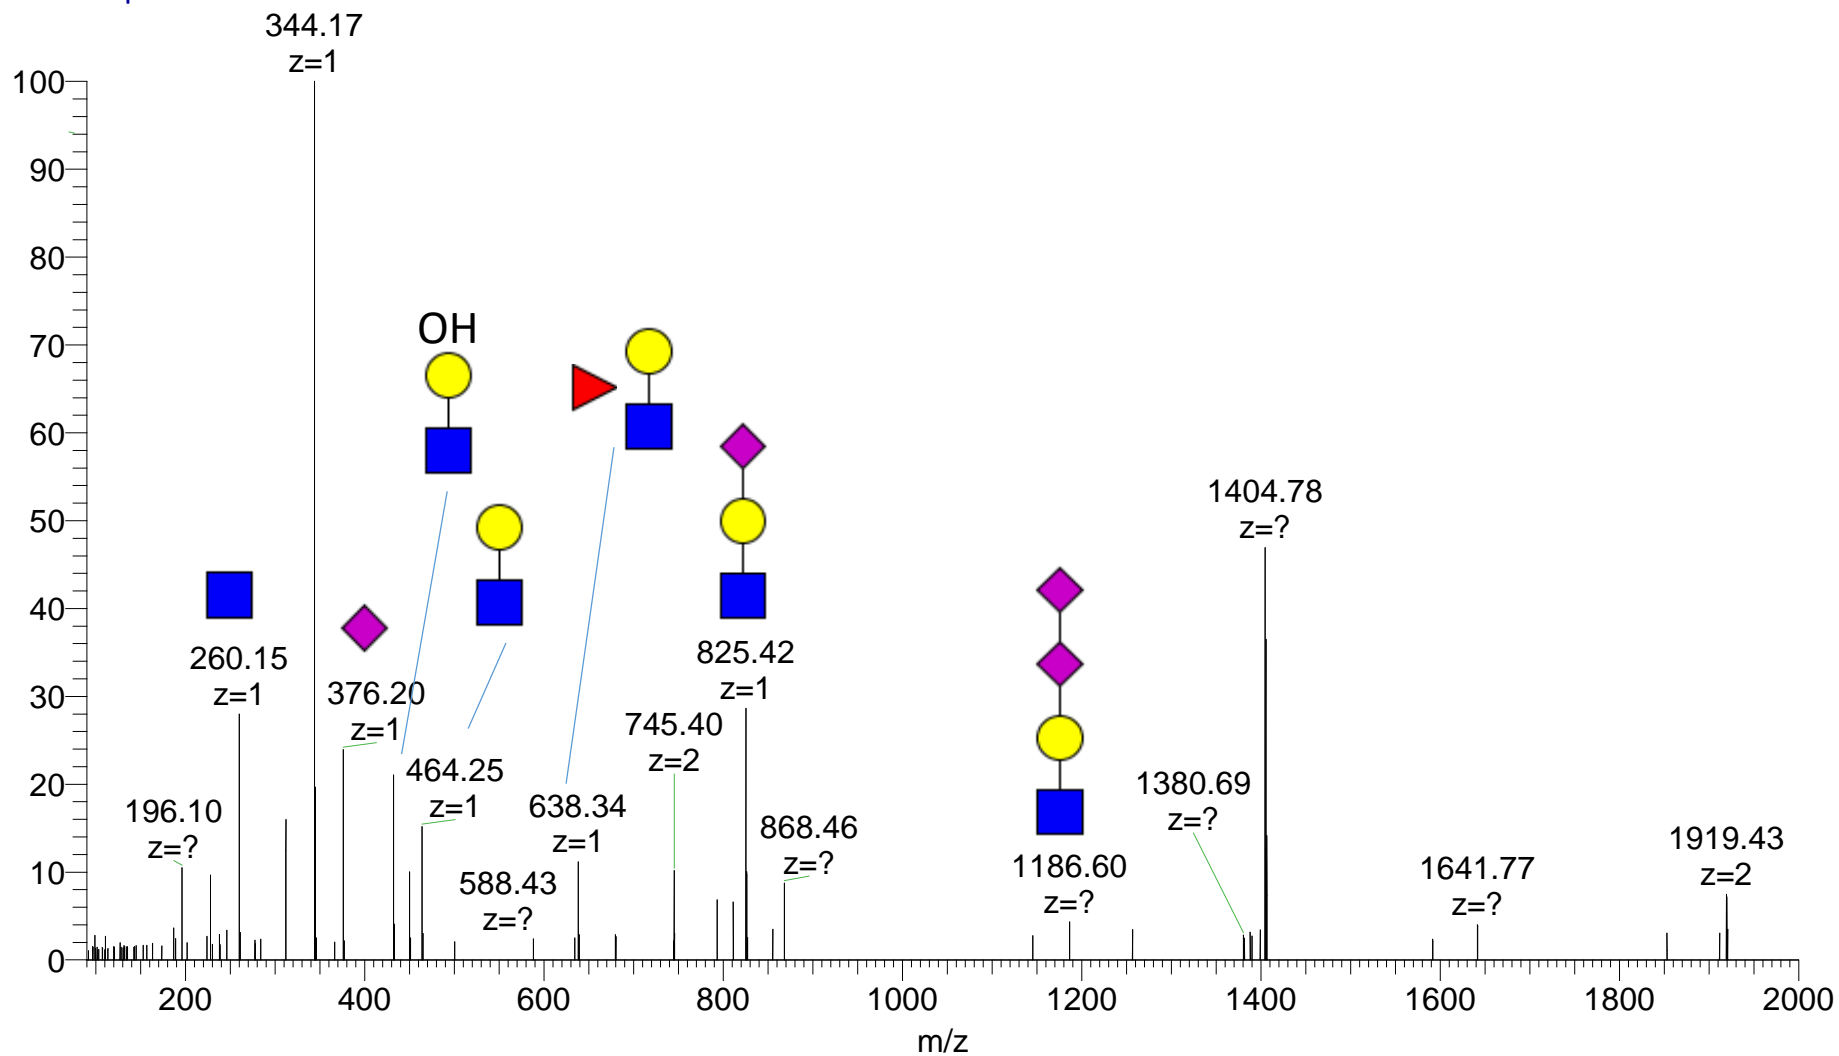

mbrain\_NG #22000 RT: 52.29 AV: 1 NL: 4.61E5  
T: FTMS + p NSI d Full ms2 1252.9736@hcd15.(

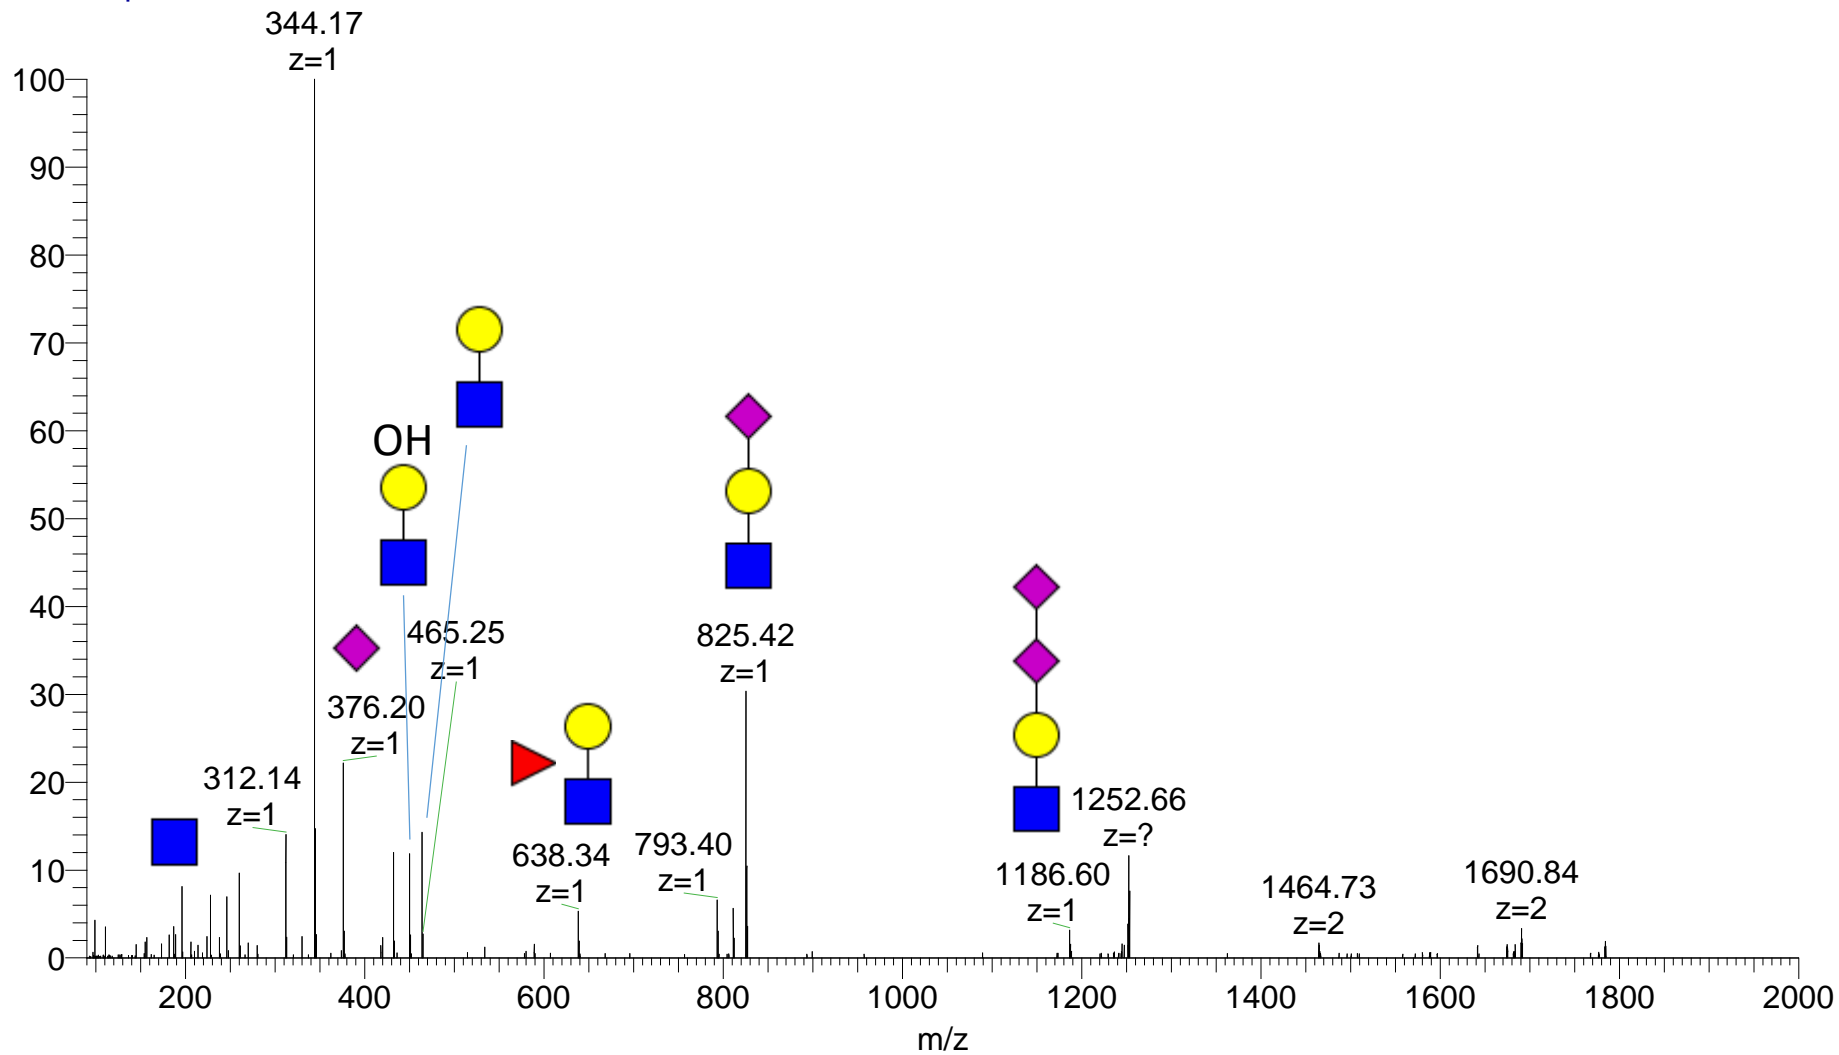

mbrain\_NG #22259 RT: 52.64 AV: 1 NL: 1.20E6  
T: FTMS + p NSI d Full ms2 1204.2867@hcd15.(

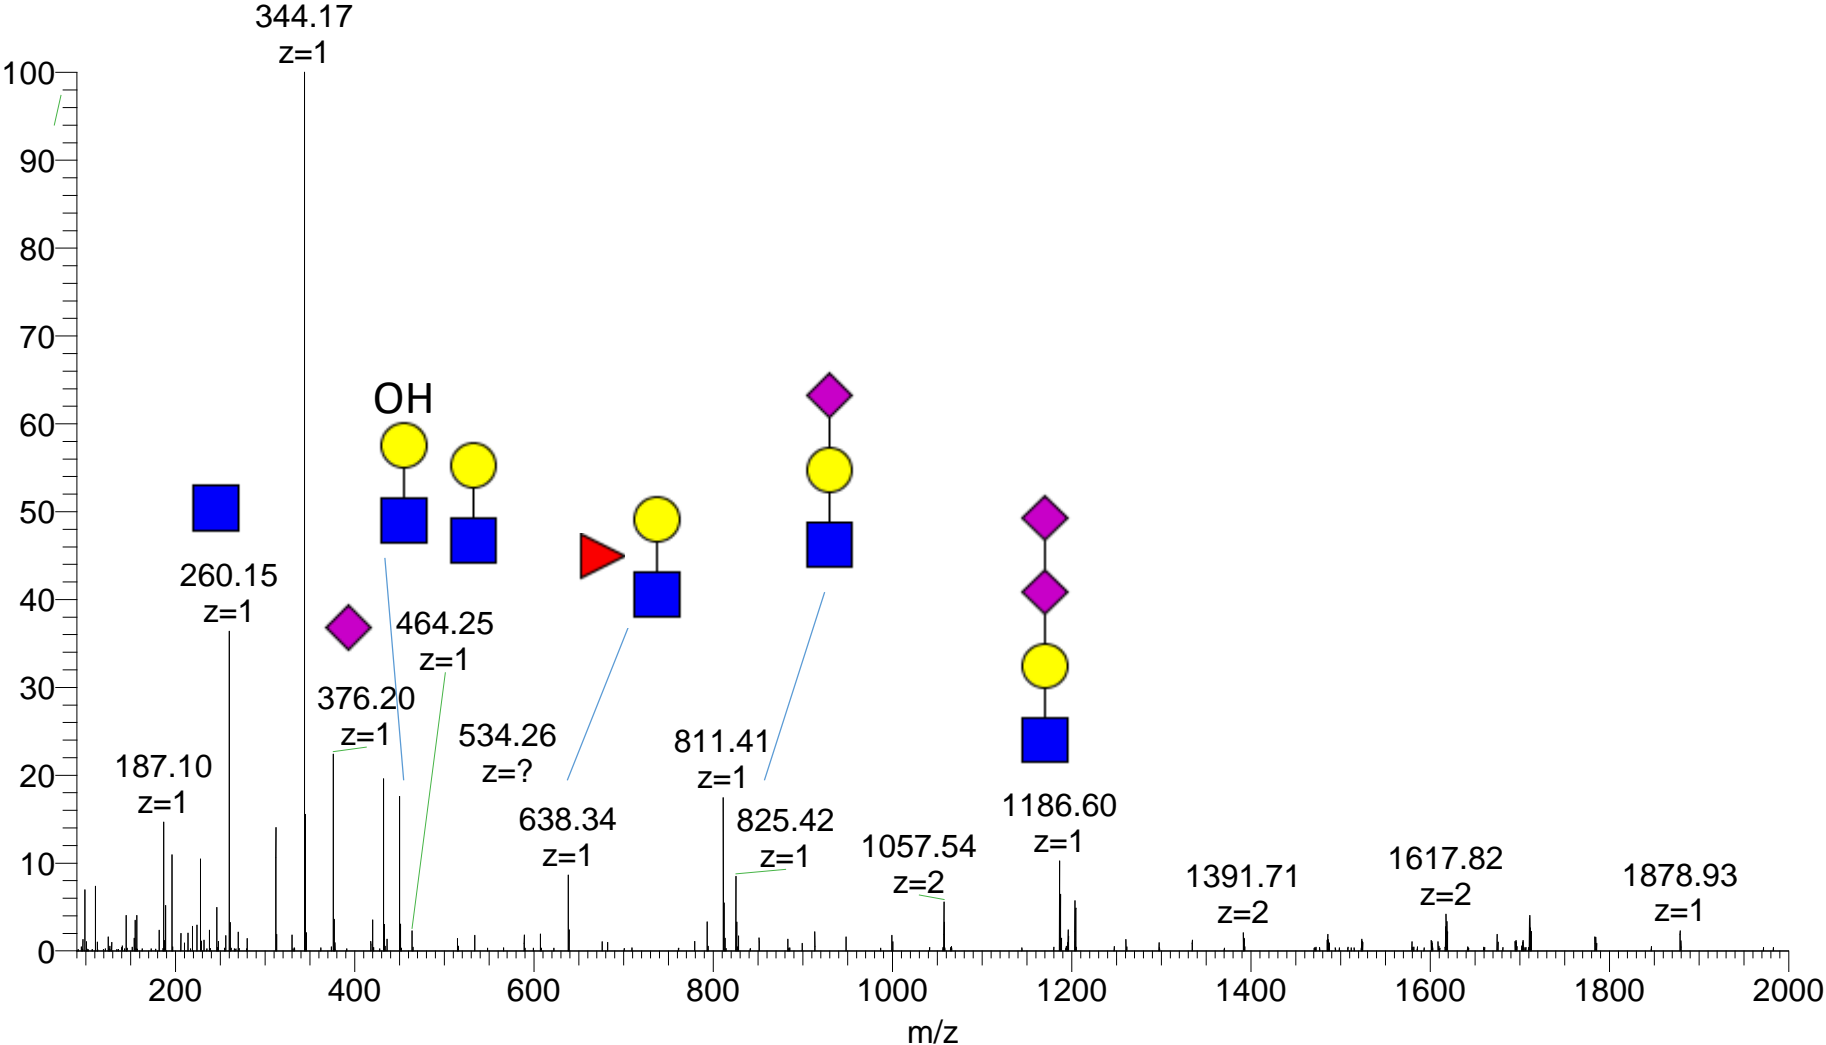

mbrain\_NG #22386 RT: 52.80 AV: 1 NL: 4.49E5  
T: FTMS + p NSI d Full ms2 1266.9810@hcd15.(

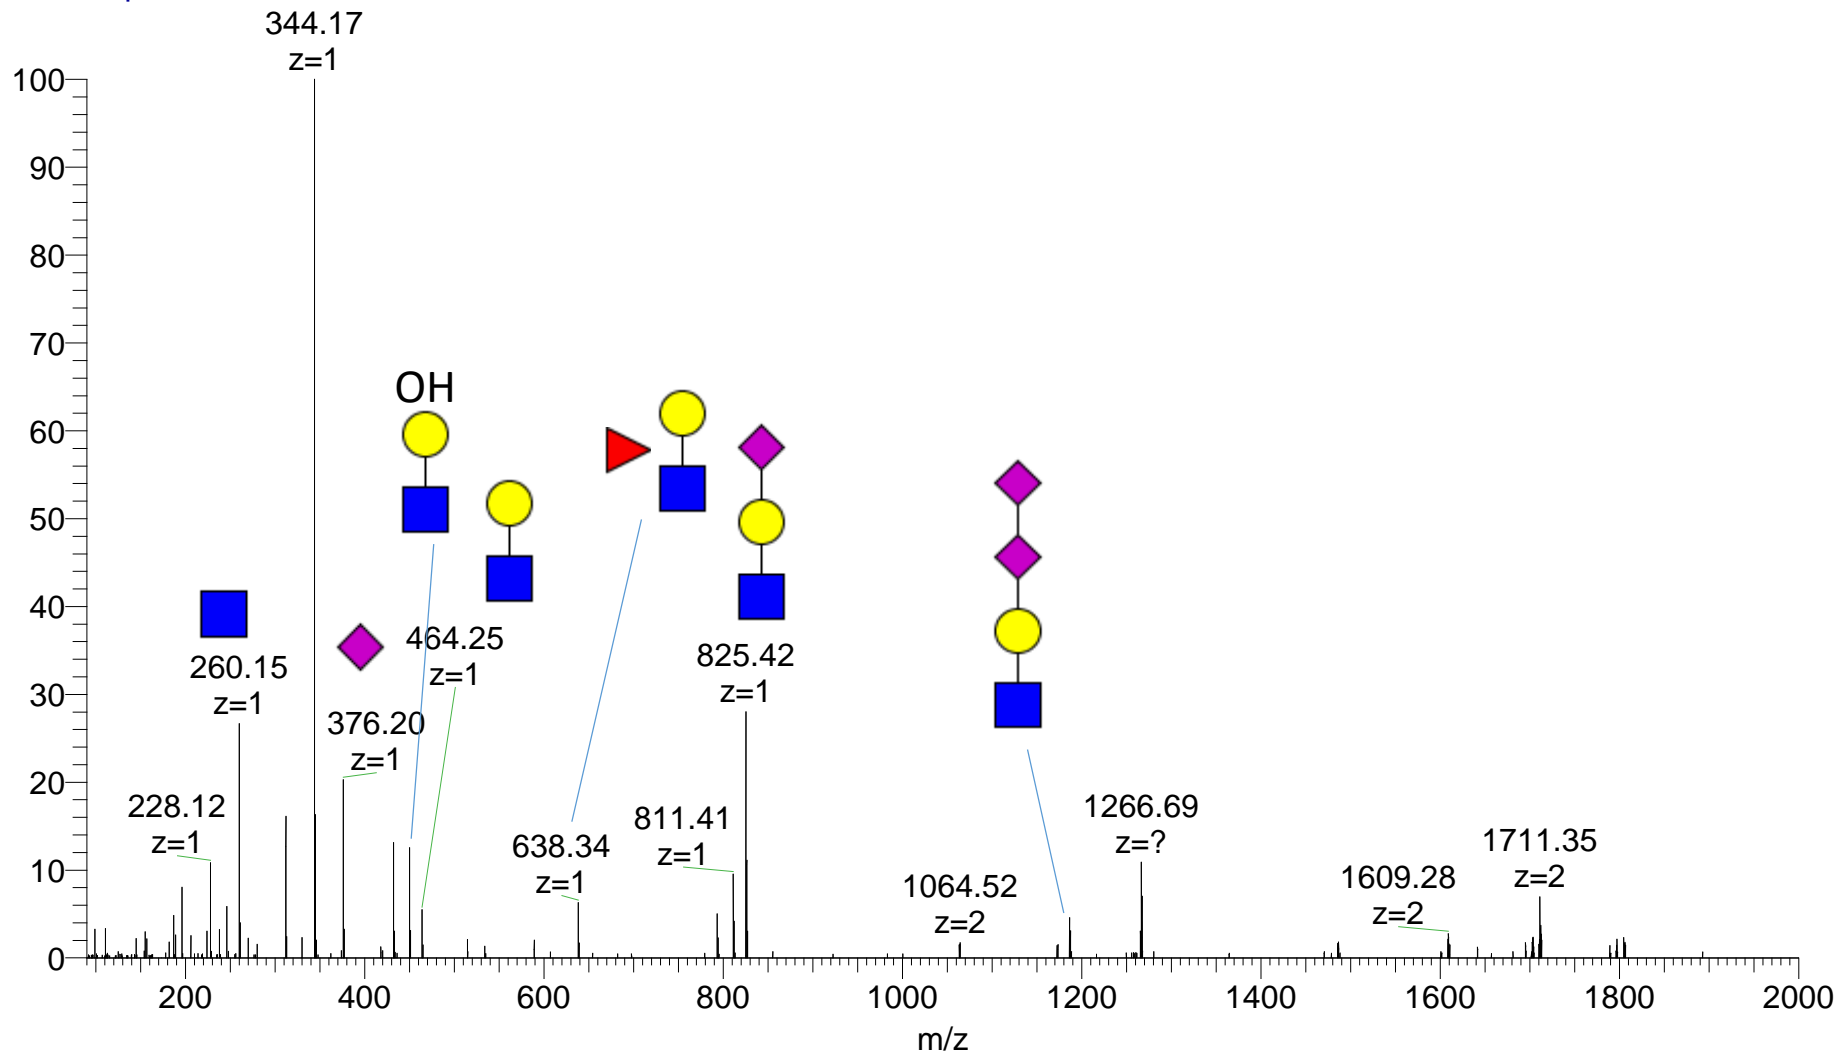



mbrain\_NG #22642 RT: 53.13 AV: 1 NL: 9.20E5  
T: FTMS + p NSI d Full ms2 1001.2636@hcd15.(

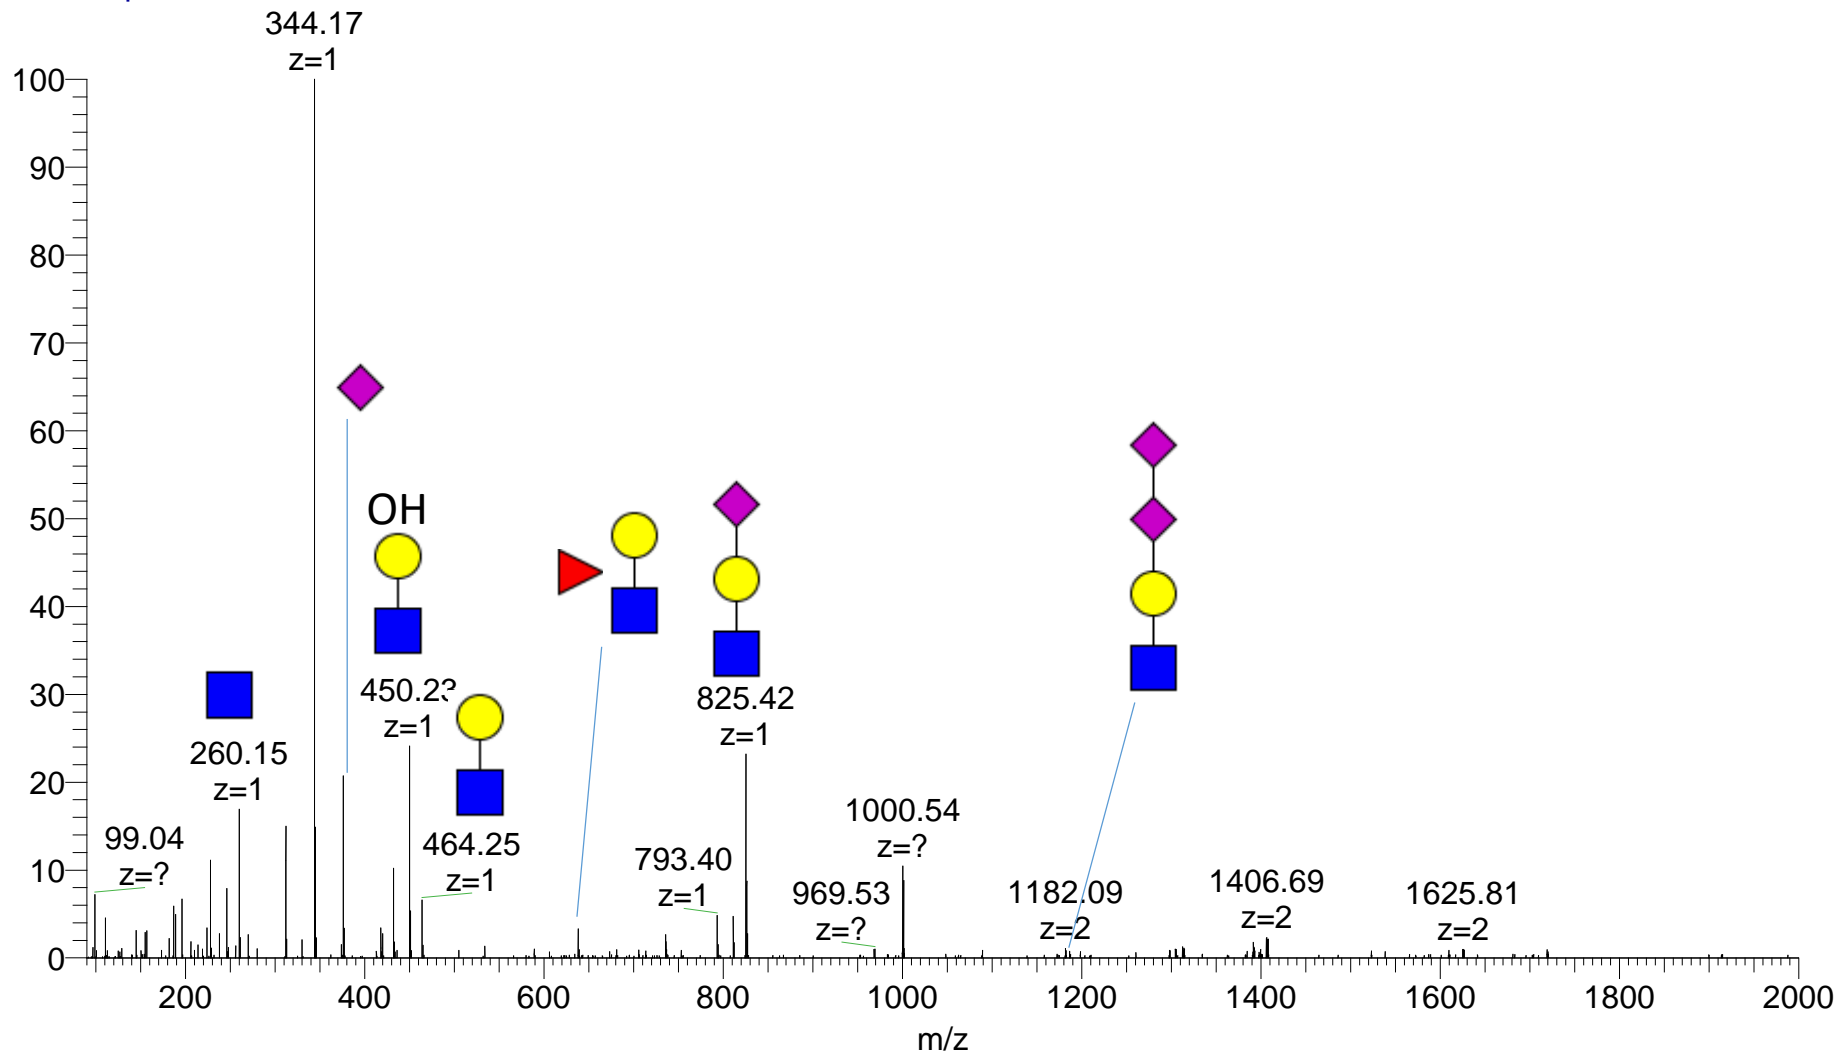

mbrain\_NG #22652 RT: 53.14 AV: 1 NL: 3.20E5

T: FTMS + p NSI d Full ms2 1305.9972@hcd15.(

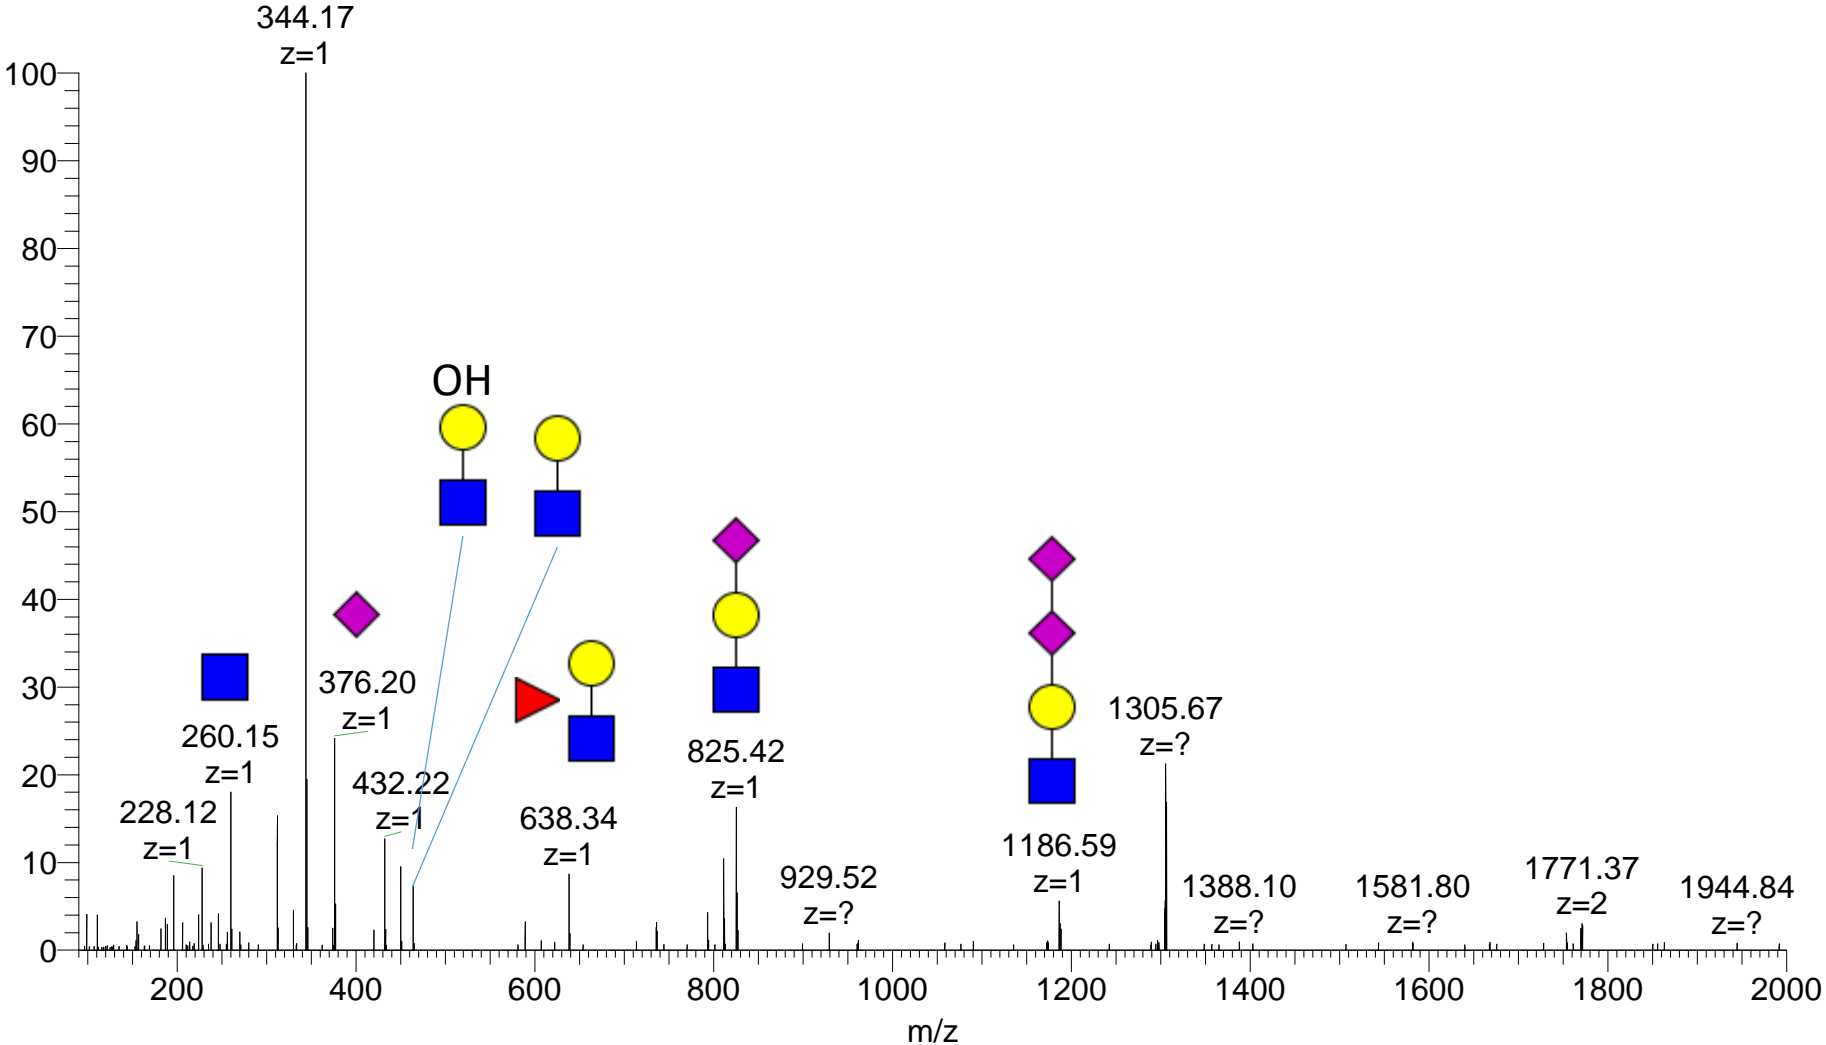

mbrain\_NG #22661 RT: 53.15 AV: 1 NL: 1.34E5  
T: FTMS + p NSI d Full ms2 1575.4630@hcd15.(

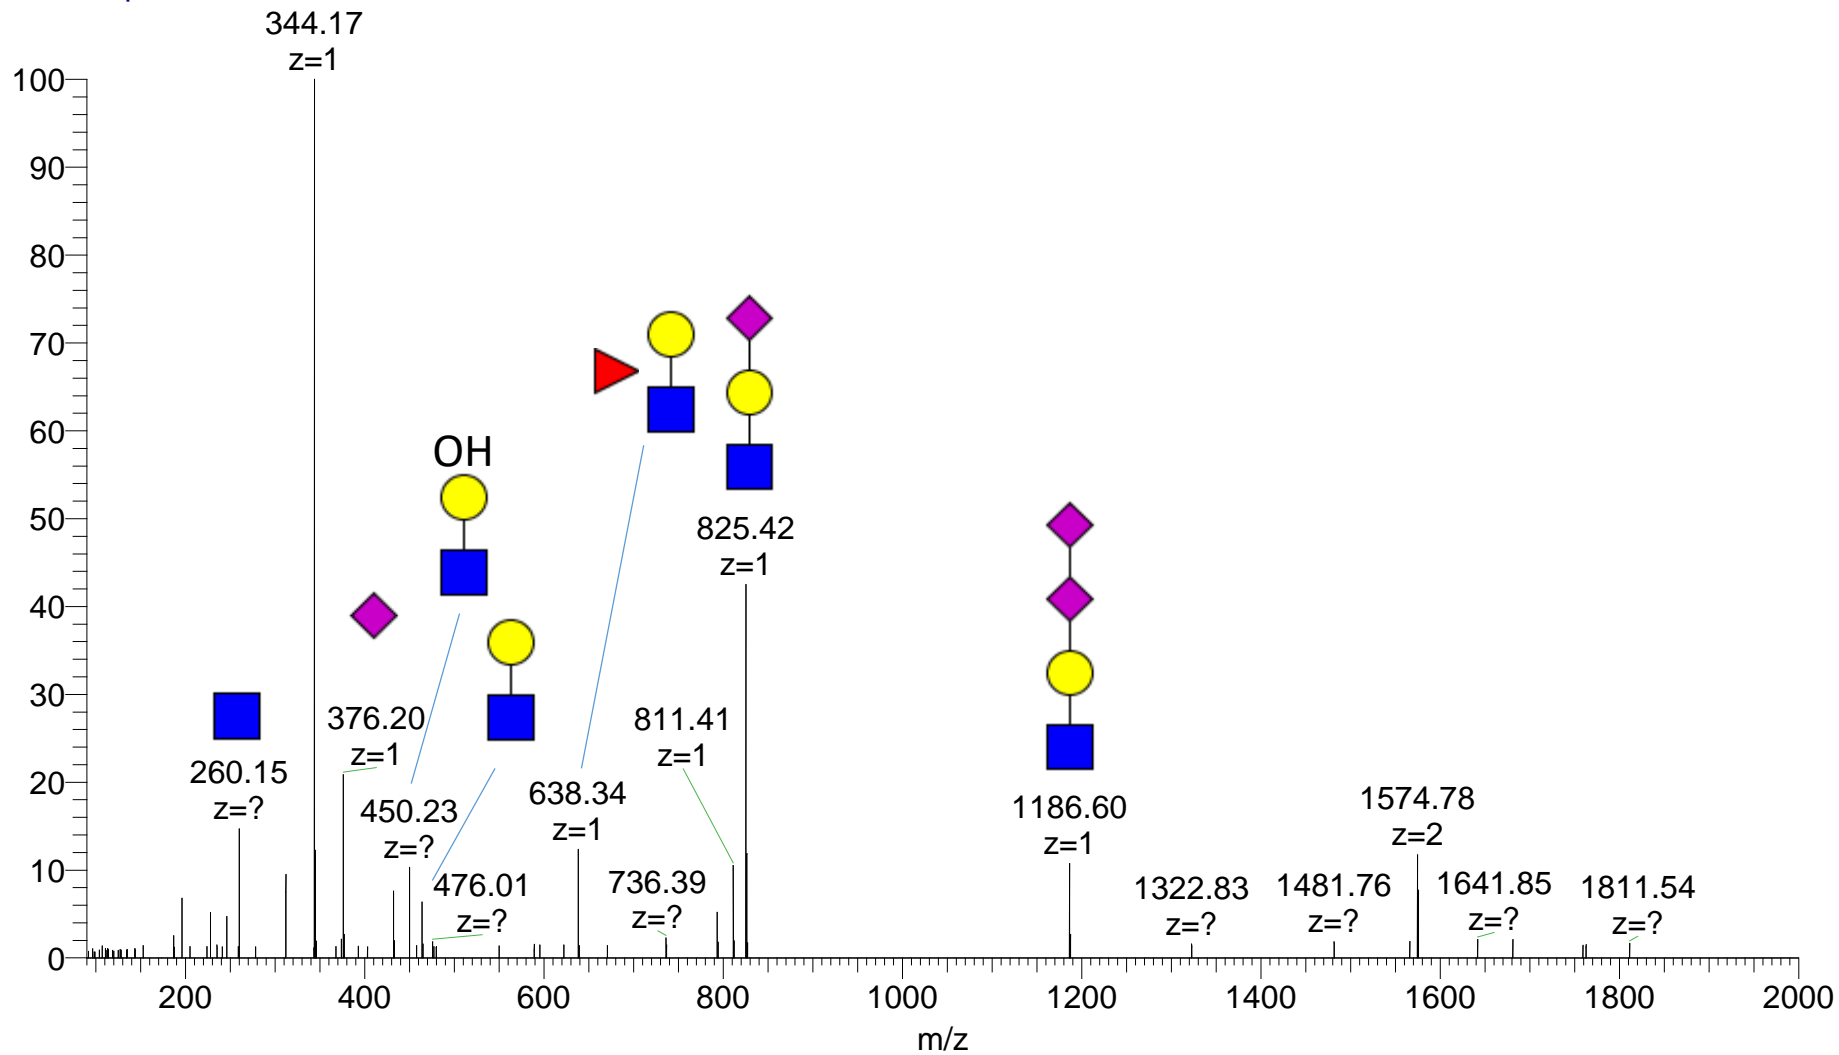

mbrain\_NG #22679 RT: 53.18 AV: 1 NL: 1.35E6  
T: FTMS + p NSI d Full ms2 1120.8206@hcd15.(

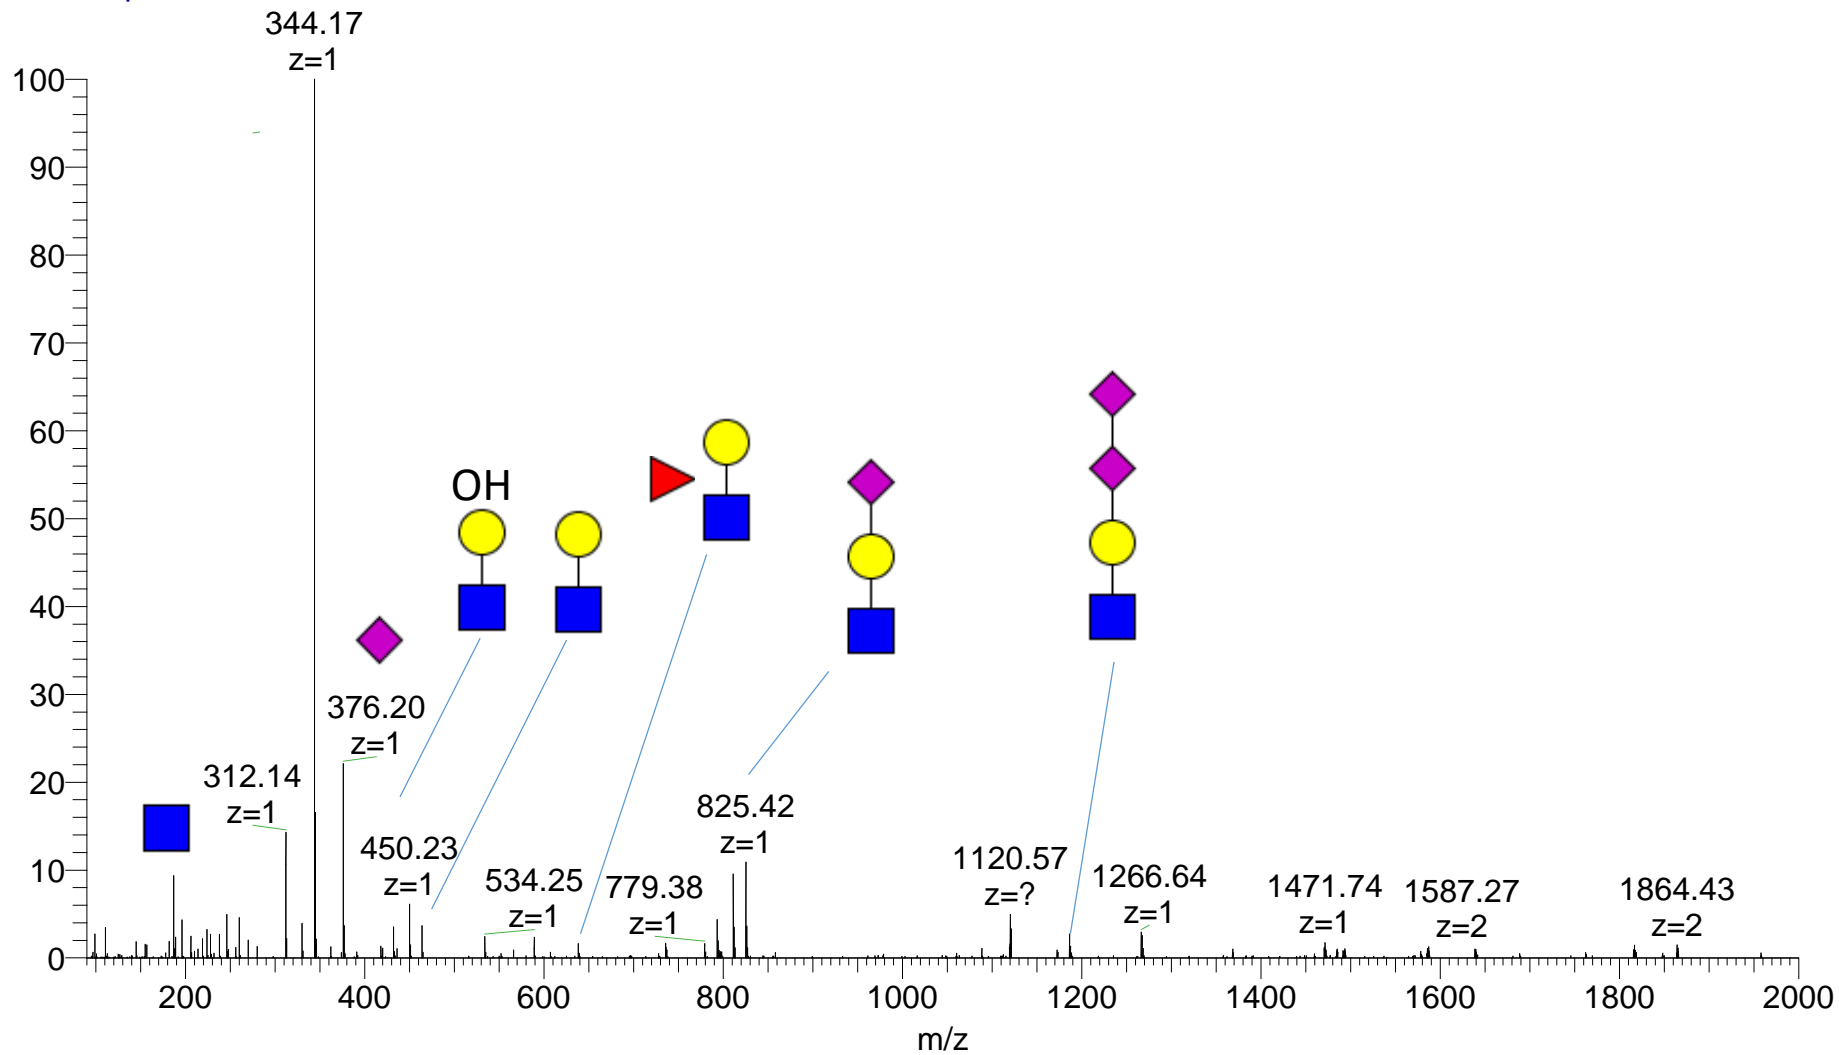

mbrain\_NG #22709 RT: 53.21 AV: 1 NL: 3.19E5  
T: FTMS + p NSI d Full ms2 1320.3394@hcd15.(

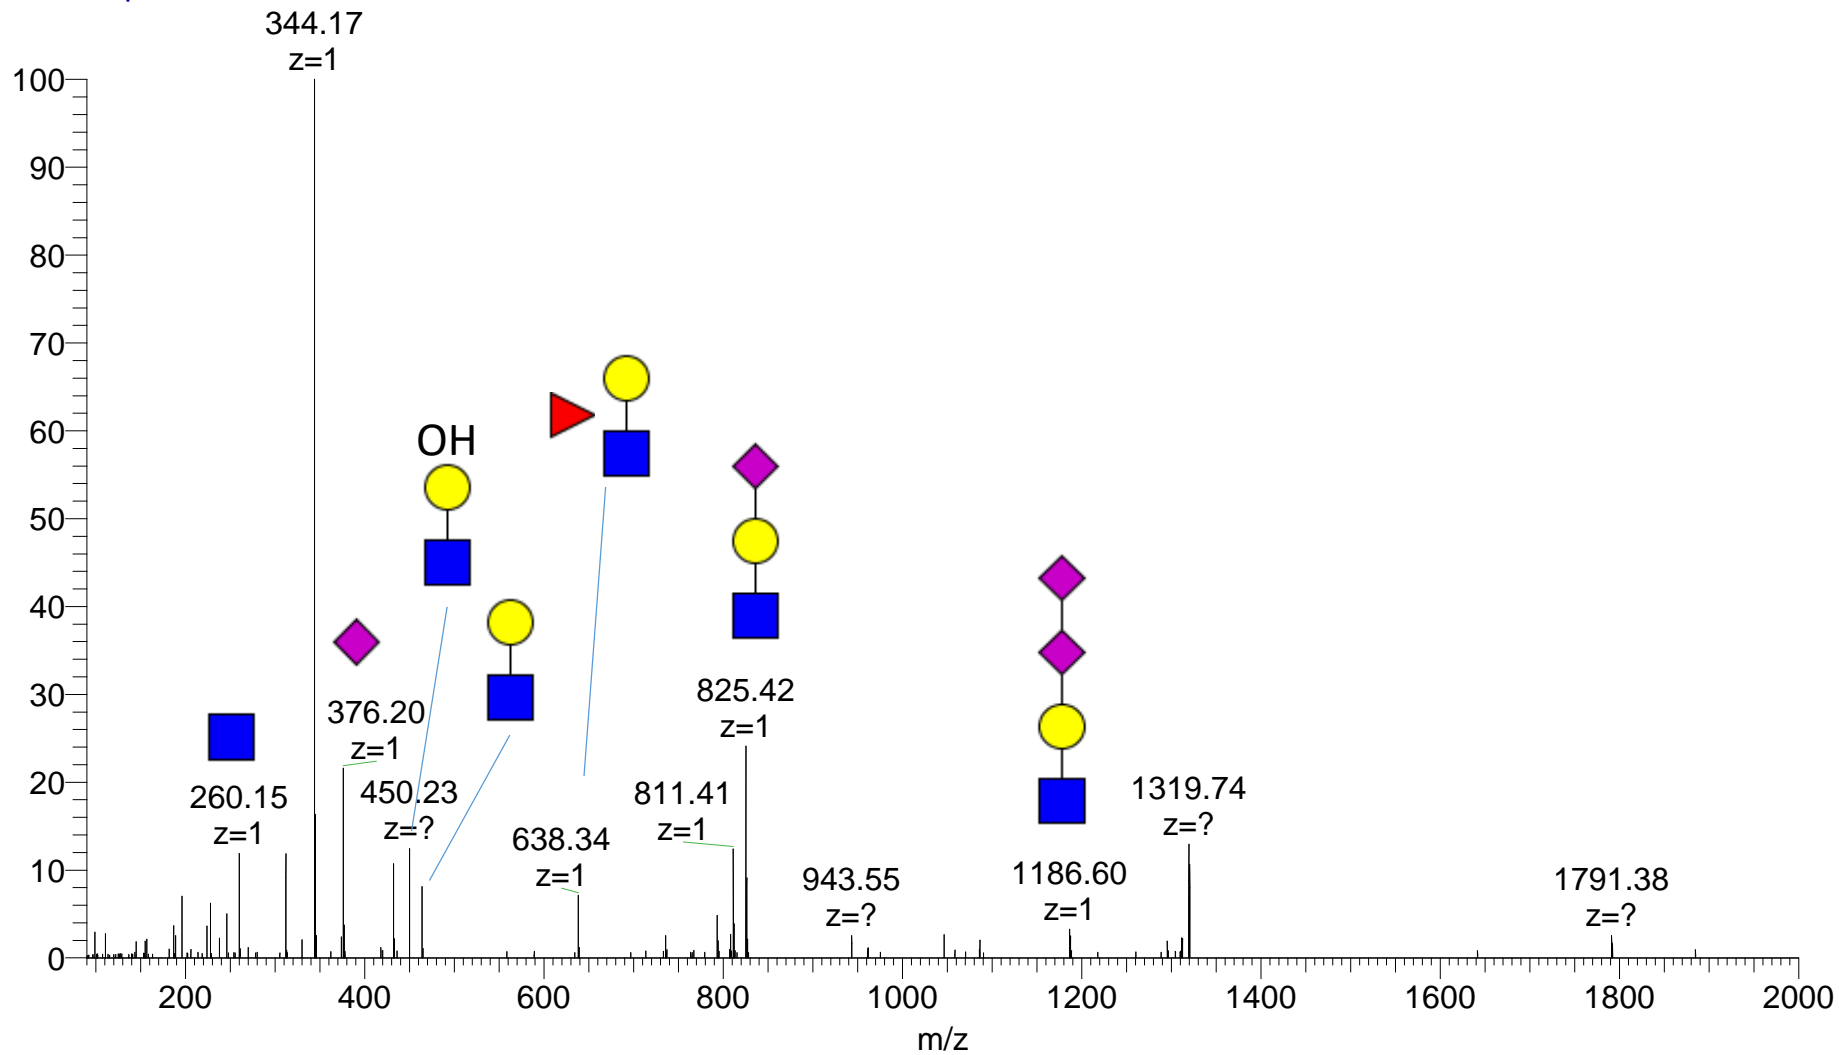

mbrain\_NG #22803 RT: 53.34 AV: 1 NL: 5.28E5  
T: FTMS + p NSI d Full ms2 1455.7413@hcd15.(

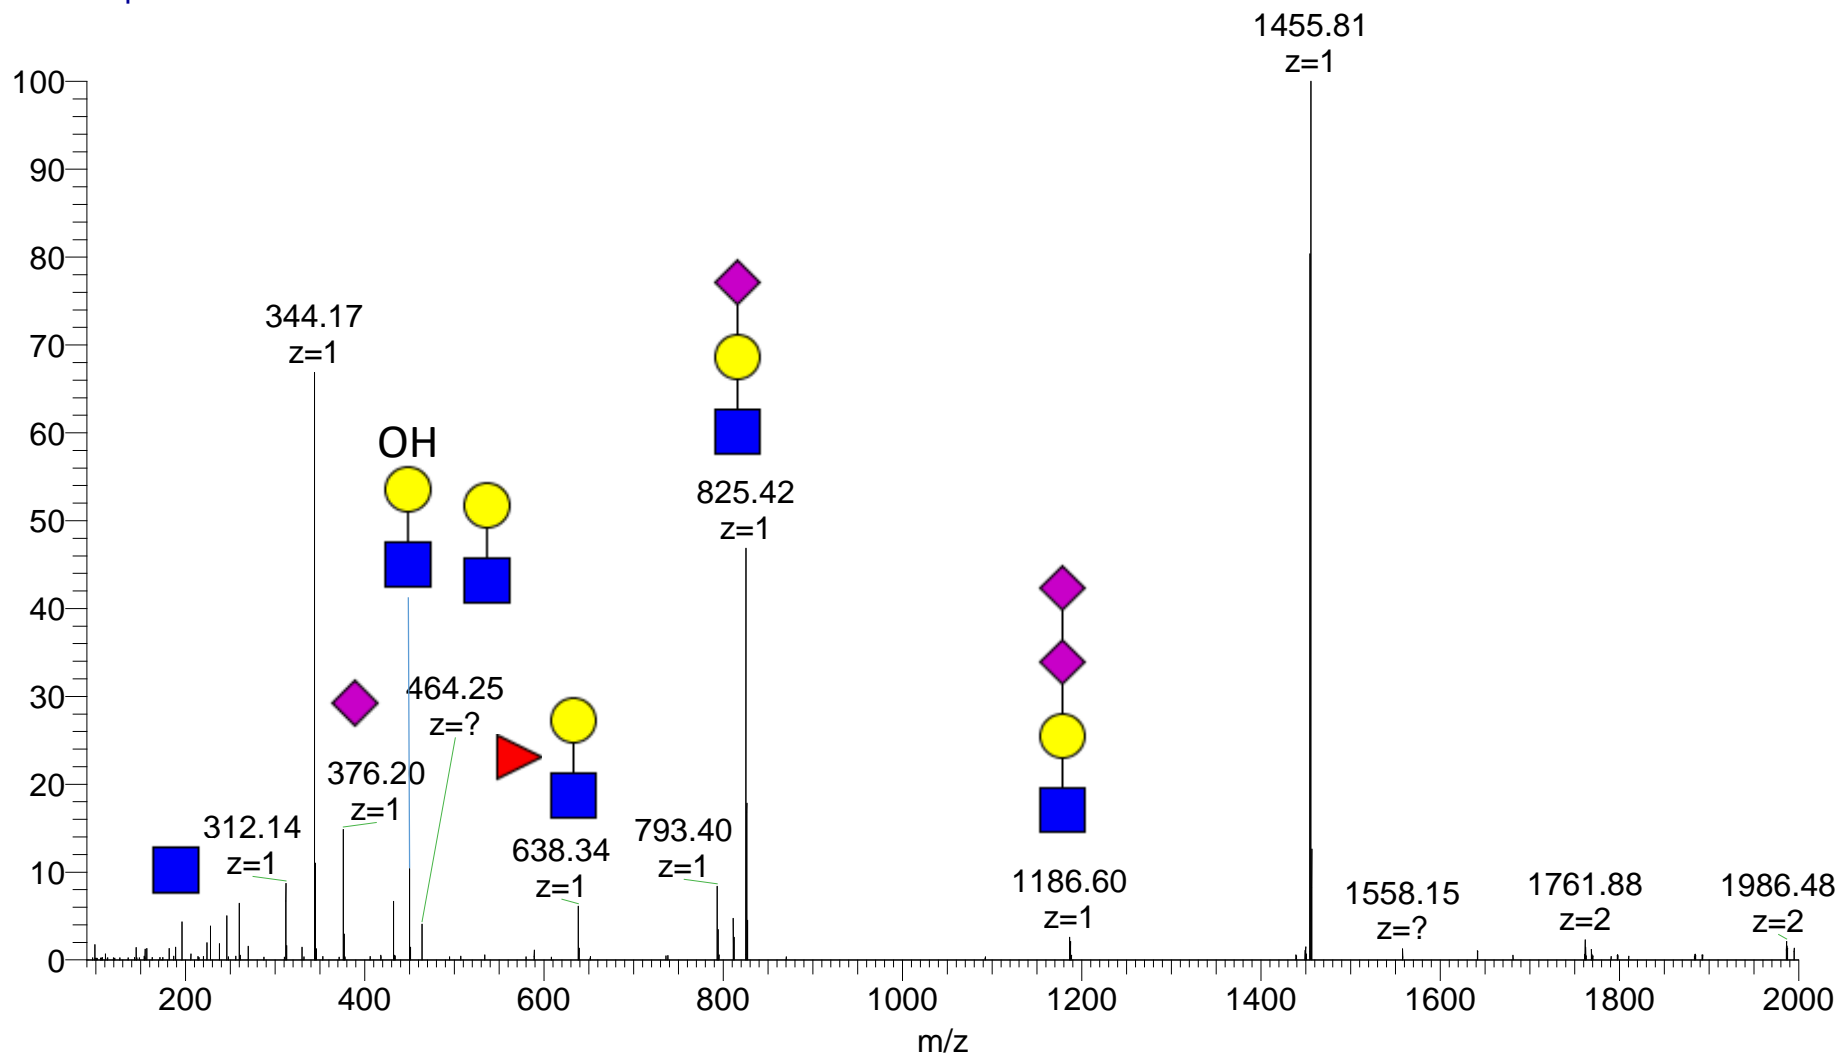

mbrain\_NG #22896 RT: 53.46 AV: 1 NL: 1.43E5  
T: FTMS + p NSI d Full ms2 1528.4529@hcd15.(

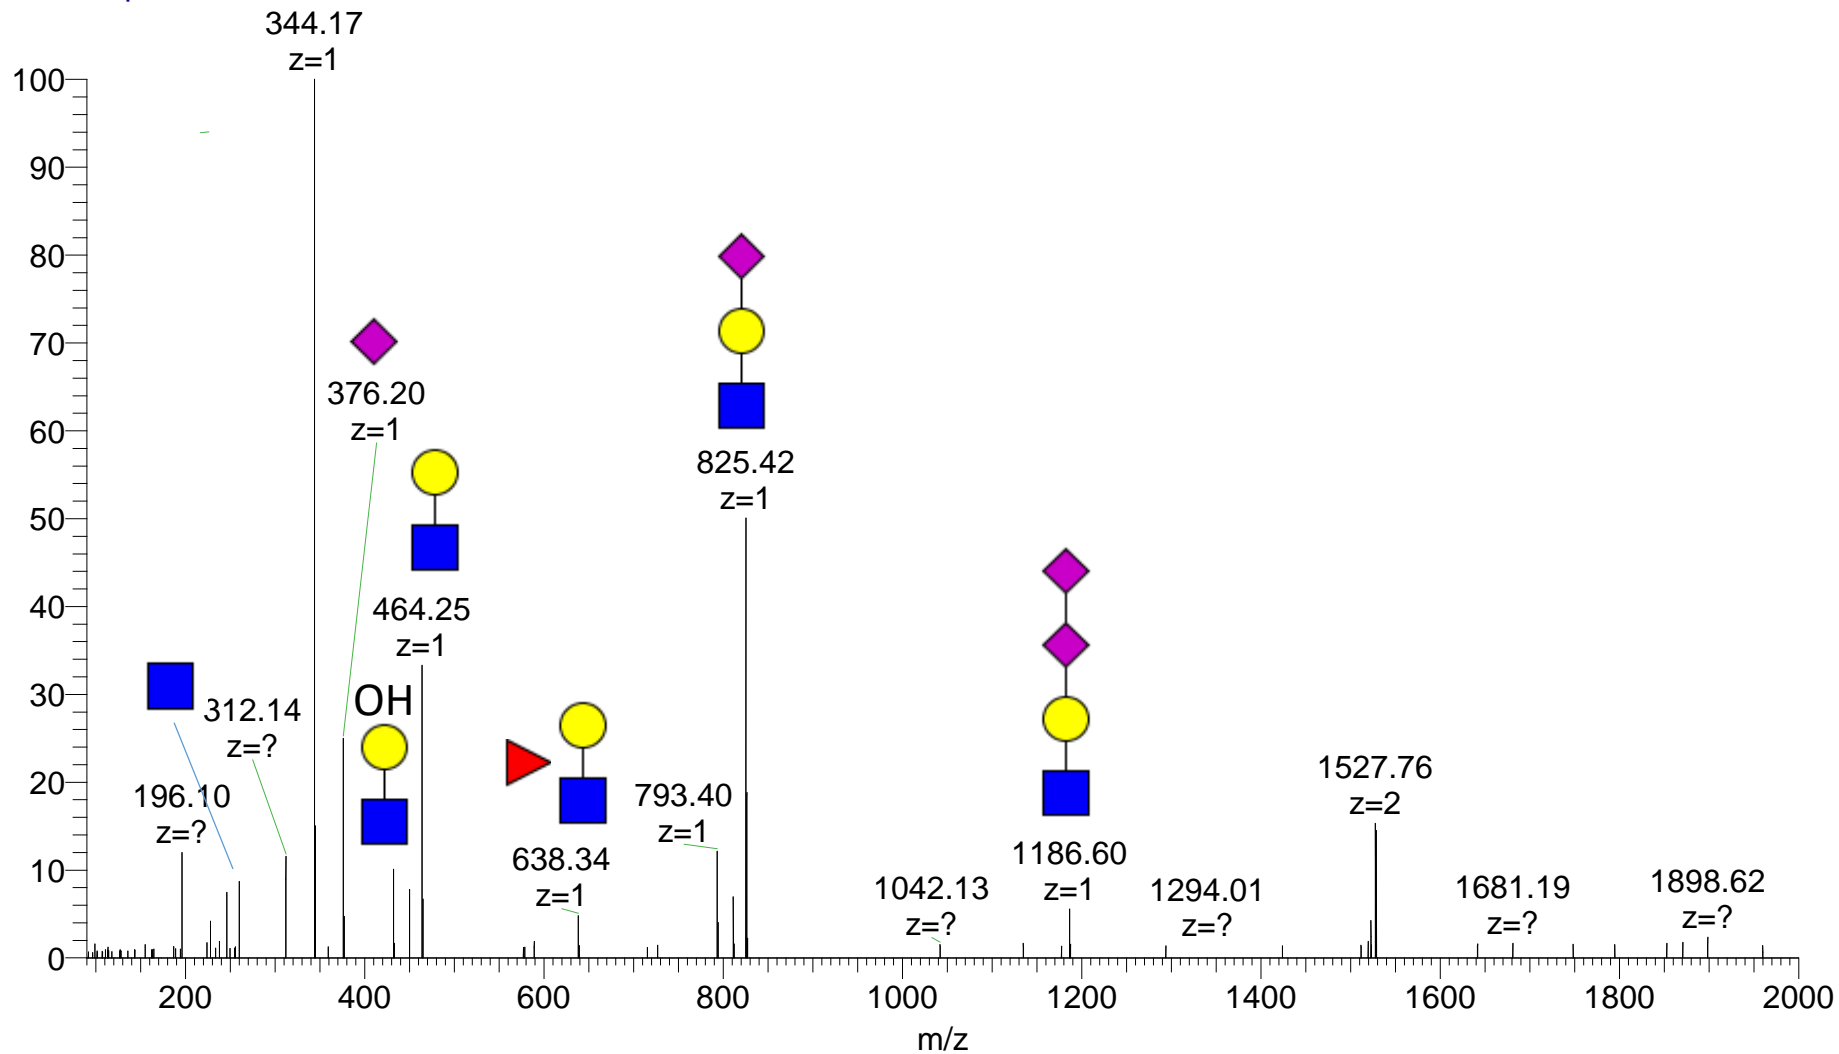

mbrain\_NG #22914 RT: 53.49 AV: 1 NL: 3.74E5  
T: FTMS + p NSI d Full ms2 1431.3947@hcd15.(

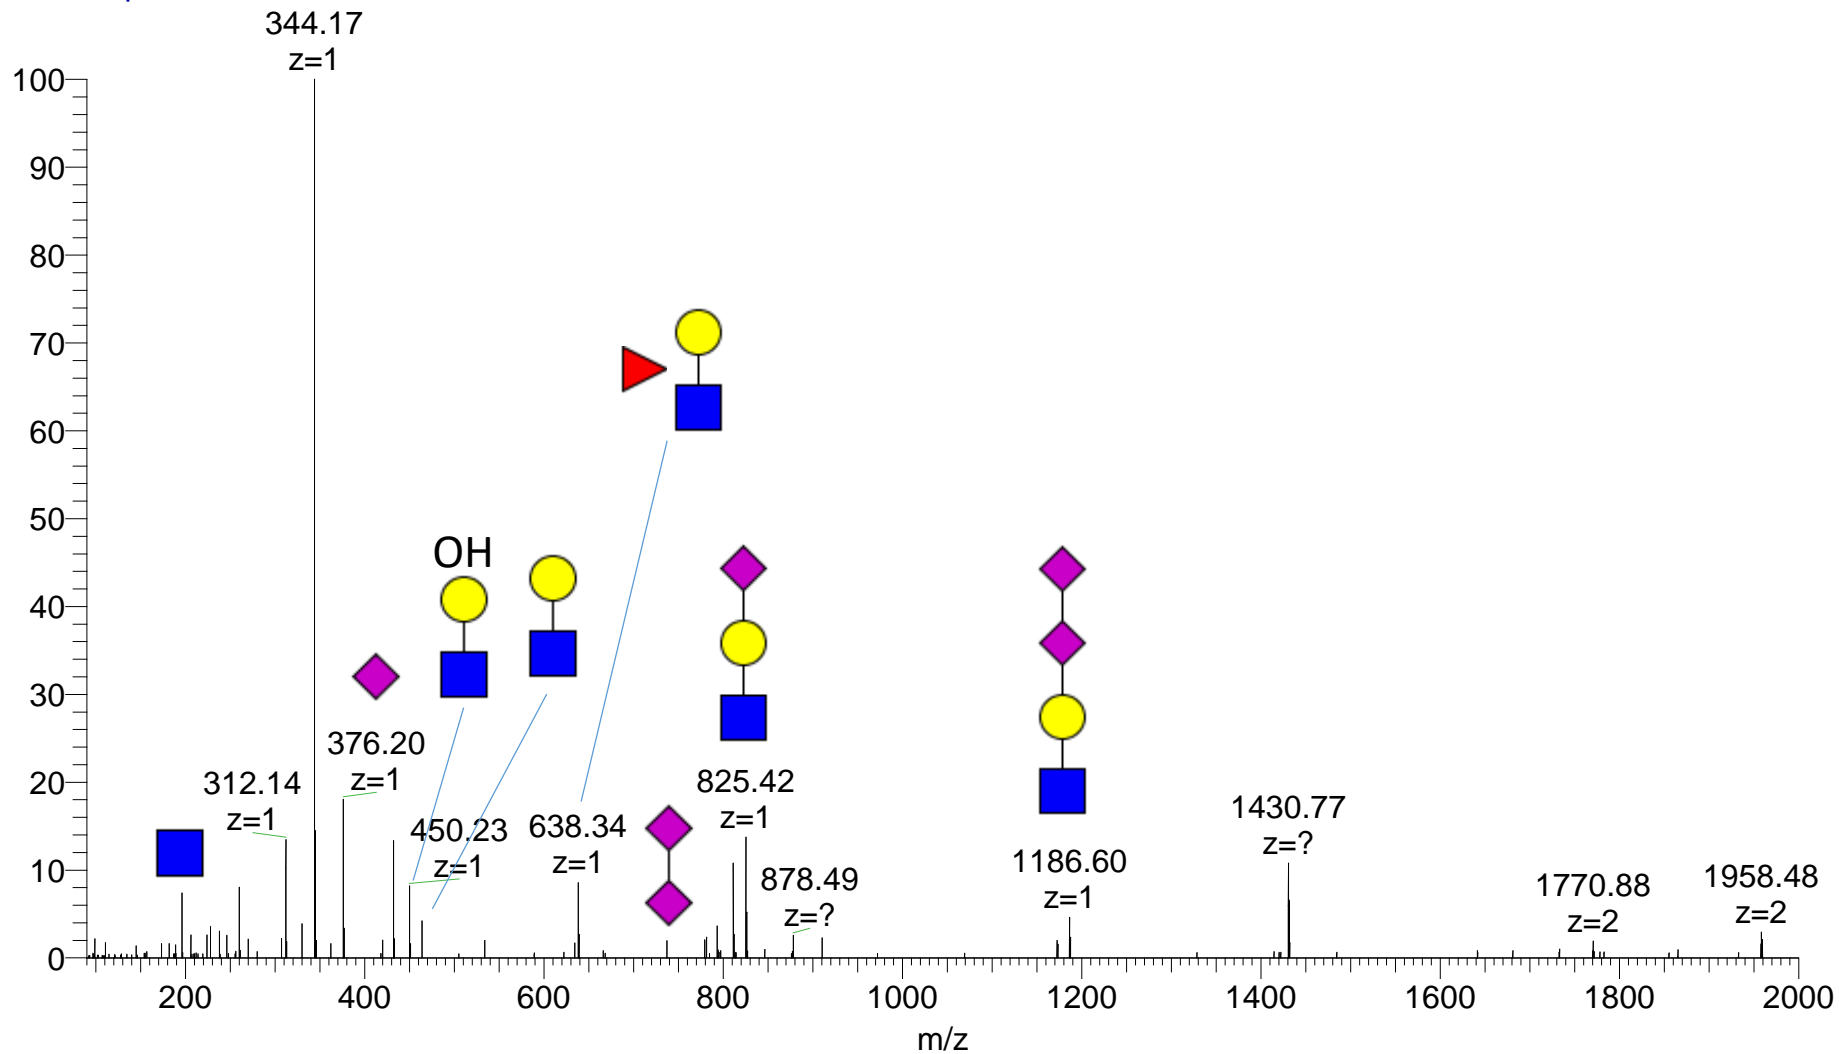



mbrain\_NG #23066 RT: 53.69 AV: 1 NL: 2.24E5  
T: FTMS + p NSI d Full ms2 1493.7550@hcd15.(

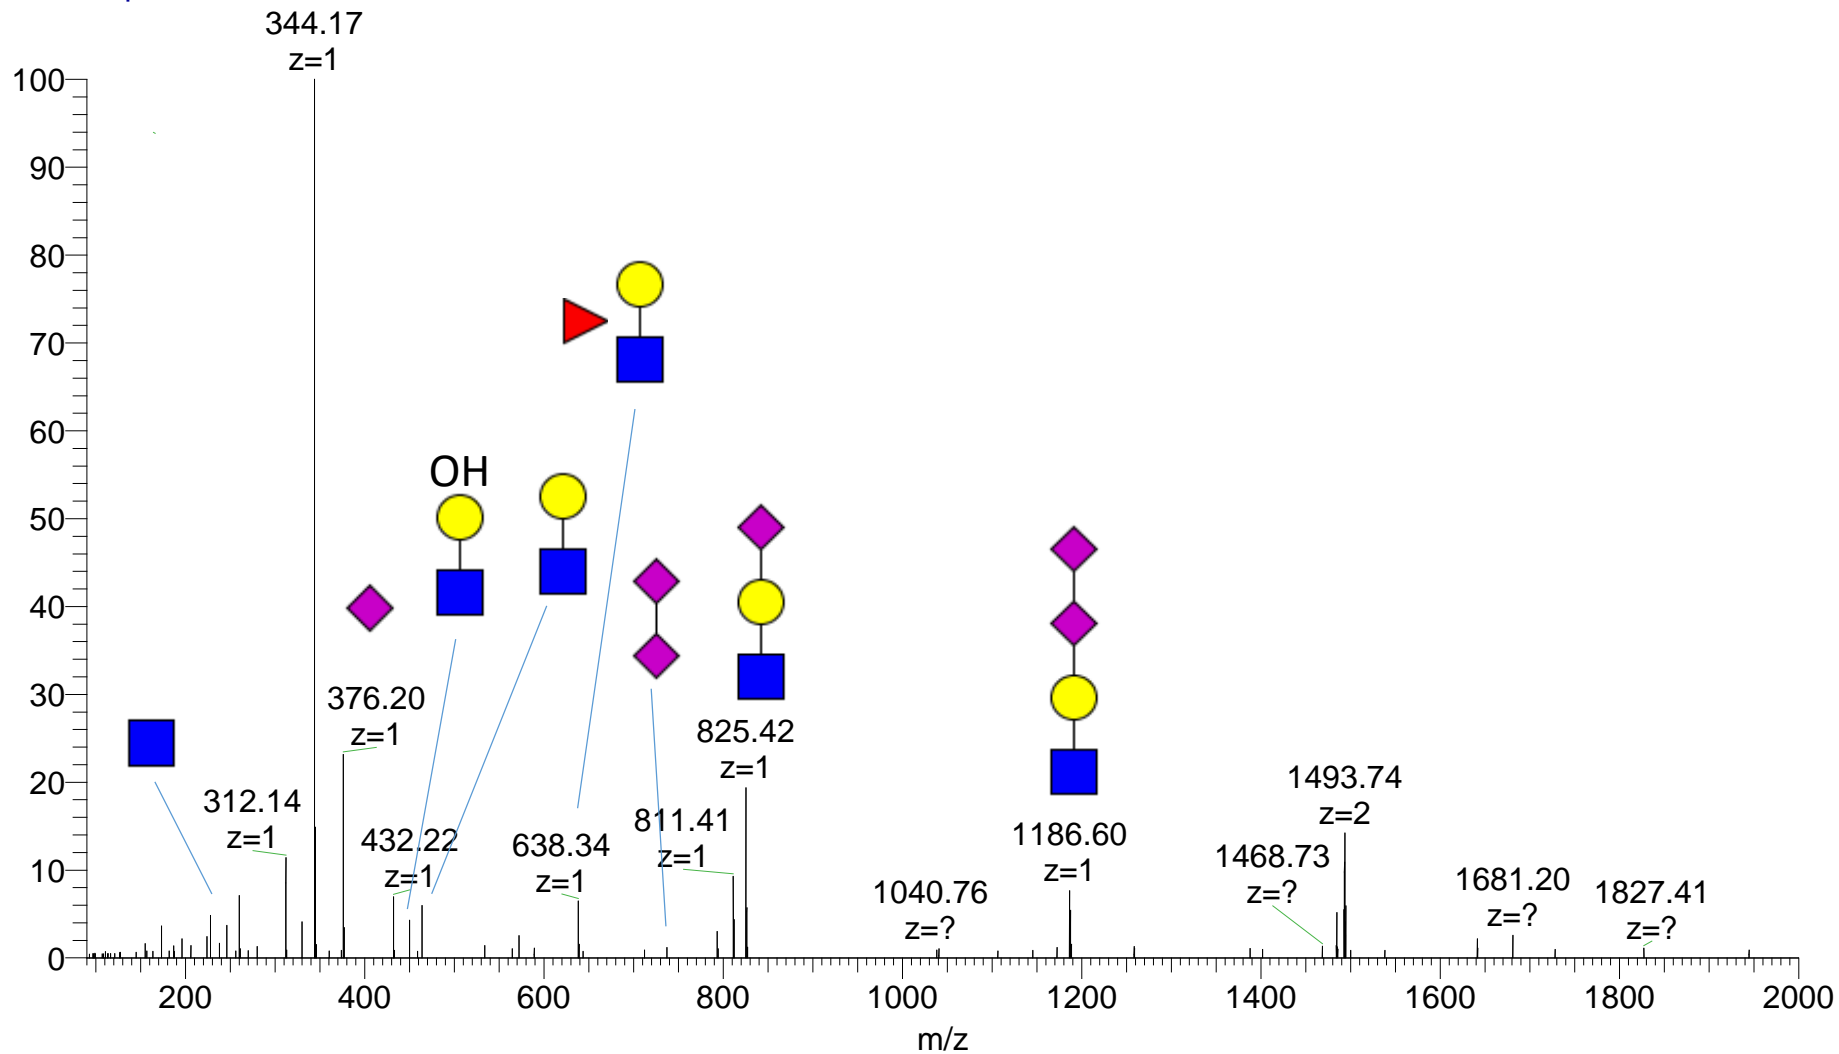

mbrain\_NG #23080 RT: 53.71 AV: 1 NL: 3.47E5  
T: FTMS + p NSI d Full ms2 1524.1121@hcd15.(

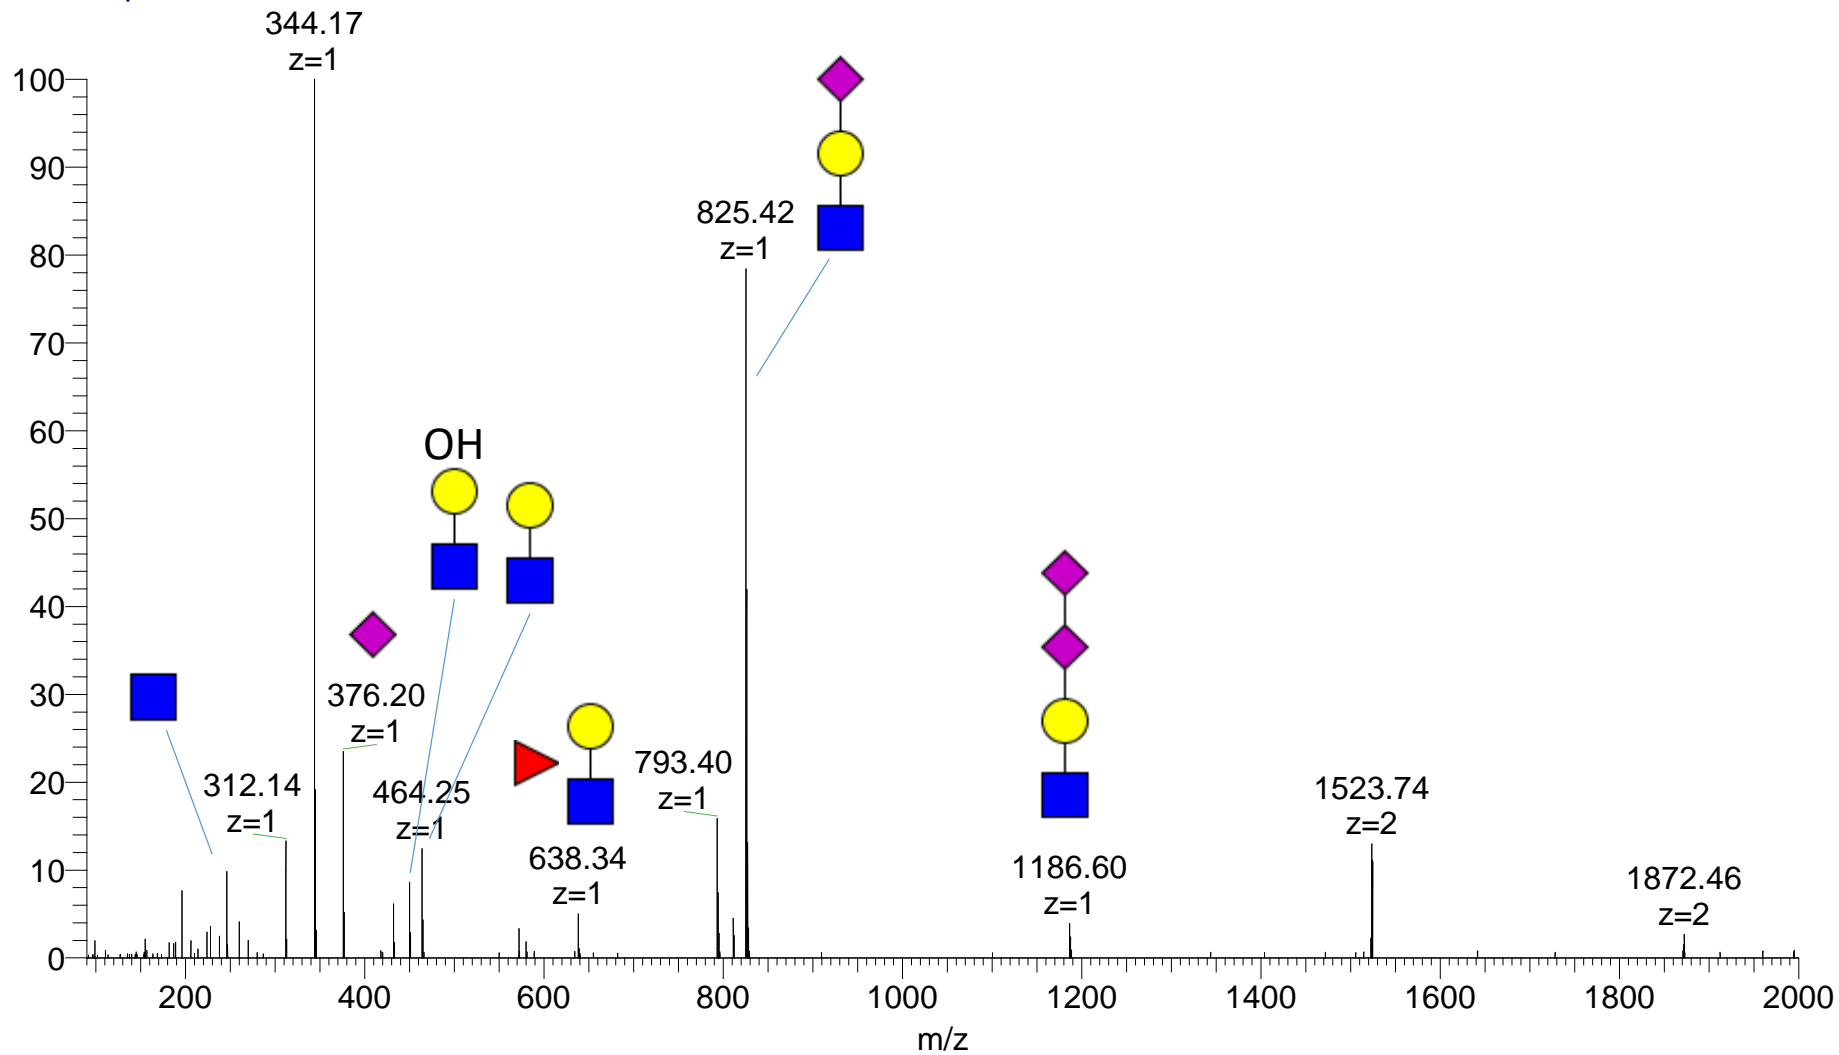

mbrain\_NG #23103 RT: 53.74 AV: 1 NL: 5.98E5  
T: FTMS + p NSI d Full ms2 1373.6968@hcd15.(

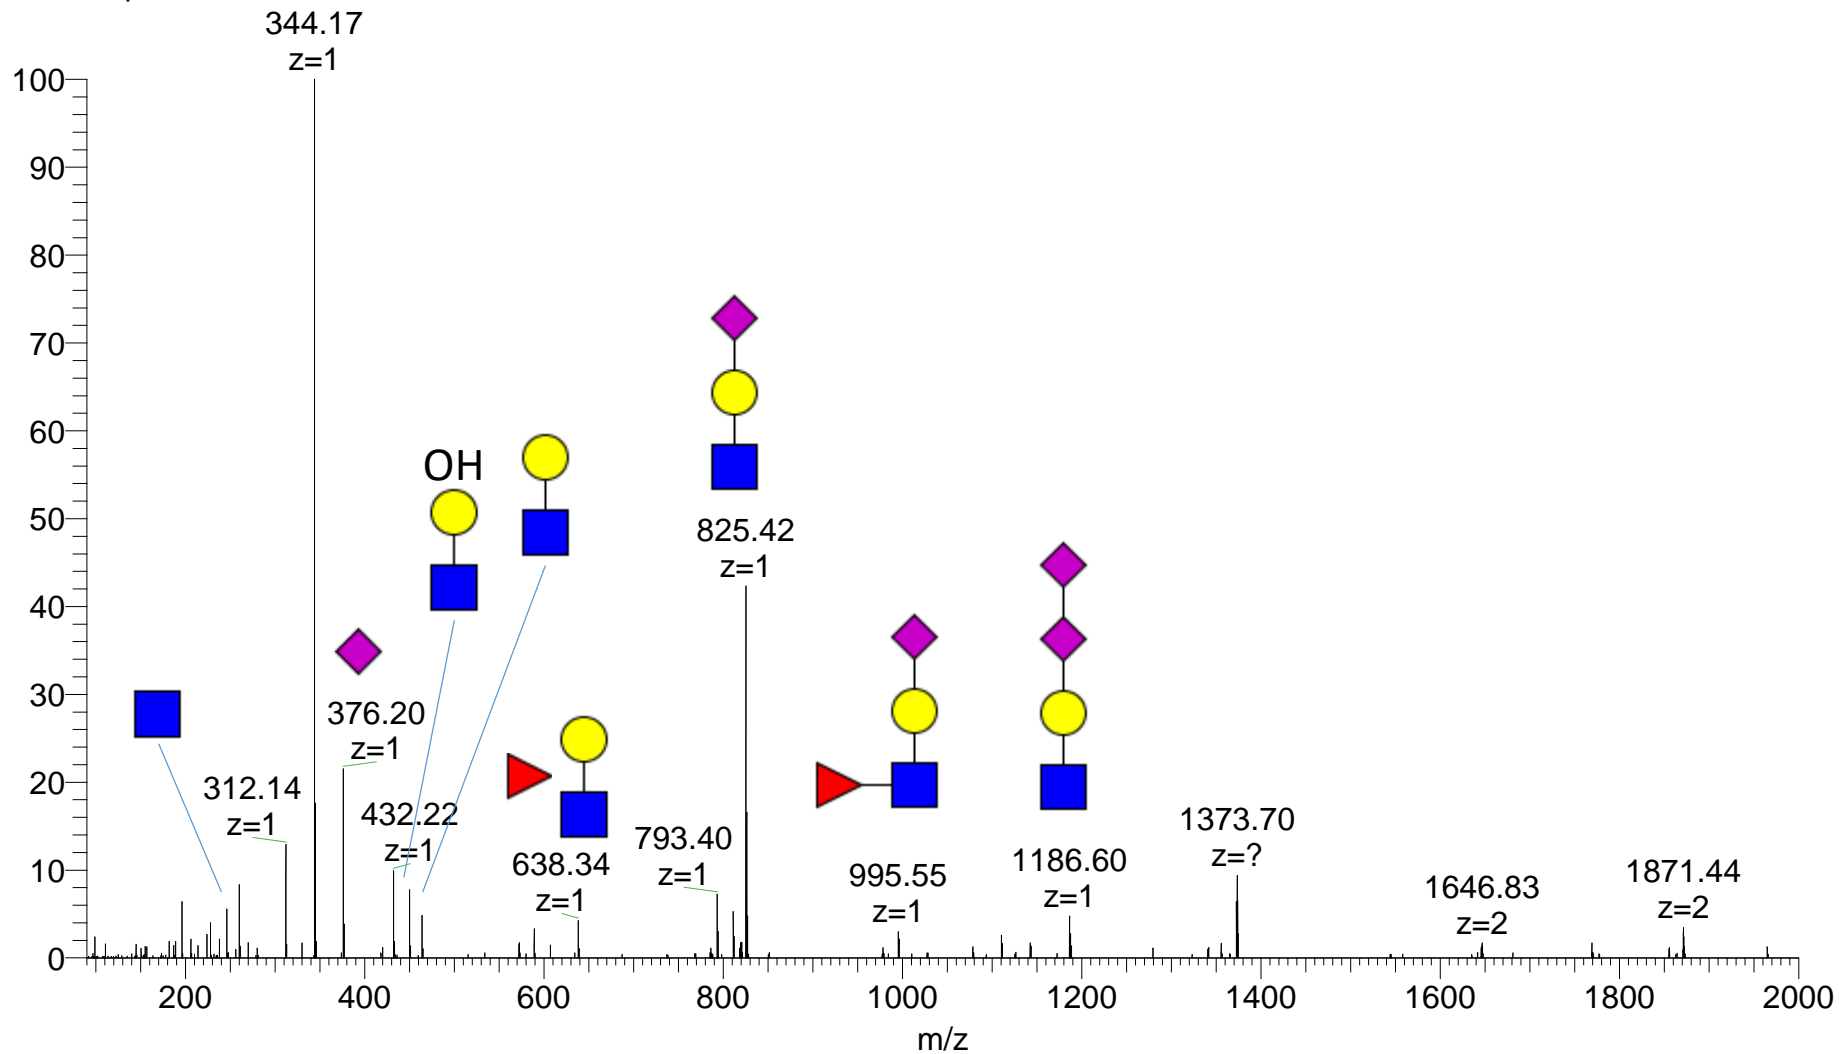

mbrain\_NG #23128 RT: 53.77 AV: 1 NL: 1.09E5  
T: FTMS + p NSI d Full ms2 1614.1503@hcd15.(

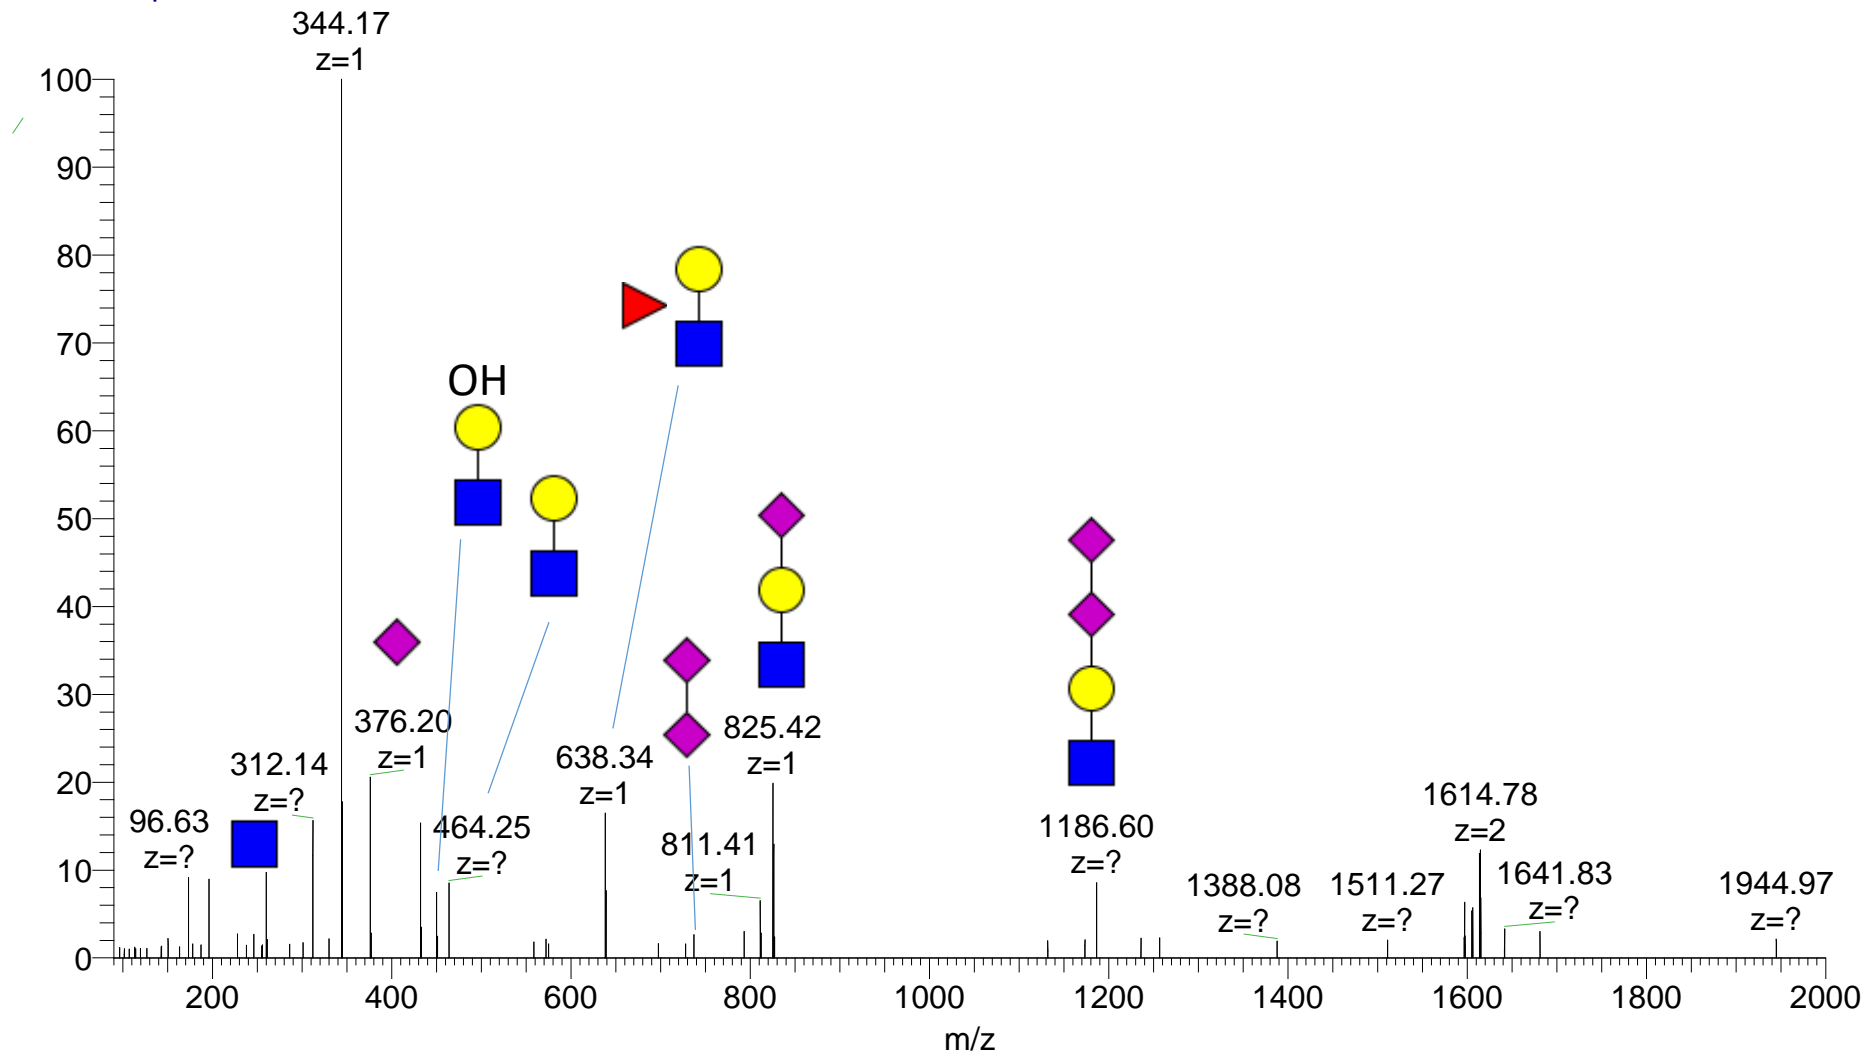

mbrain\_NG #23230 RT: 53.91 AV: 1 NL: 2.83E5  
T: FTMS + p NSI d Full ms2 1460.7469@hcd15.(

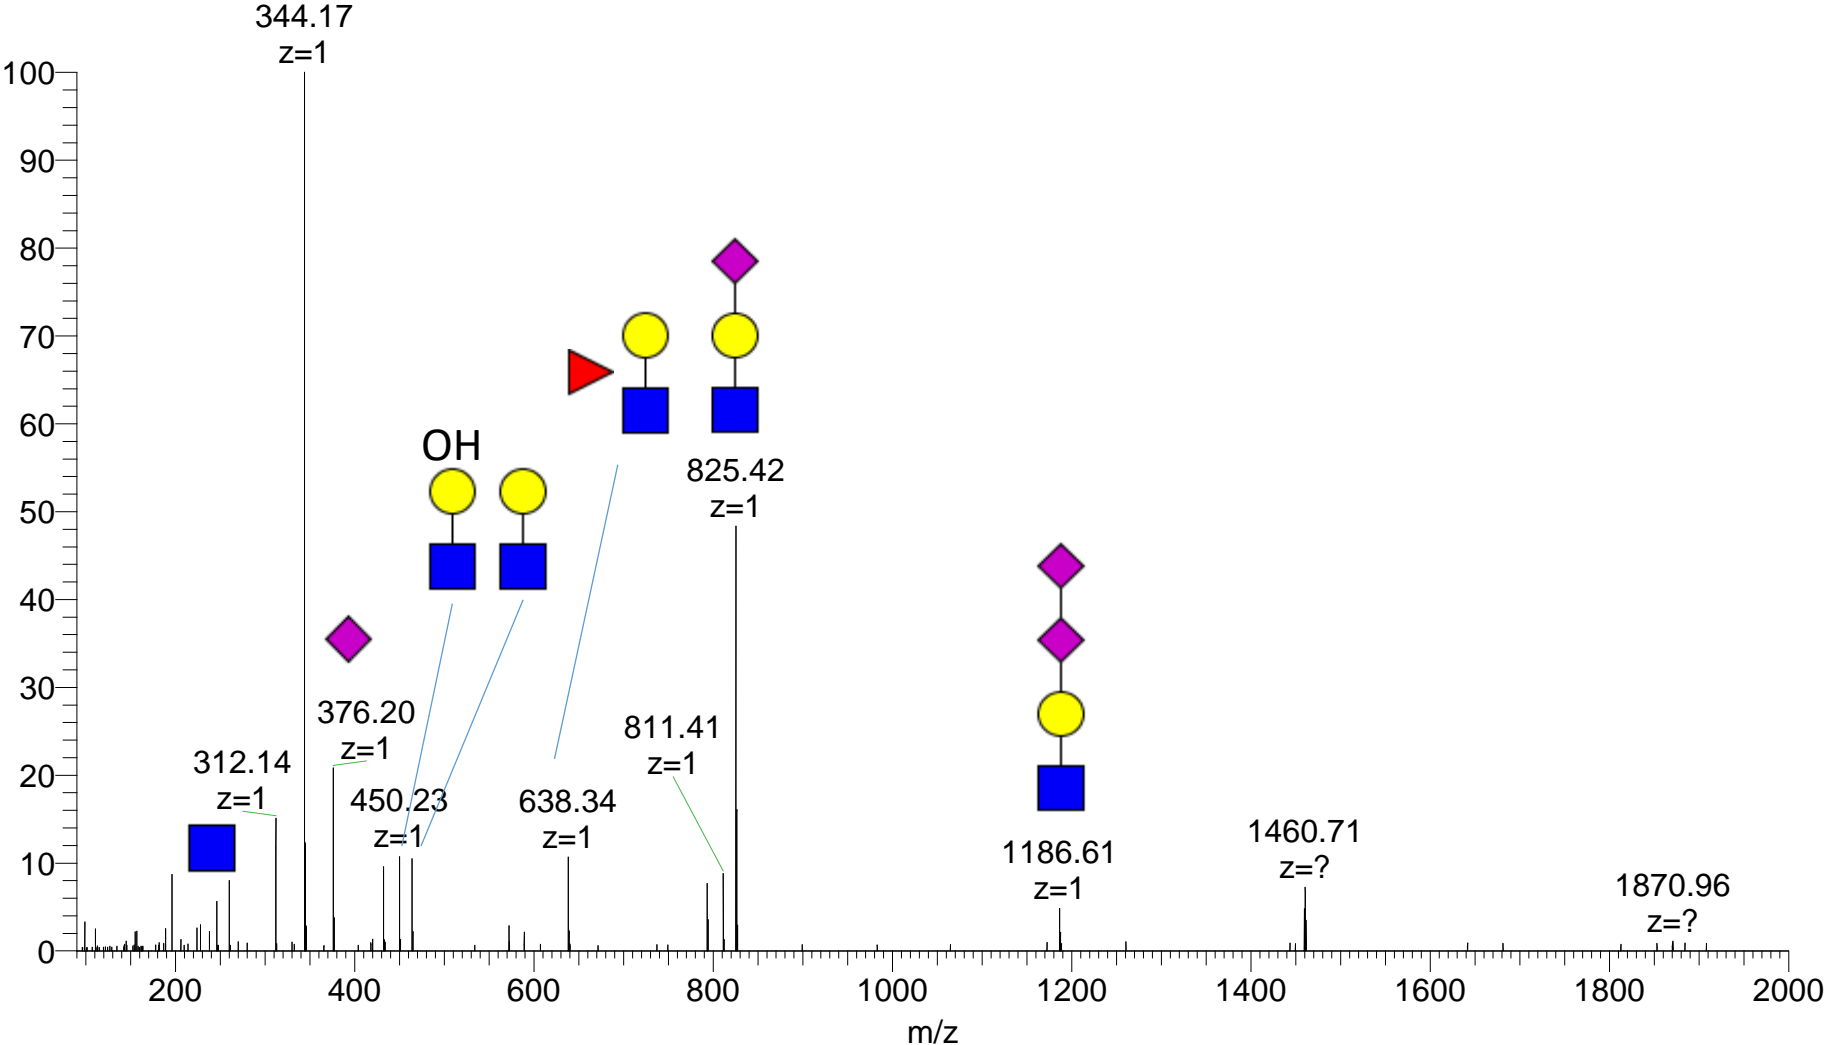

mbrain\_NG #23286 RT: 53.99 AV: 1 NL: 7.30E5  
T: FTMS + p NSI d Full ms2 1523.1074@hcd15.(

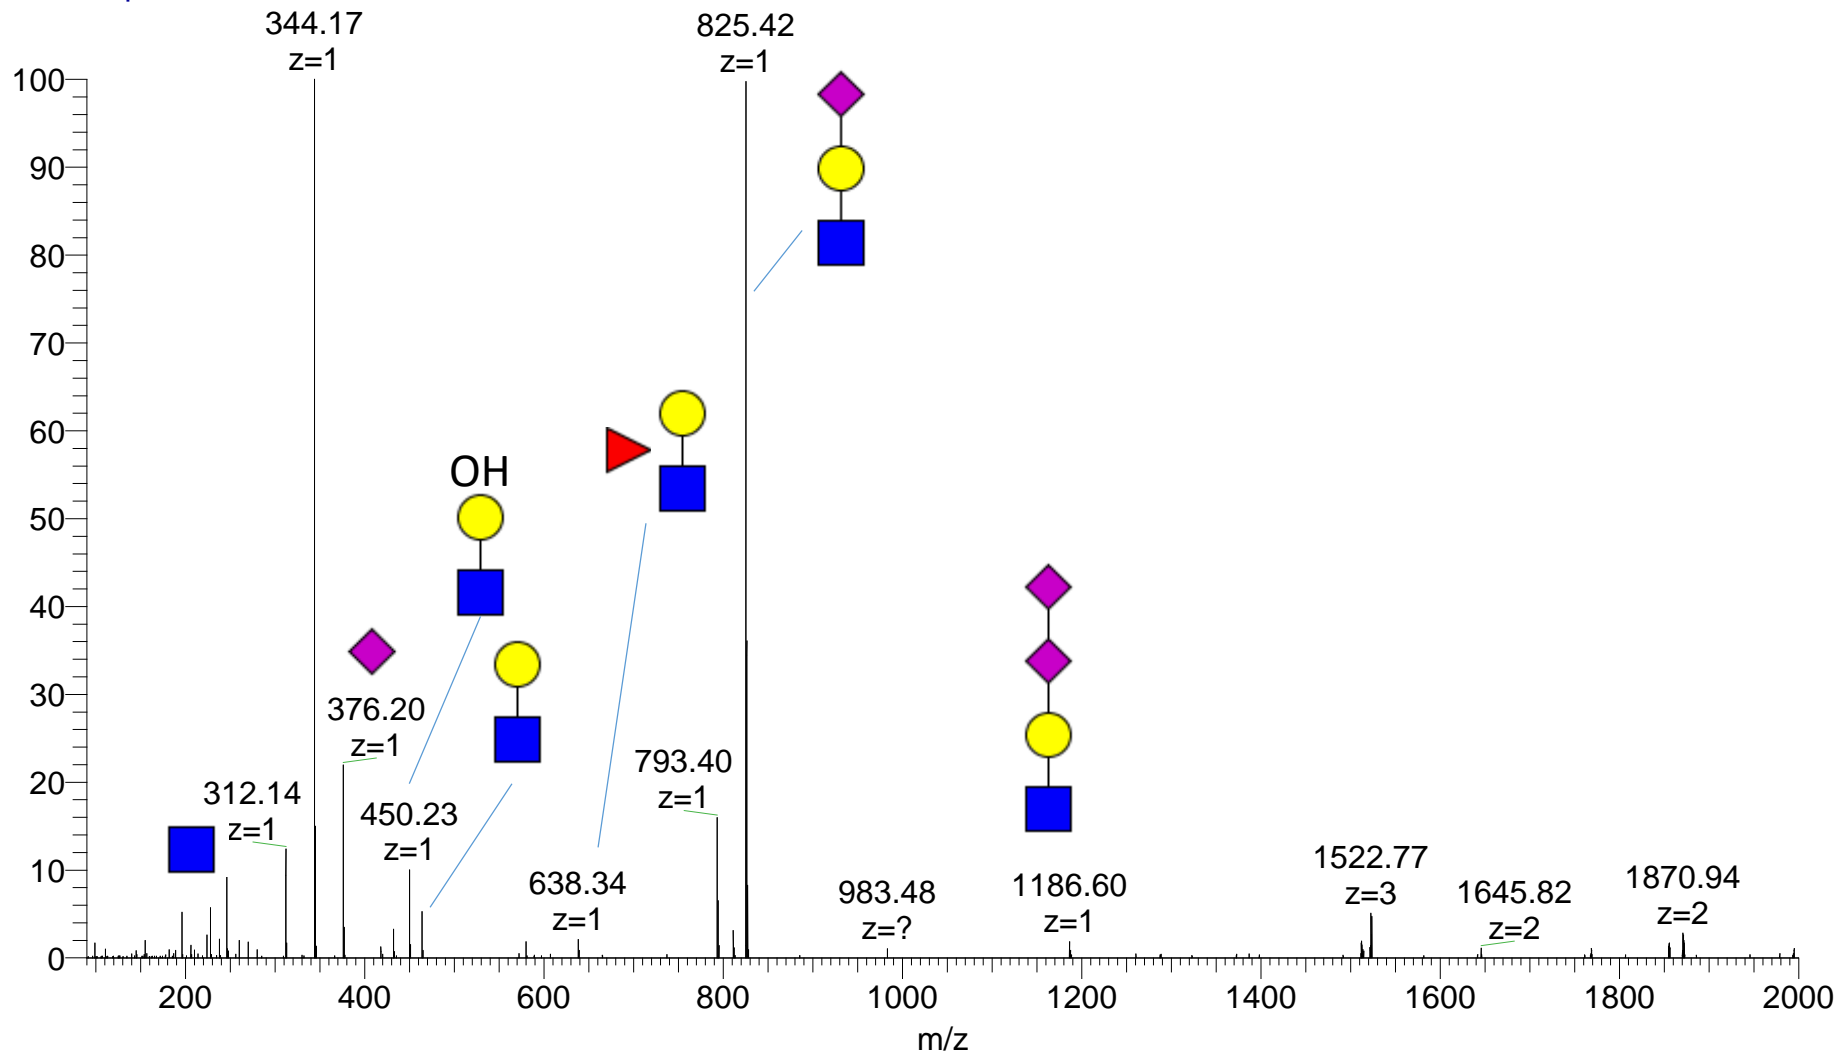

mbrain\_NG #23559 RT: 54.35 AV: 1 NL: 1.72E5

T: FTMS + p NSI d Full ms2 1473.7522@hcd15.(

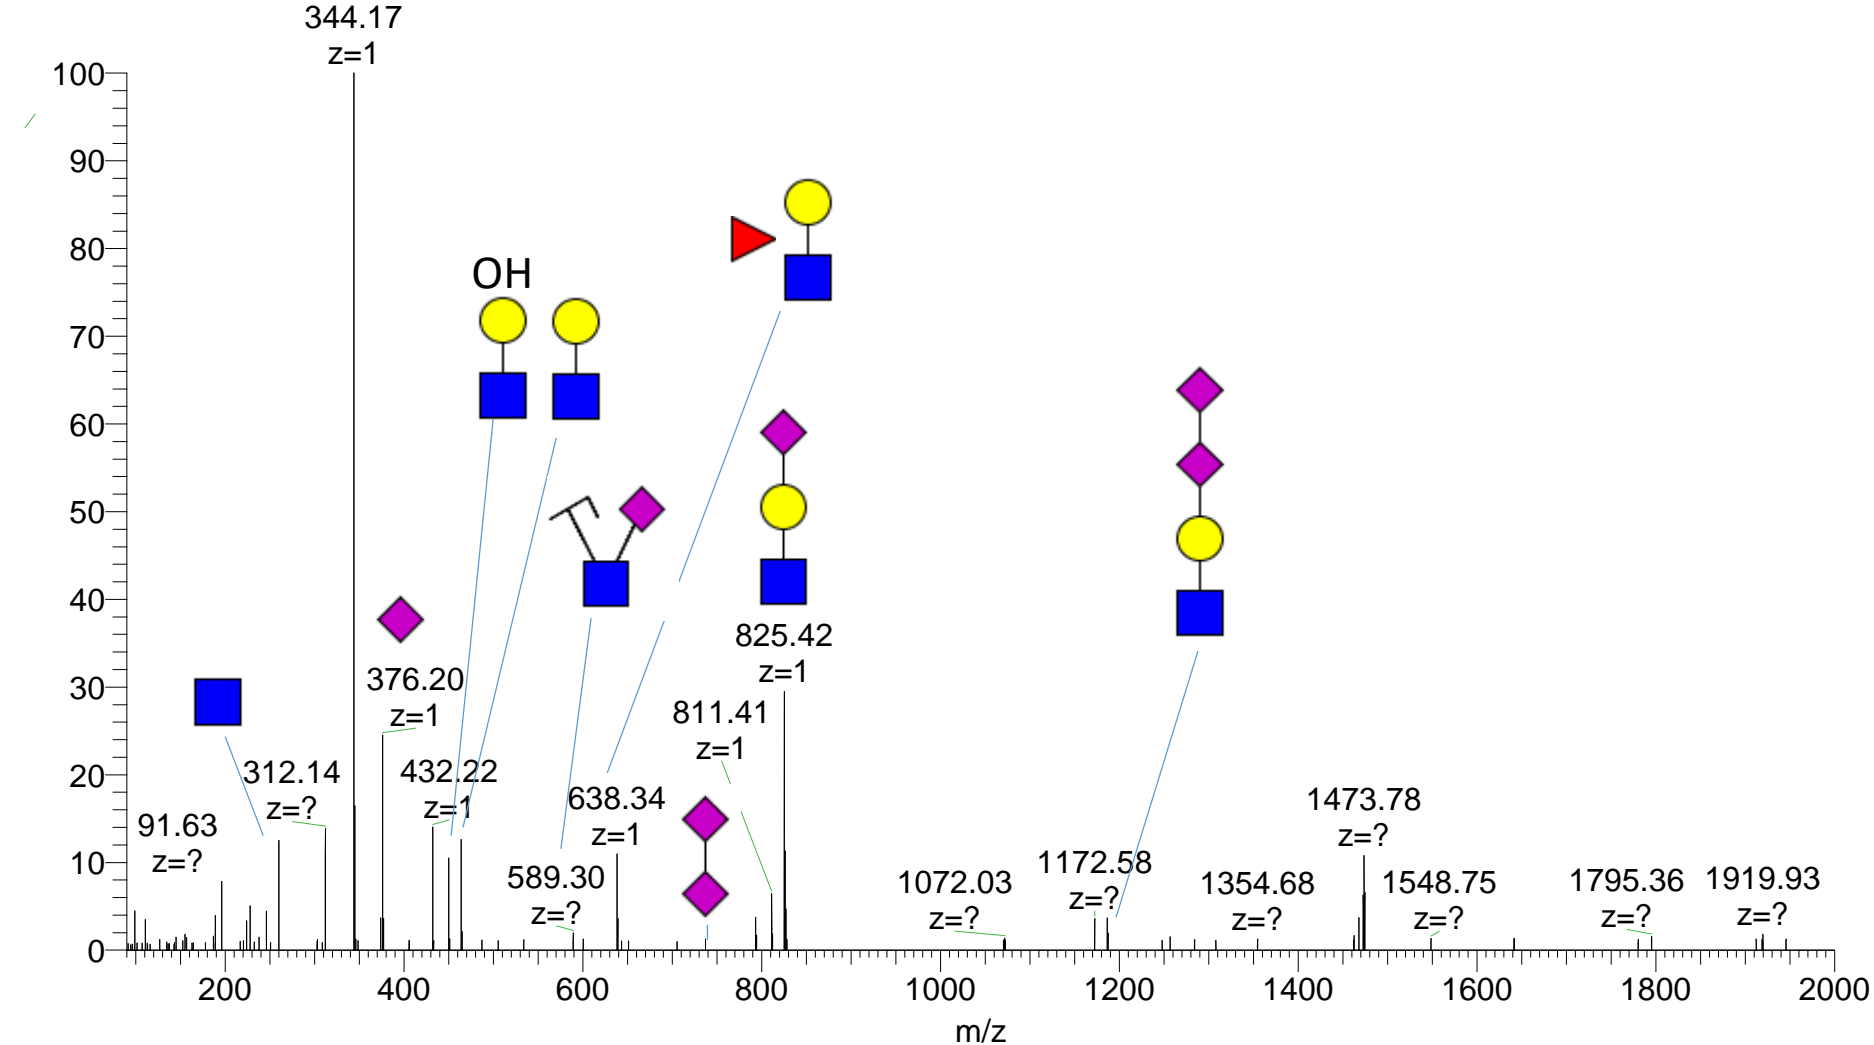

mbrain\_NG #23649 RT: 54.47 AV: 1 NL: 1.59E5

T: FTMS + p NSI d Full ms2 1537.7925@hcd15.(

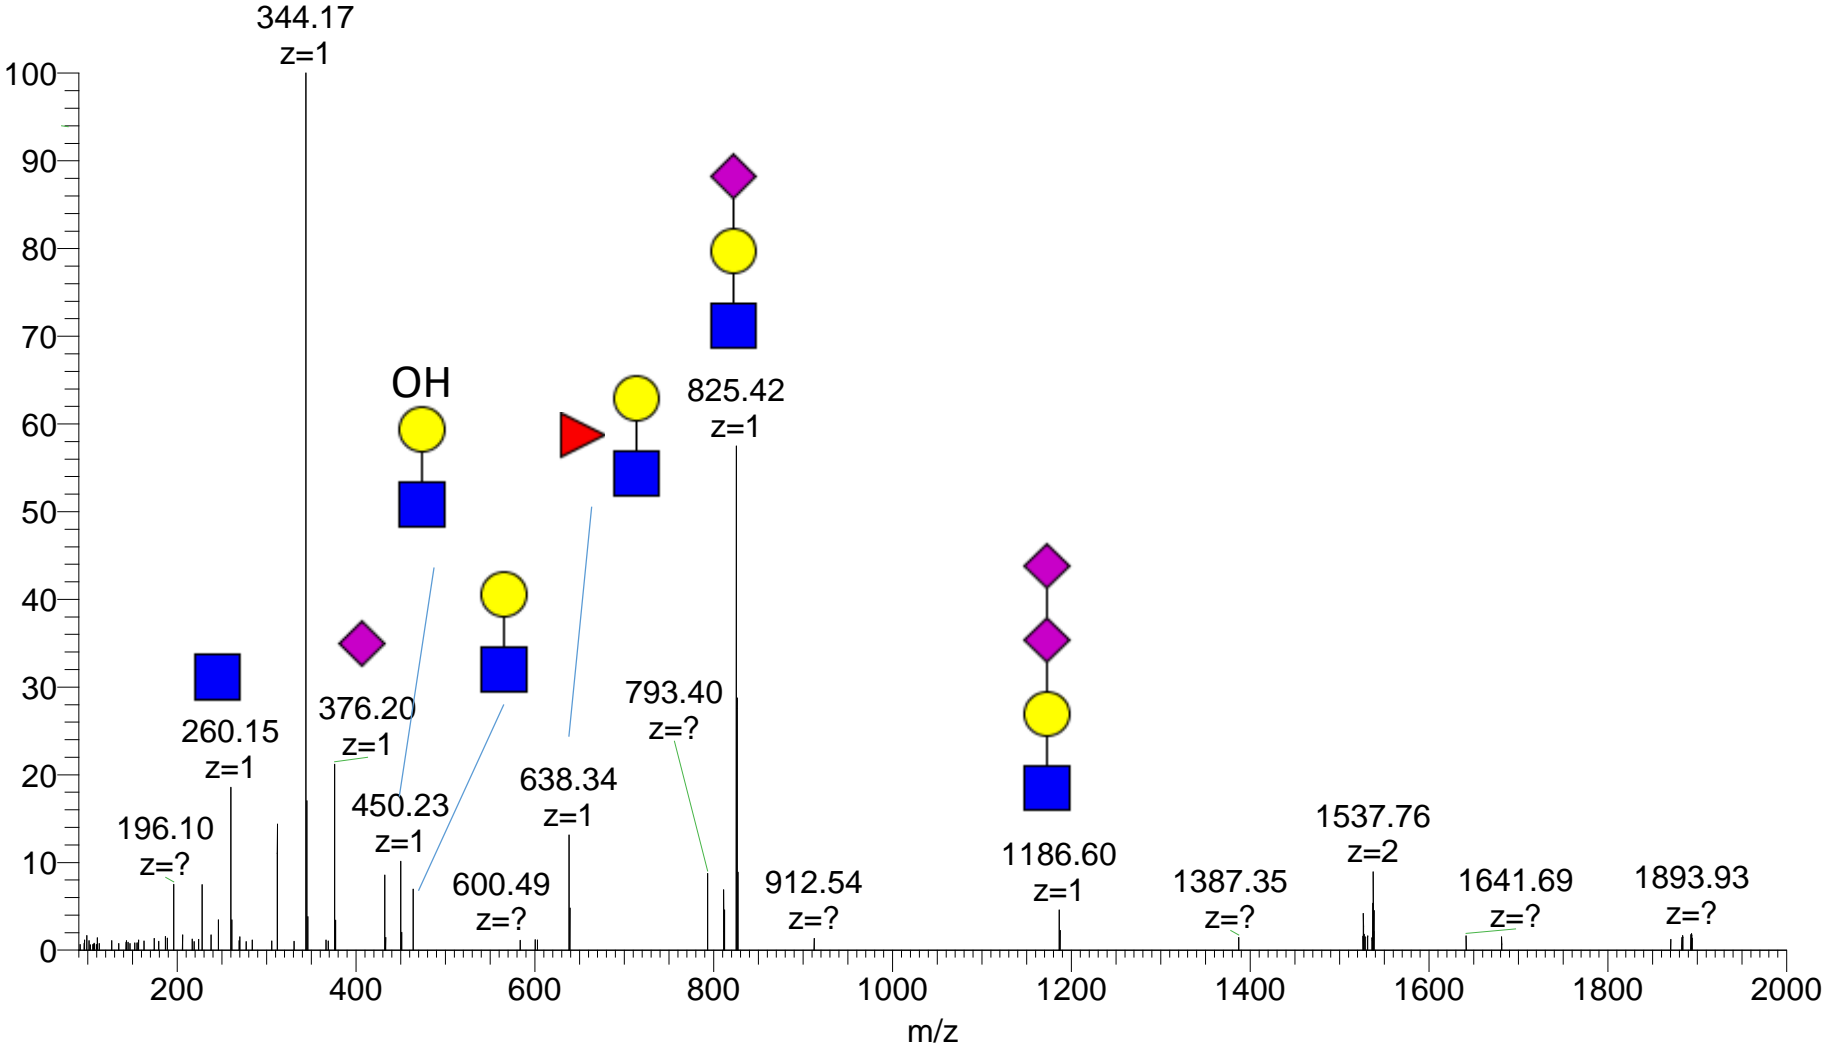



mbrain\_NG #23661 RT: 54.50 AV: 1 NL: 2.75E6

T: FTMS + p NSI d Full ms2 1186.1053@hcd15.(

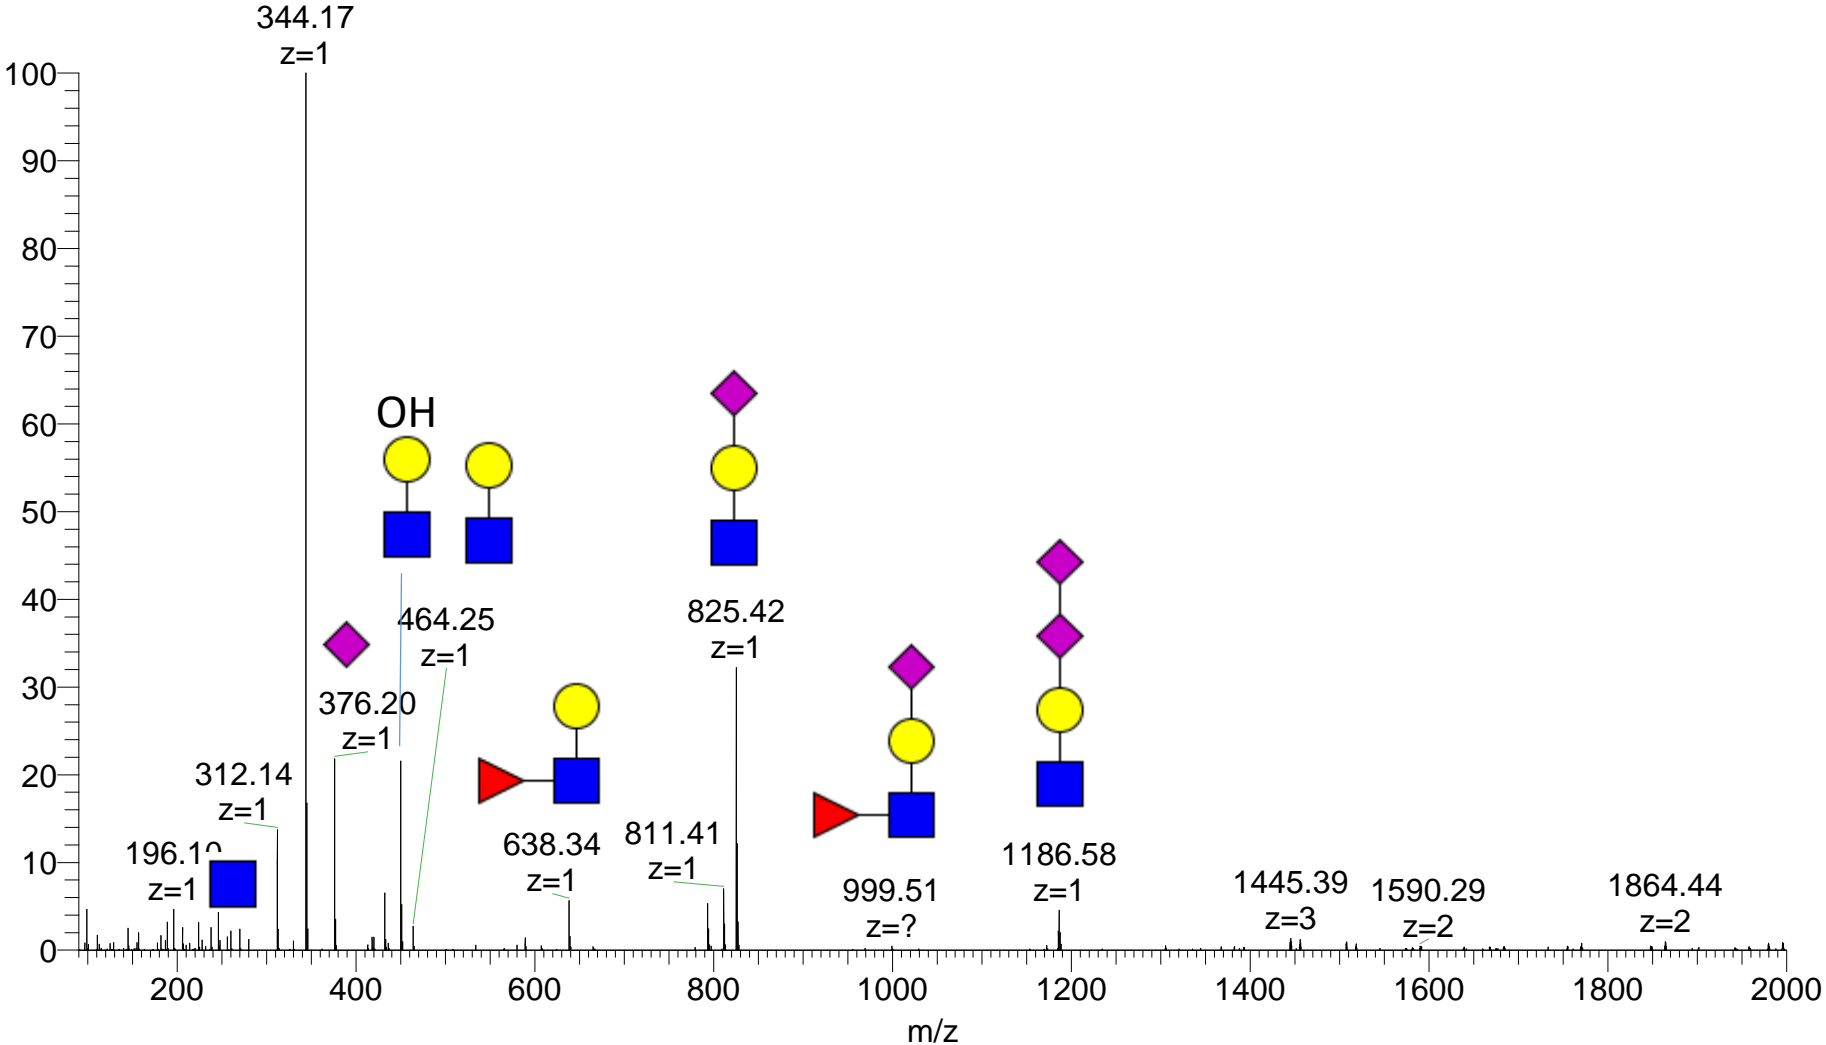

mbrain\_NG #23807 RT: 54.68 AV: 1 NL: 2.74E5

T: FTMS + p NSI d Full ms2 1378.3698@hcd15.(

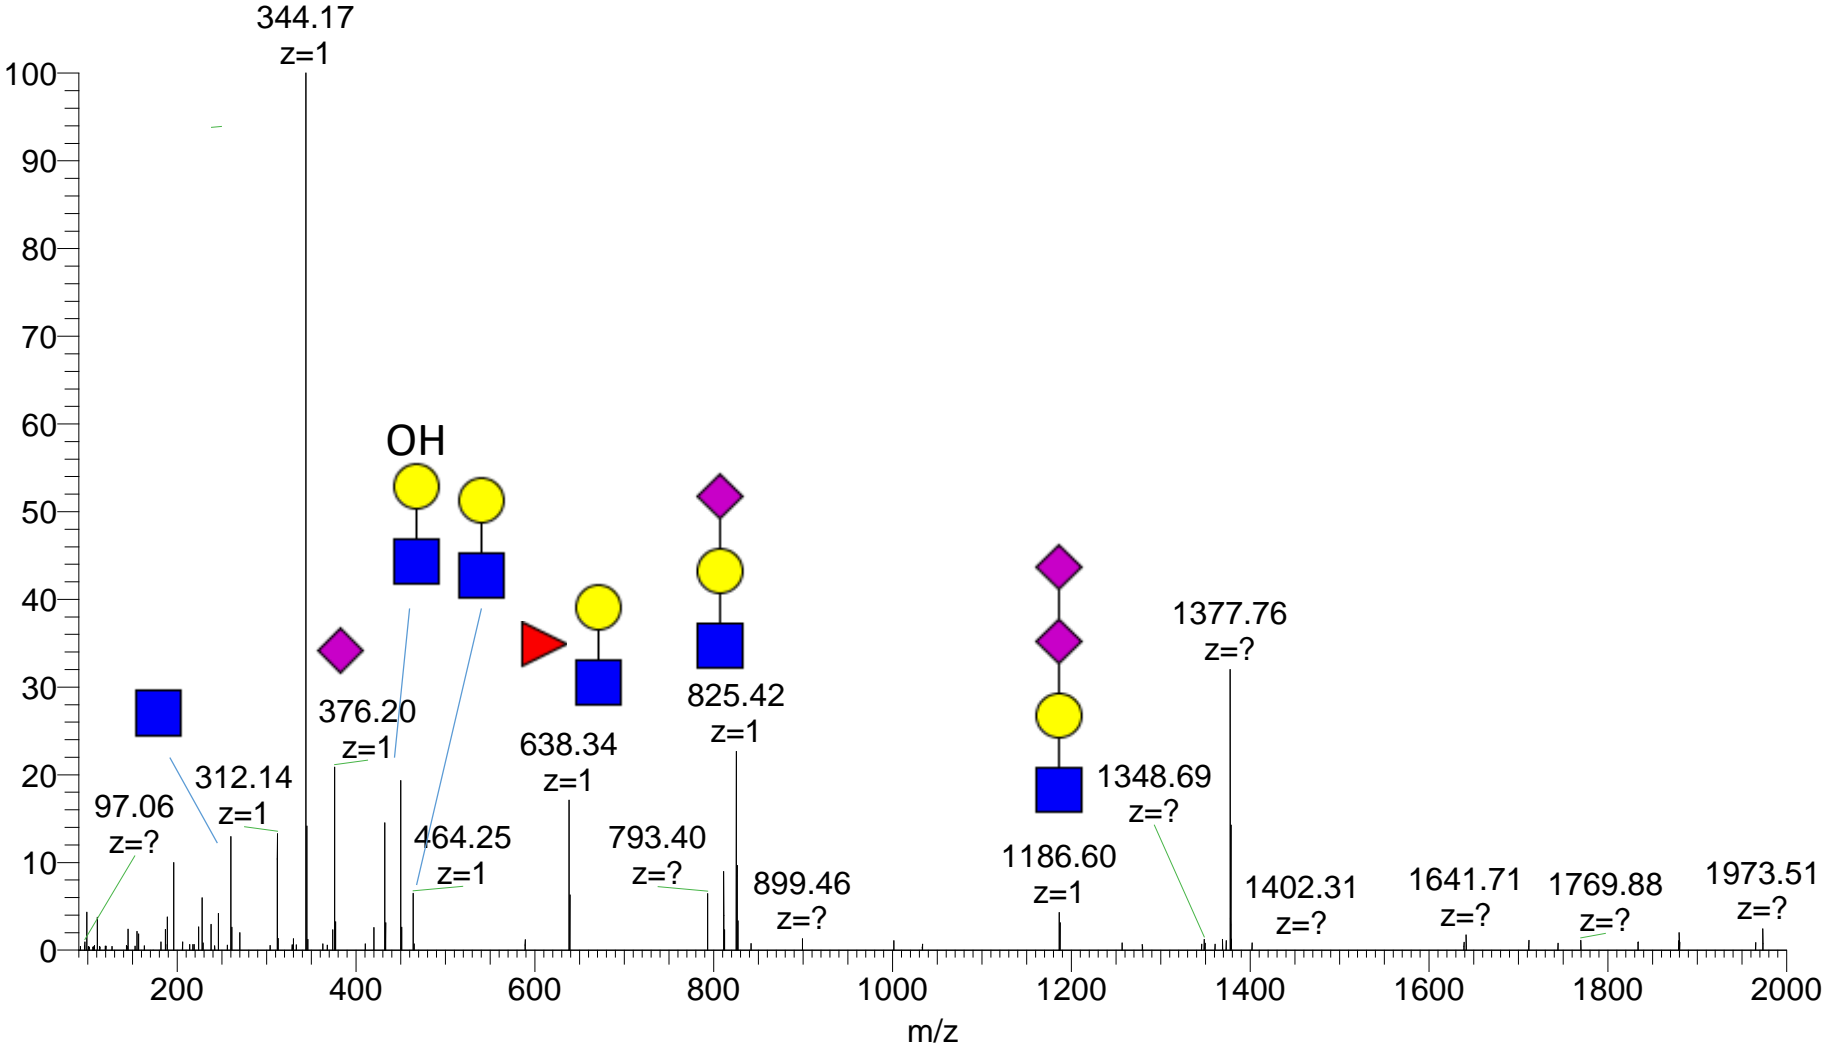

mbrain\_NG #23997 RT: 54.94 AV: 1 NL: 2.71E6  
T: FTMS + p NSI d Full ms2 1233.1272@hcd15.(

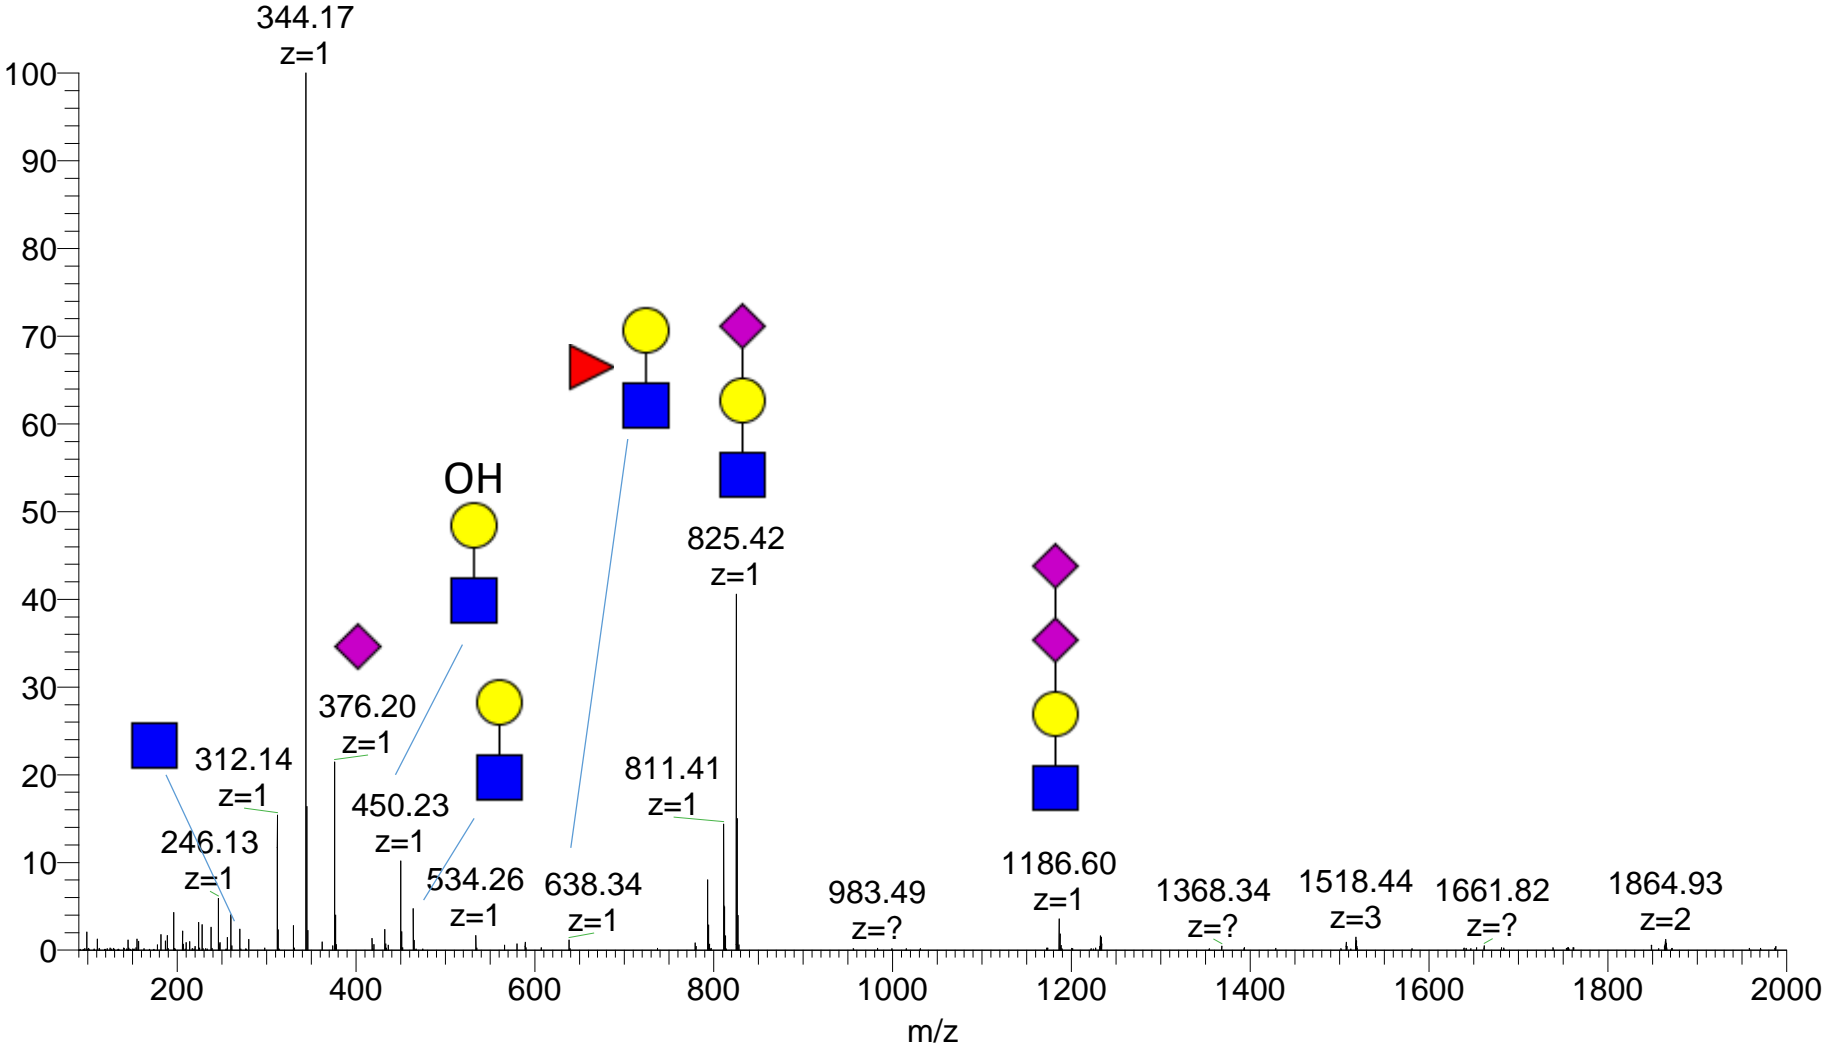

mbrain\_NG #24097 RT: 55.06 AV: 1 NL: 2.32E5  
T: FTMS + p NSI d Full ms2 1386.6976@hcd15.(

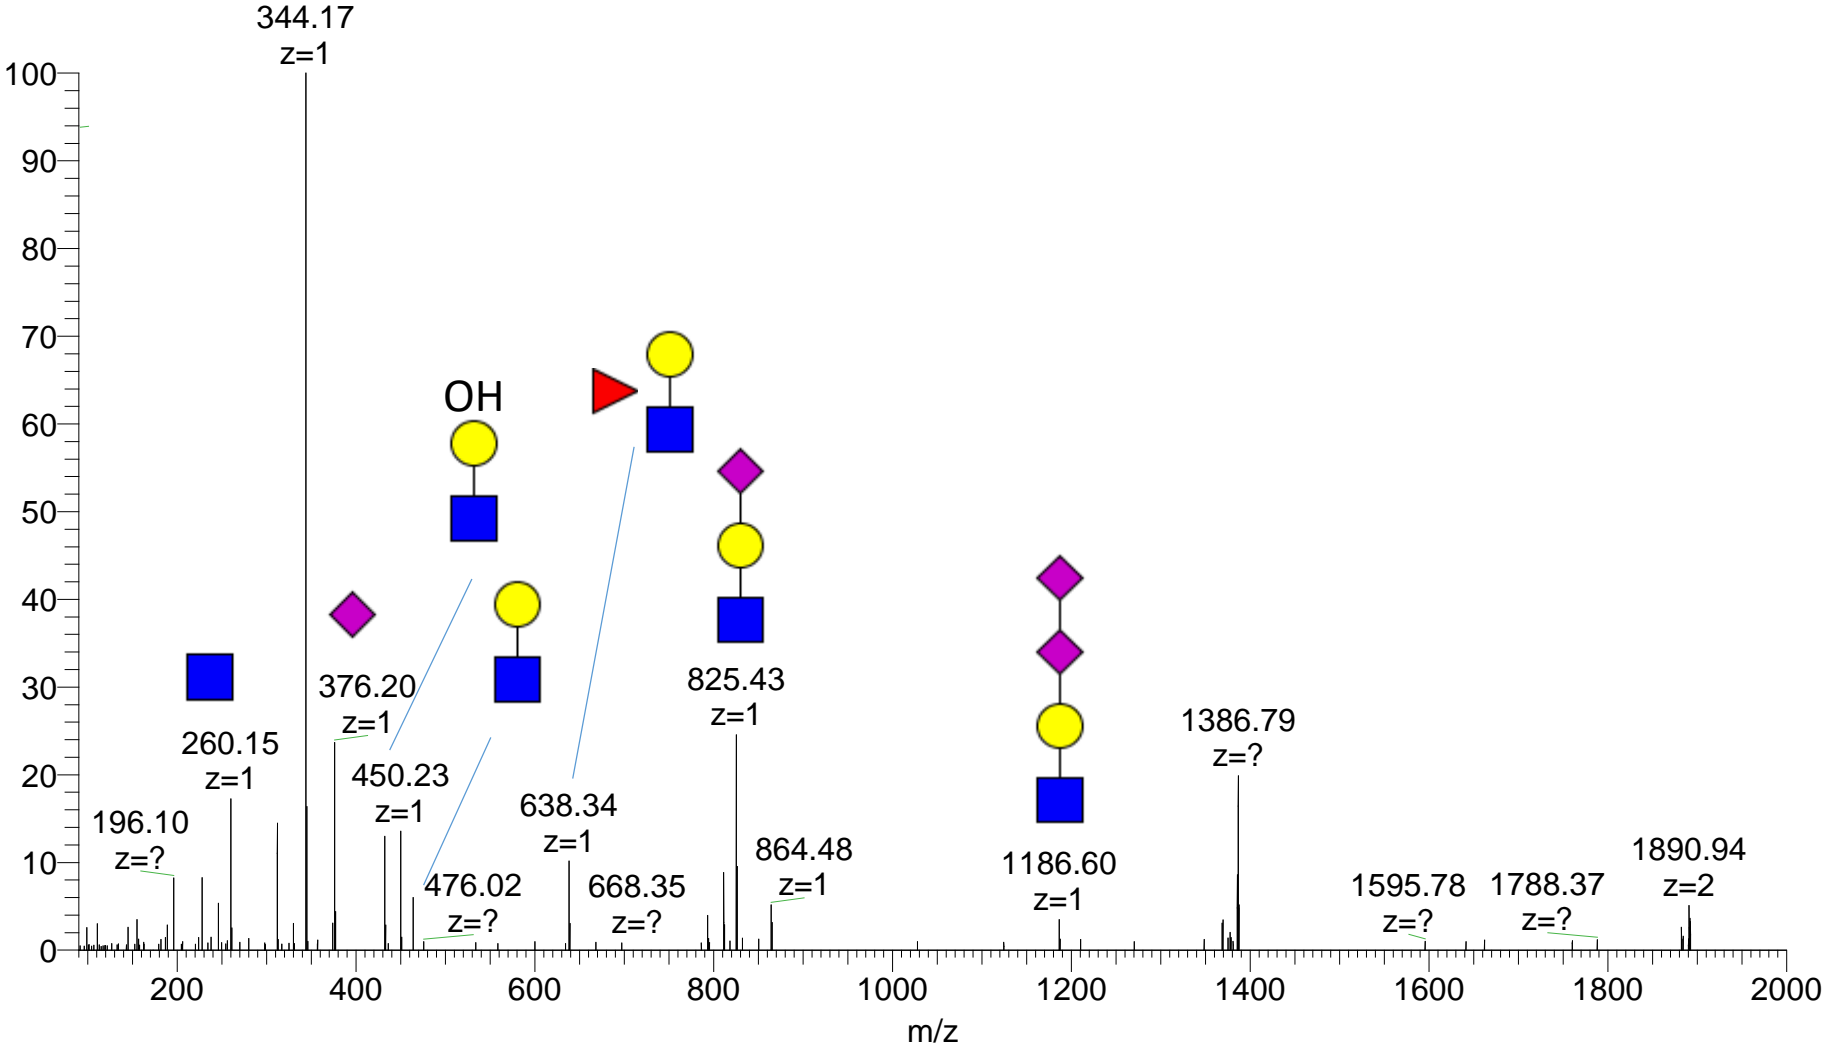

mbrain\_NG #24435 RT: 55.52 AV: 1 NL: 1.98E5  
T: FTMS + p NSI d Full ms2 1387.7058@hcd15.(

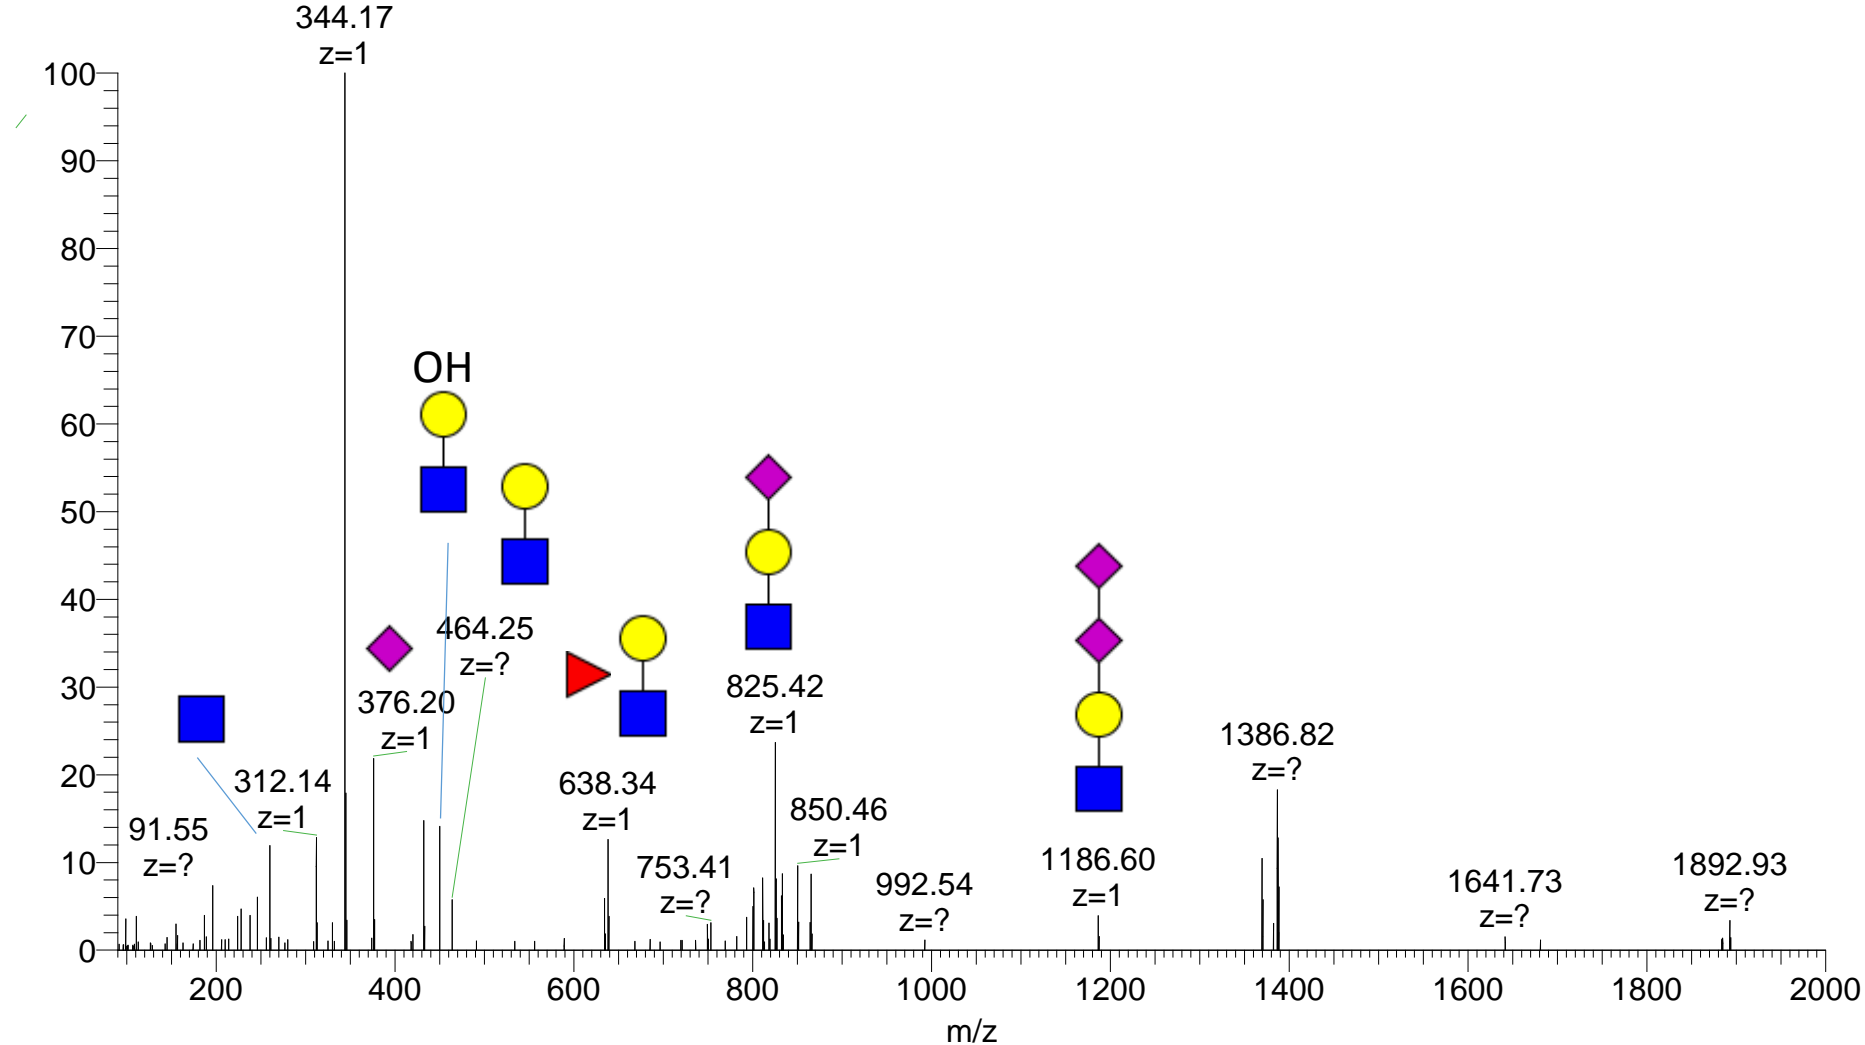

mbrain\_NG #24437 RT: 55.52 AV: 1 NL: 1.99E5  
T: FTMS + p NSI d Full ms2 1513.4379@hcd15.(

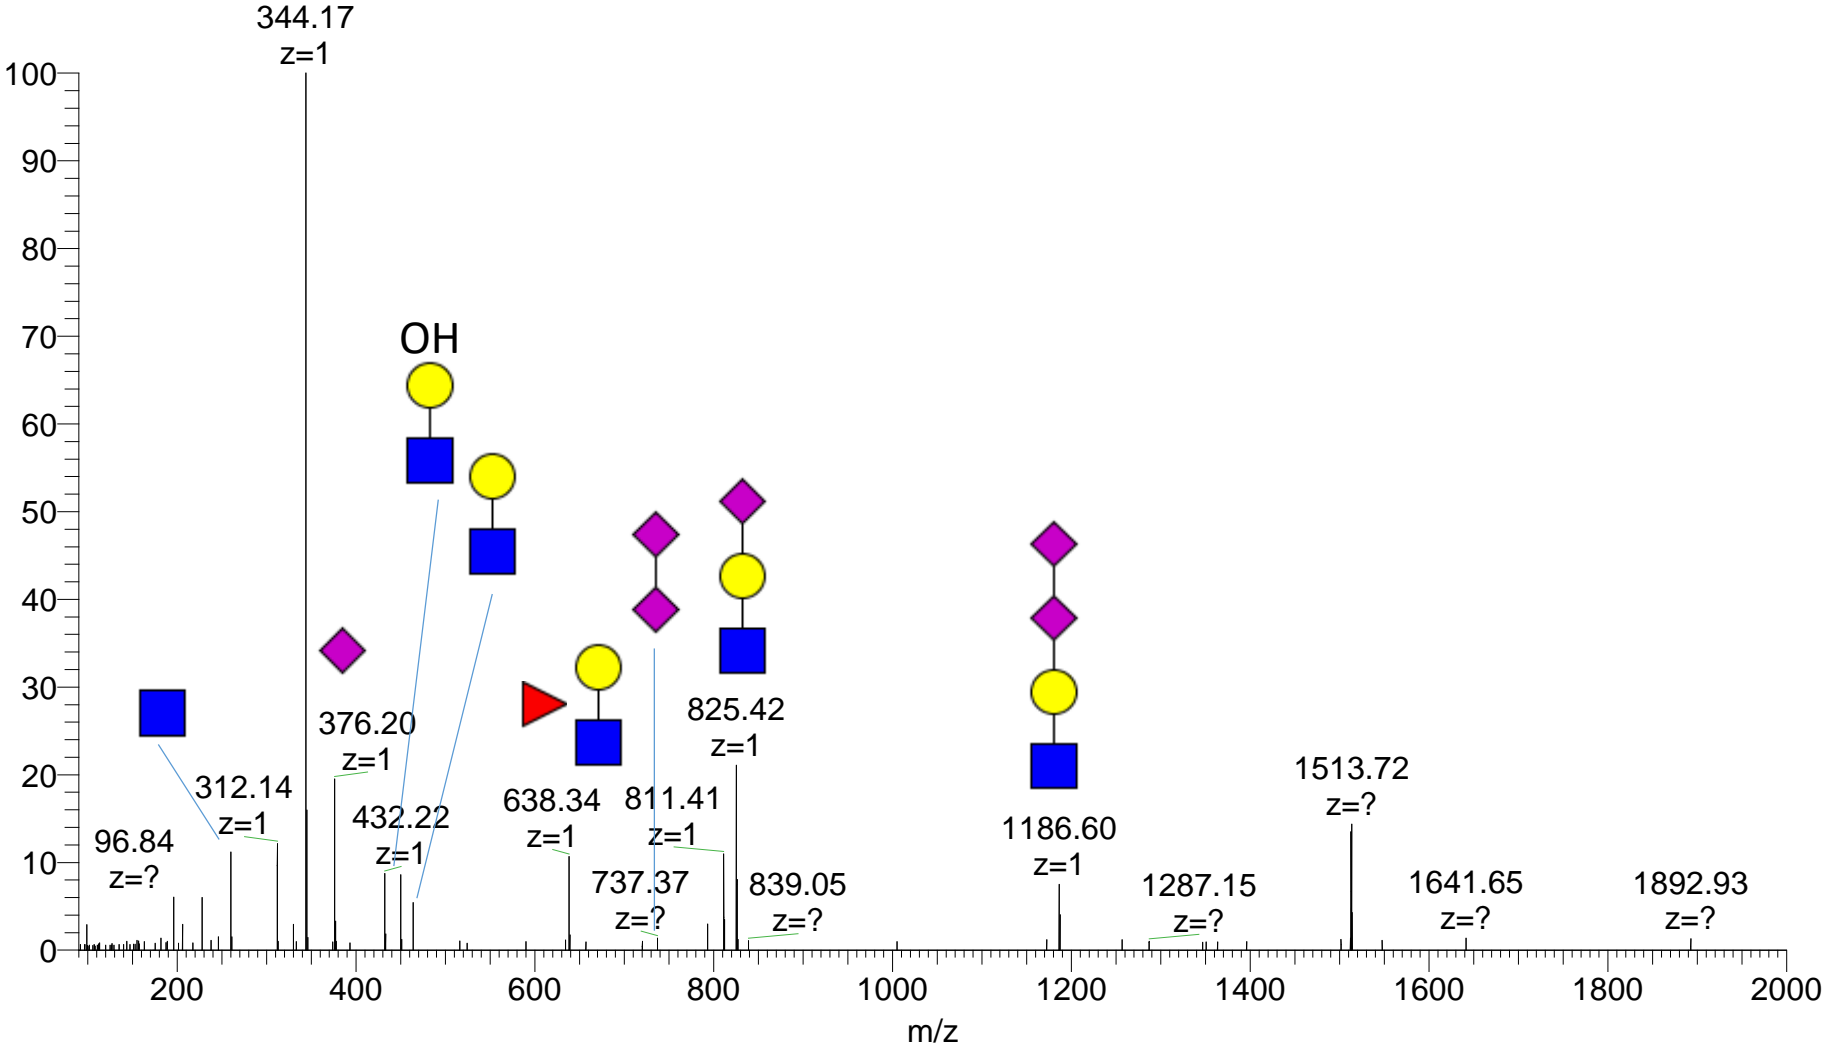

mbrain\_NG #24491 RT: 55.61 AV: 1 NL: 1.60E6  
T: FTMS + p NSI d Full ms2 1139.3340@hcd15.(

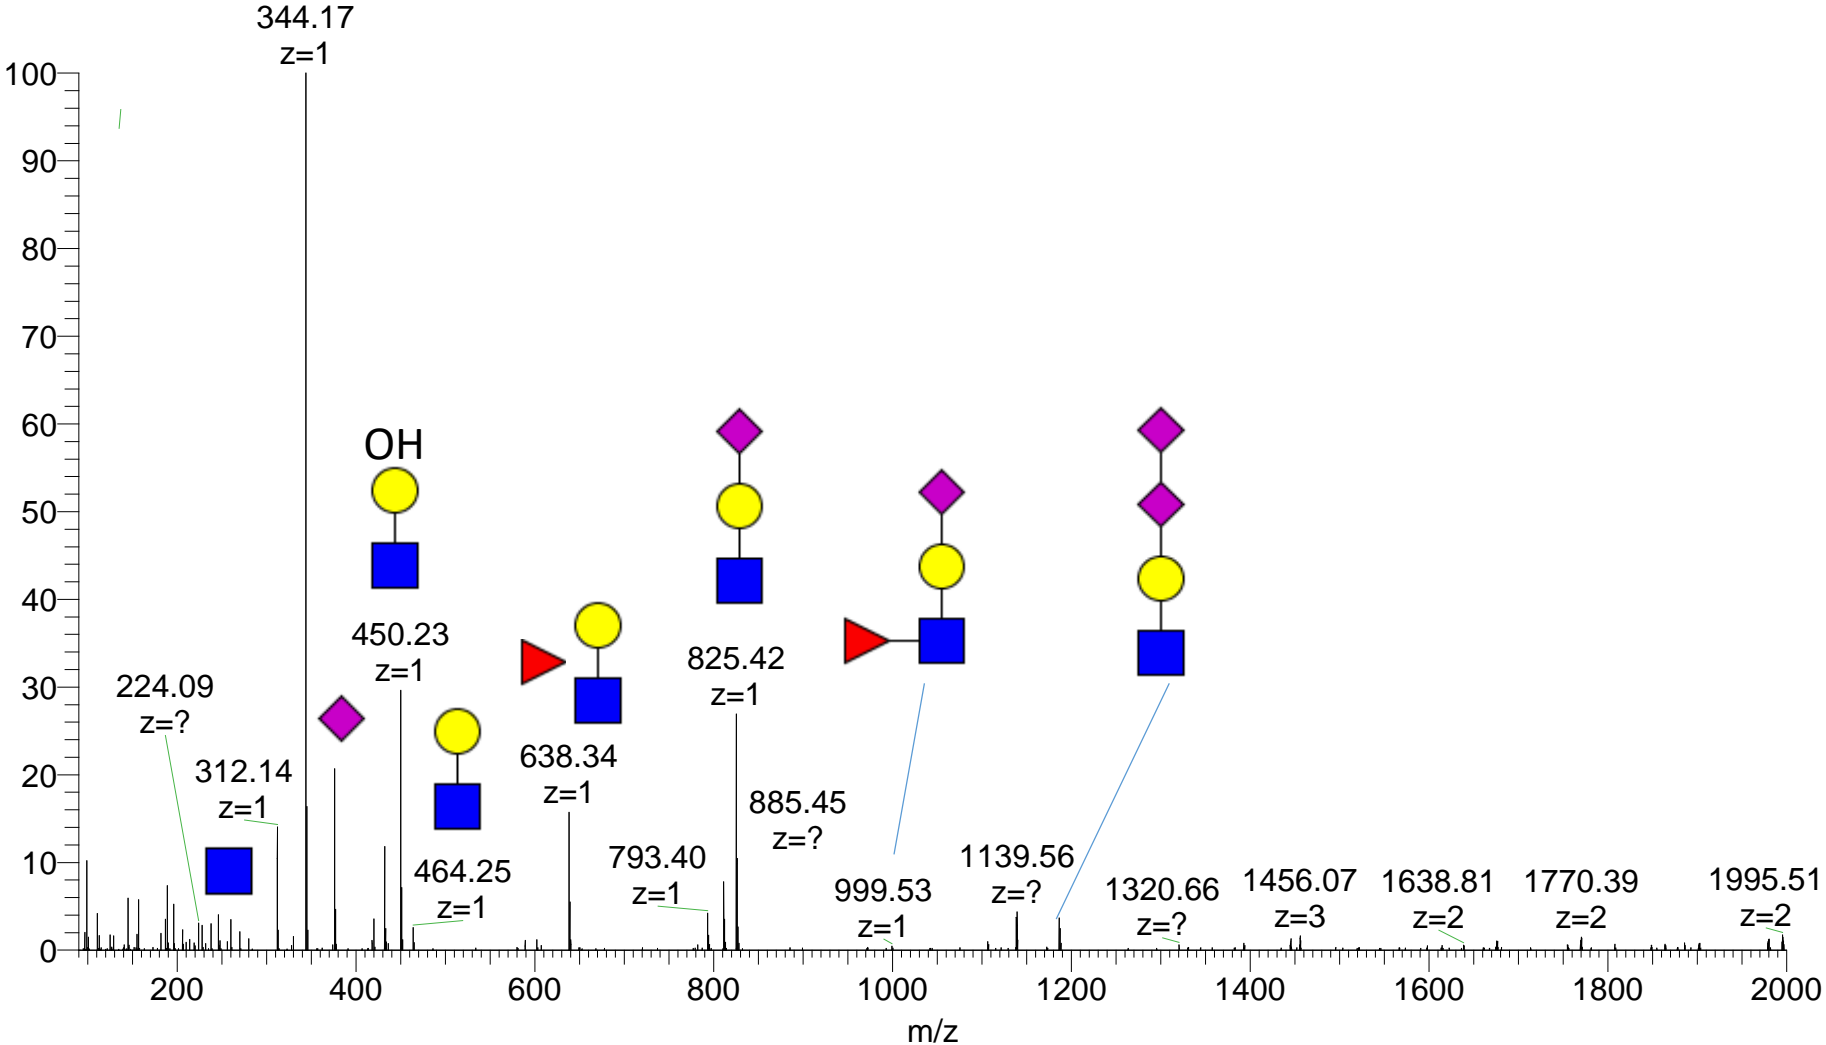

mbrain\_NG #24627 RT: 55.78 AV: 1 NL: 1.21E5  
T: FTMS + p NSI d Full ms2 1764.2236@hcd15.(

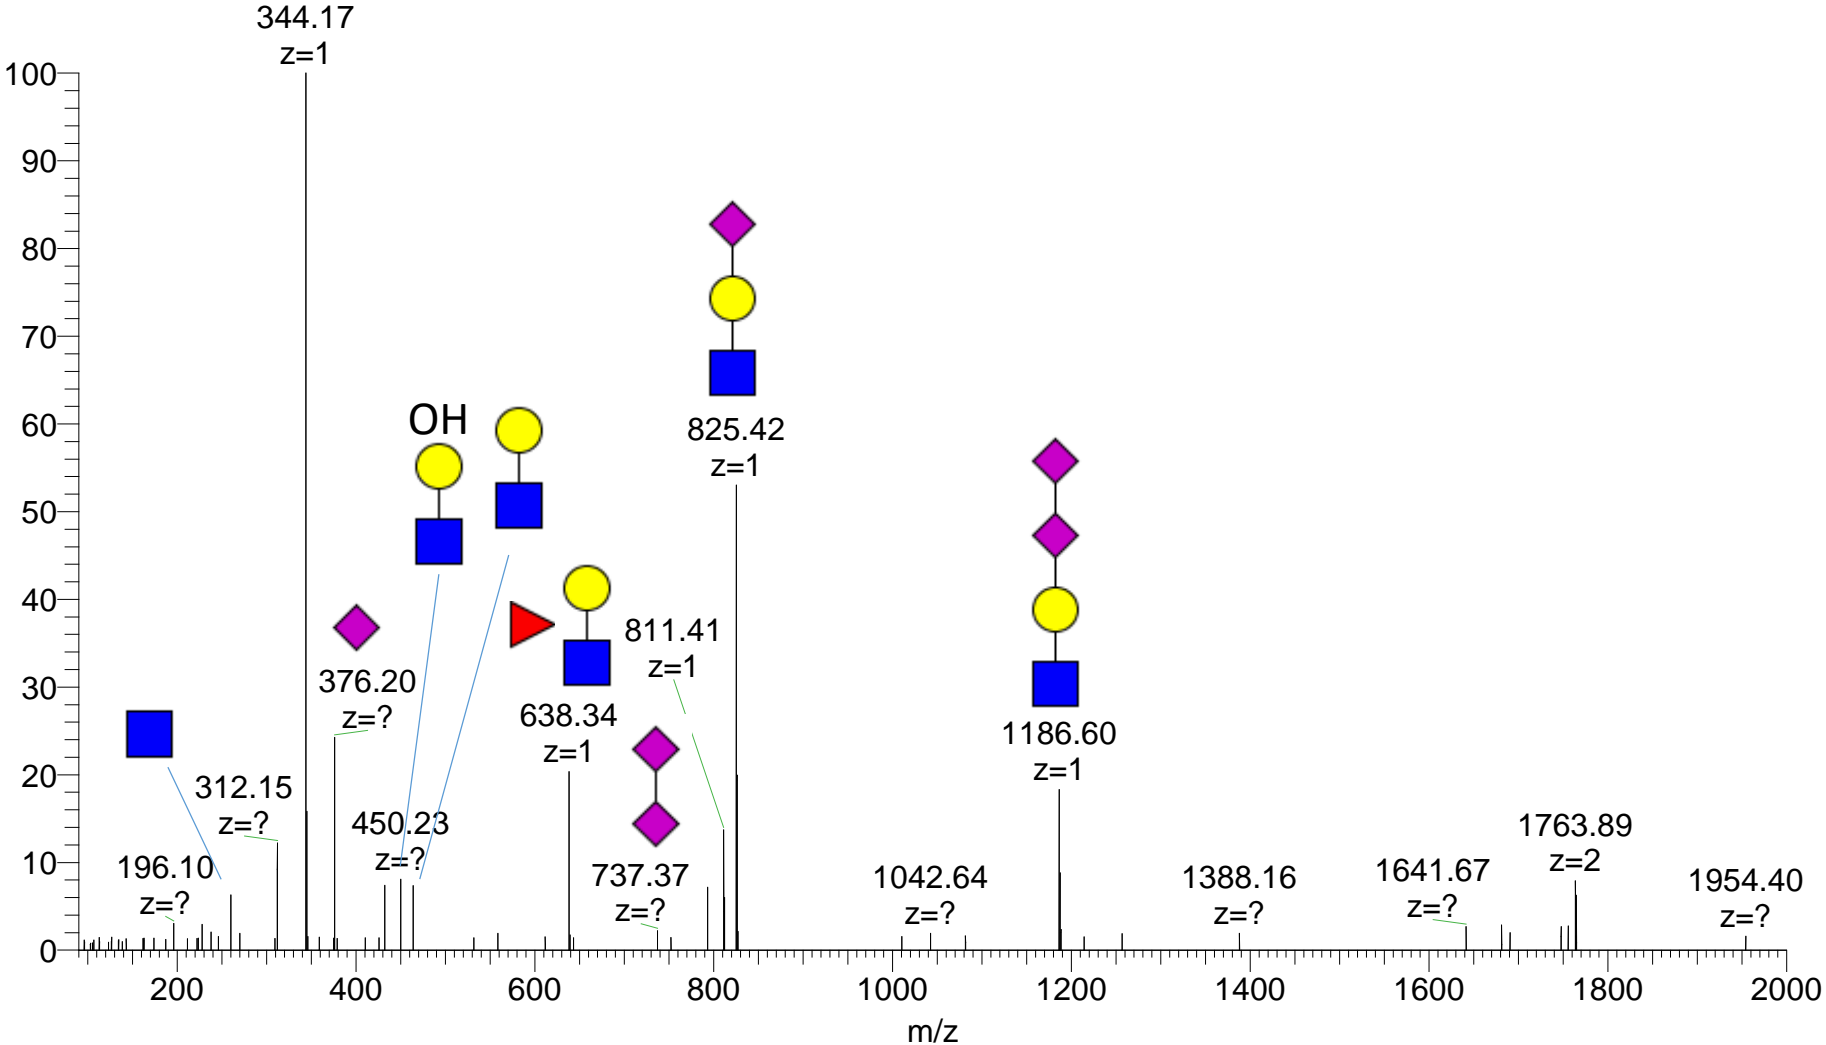



mbrain\_NG #24681 RT: 55.86 AV: 1 NL: 3.69E5

T: FTMS + p NSI d Full ms2 1503.7505@hcd15.(

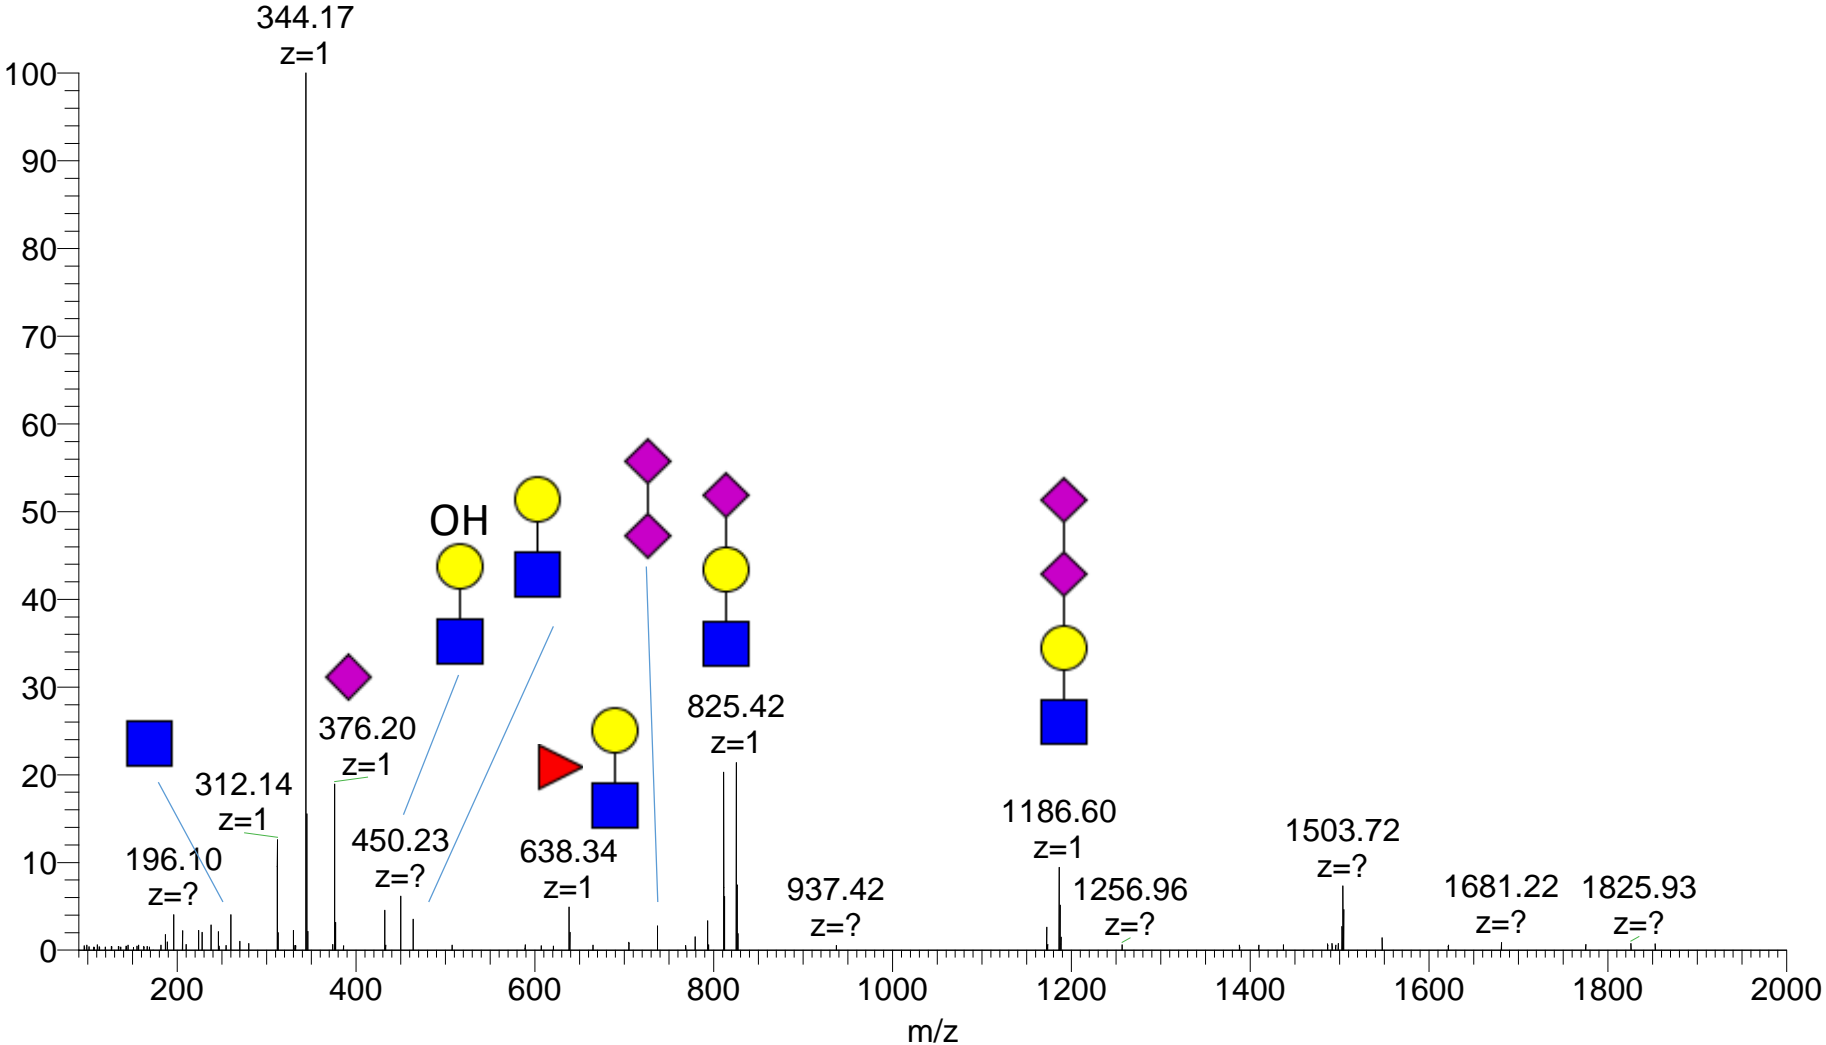

mbrain\_NG #24717 RT: 55.91 AV: 1 NL: 1.35E6  
T: FTMS + p NSI d Full ms2 1258.6464@hcd15.(

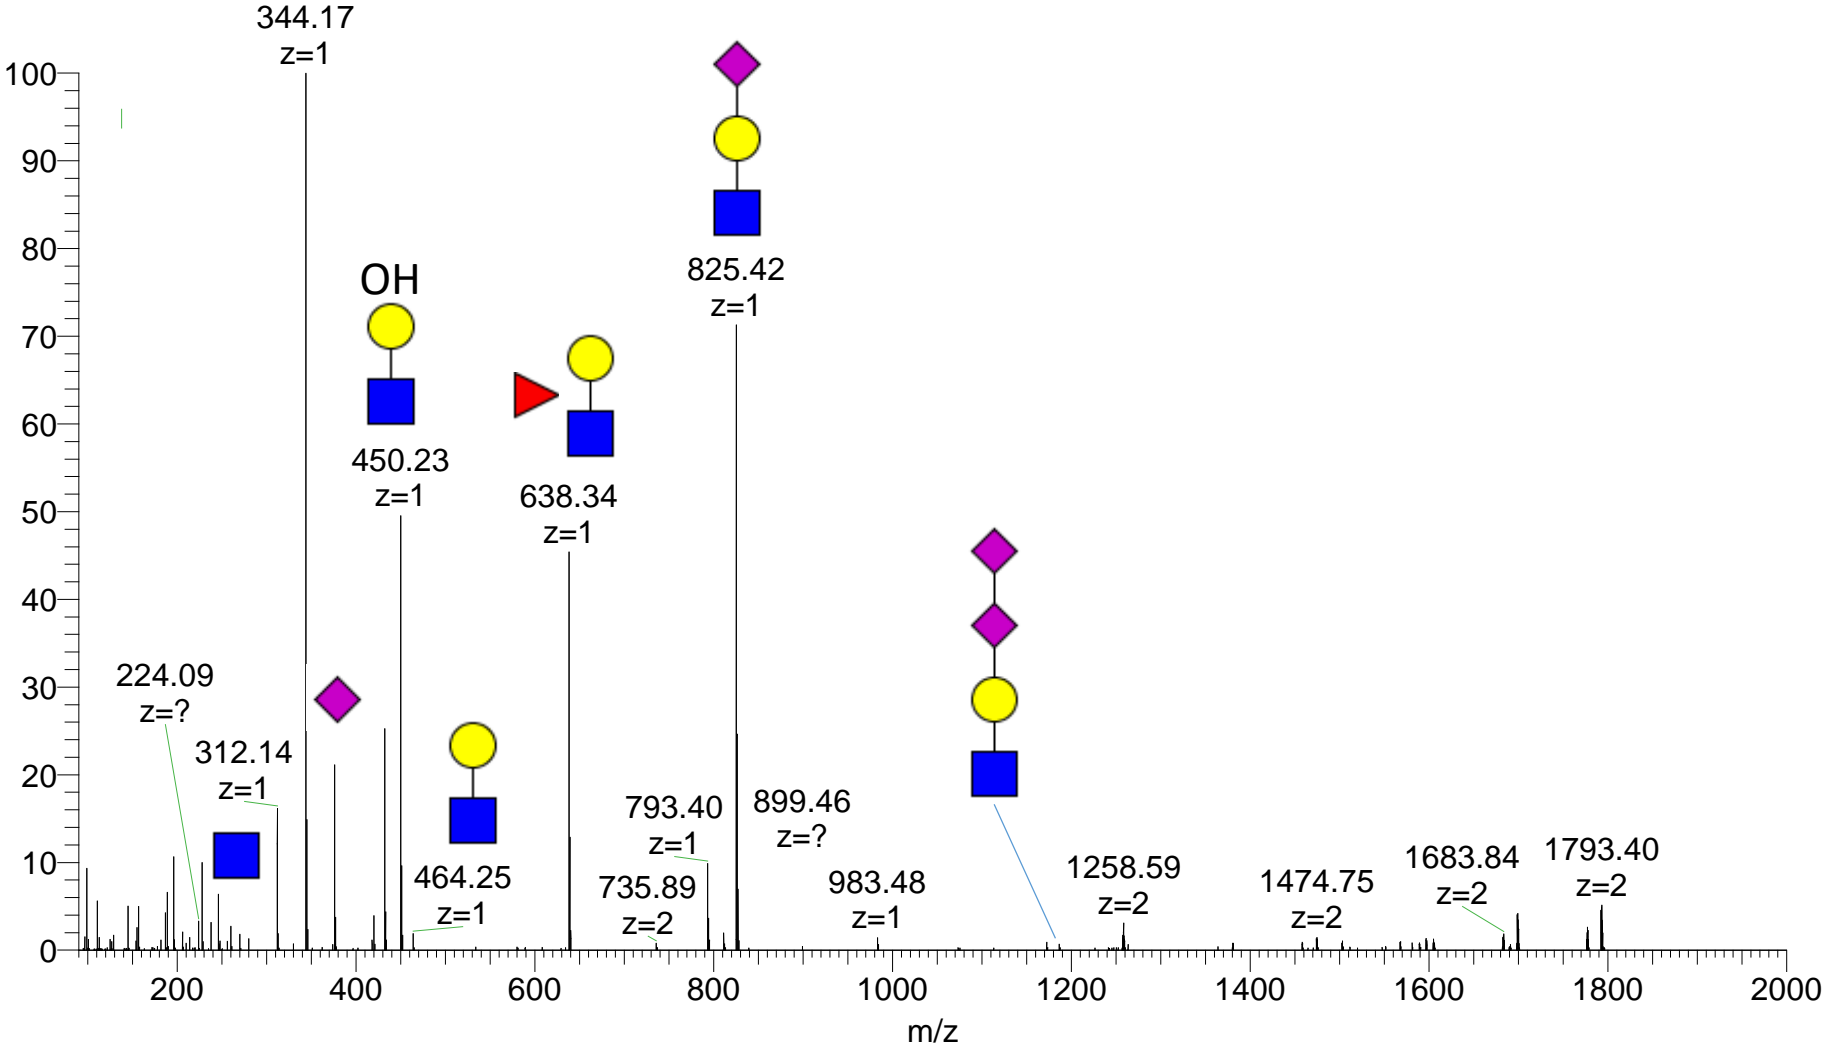

mbrain\_NG #24797 RT: 56.02 AV: 1 NL: 6.78E5

T: FTMS + p NSI d Full ms2 1127.5801@hcd15.(

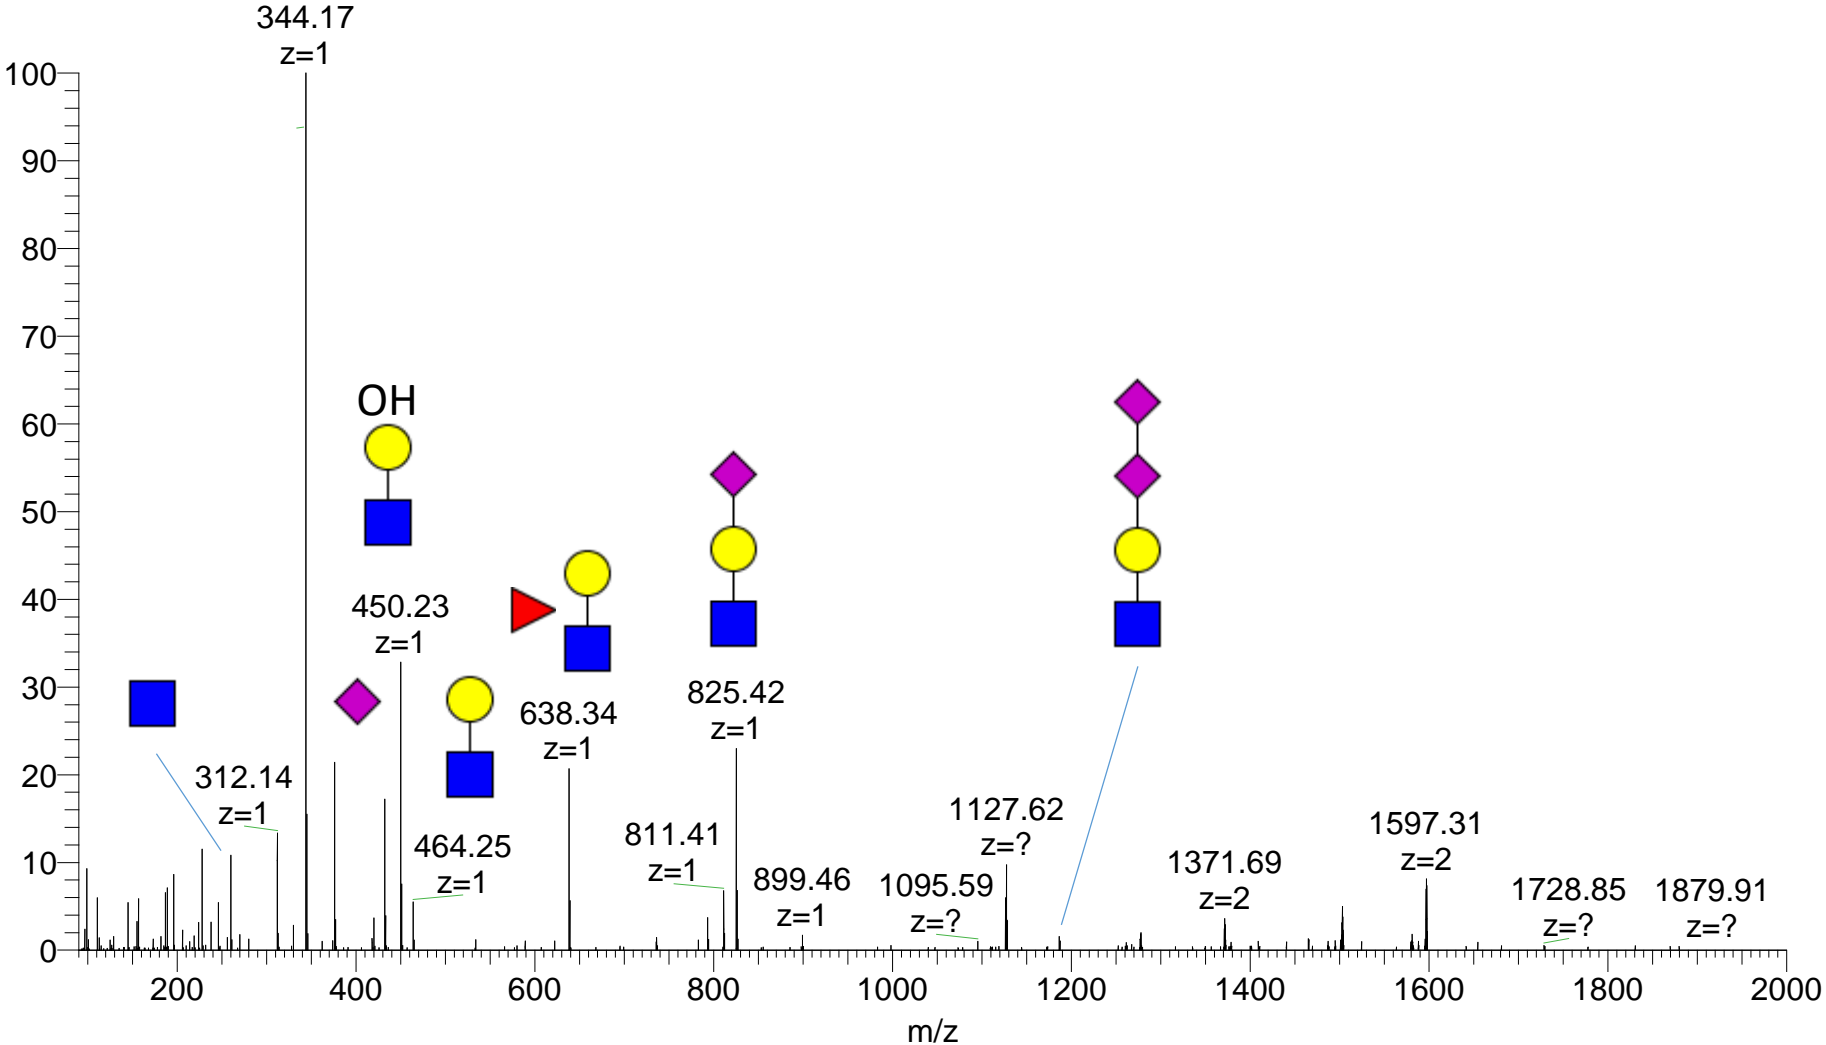

mbrain\_NG #24853 RT: 56.09 AV: 1 NL: 1.98E5

T: FTMS + p NSI d Full ms2 1441.3969@hcd15.(

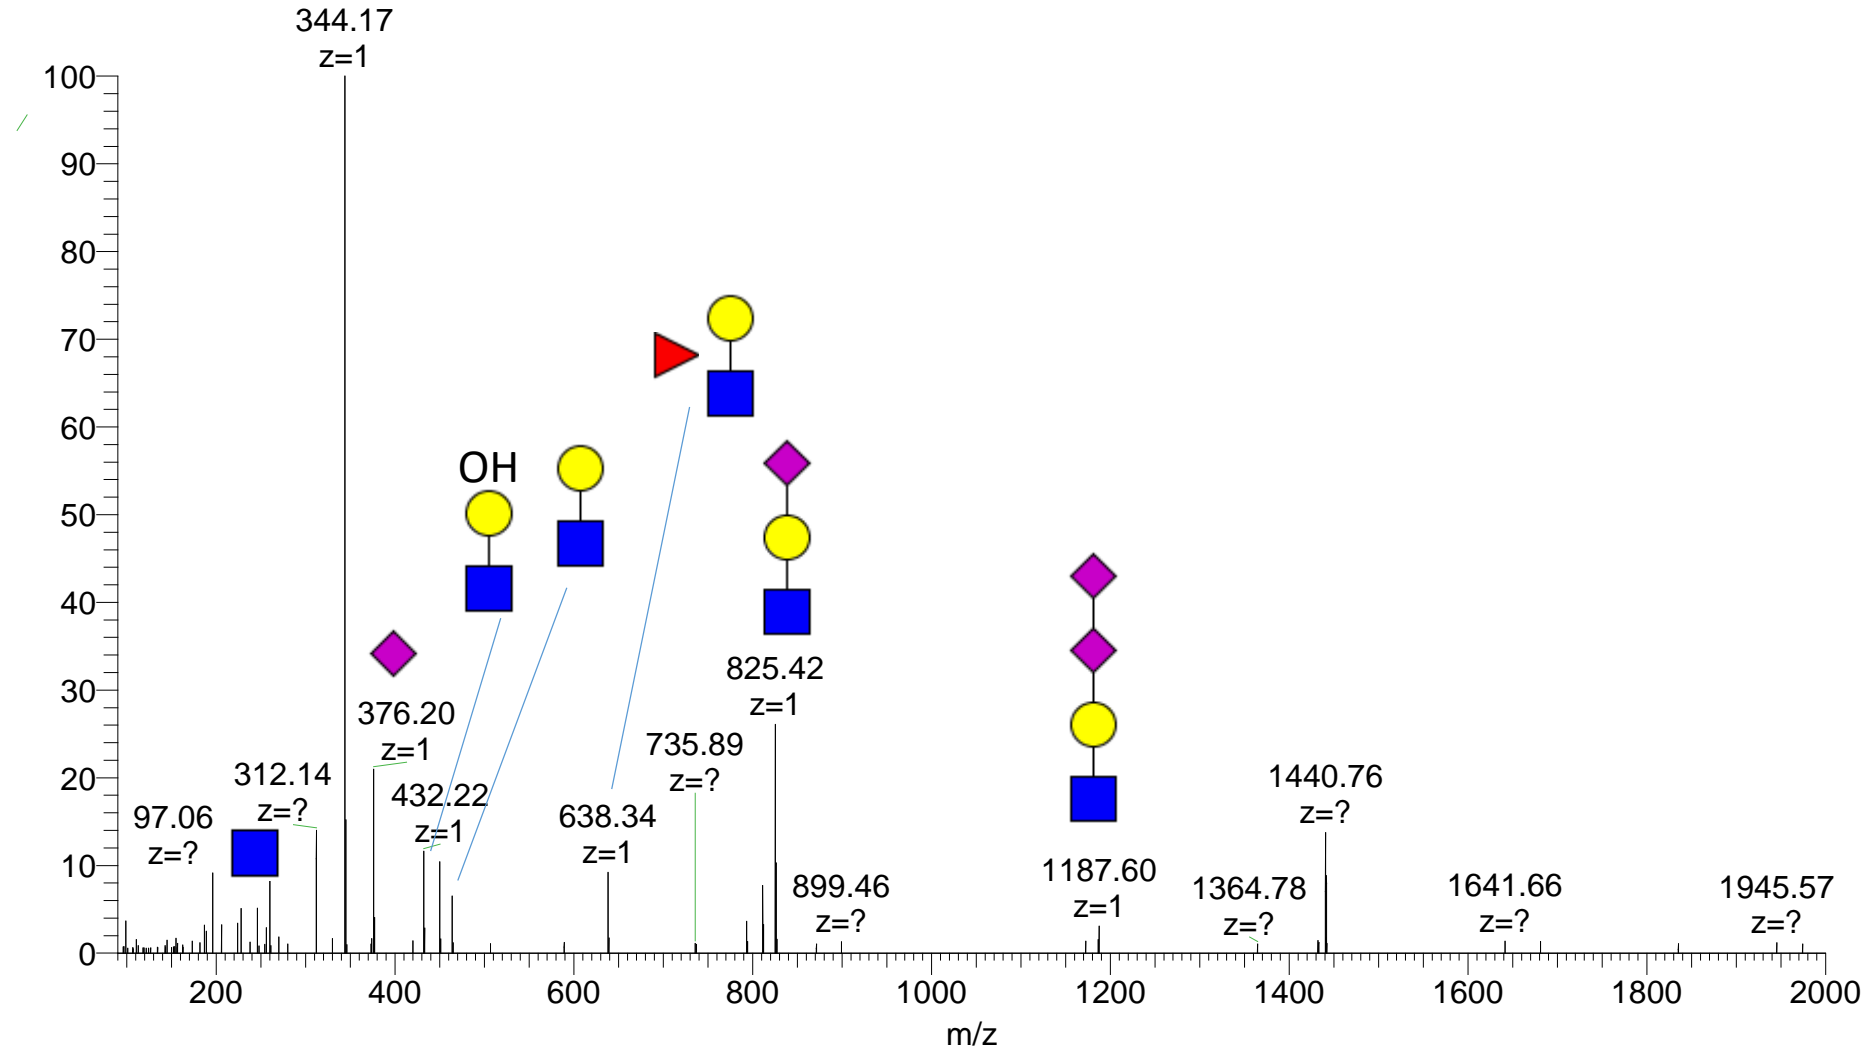

mbrain\_NG #24875 RT: 56.12 AV: 1 NL: 9.65E5  
T: FTMS + p NSI d Full ms2 1049.0409@hcd15.(

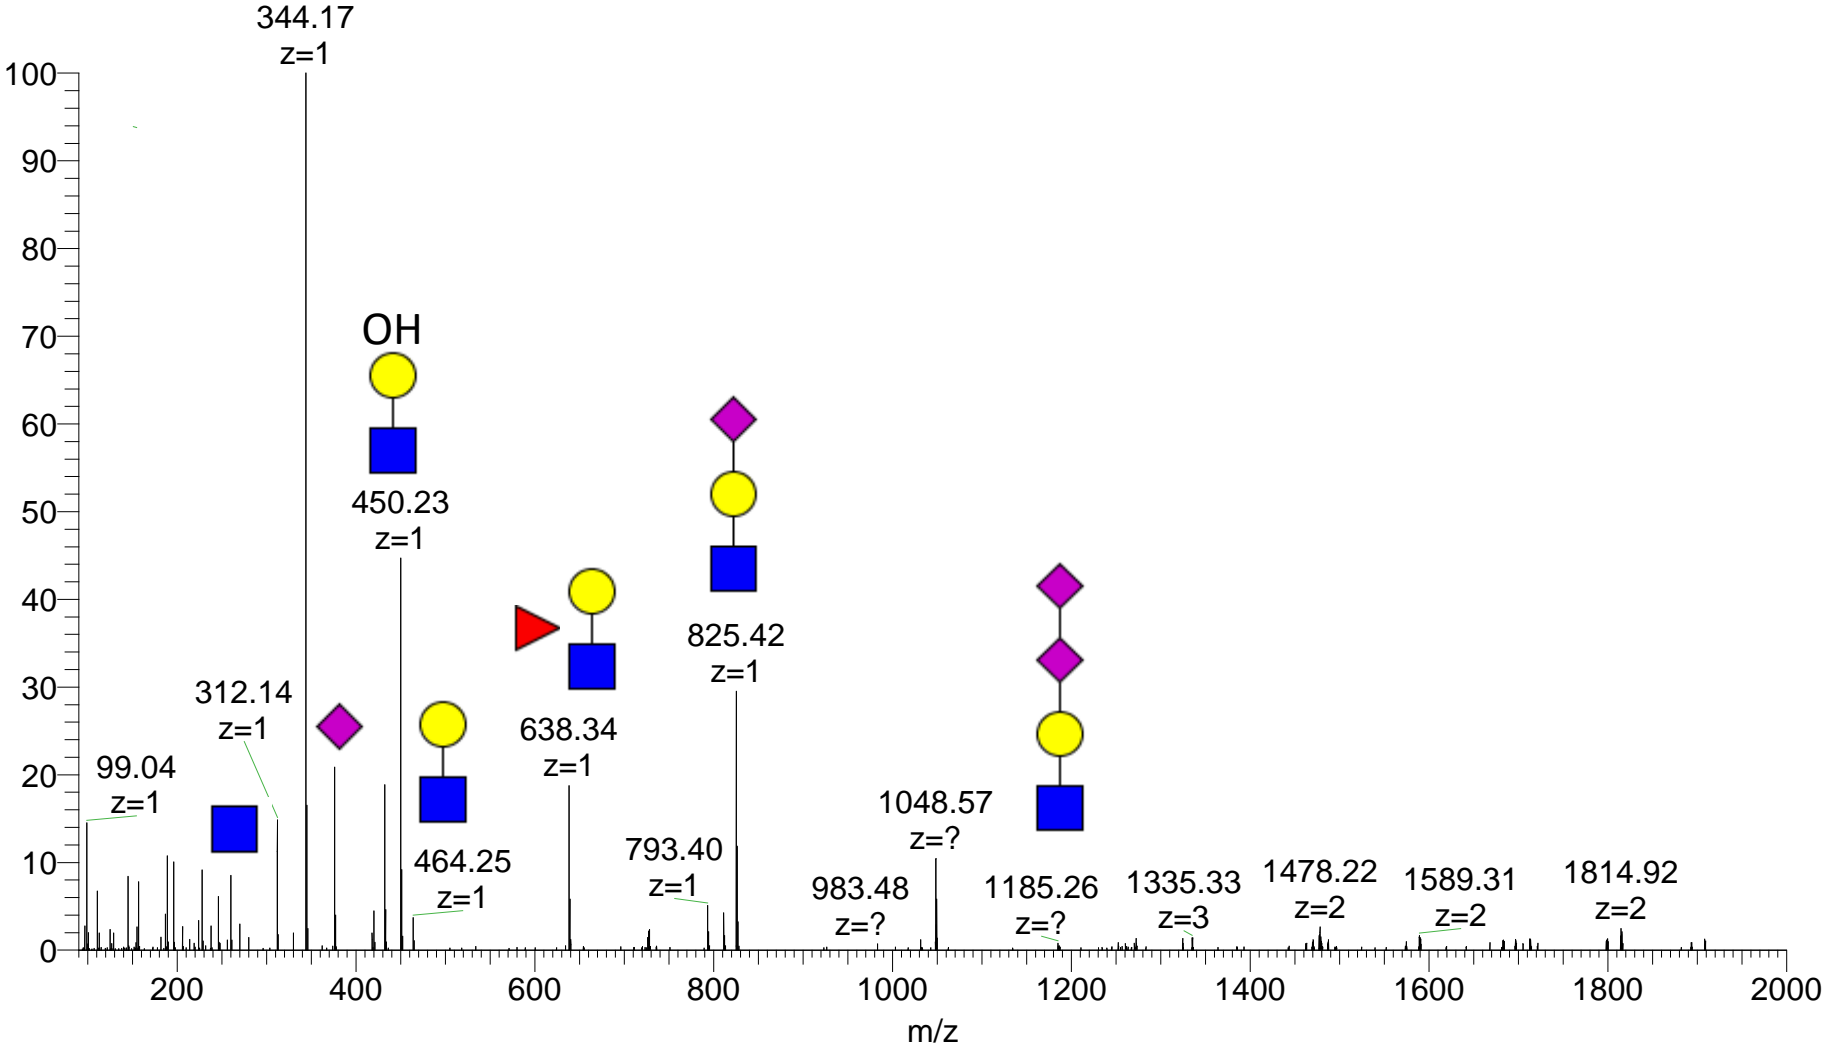

mbrain\_NG #25014 RT: 56.30 AV: 1 NL: 1.62E5  
T: FTMS + p NSI d Full ms2 1512.4314@hcd15.(

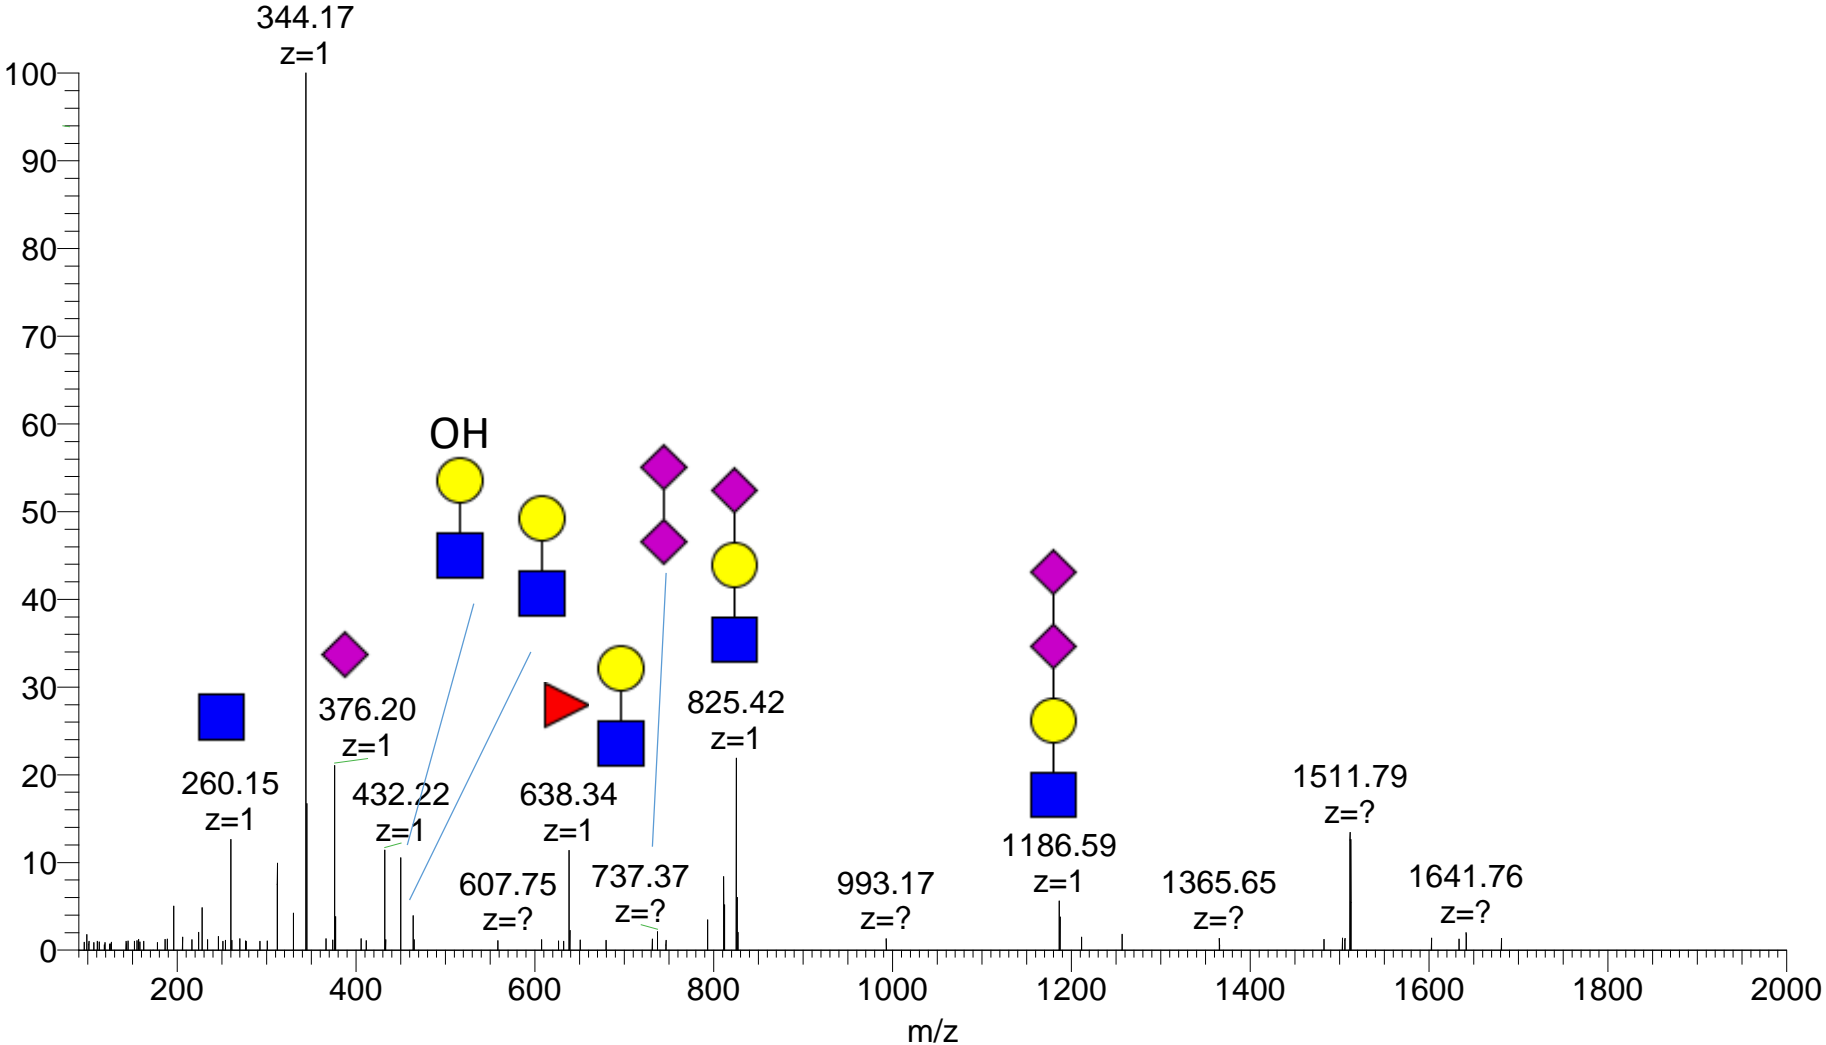

mbrain\_NG #25054 RT: 56.35 AV: 1 NL: 1.03E5

T: FTMS + p NSI d Full ms2 1656.8361@hcd15.(

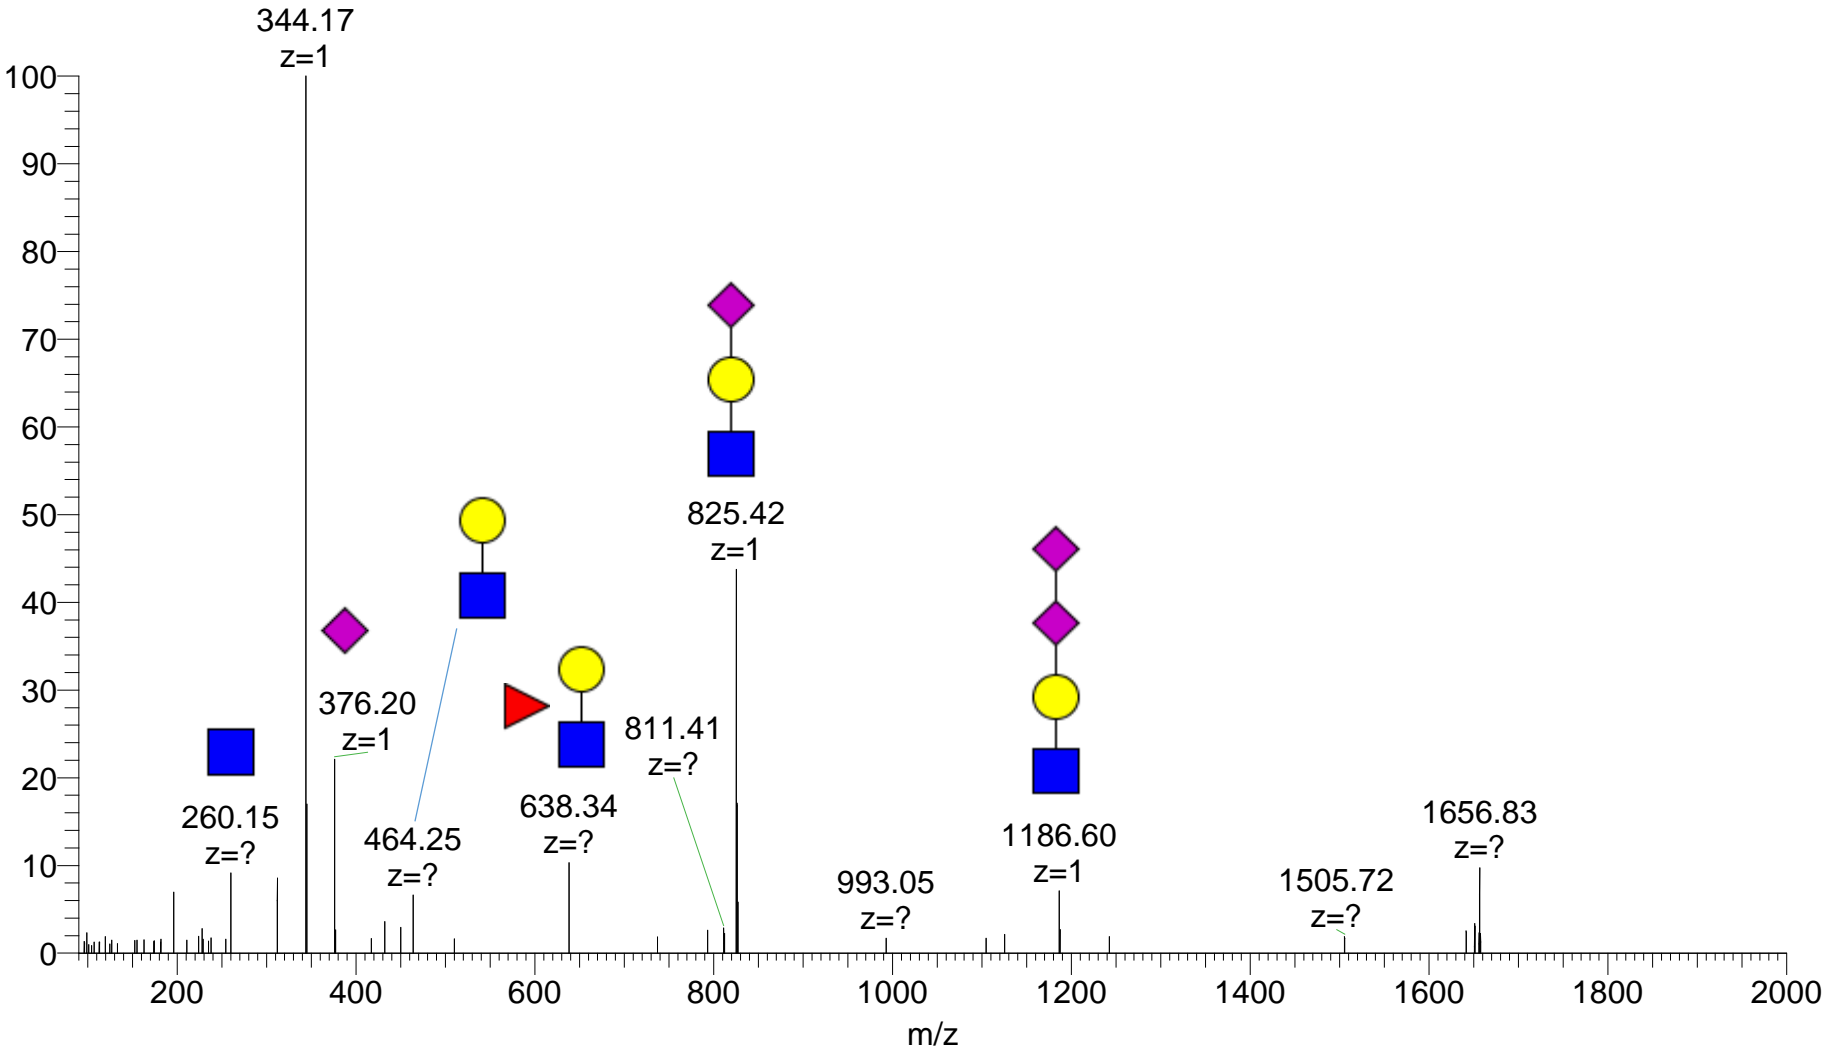

mbrain\_NG #25073 RT: 56.38 AV: 1 NL: 5.61E4

T: FTMS + p NSI d Full ms2 1884.9462@hcd15.(

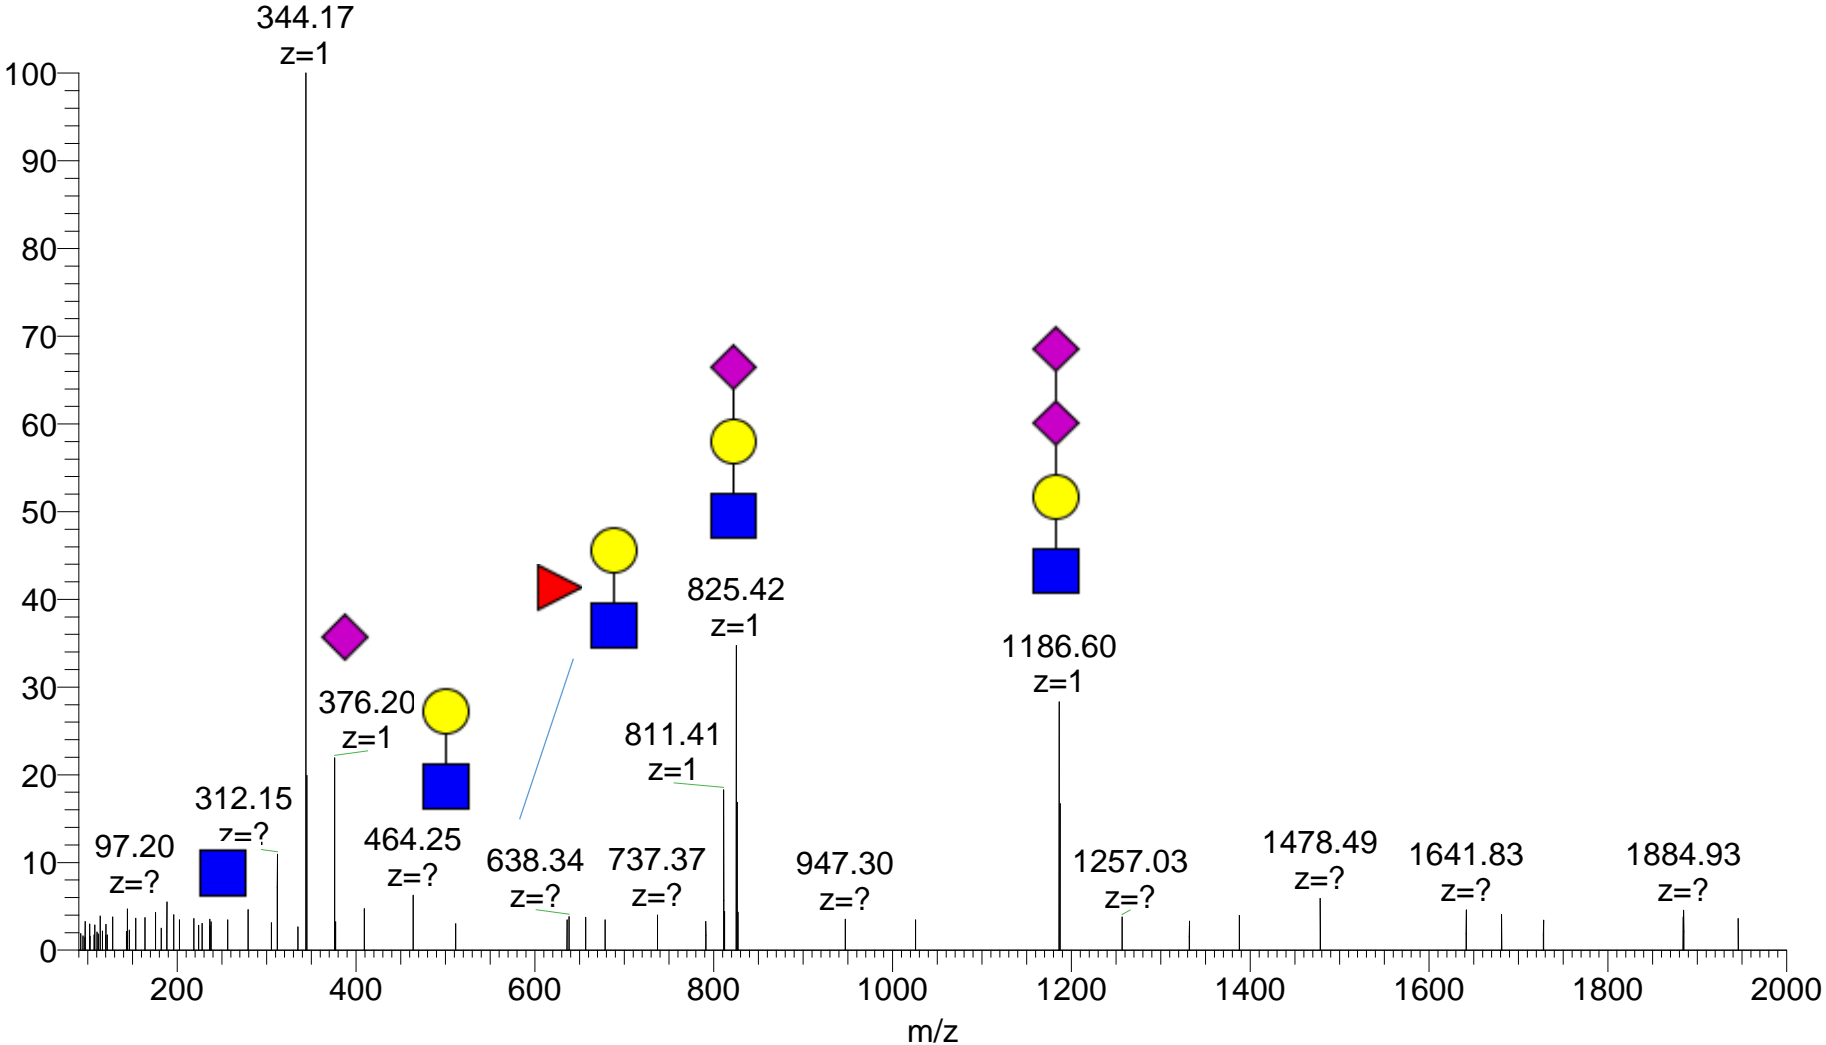



mbrain\_NG #25154 RT: 56.50 AV: 1 NL: 4.97E5

T: FTMS + p NSI d Full ms2 1366.6924@hcd15.(

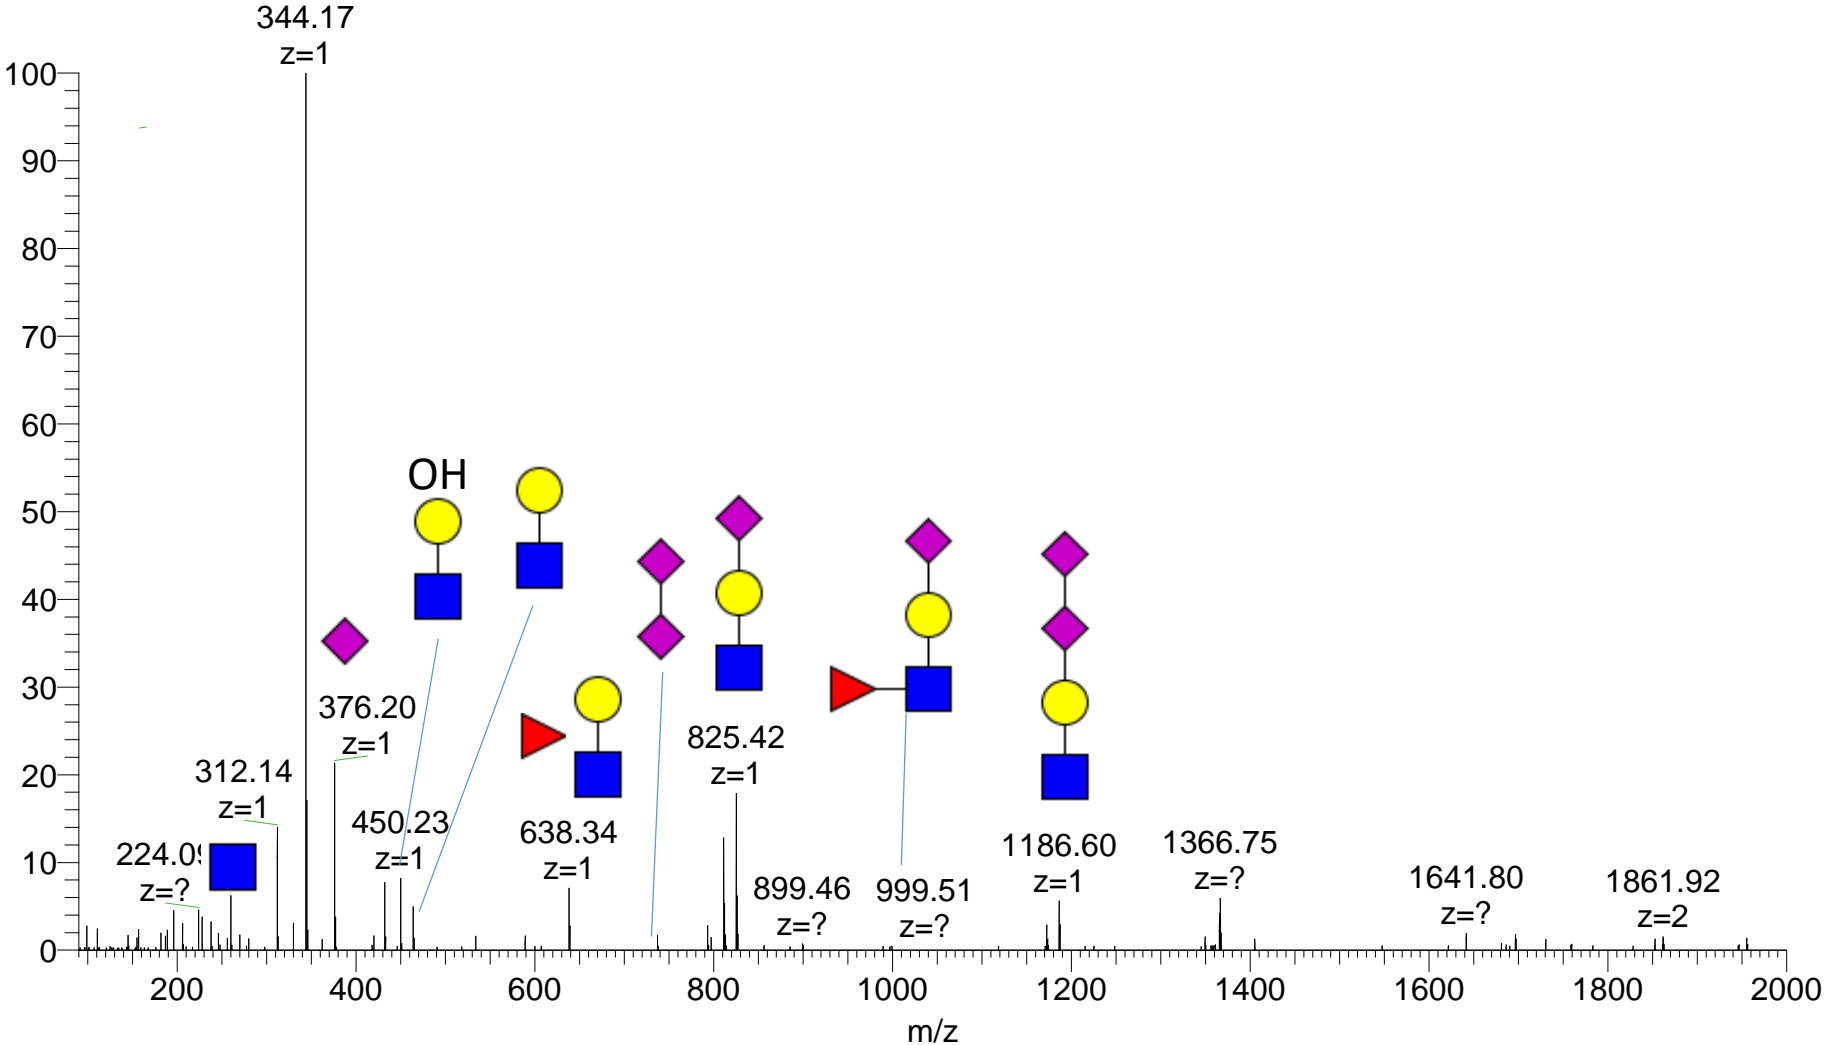

mbrain\_NG #25508 RT: 56.98 AV: 1 NL: 8.66E4

T: FTMS + p NSI d Full ms2 1763.8849@hcd15.(

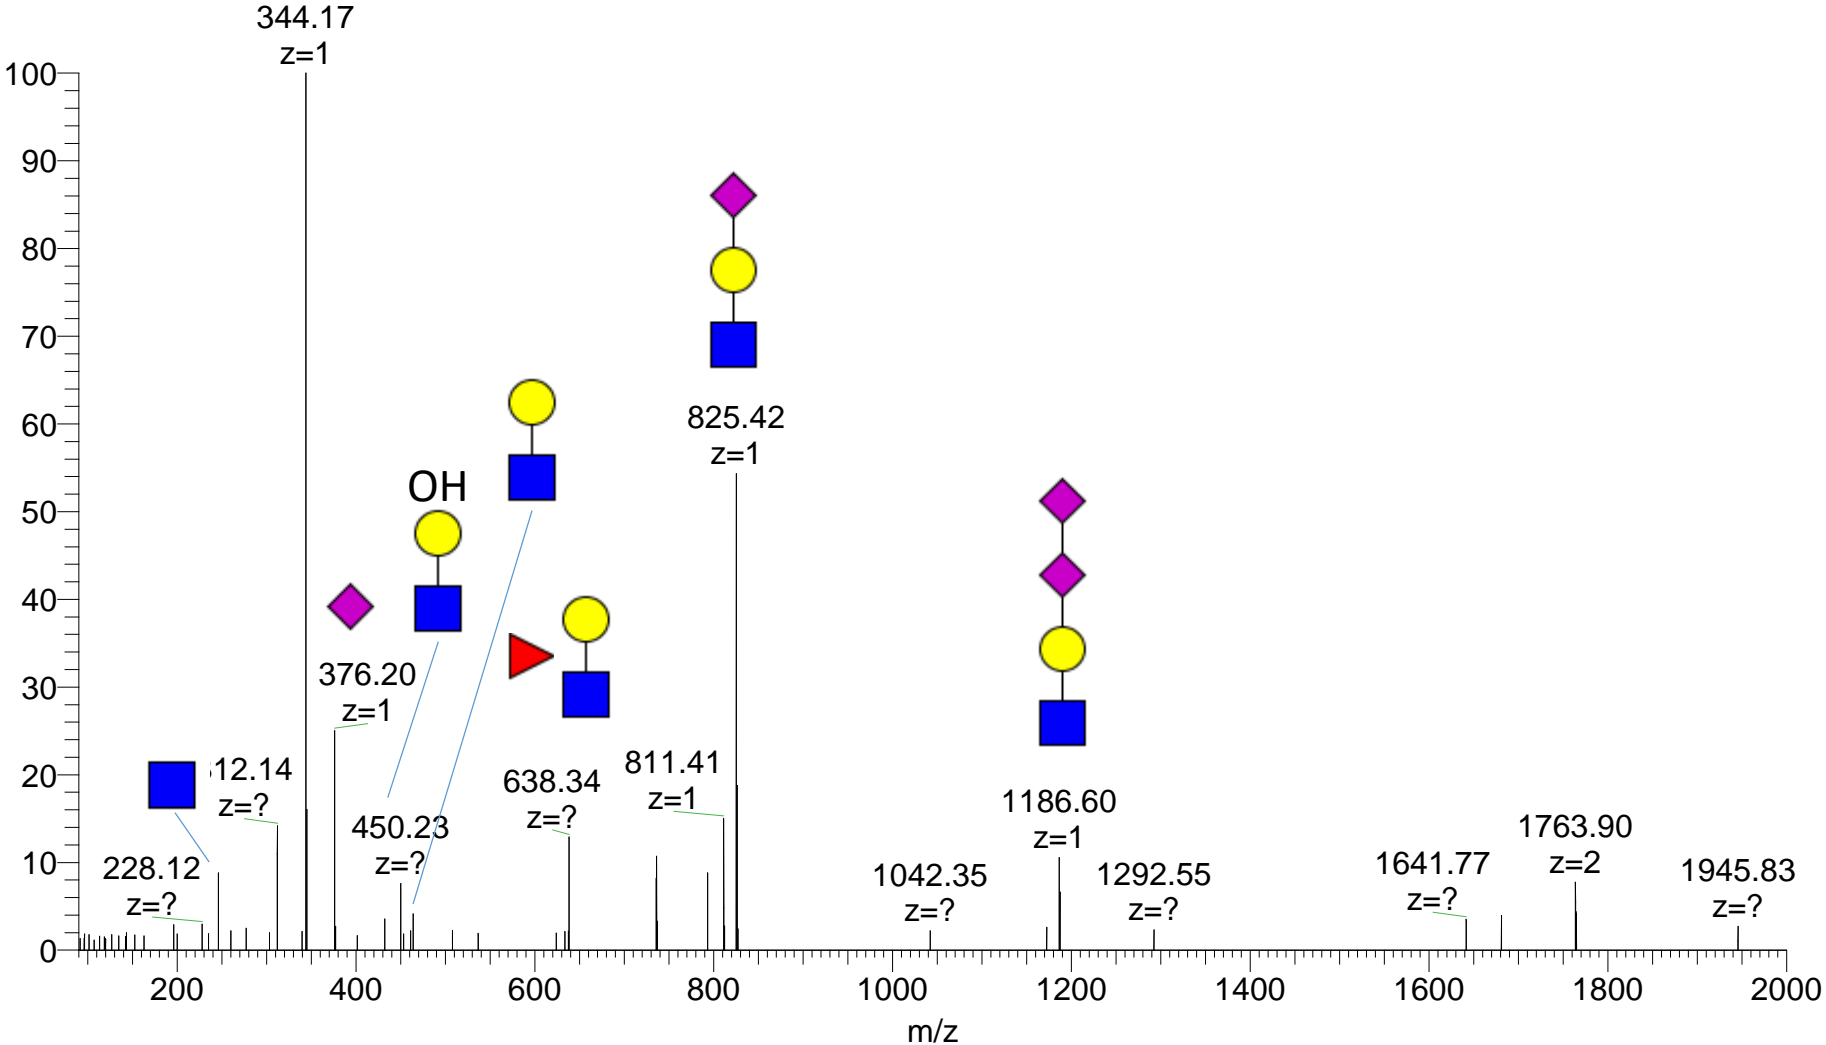

mbrain\_NG #25572 RT: 57.07 AV: 1 NL: 4.95E5

T: FTMS + p NSI d Full ms2 1271.6506@hcd15.(

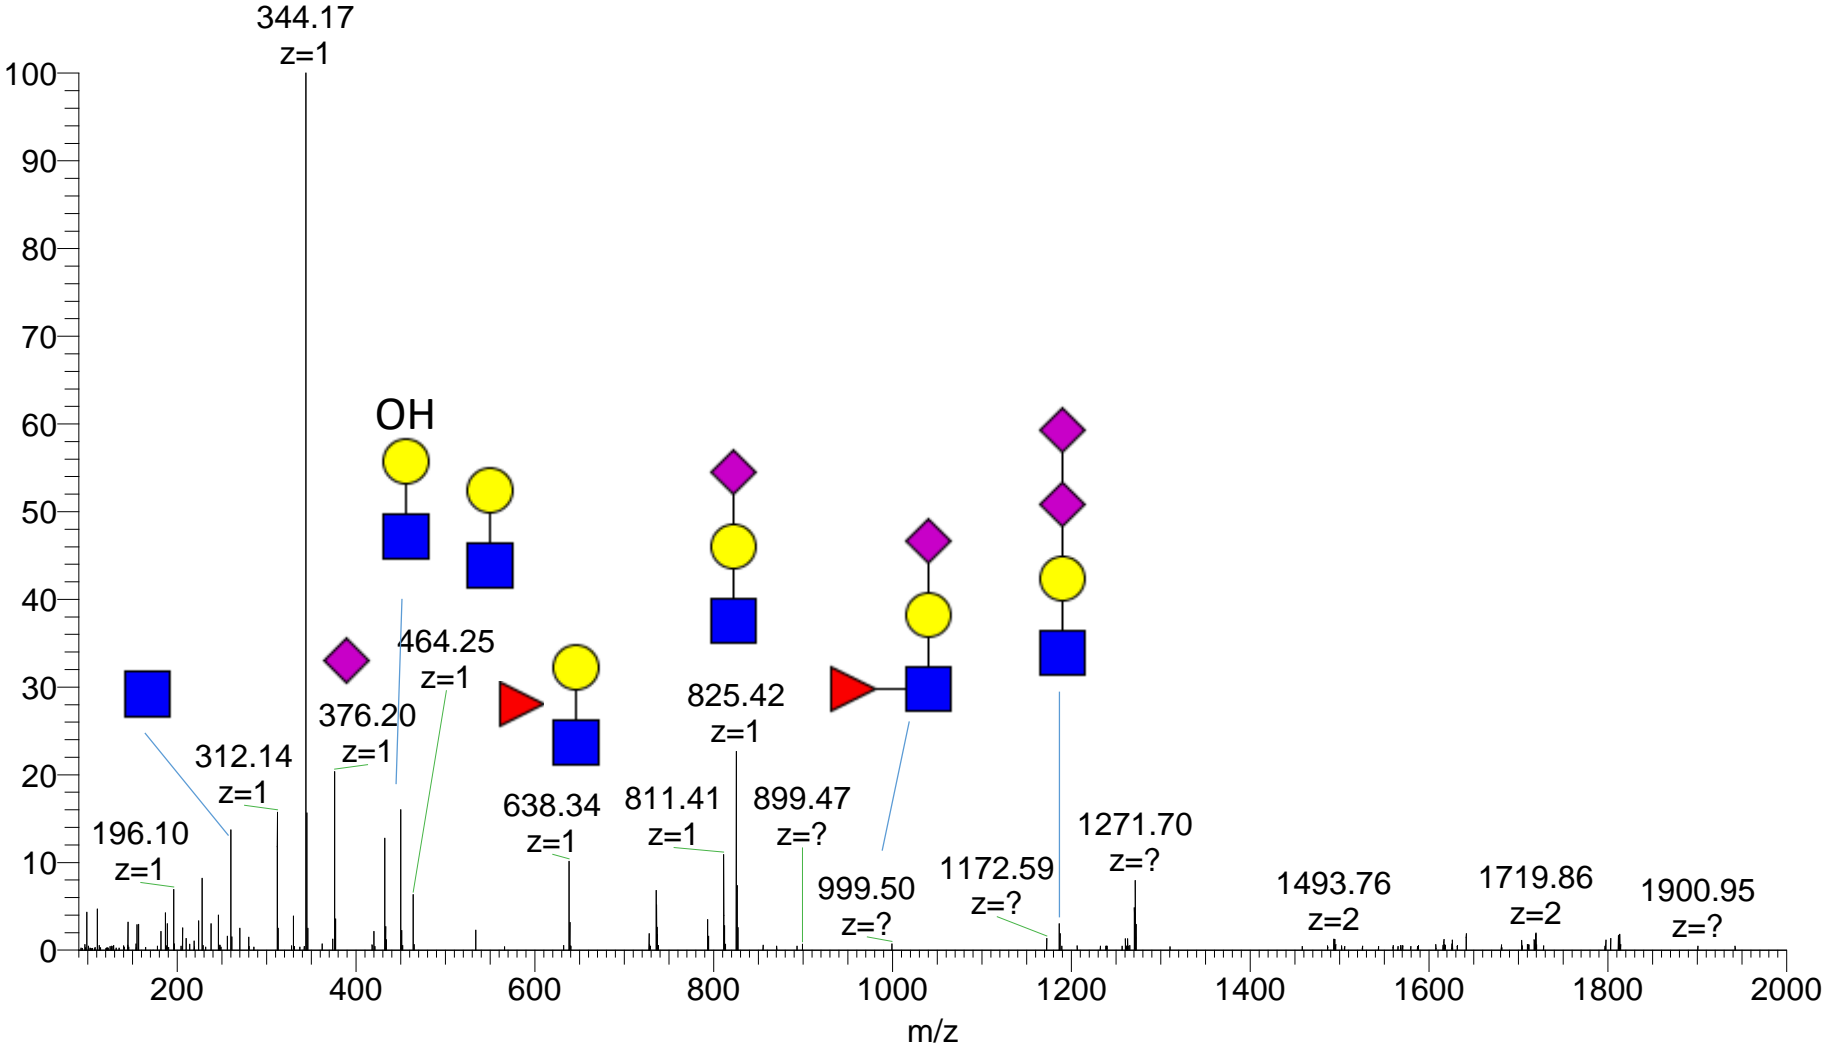

mbrain\_NG #25581 RT: 57.08 AV: 1 NL: 9.20E4  
T: FTMS + p NSI d Full ms2 1701.5288@hcd15.(

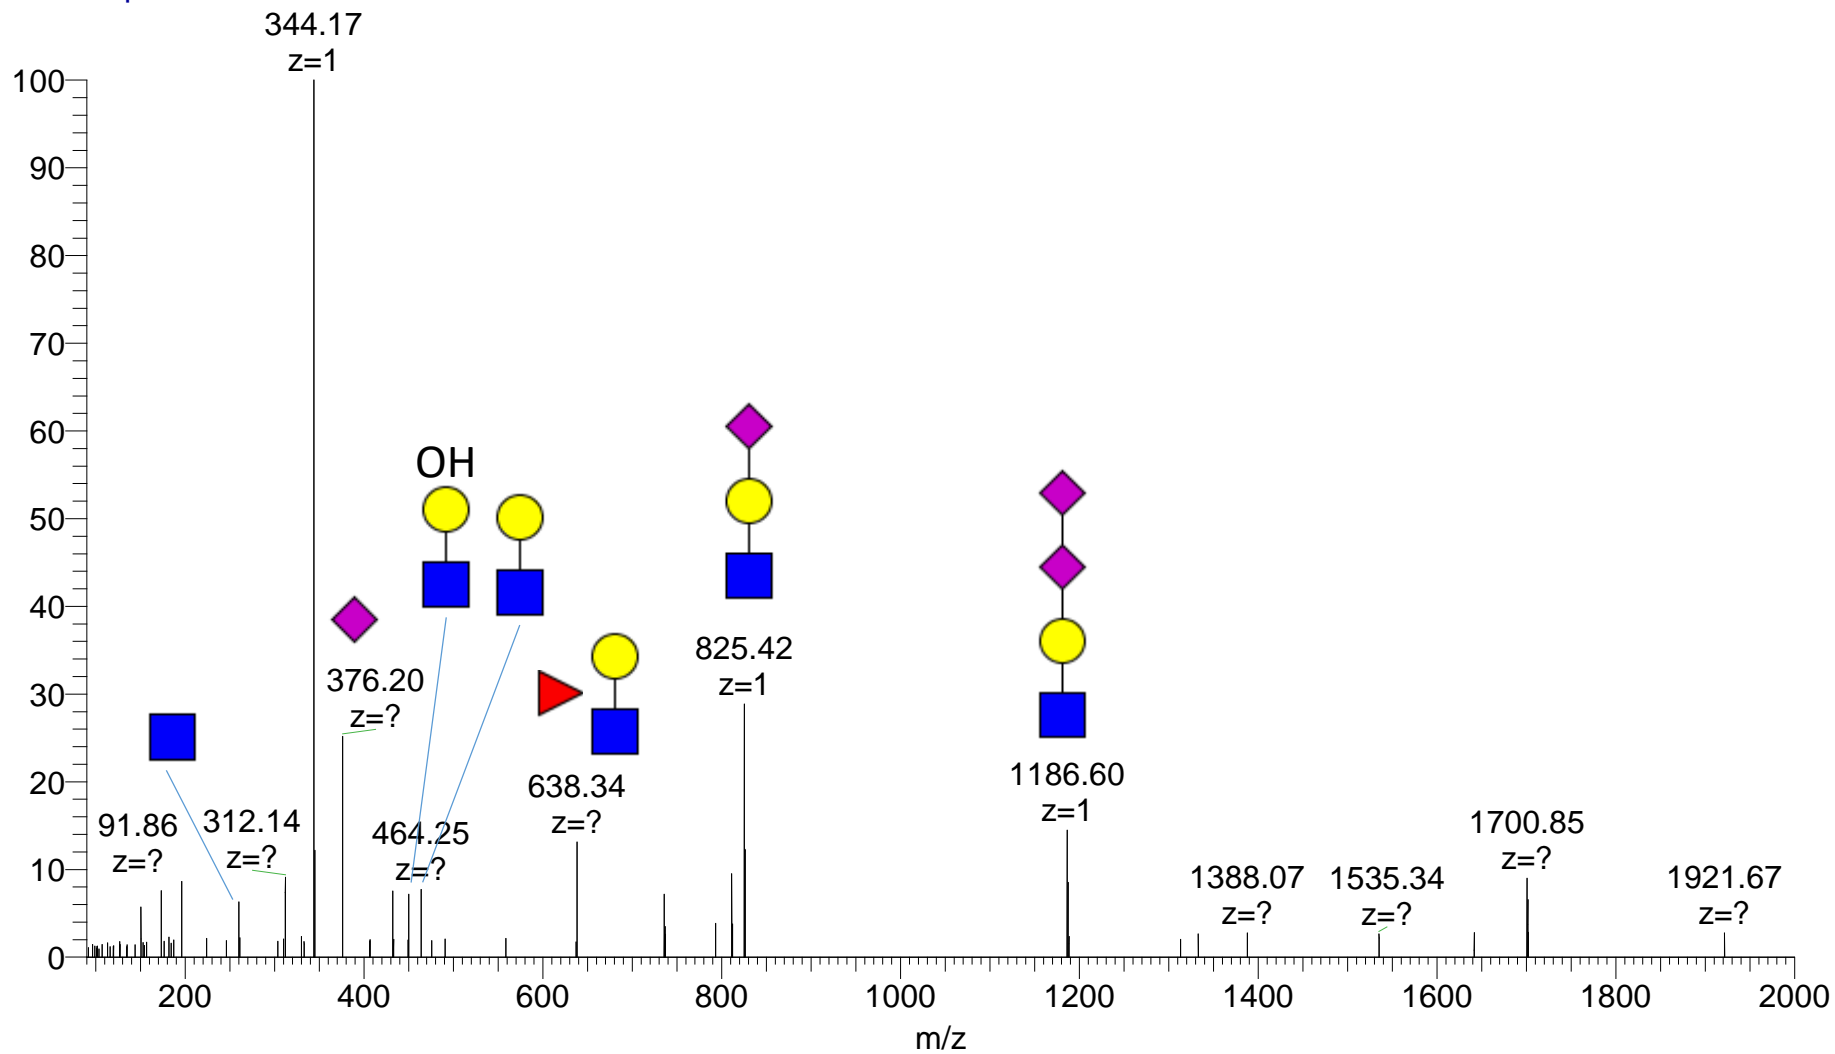

mbrain\_NG #25823 RT: 57.41 AV: 1 NL: 1.22E5  
T: FTMS + p NSI d Full ms2 1498.7620@hcd15.(

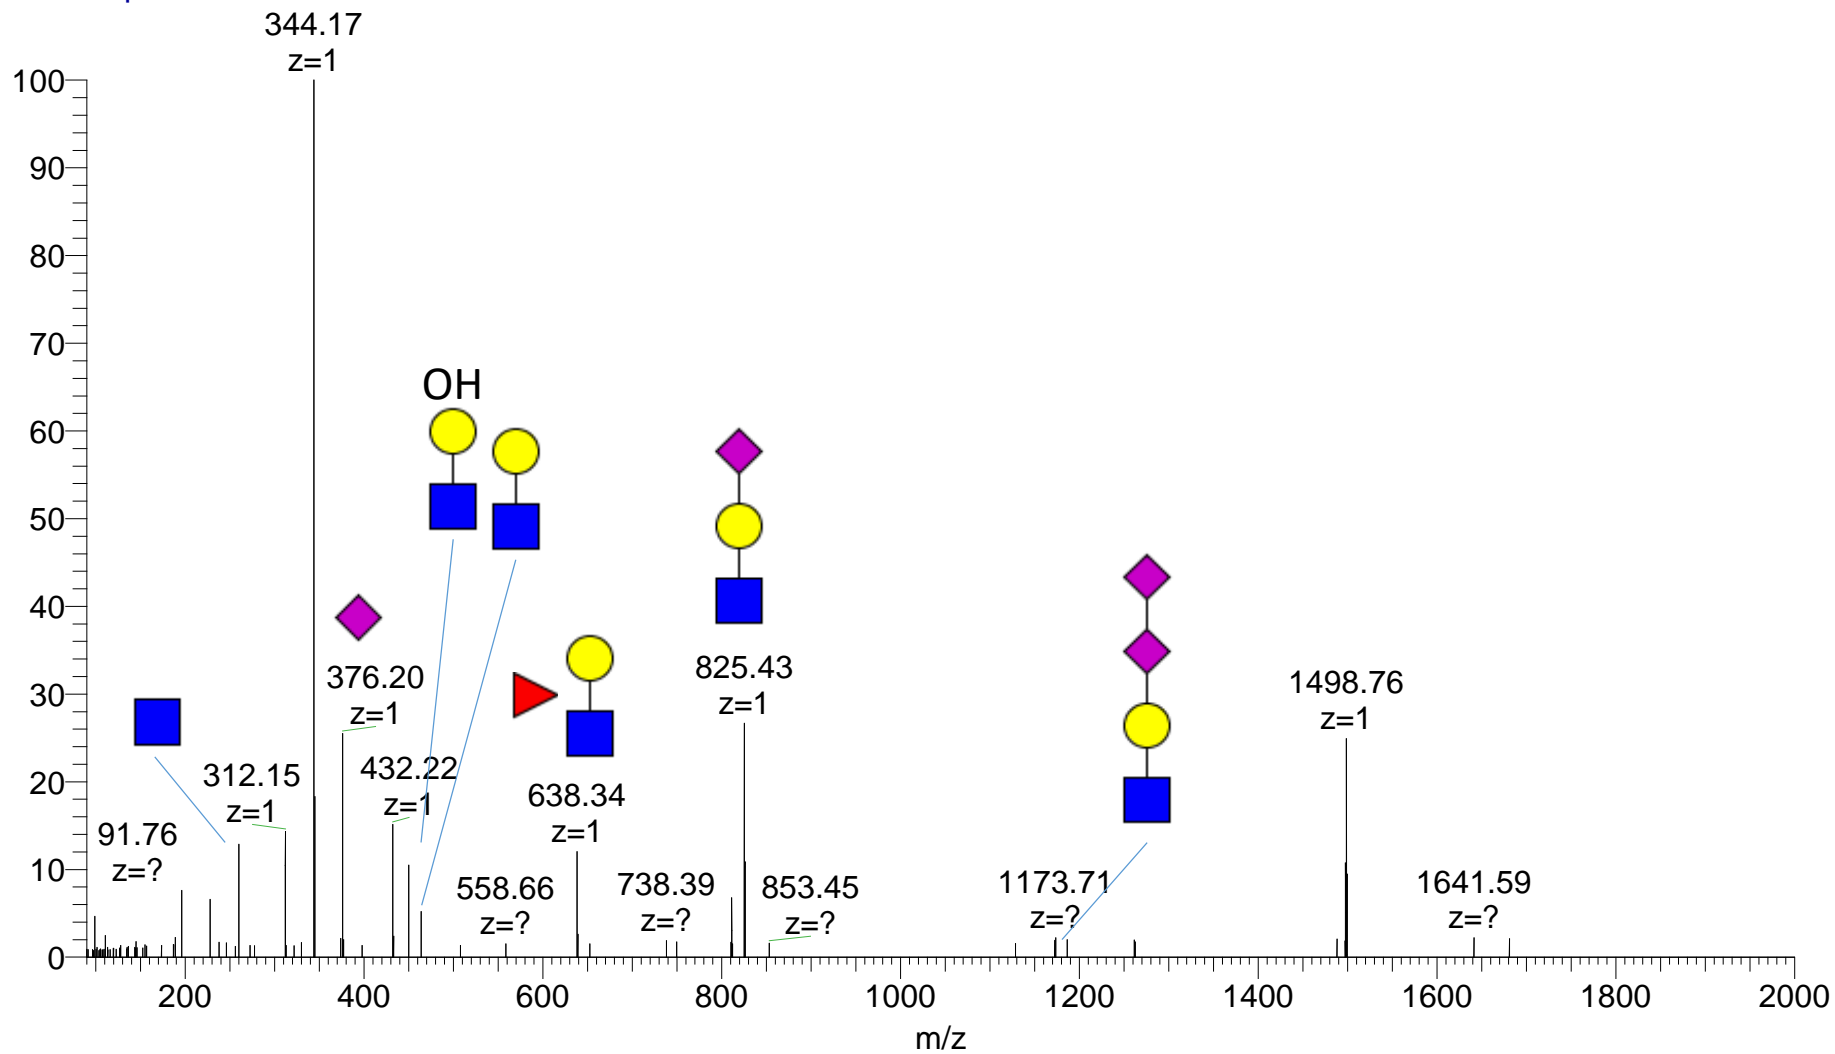

mbrain\_NG #25889 RT: 57.50 AV: 1 NL: 1.77E5

T: FTMS + p NSI d Full ms2 1513.1061@hcd15.(

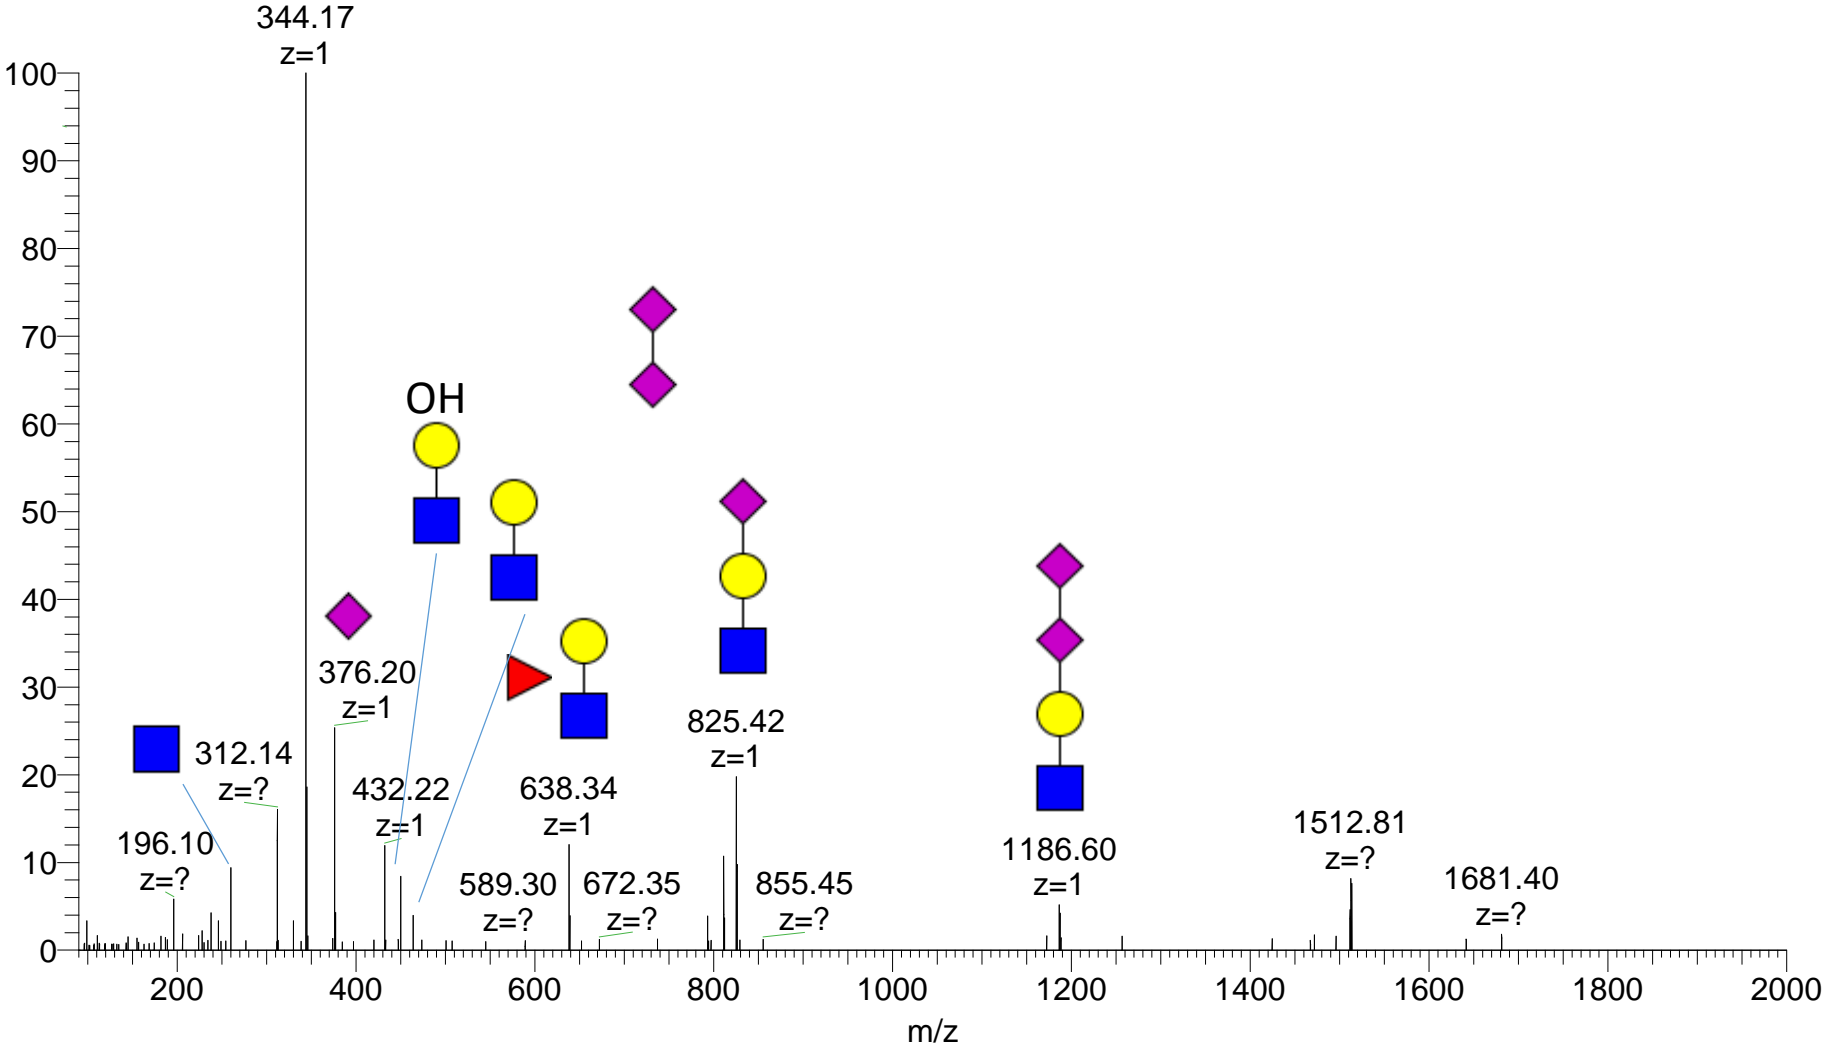

mbrain\_NG #26311 RT: 58.11 AV: 1 NL: 2.39E5

T: FTMS + p NSI d Full ms2 1431.7264@hcd15.(

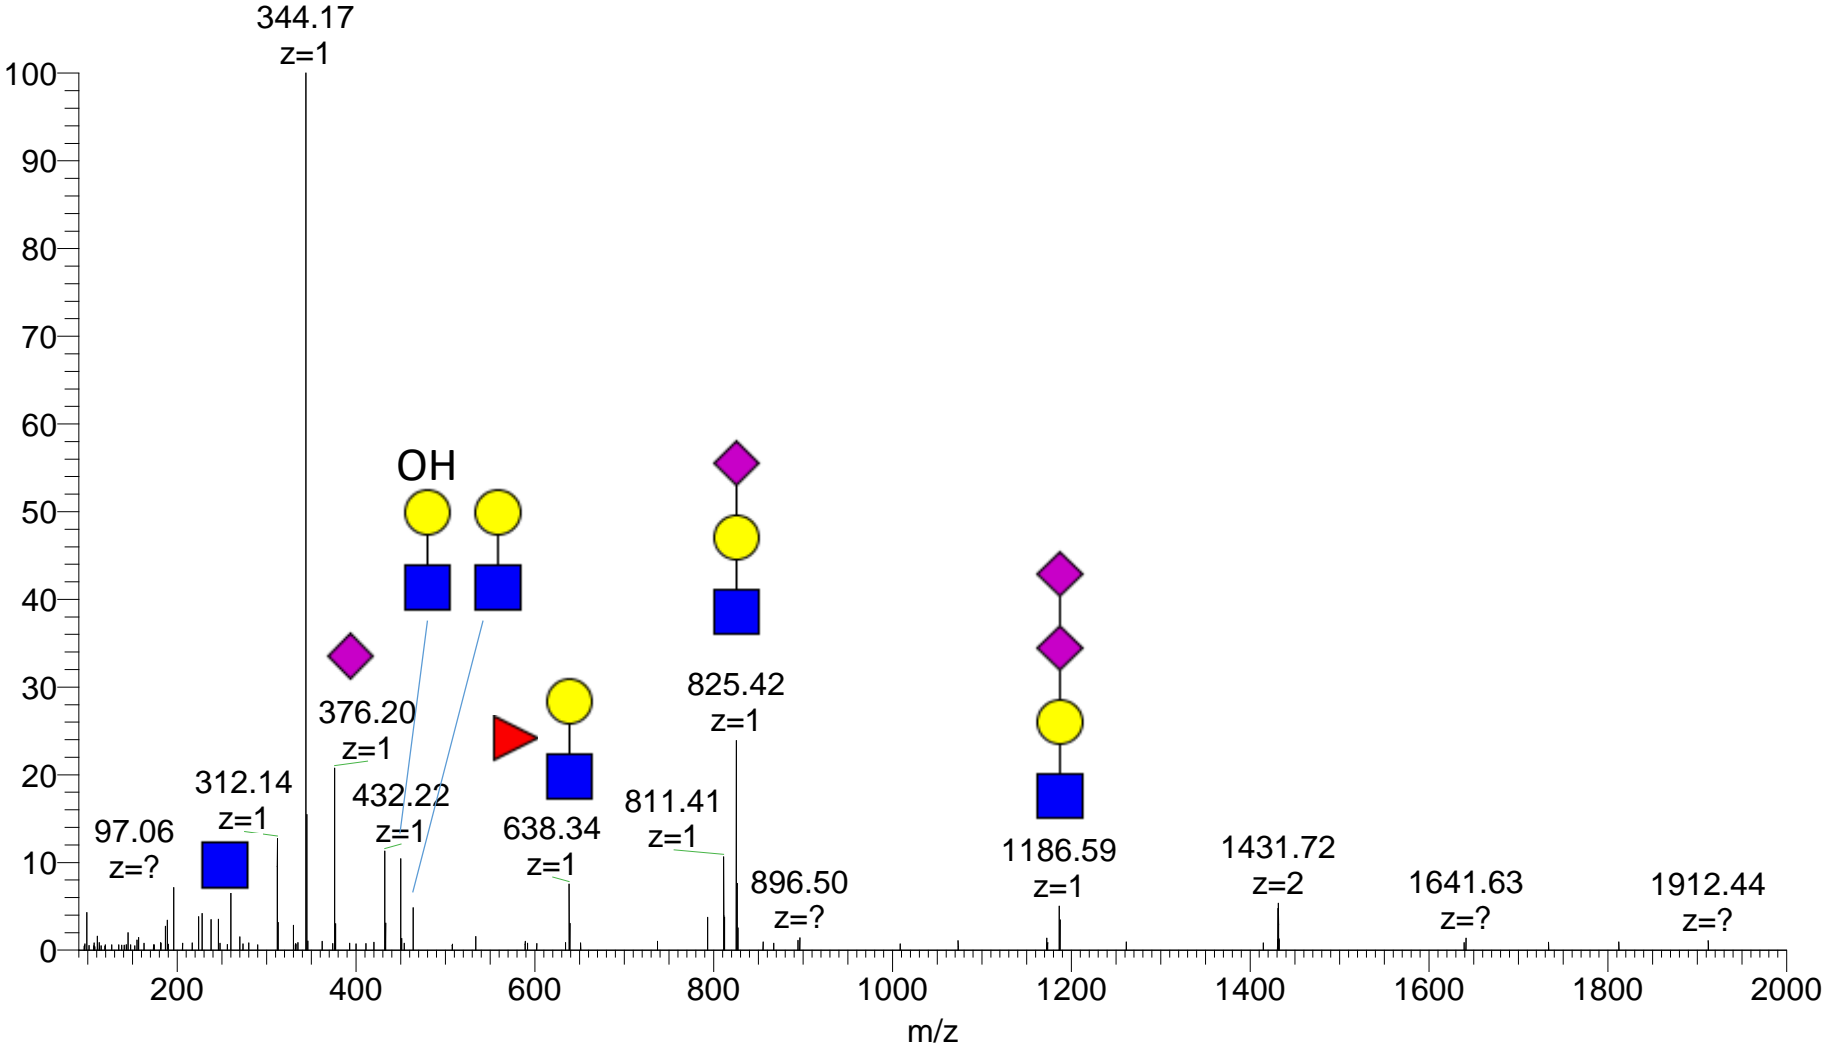

mbrain\_NG #26358 RT: 58.17 AV: 1 NL: 1.05E5

T: FTMS + p NSI d Full ms2 1600.4753@hcd15.(

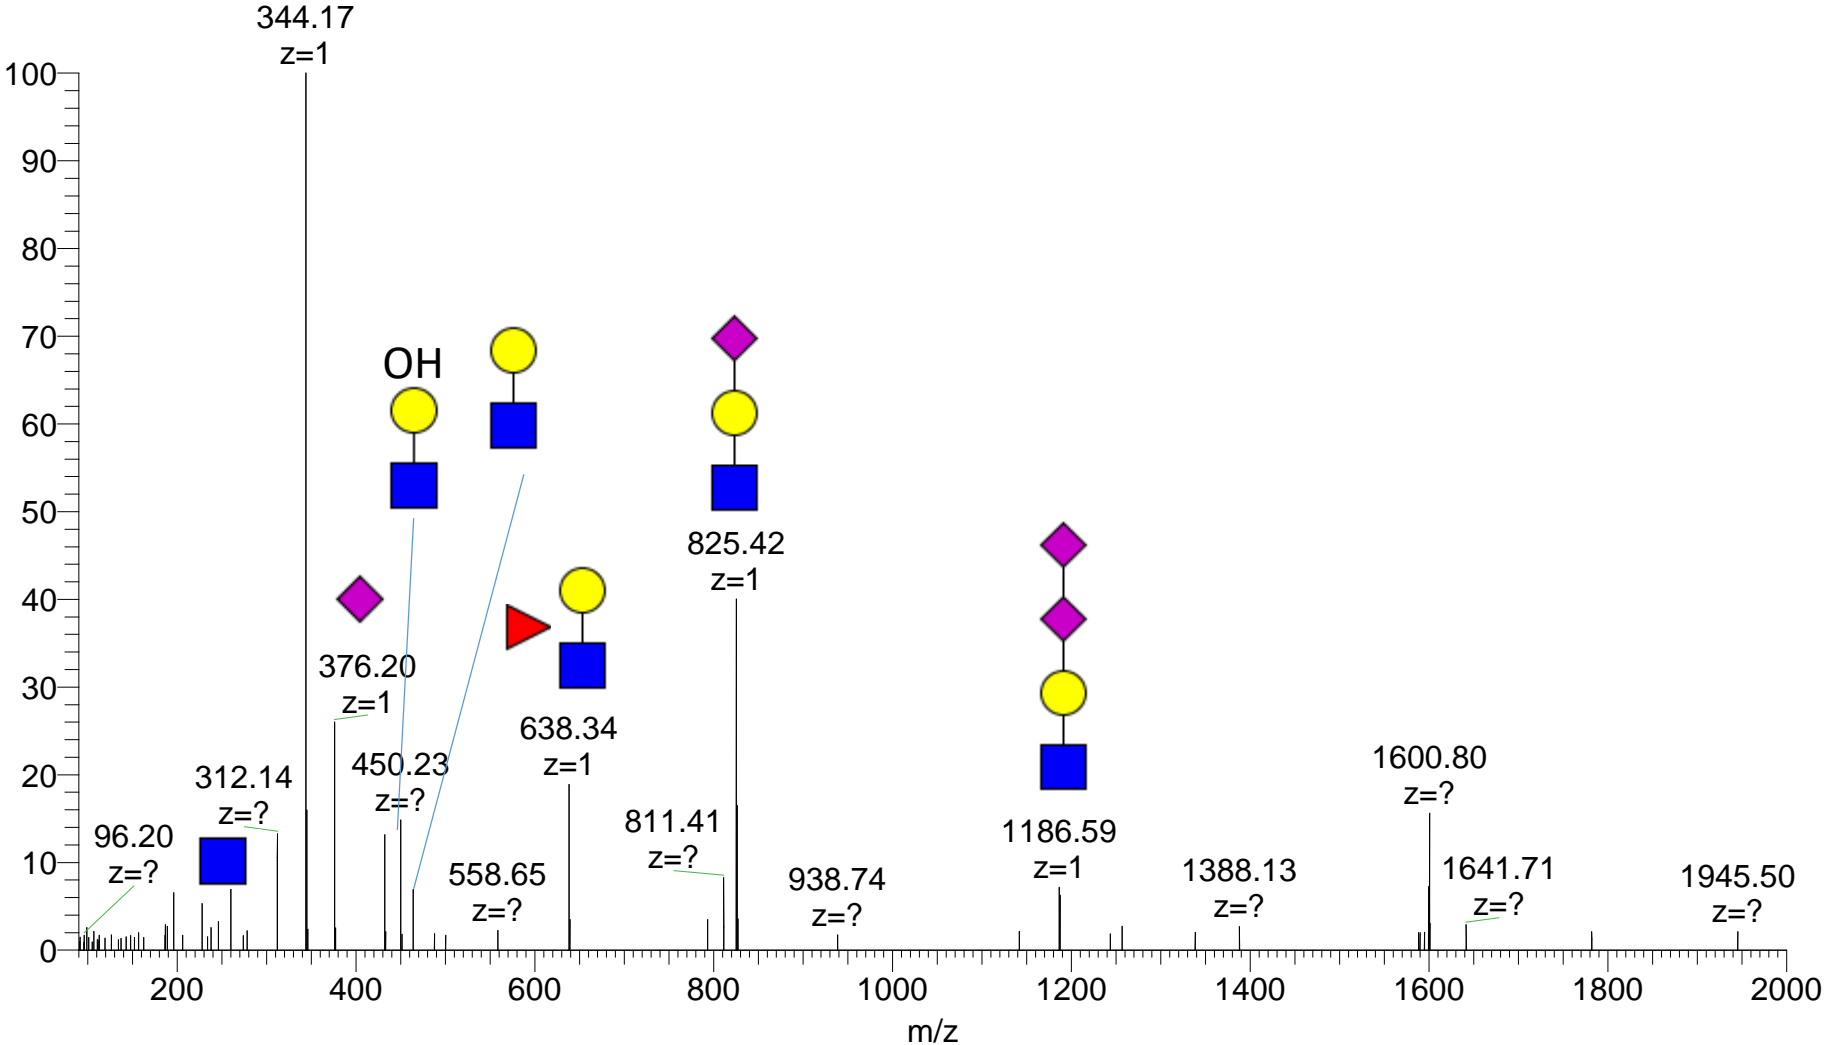



mbrain\_NG #26548 RT: 58.44 AV: 1 NL: 5.53E5

T: FTMS + p NSI d Full ms2 1330.3496@hcd15.(

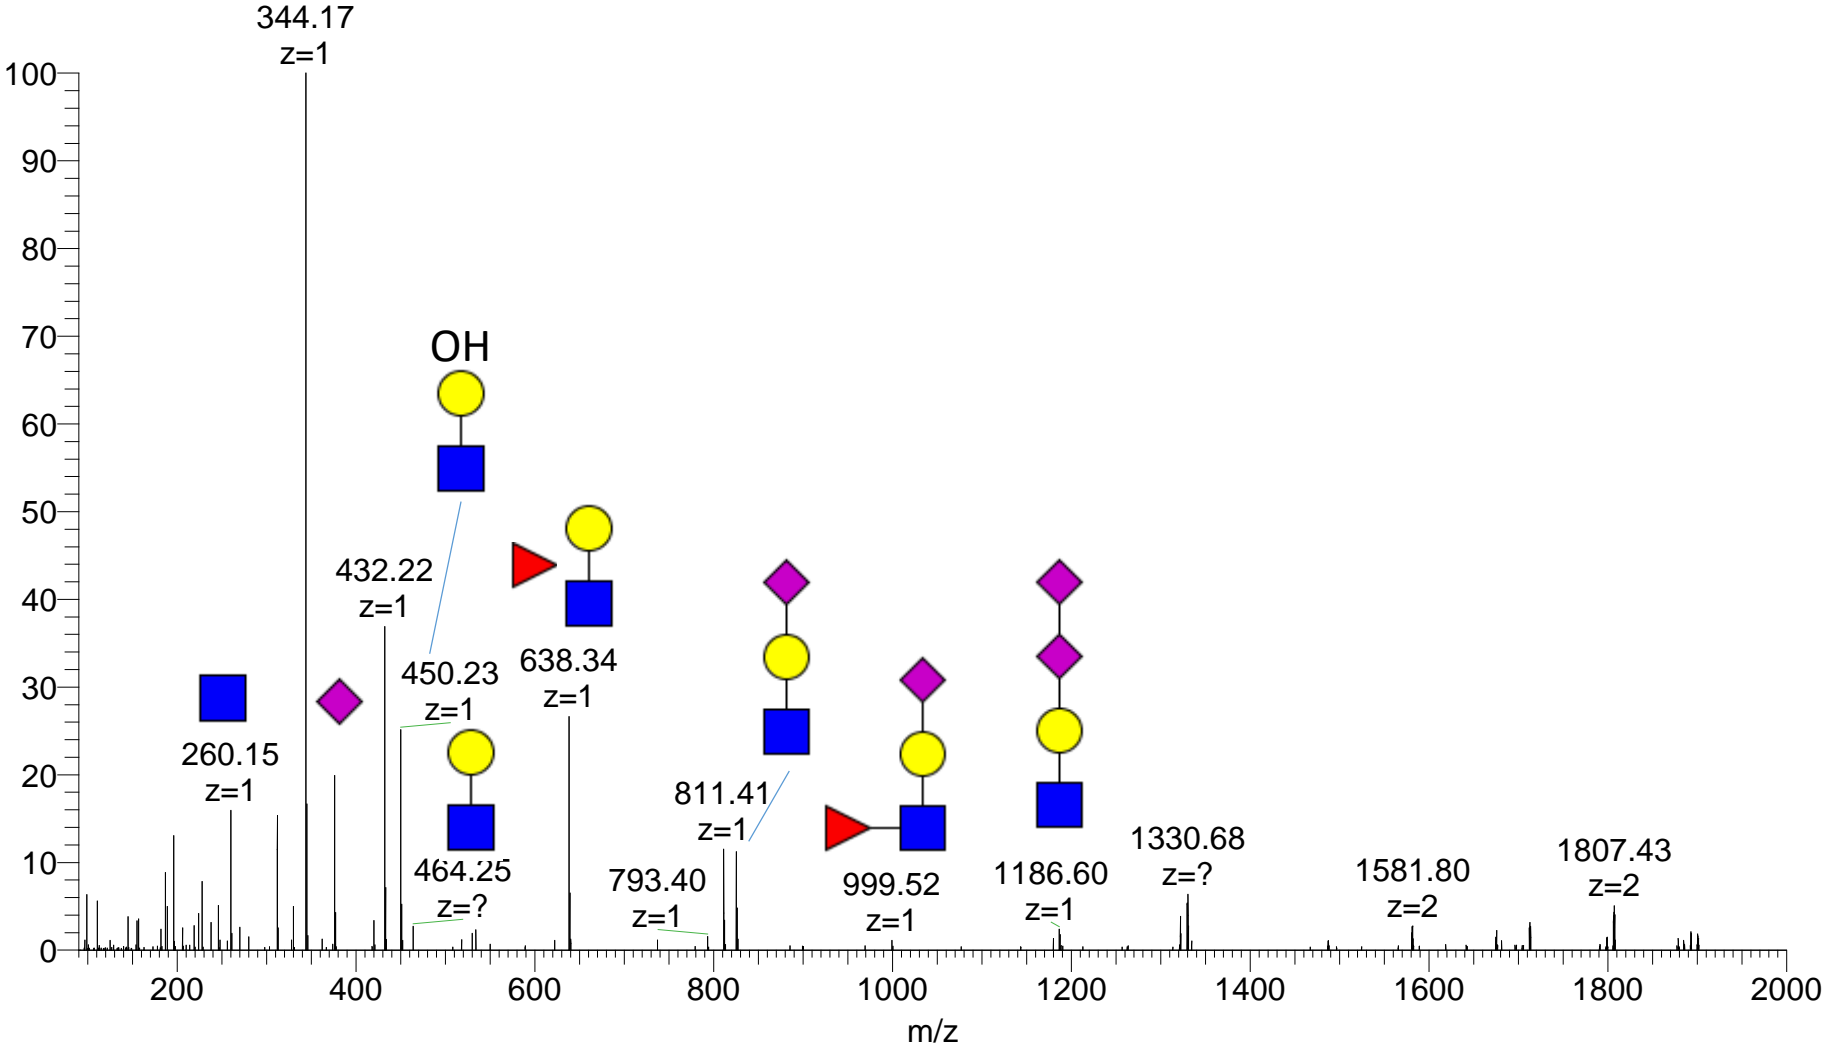

mbrain\_NG #26563 RT: 58.46 AV: 1 NL: 3.56E5

T: FTMS + p NSI d Full ms2 1258.6421@hcd15.(

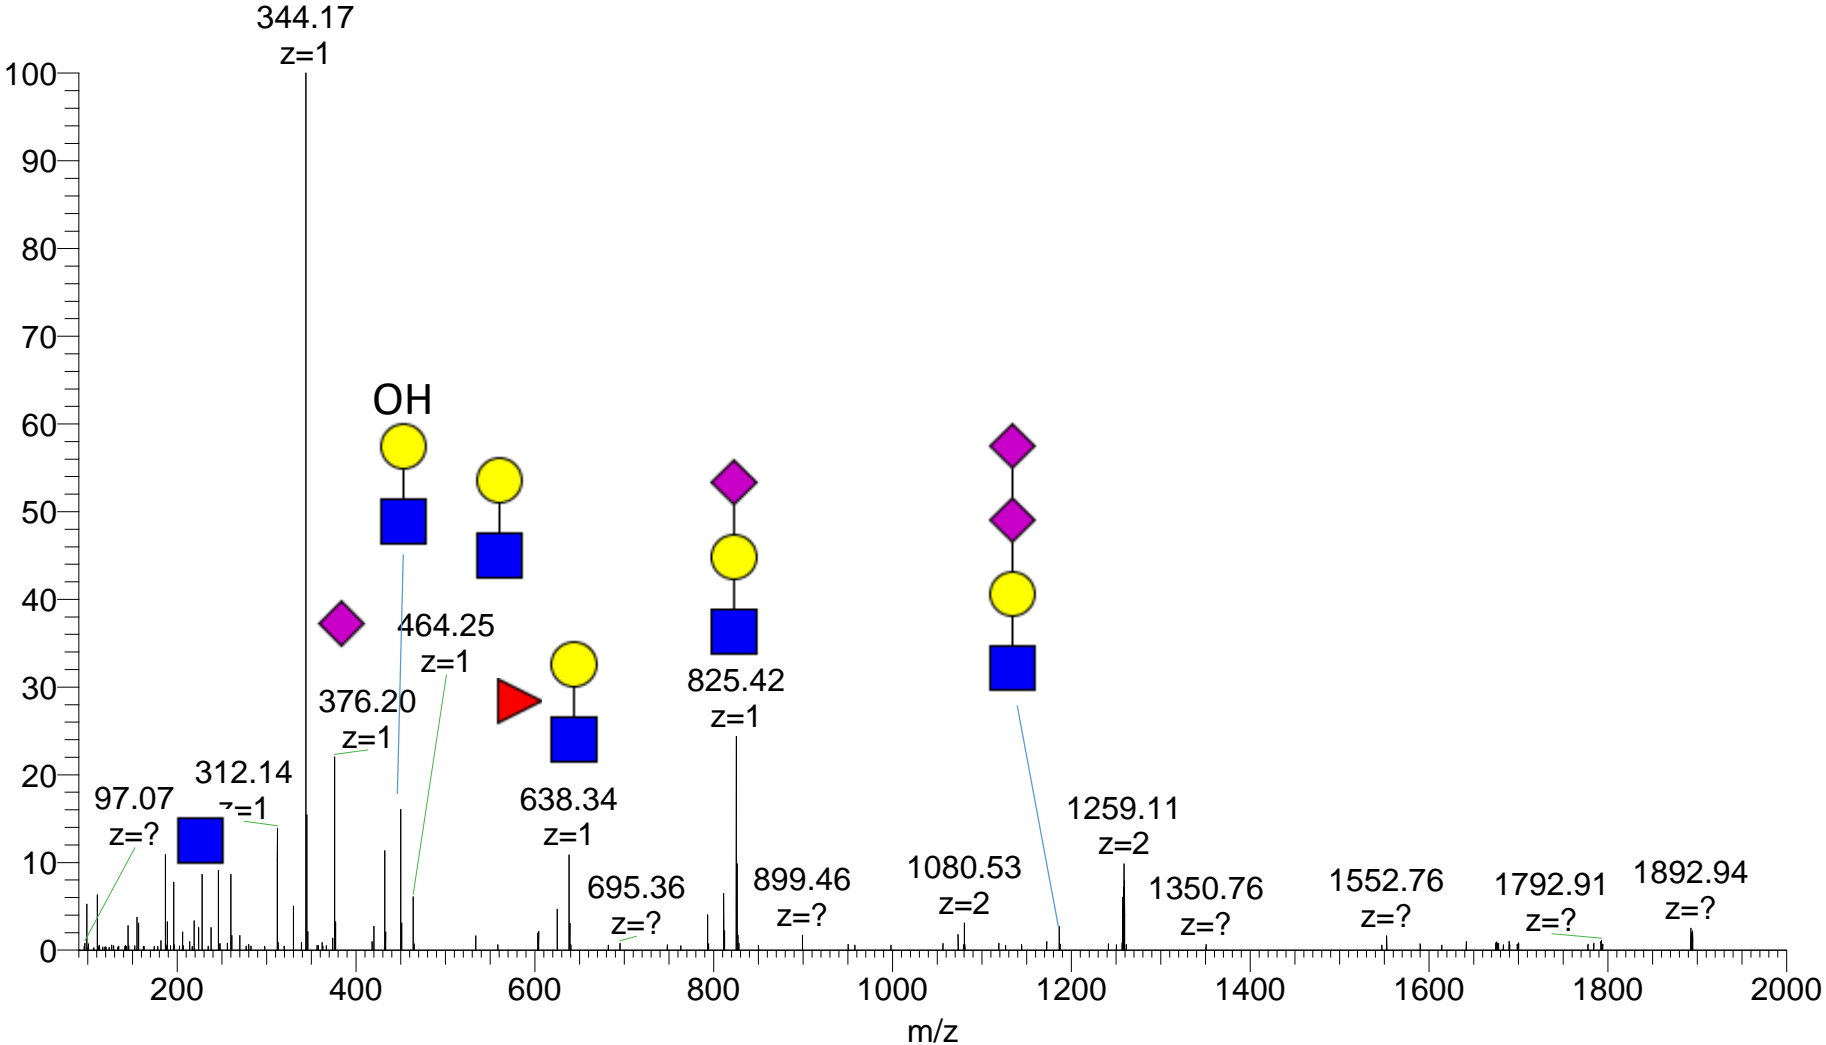

mbrain\_NG #26654 RT: 58.58 AV: 1 NL: 5.13E4  
T: FTMS + p NSI d Full ms2 1658.8339@hcd15.(

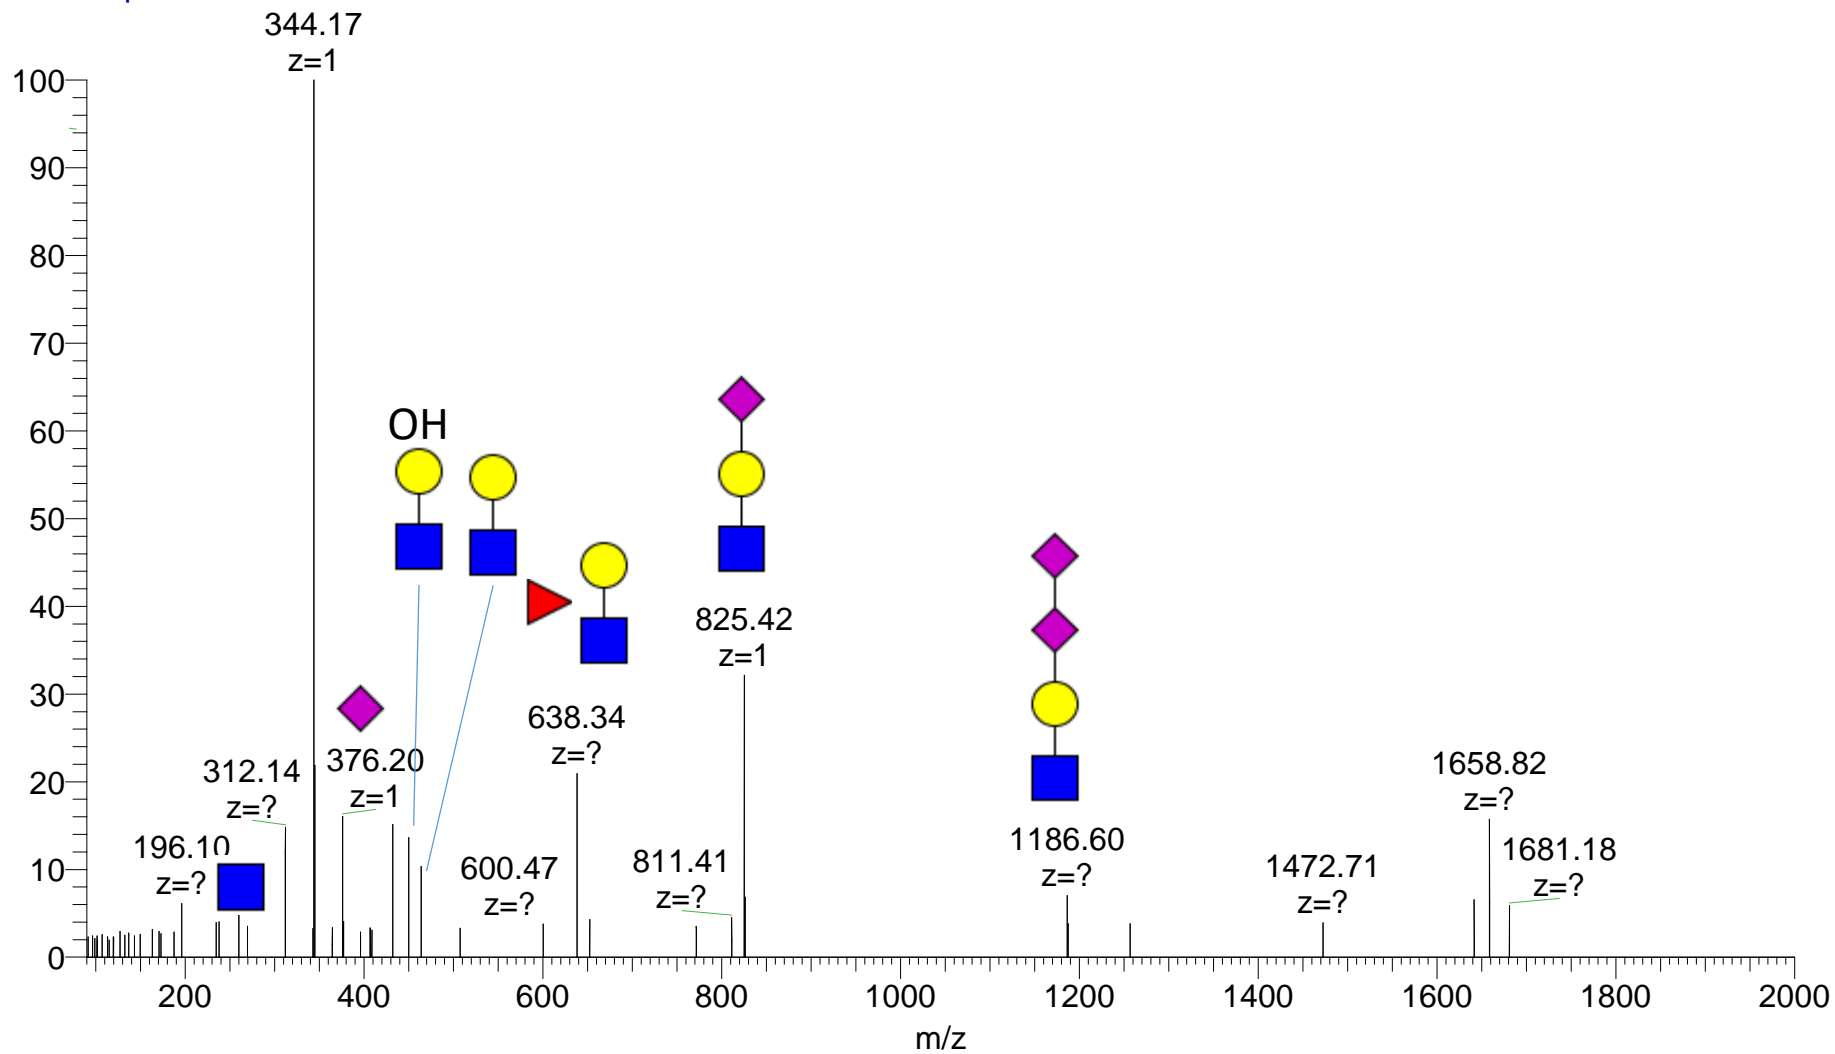

mbrain\_NG #26854 RT: 58.85 AV: 1 NL: 1.59E5

T: FTMS + p NSI d Full ms2 1450.7291@hcd15.(

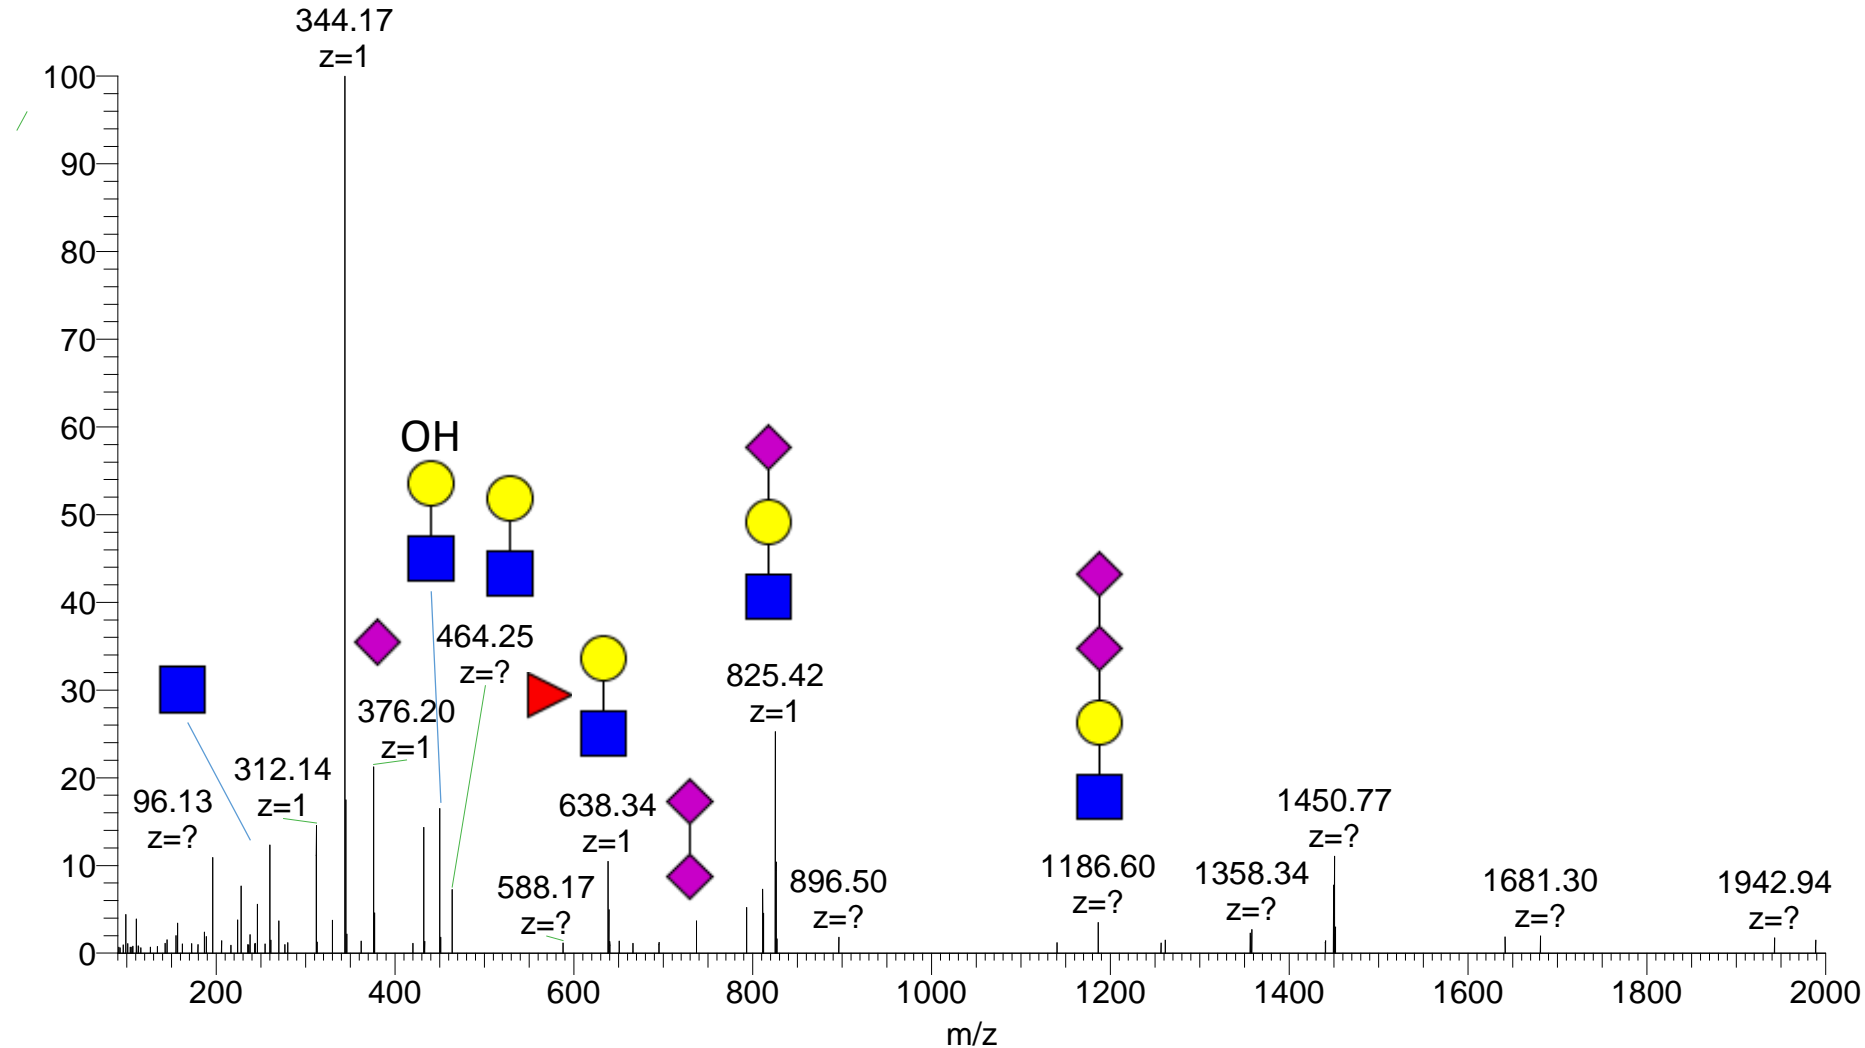

mbrain\_NG #26926 RT: 58.95 AV: 1 NL: 1.02E5

T: FTMS + p NSI d Full ms2 1668.5150@hcd15.(

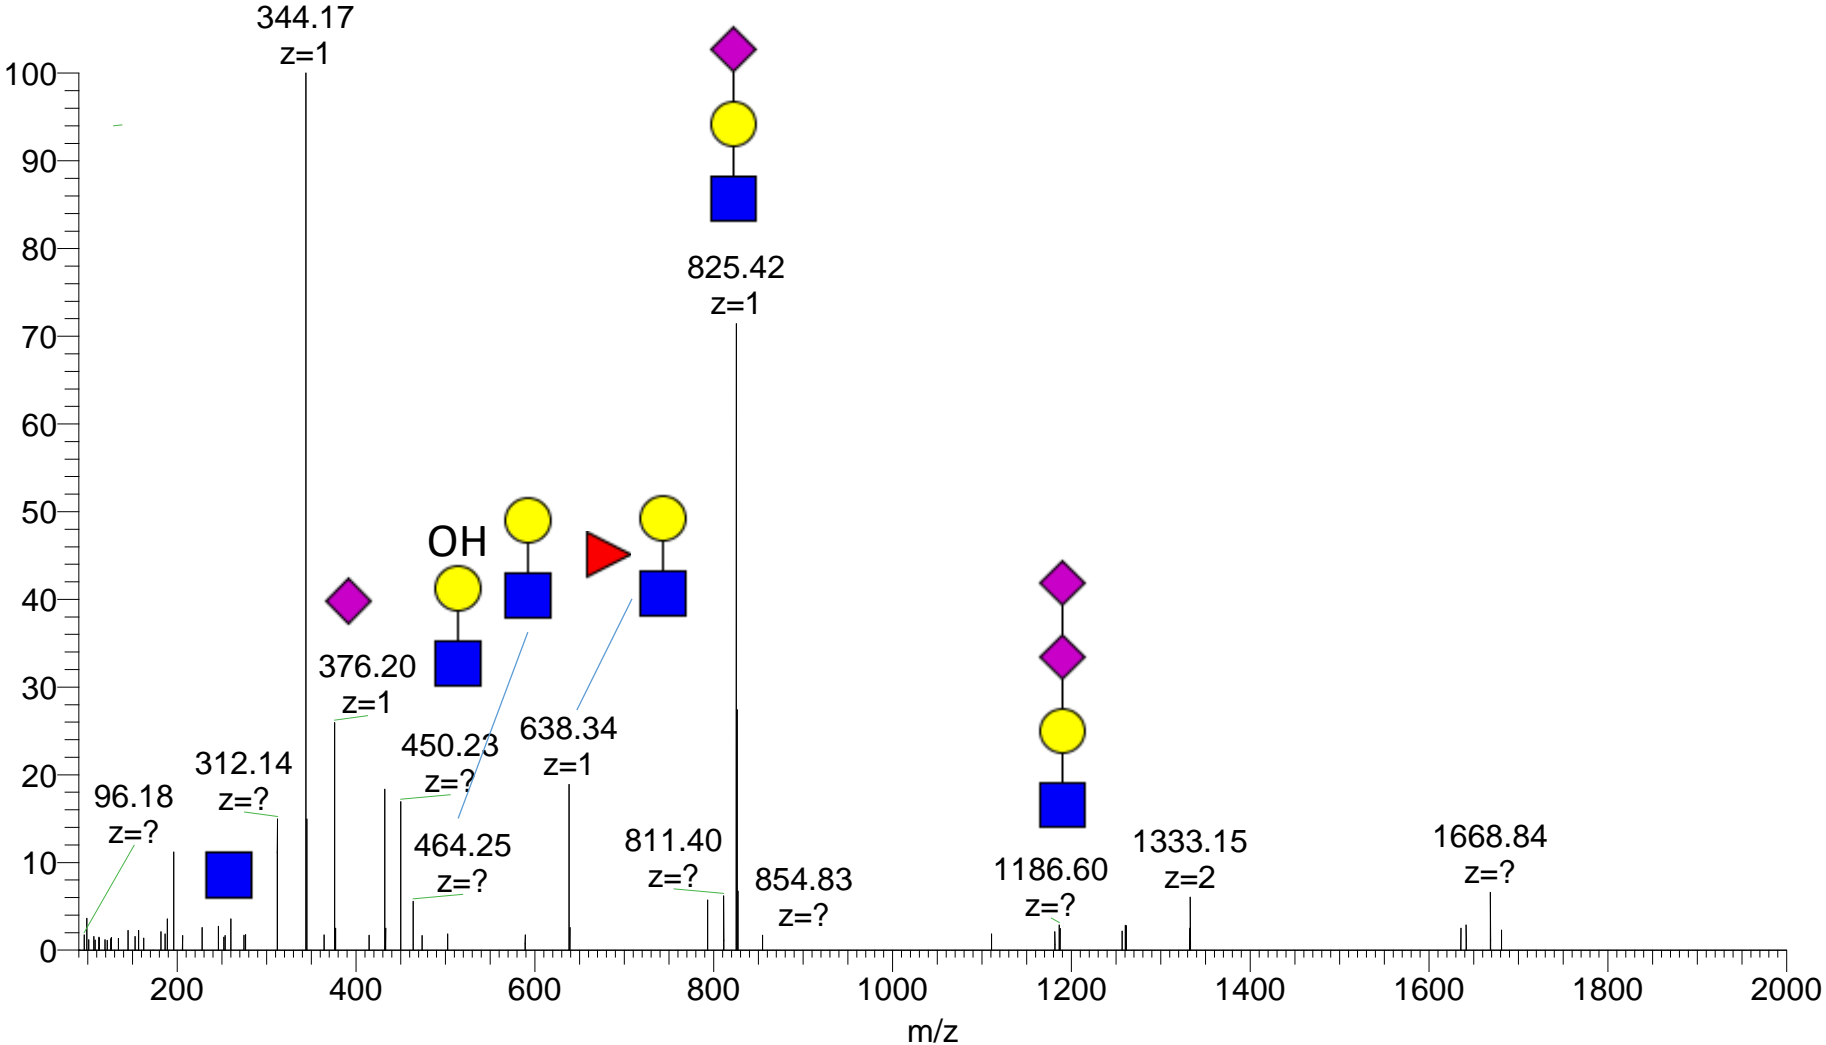

mbrain\_NG #26995 RT: 59.06 AV: 1 NL: 2.38E5  
T: FTMS + p NSI d Full ms2 1382.7008@hcd15.(

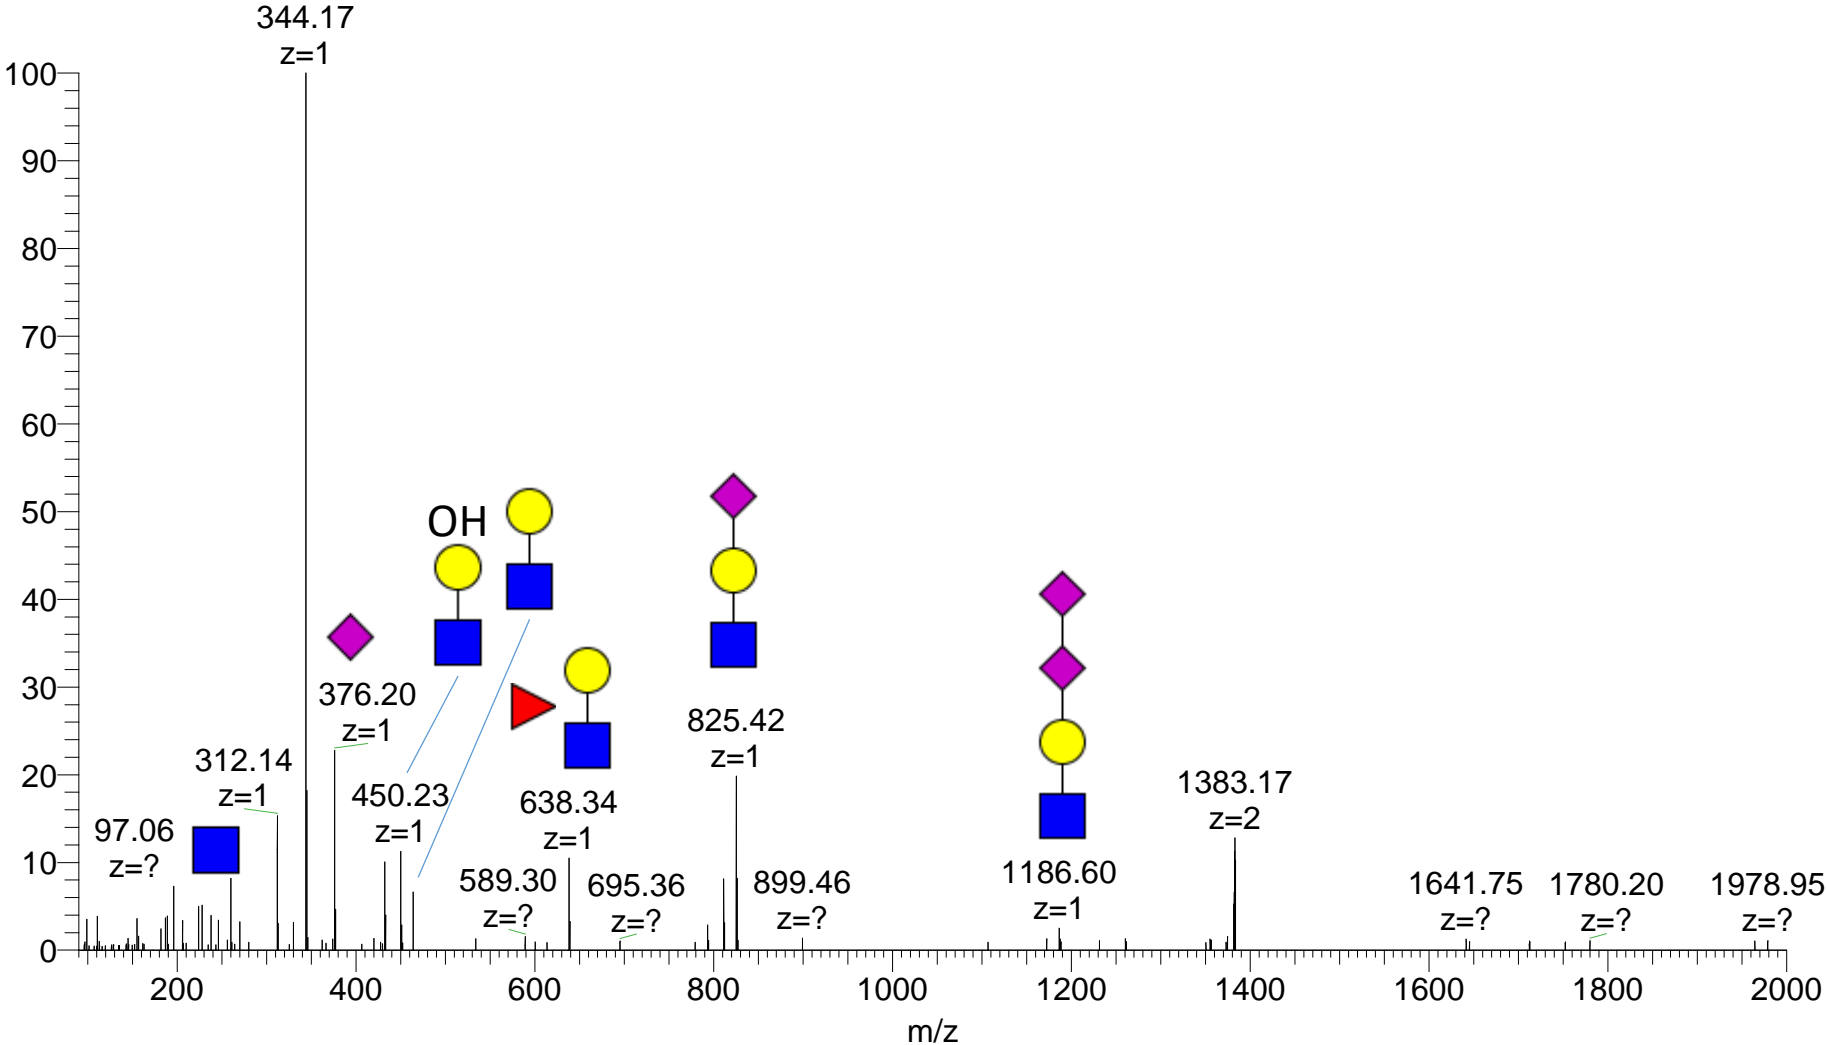

mbrain\_NG #27235 RT: 59.38 AV: 1 NL: 9.12E4  
T: FTMS + p NSI d Full ms2 1595.8149@hcd15.(

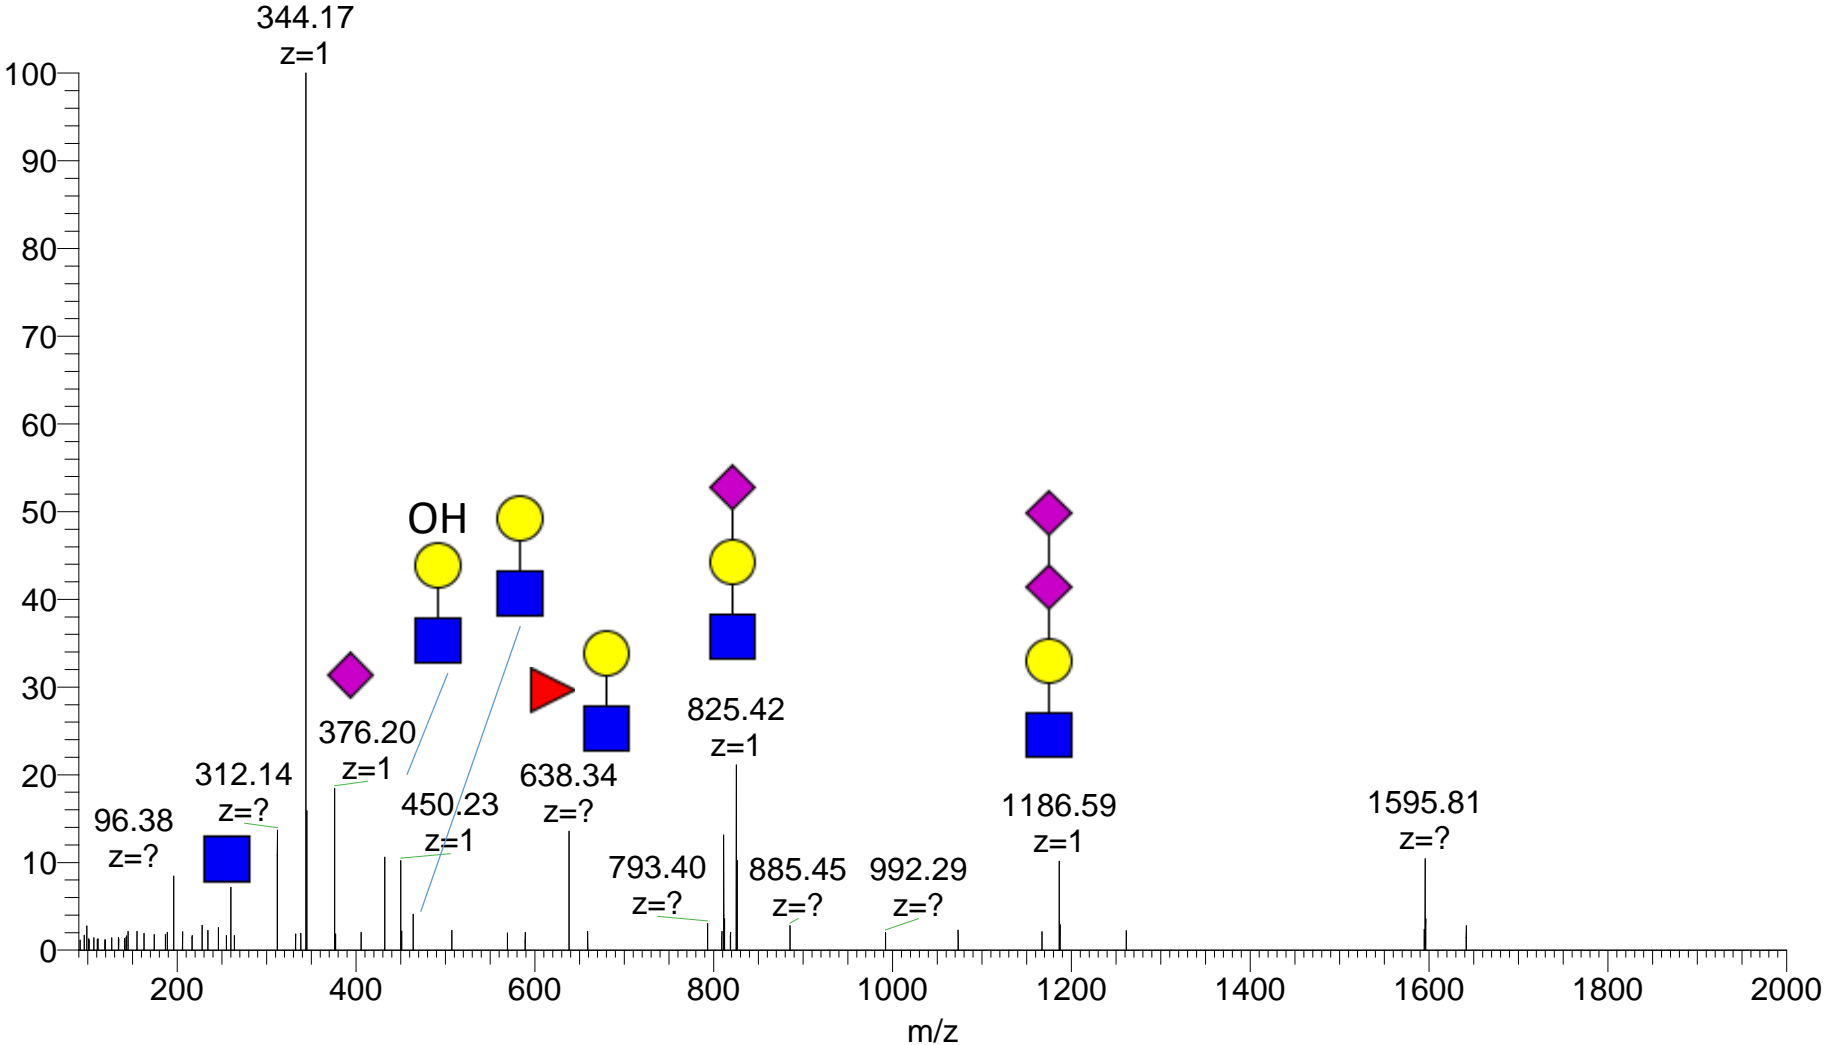

mbrain\_NG #27324 RT: 59.51 AV: 1 NL: 3.32E5

T: FTMS + p NSI d Full ms2 1264.6427@hcd15.(

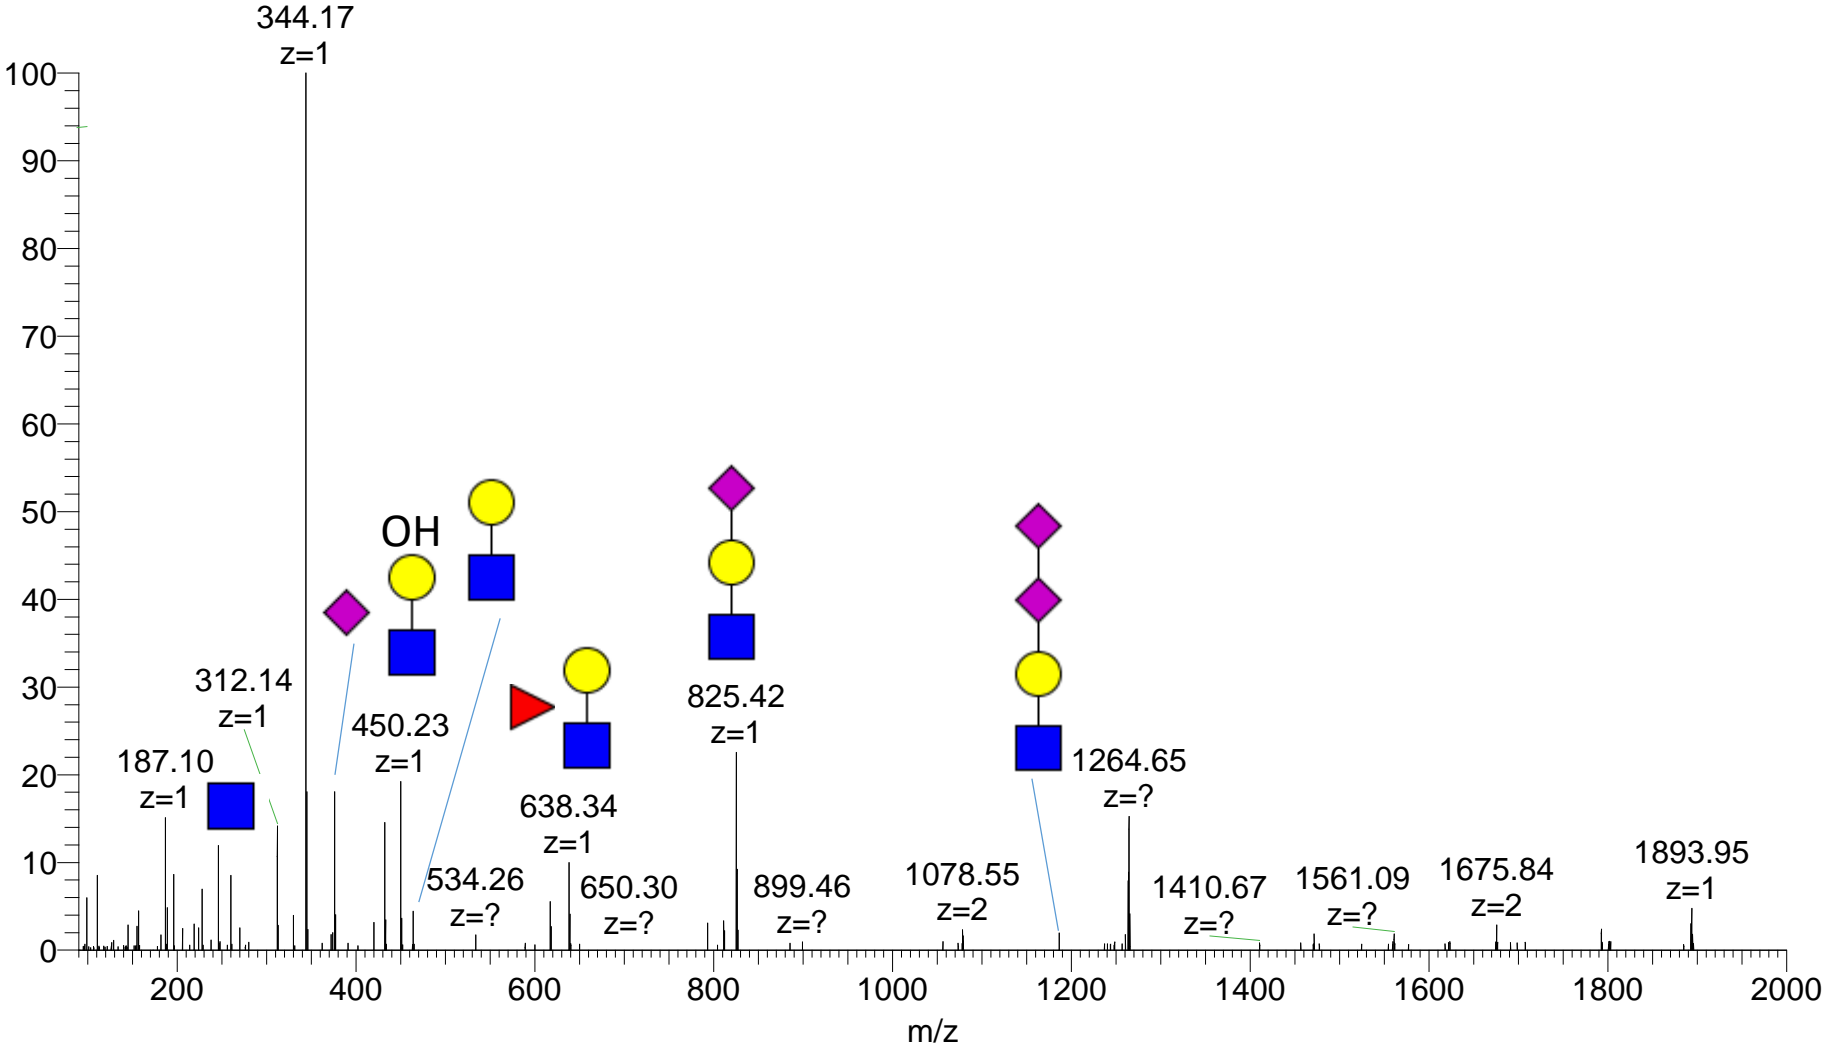



mbrain\_NG #27577 RT: 59.85 AV: 1 NL: 2.70E5

T: FTMS + p NSI d Full ms2 1418.0703@hcd15.(

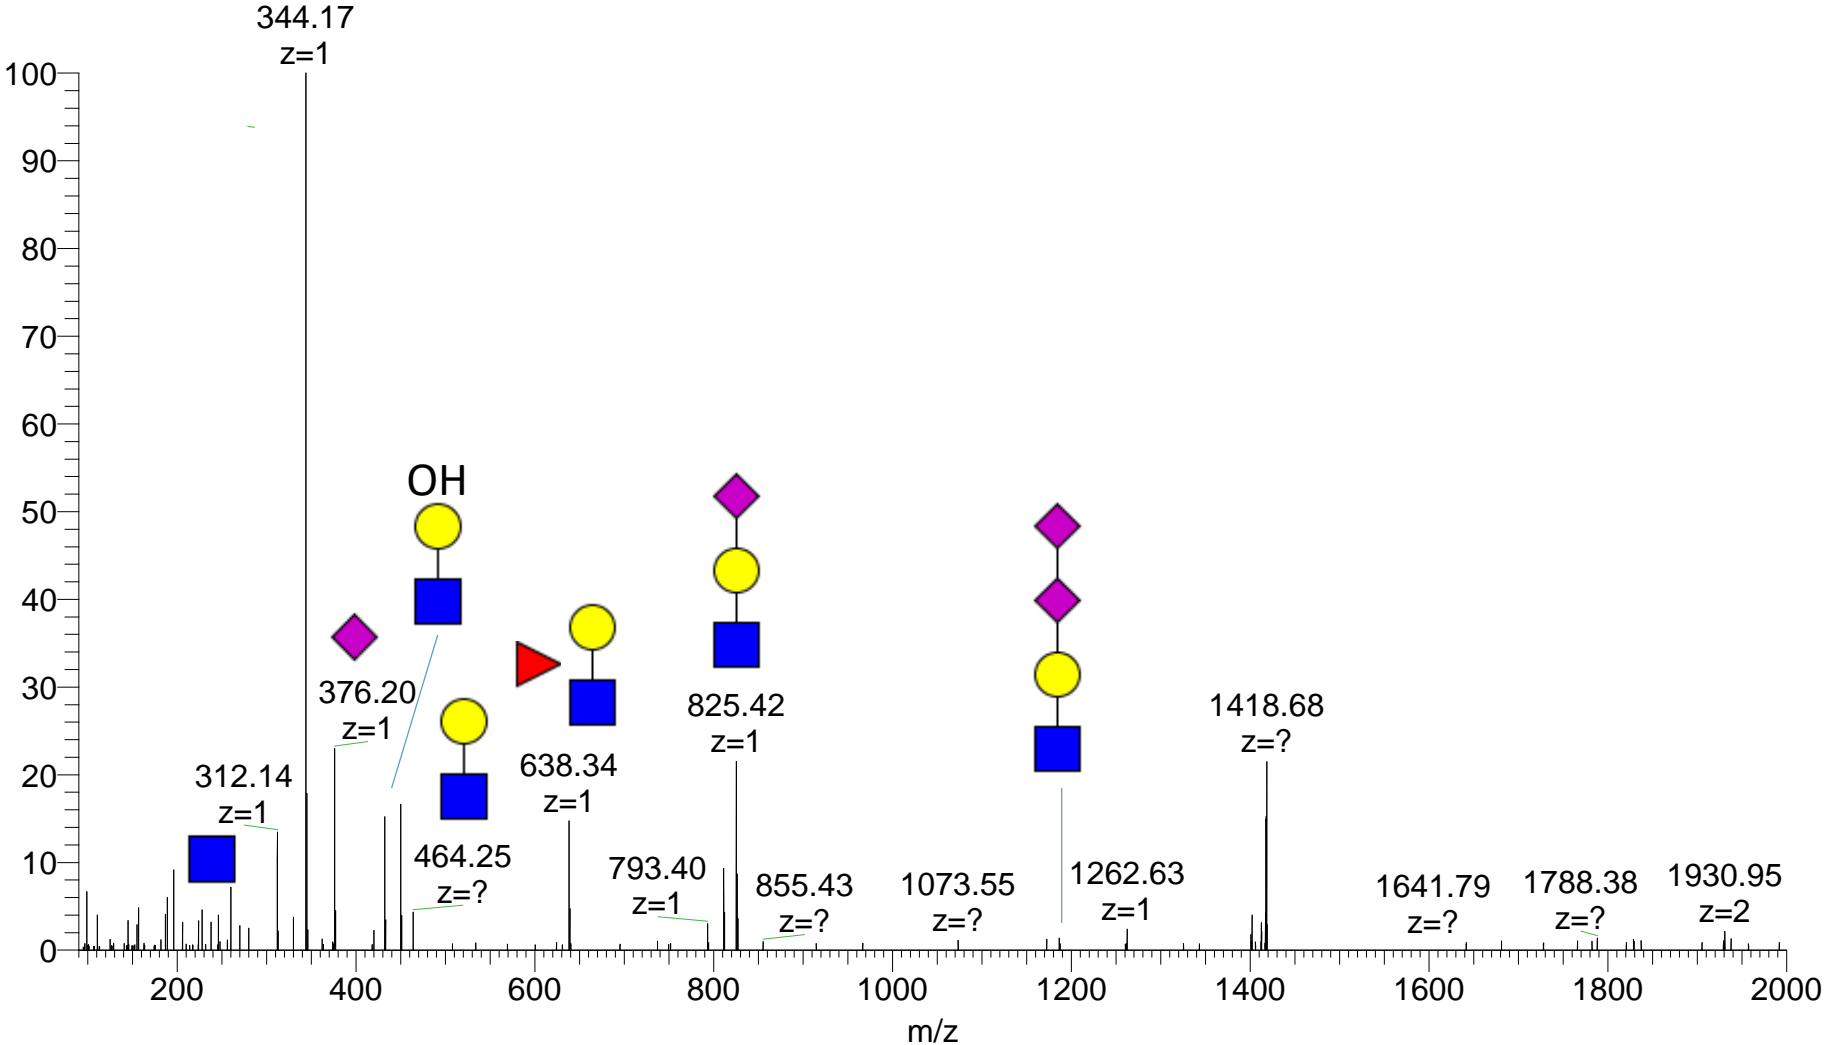

mbrain\_NG #27875 RT: 60.26 AV: 1 NL: 1.24E5  
T: FTMS + p NSI d Full ms2 1518.7710@hcd15.(

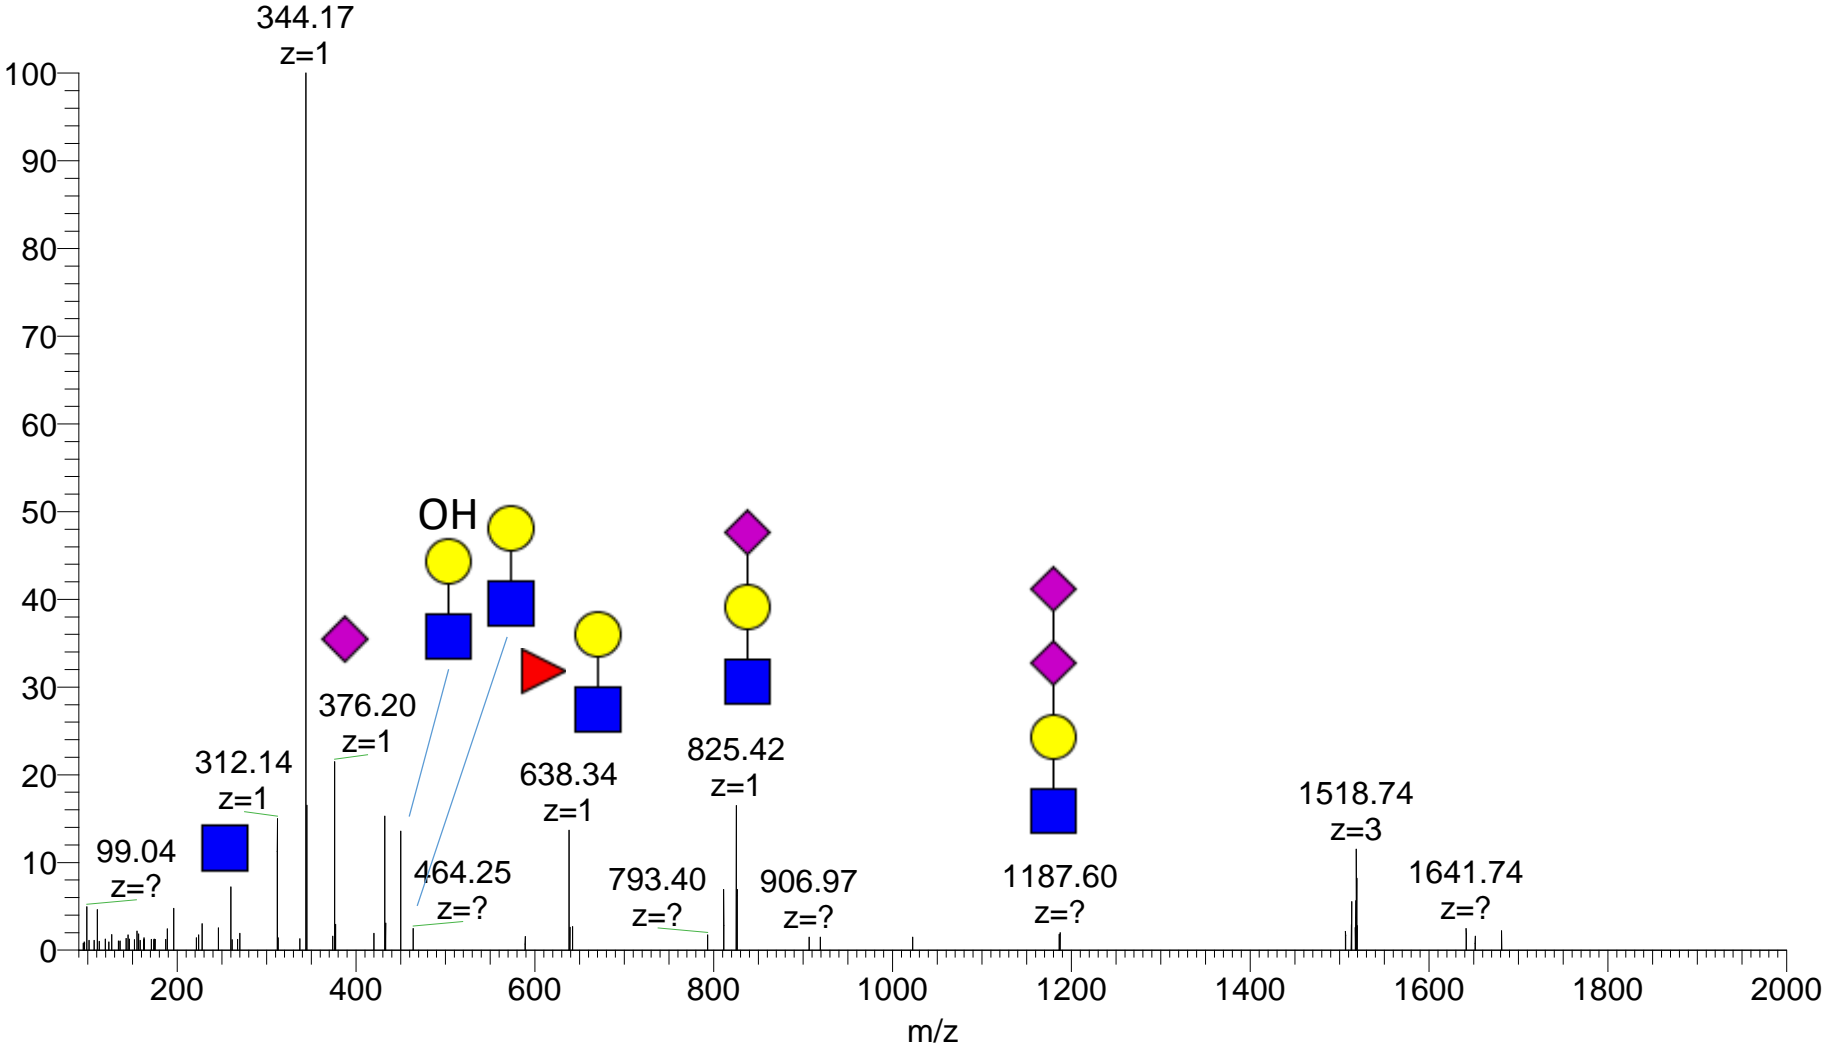

mbrain\_NG #27972 RT: 60.40 AV: 1 NL: 8.30E4

T: FTMS + p NSI d Full ms2 1606.1526@hcd15.(

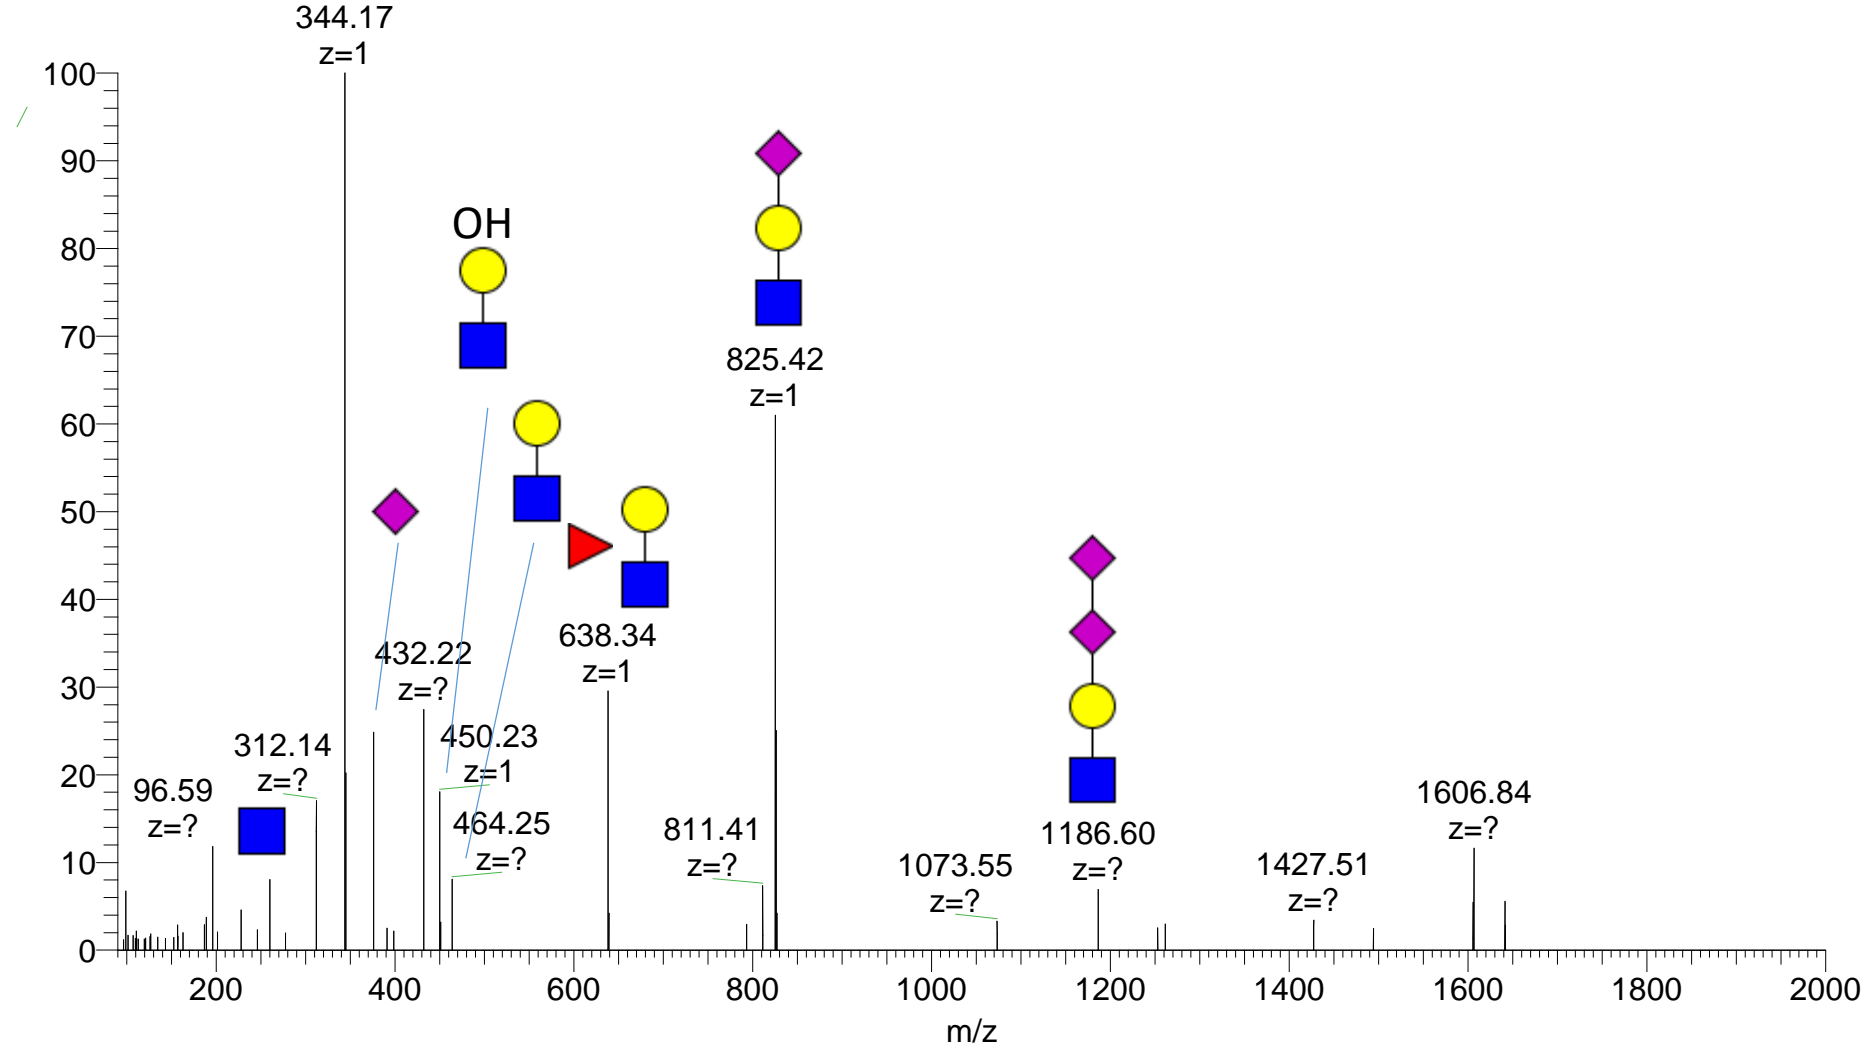

mbrain\_NG #27984 RT: 60.41 AV: 1 NL: 7.51E4  
T: FTMS + p NSI d Full ms2 1551.7856@hcd15.(

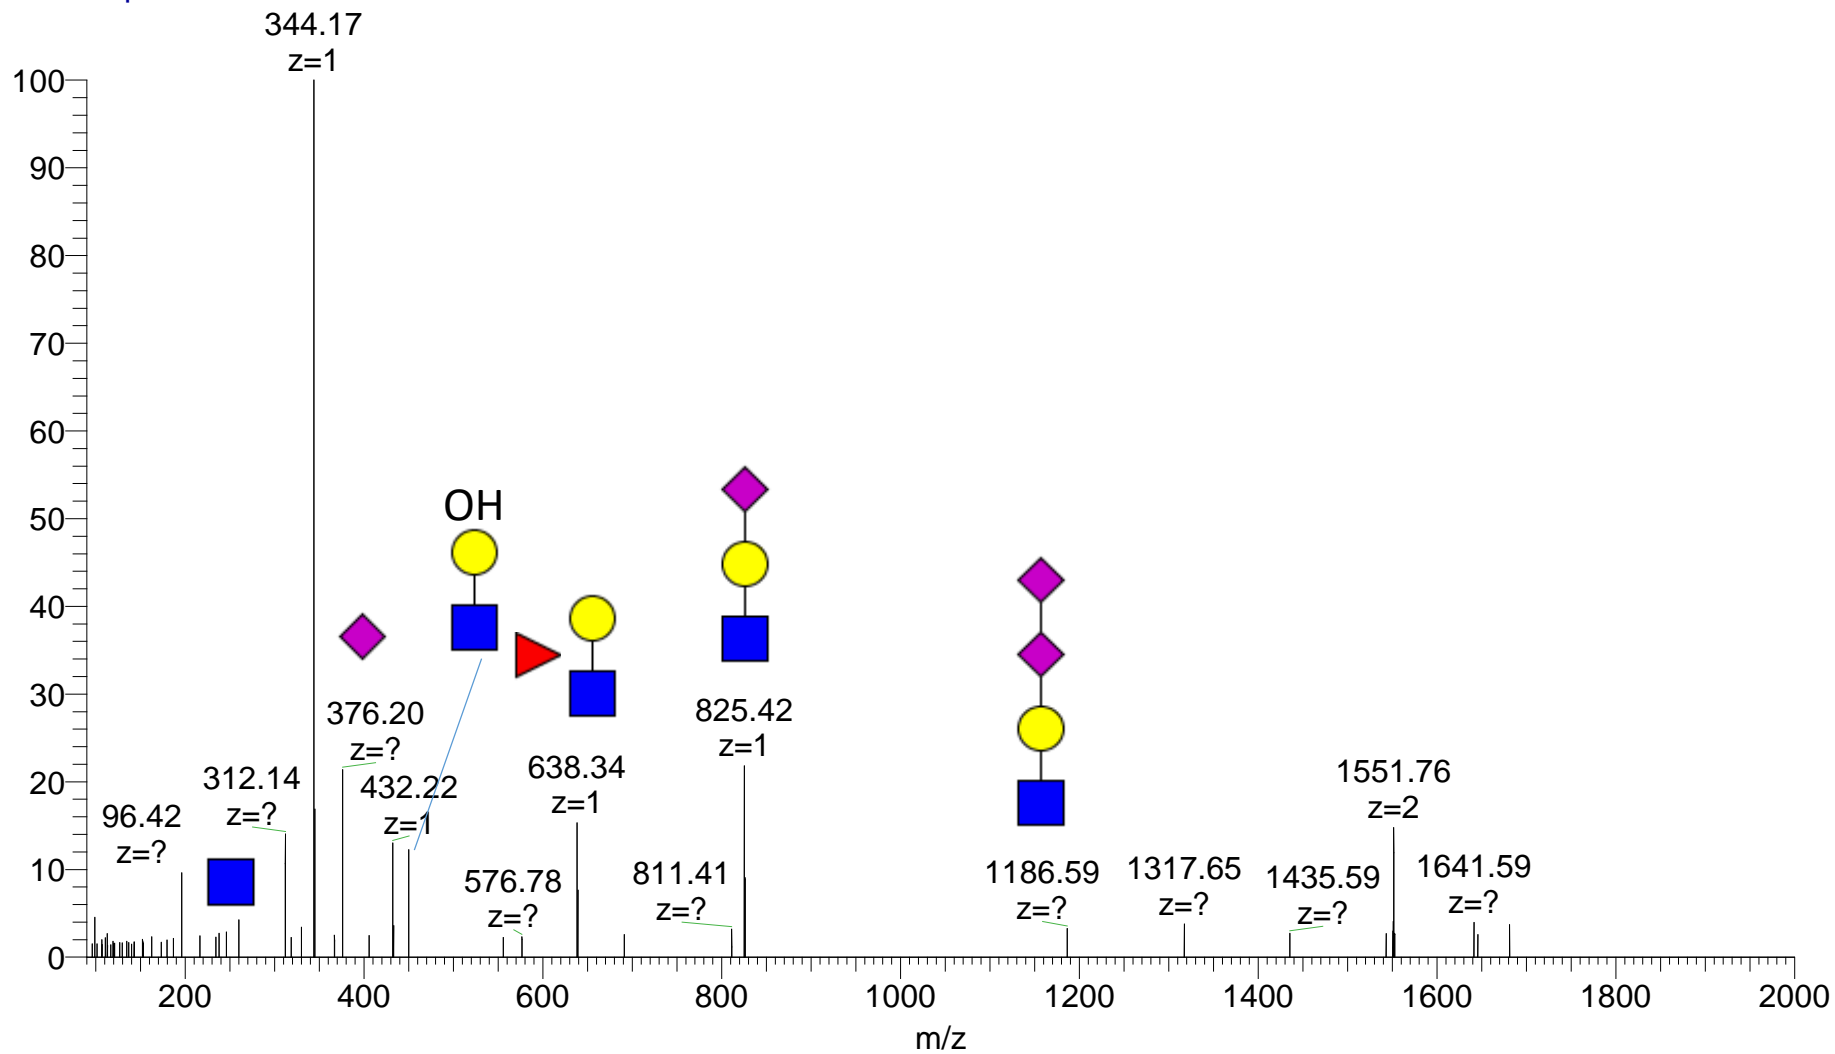

mbrain\_NG #28251 RT: 60.79 AV: 1 NL: 2.31E5

T: FTMS + p NSI d Full ms2 1360.4454@hcd15.(

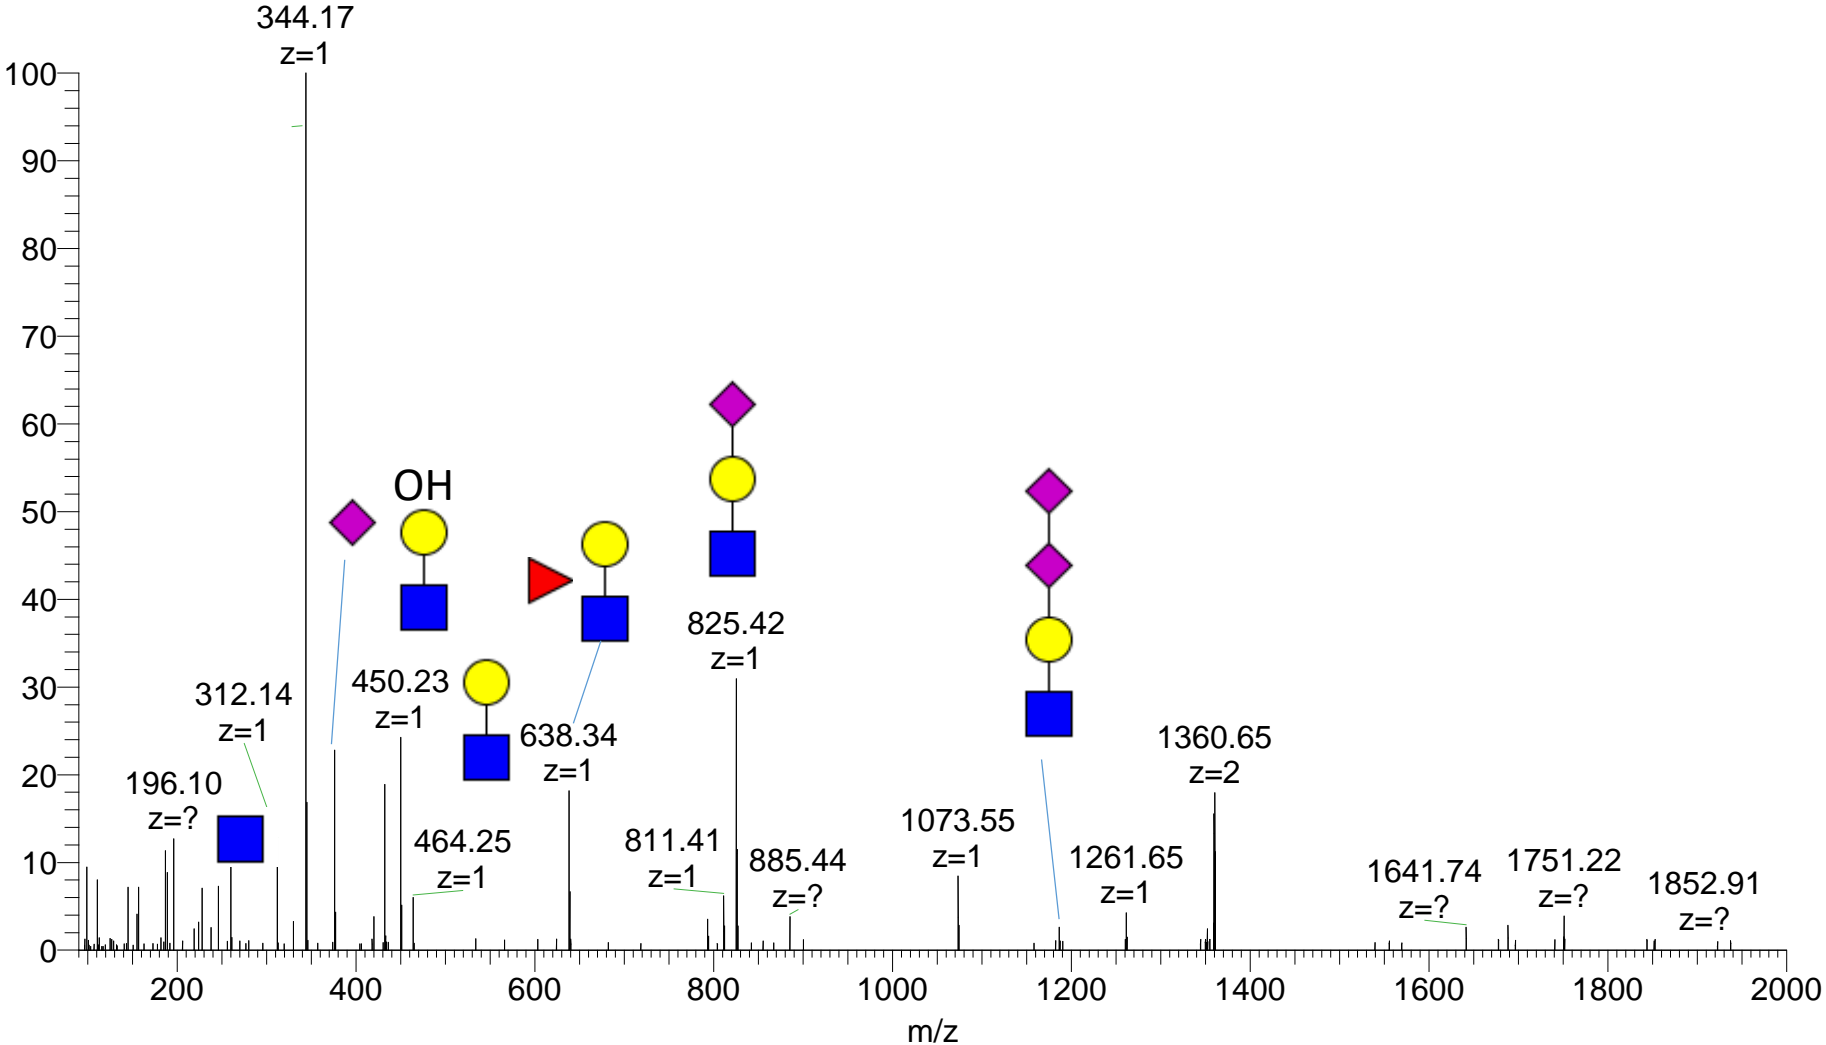

mbrain\_NG #28443 RT: 61.06 AV: 1 NL: 2.06E5  
T: FTMS + p NSI d Full ms2 1192.6127@hcd15.(

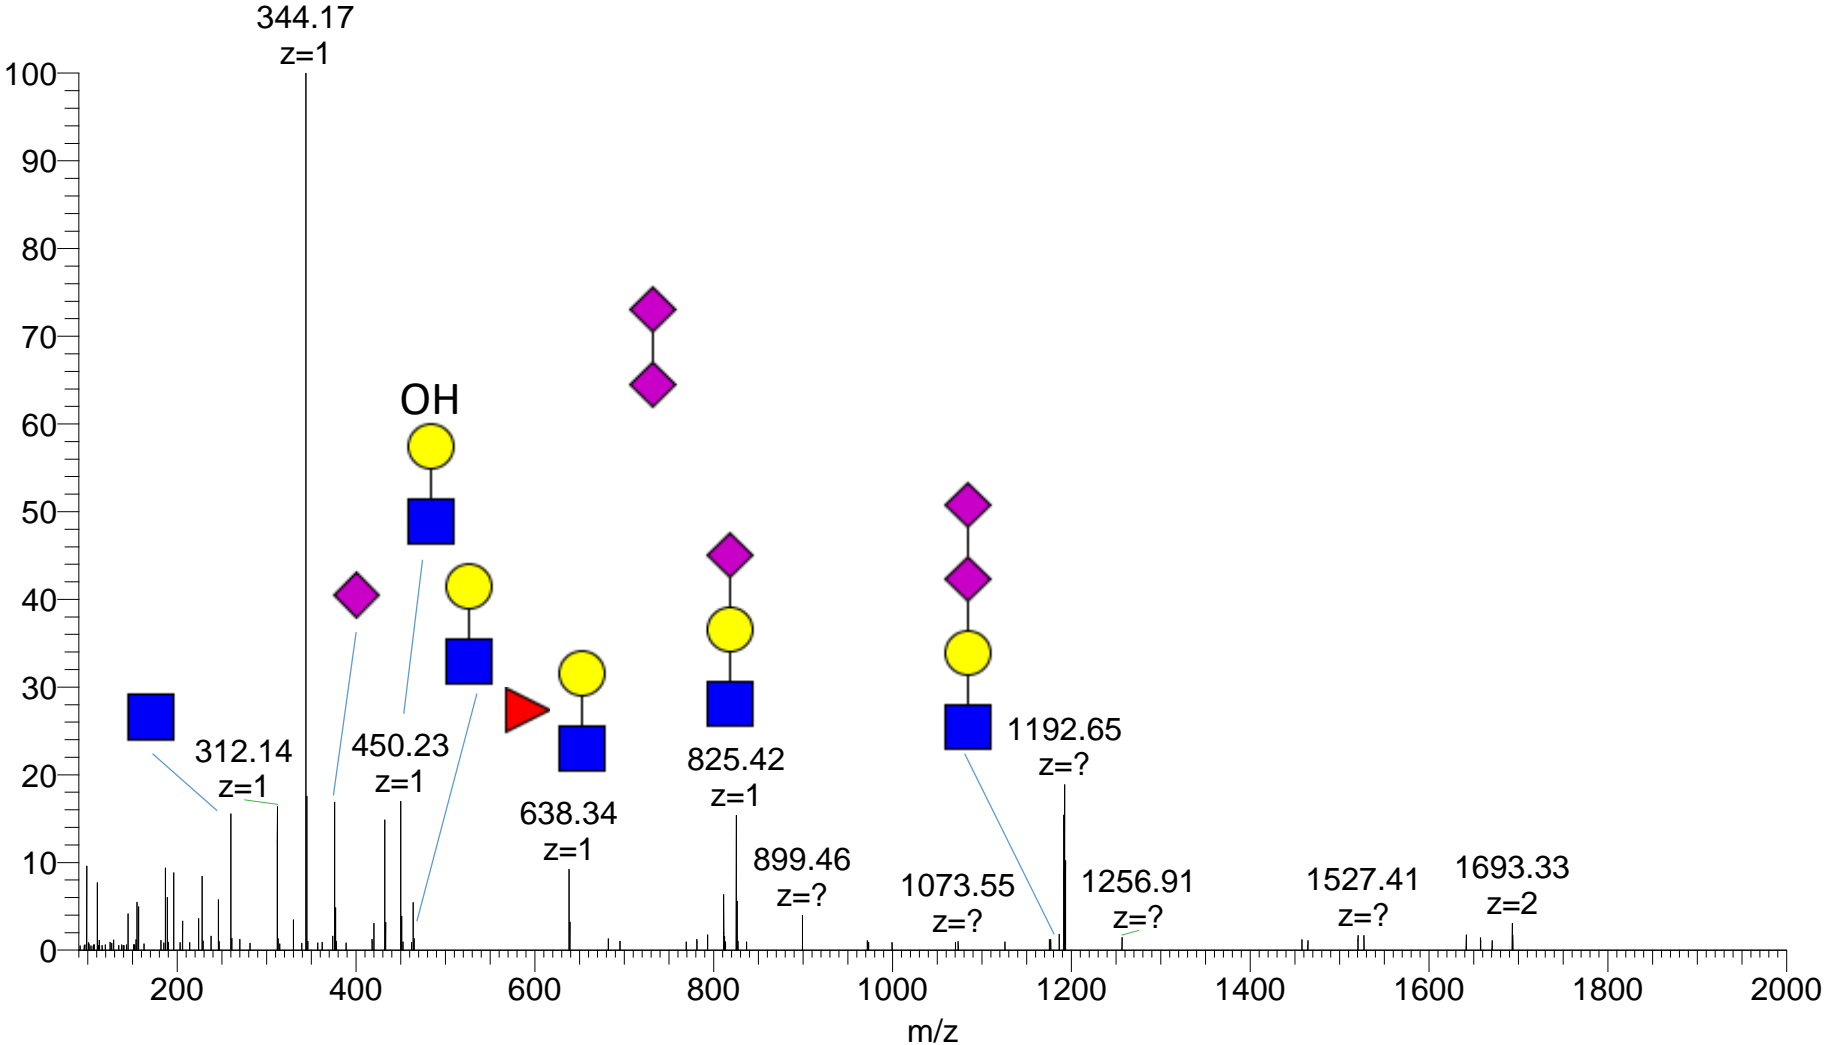

Supplement: supp_TIR117.000156_4753_2_supp_15114_my6dz3.pdf [file supp_TIR117.000156_4753_2_supp_15114_my6dz3.pdf]
