# Supplementary material
Source: PubMed Central journal article supplement (PMC5724186)
Supplement: supp_TIR117.000156_4753_2_supp_15116_py6dz4.pdf [file supp_TIR117.000156_4753_2_supp_15116_py6dz4.pdf]

---

**I. Supplemental Figures S1-S7**

- Figure S1. Characteristic MS<sup>3</sup> spectra and ions generated from permethylated glycan standards carrying the target glycotopes.
- Figure S2. RP C18 nanoLC separation of permethylated LacNAc<sub>1-2</sub>-extended cores 1 and 2 O-glycans with 0-2 Fuc.
- Figure S3. Trap CID-MS<sup>2</sup> and HCD-MS<sup>3</sup> spectra of select permethylated, sulfated O-glycans to demonstrate how individual sulfated O-glycans can be identified.
- Figure S4. Graphic User Interface for GlyPick.
- Figure S5. Summed ion intensities for individual MS<sup>2</sup> and MS<sup>3</sup> diagnostic ions across 10 fold differences in the applied sample amount of permethylated AGS O-glycans.
- Figure S6. An overlapping isotopic cluster for co-eluting N-glycans.
- Figure S7. Collated set of 71 annotated MS<sup>2</sup> spectra from the mouse brain striatum N-glycans containing the pd-MS<sup>3</sup>-validated diagnostic ion of disialyl LacNAc glycotope.
- 

**II. Supplemental Table S1-S4****Table S1. Data and statistics for glycotope identification and relative quantification by MS<sup>2</sup>/MS<sup>3</sup> ion intensities.**

- Table S1.1 Statistics of total MS<sup>1</sup>/MS<sup>2</sup>/MS<sup>3</sup> scans acquired on permethylated AGS O-glycans across 10 fold variations in the injected sample amount
- Table S1.2 Total number of MS<sup>2</sup> spectra in which a particular MS<sup>2</sup> ion could be detected when different amount of permethylated AGS O-glycan samples were applied.
- Table S1.3 The summed intensity for each of the selected MS<sup>2</sup> ions afforded by the permethylated AGS O-glycan samples across 10x variations in the applied sample amount.
- Table S1.4 The summed intensity for the diagnostic MS<sup>3</sup> ions afforded by the target MS<sup>2</sup> oxonium ions of permethylated AGS O-glycan samples across 10x variations in the applied sample amount.

**Table S2. Triplicate reproducibility of glycotope identification and relative quantification by MS<sup>2</sup>/MS<sup>3</sup> ion intensities.**

- Table S2.1 Relative abundance of selected glycotopes on AGS O-glycans based on spectral counting or sum total of its MS<sup>2</sup> ion intensity.
- Table S2.2 Relative abundance of the isomeric constituents of mono- and difucosylated Gal-GlcNAc on AGS O-glycans based on sum of its diagnostic MS<sup>3</sup> ion intensity.
- Table S2.3 Relative abundance of selected glycotopes on AGS N-glycans based on spectral counting or sum total of its MS<sup>2</sup> ion intensity.
- Table S2.4 Relative abundance of the isomeric constituents of mono- and difucosylated Gal-GlcNAc on AGS N-glycans based on sum of its diagnostic MS<sup>3</sup> ion intensity.

**Table S3. NanoLC-MS<sup>2</sup>-pd-MS<sup>3</sup> dataset on permethylated sulfated AGS O-Glycans.****Table S4. NanoLC-MS<sup>2</sup>-pd-MS<sup>3</sup> dataset for the permethylated N-glycans of mouse brain striatum.****Table S5. List of MS<sup>2</sup> scans containing the diagnostic ion at m/z 1186 for the target disialyl LacNAc glycotope, which yielded the diagnostic pd-MS<sup>3</sup> ion at m/z 737.**

---

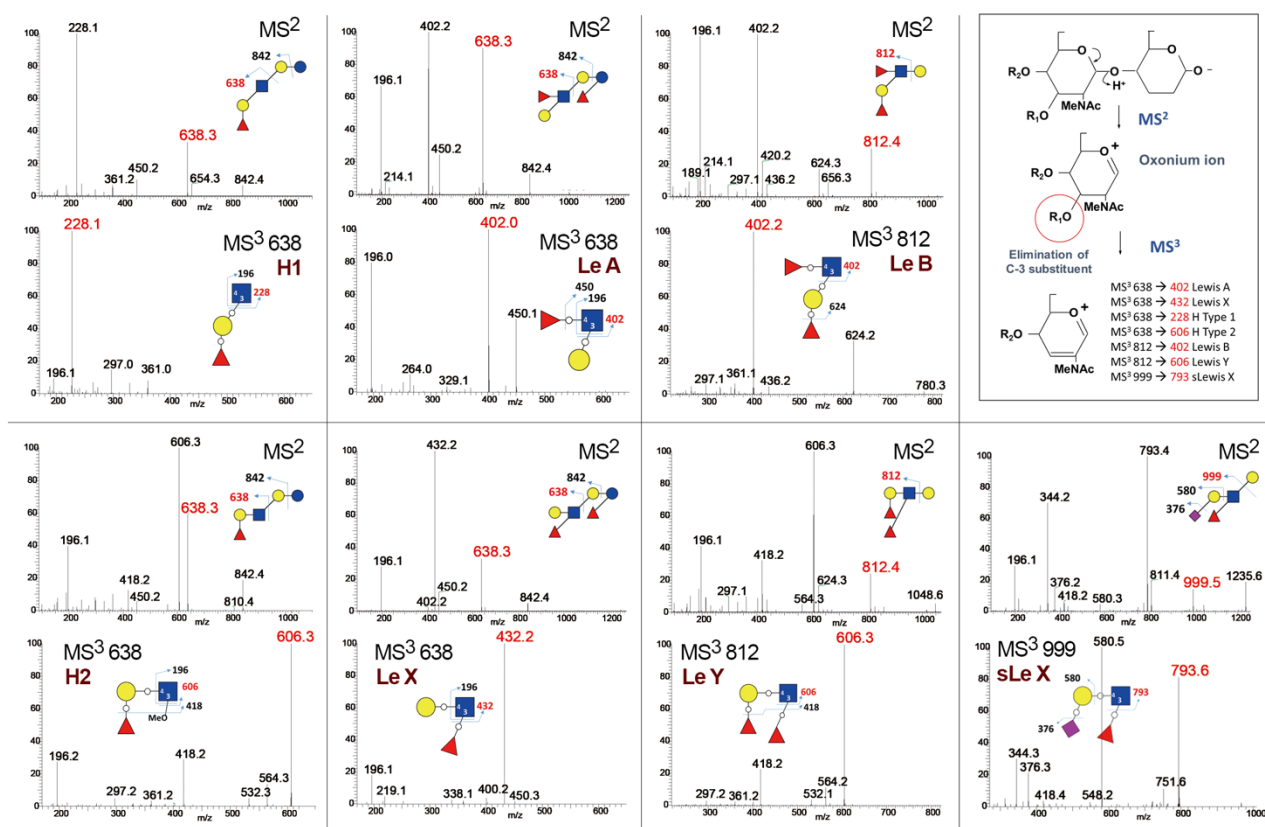

**Figure S1. Characteristic MS<sup>3</sup> spectra and ions generated from protonated permethylated glycan standards carrying the target glycotopes.** Identification of each of the 7 glycotopes *i.e.* H type 1, H type 2, LeA, LeB, LeX, LeY and sialyl LeX (sLeX) is based on detecting the diagnostic MS<sup>3</sup> ion corresponding to the targeted precursor MS<sup>2</sup> oxonium ion having eliminated its substituent on C3-position, as shown schematically in the boxed drawing. This diagnostic MS<sup>3</sup> ion can often also be detected as intense MS<sup>2</sup> ion but in the case when more than a single glycotope is carried on the glycan subjected to MS<sup>2</sup>, its origin cannot be ascertained and hence the need for MS<sup>3</sup>. For each glycotope, the MS<sup>2</sup> spectrum of its precursor and the MS<sup>3</sup> spectrum of its defining oxonium ion are shown in the upper and lower panel, respectively, with the diagnostic MS<sup>2</sup> and MS<sup>3</sup> ions labeled in red color. Apart from these diagnostic MS<sup>2</sup>→MS<sup>3</sup> ion pairs, other more prominent MS<sup>2</sup> and/or MS<sup>3</sup> ions detected include those derived from further loss of an MeOH moiety (-32 u) from HexNAc<sup>+</sup> and NeuAc<sup>+</sup>. Sialylated glycans always yielded the NeuAc<sup>+</sup> oxonium ion at m/z 376, along with m/z 344 after elimination of an MeOH. When the HexNAc is singly substituted at 3-position as in the case of H type 1 glycotope here, only a prominent m/z 228 was produced. When it is doubly substituted, further loss of an MeOH yielded the ion at m/z 196. Loss of Fuc to create a free OH group (-188 u) instead of elimination is commonly observed for Fuc moiety not on C3 position and thus produced the ions at m/z 418, 450 and 624 from the primary ions at m/z 606, 638 and 812, respectively. For the glycan standards that carries a fucosylated HexHexNAc glycotope on a reducing end Gal-GlcNAc, additional cleavage at the Gal produced the B ion at m/z 842, which is much less intense than the dominating oxonium ion at m/z 638. Similar B ion was also detected for NeuAc-Gal<sup>+</sup> at m/z 580. Other minor ions detected were not sequence- nor linkage-informative and not further assigned.

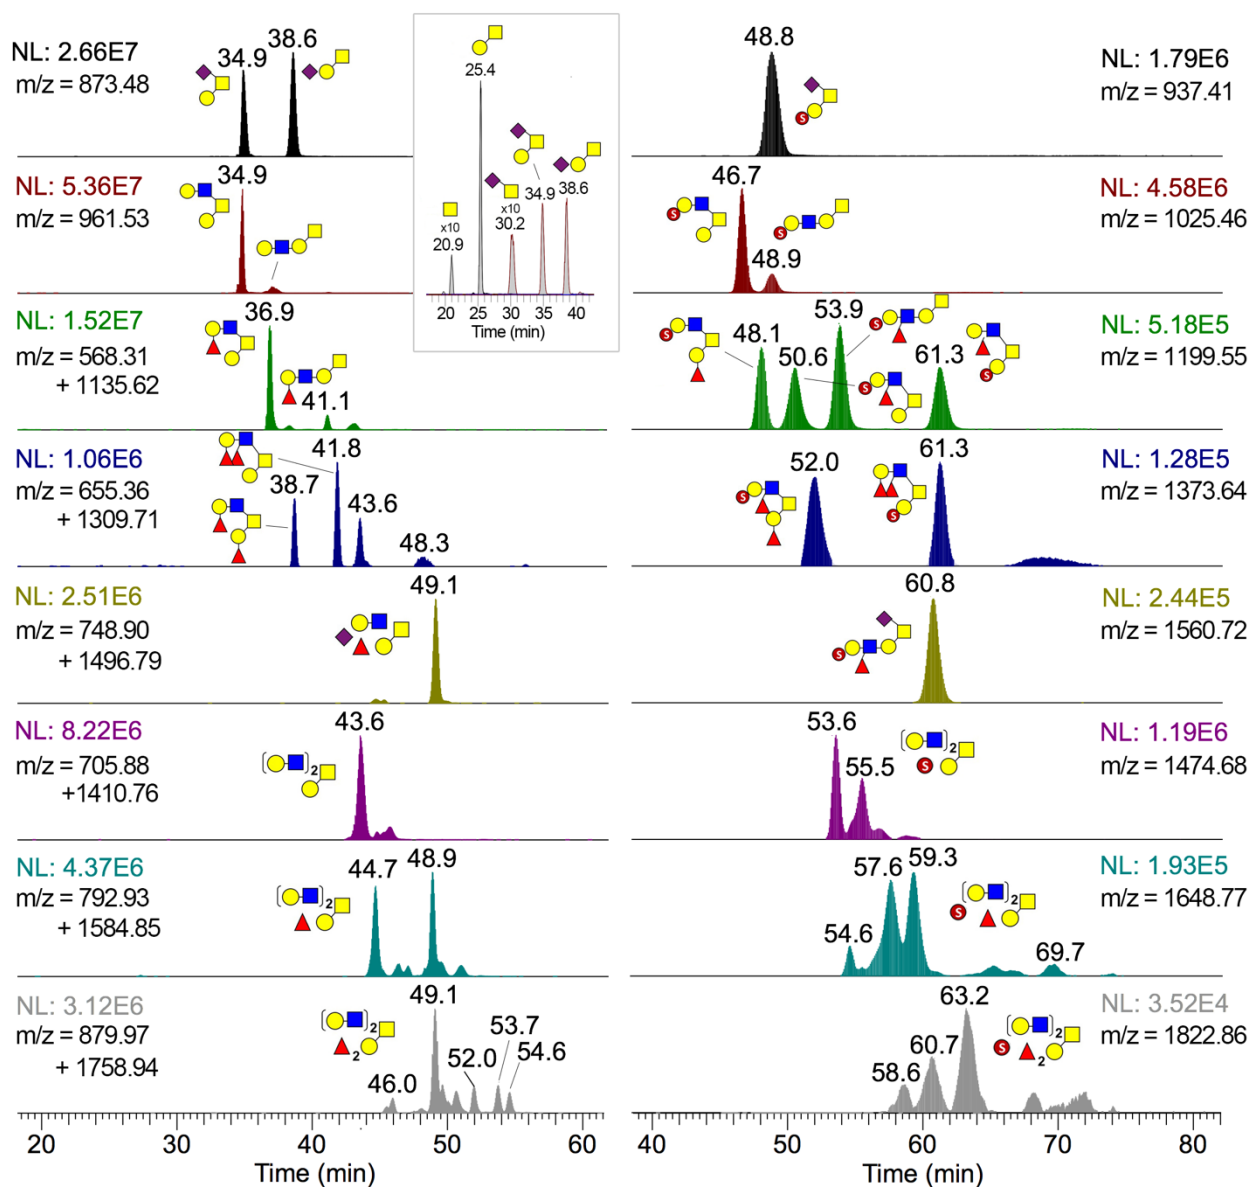

**Figure S2. RP C18 nanoLC separation of permethylated LacNAc<sub>1,2</sub>-extended cores 1 and 2 O-glycans with 0-2 Fuc.** The permethylated non-sulfated (left panel) and mono-sulfated (right panel) AGS O-glycan sets were resolved using the same nanoLC column but with slightly different LC gradients (as described in the Methods section), and detected by MS in positive and negative ion modes, respectively. Larger permethylated, non-sulfated O-glycans were ionized predominantly as singly and doubly protonated in positive ion mode and their XIC intensity is a sum of both species. Permethylated, mono-sulfated O-glycans were detected as singly charged [M-H]<sup>-</sup> species in negative ion mode. The individual peaks for the smaller O-glycans can be resolved into their isomeric constituents based on MS<sup>2</sup>-pd-MS<sup>3</sup> and are individually annotated, whereas larger ones cannot be unambiguously resolved. The Tn (HexNAcitol), sialyl Tn and T (Hex-HexNAcitol) structures can be further resolved from the sialylated core 1 structures, as shown in the inset.

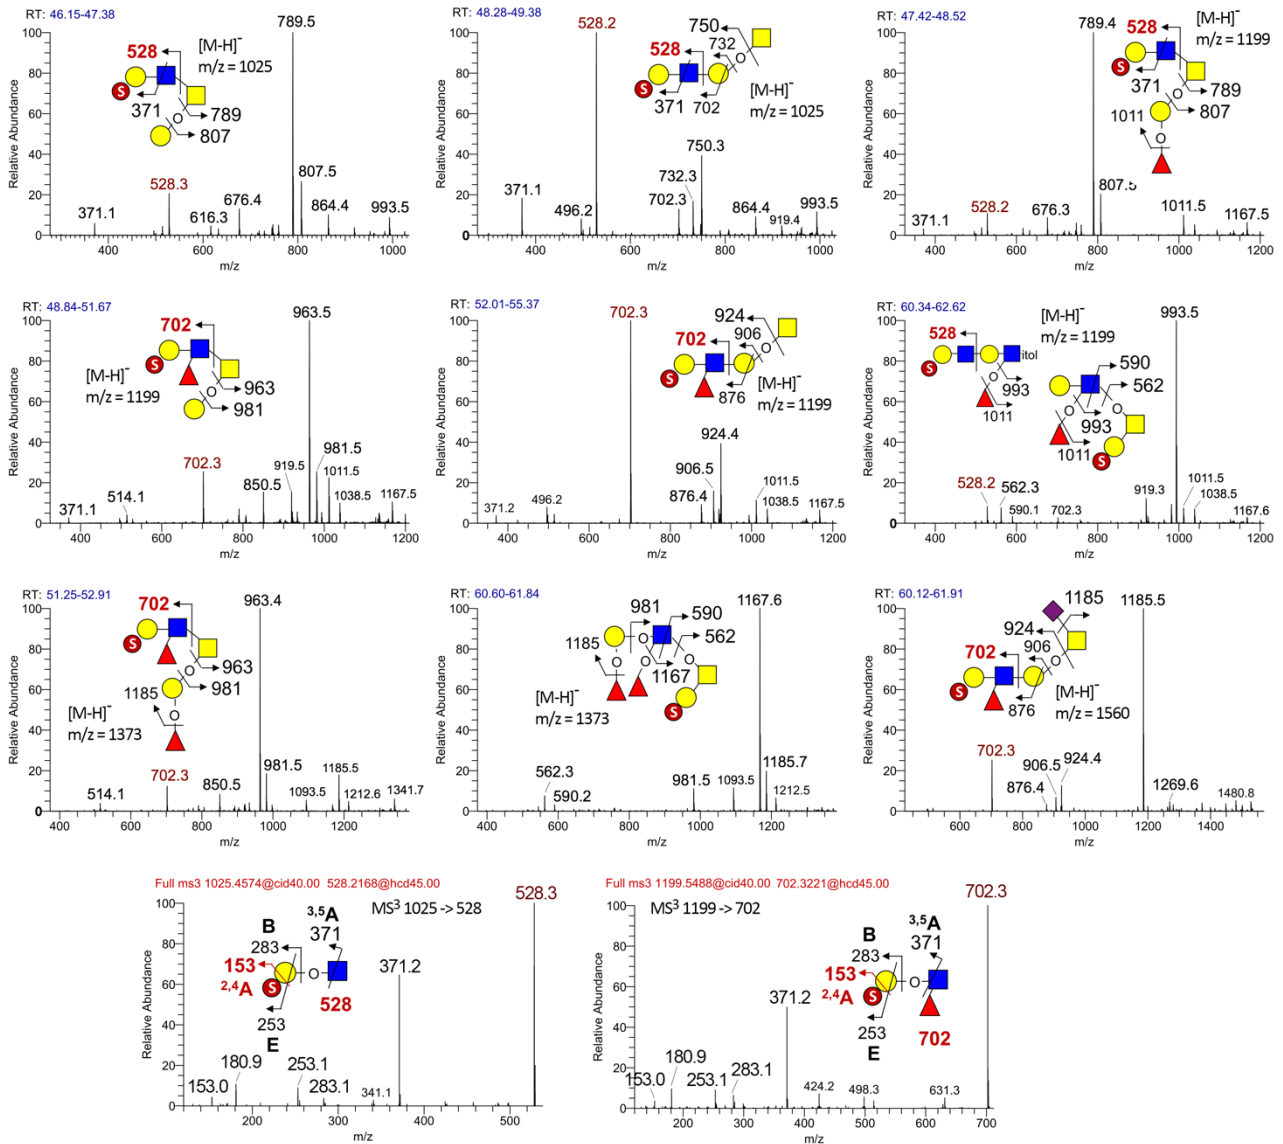

**Figure S3. Trap CID-MS<sup>2</sup> and HCD-MS<sup>3</sup> spectra of select permethylated, sulfated O-glycans to demonstrate how individual sulfated O-glycans can be identified.** The fragmentation pattern was established and reported previously (9) but assignment for the permethylated sulfated AGS O-glycans here is simpler due to 3-O-sulfation at terminal Gal being the predominant form of sulfation. Note that the critical low mass ions informative of the location of sulfate were missing in the trap CID-MS<sup>2</sup> spectra due to the cut-off.

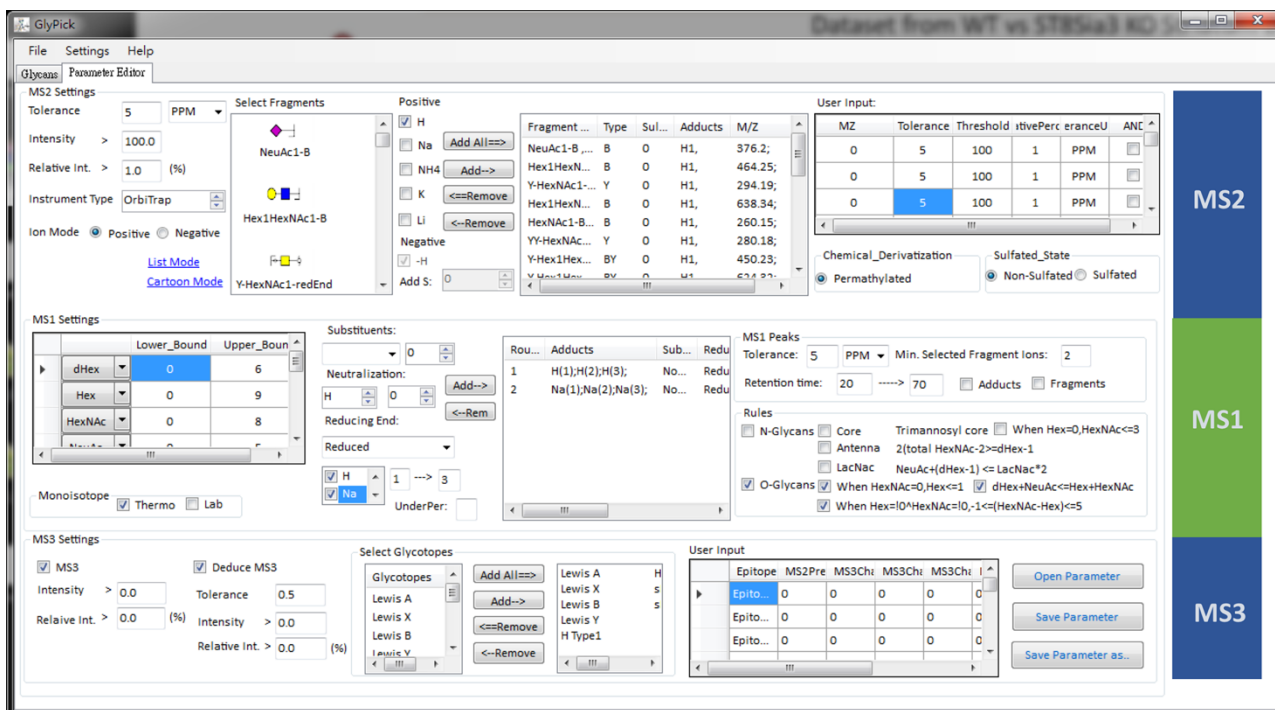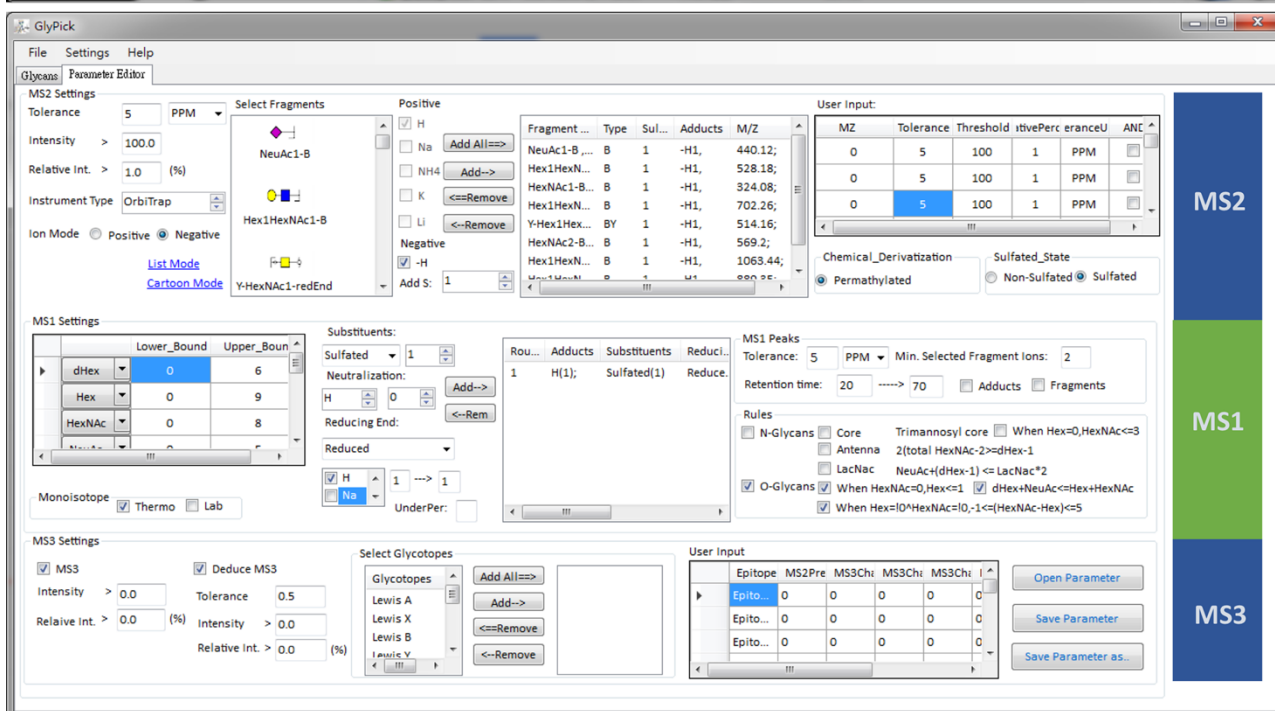

**Figure S4. Graphic User Interface for GlyPick.** The main user input is divided into 3 sections corresponding to MS2, MS1 and MS3 settings, respectively. A minimum user input would require specifying MS2 settings to select for glycan-related MS<sup>2</sup> spectra, with additional MS3 settings if product dependent MS<sup>3</sup> is acquired. Other than built-in MS<sup>2</sup>/MS<sup>3</sup> ions for known glycotopes, additional ions for user defined glycotopes or glycosylation features can be input and included. Input for MS1 settings is required only if fitting glycosyl composition is to be performed. For non-sulfated permethylated glycans in positive ion mode (upper panel), no additional substituent is selected for MS1 setting, whereas considerations for Na<sup>+</sup> adducts (1-3 for mono- to triply charged) or degree of under-permethylation (to be specified), are optional. For sulfated permethylated glycans in negative ion mode (lower panel), the number of sulfate can be specified along with any additional H<sup>+</sup>/Na<sup>+</sup> neutralization of the charge (usually no).

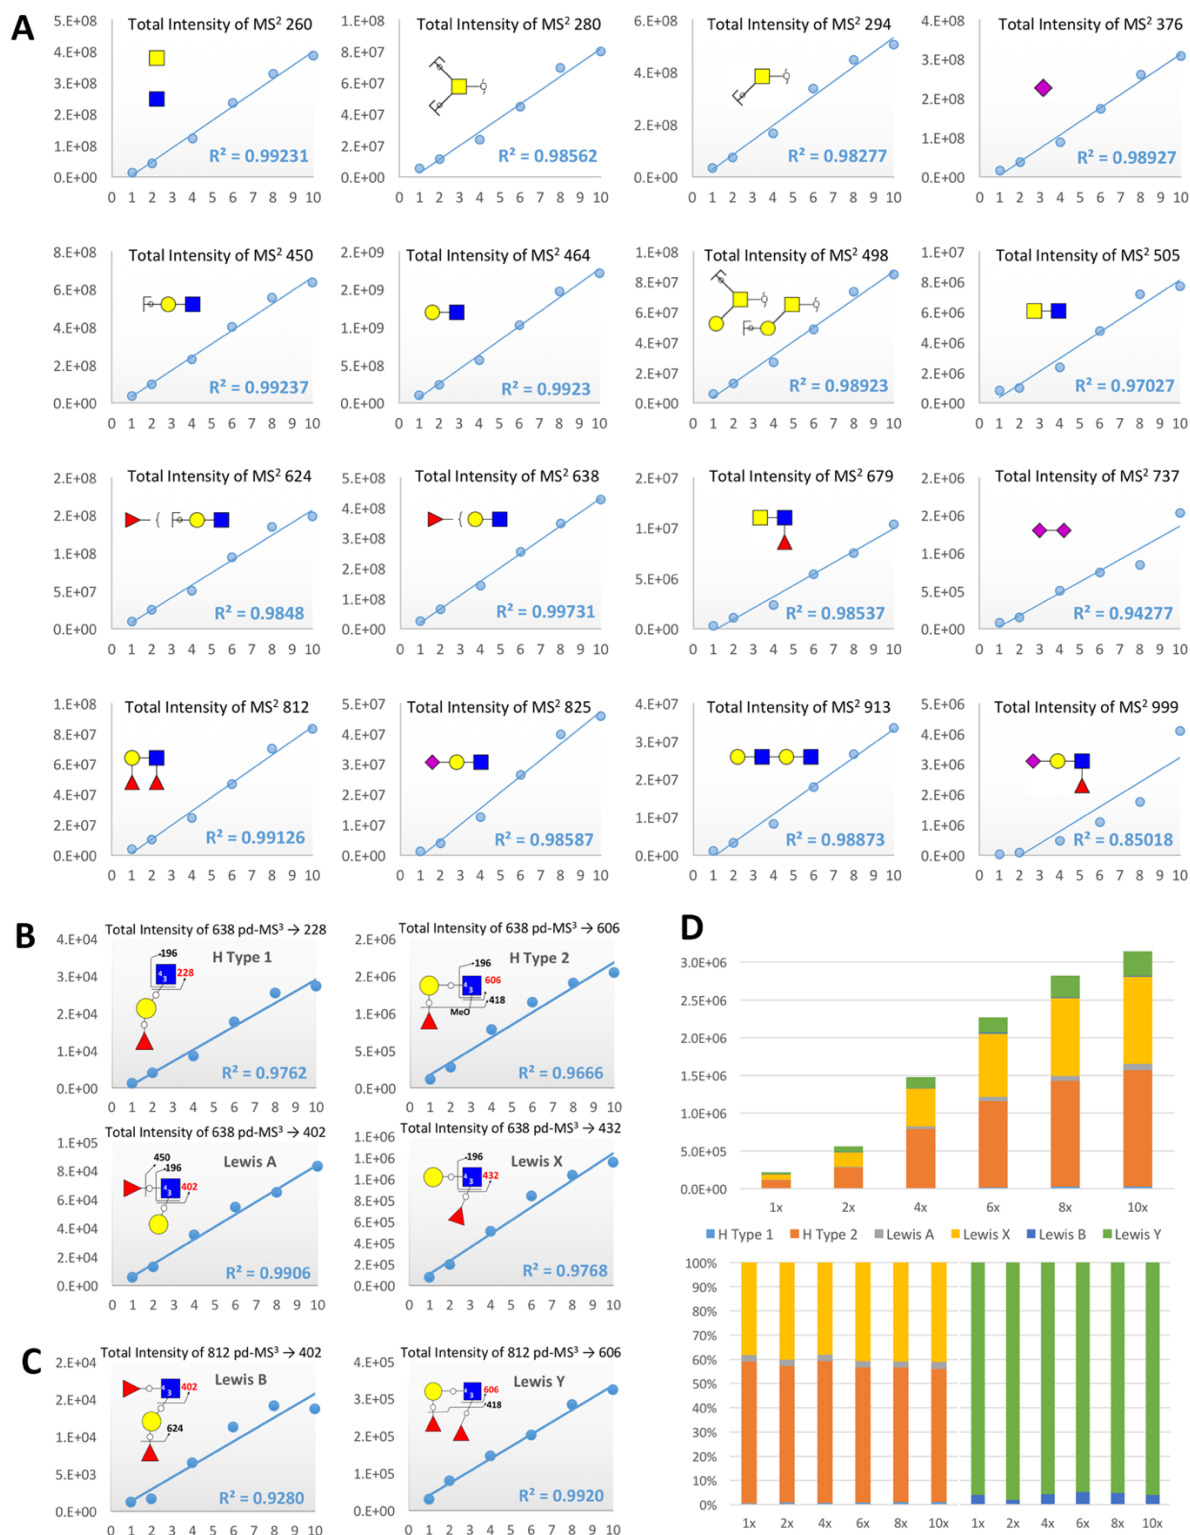

**Figure S5. Summed ion intensities for individual MS<sup>2</sup> and MS<sup>3</sup> diagnostic ions across 10 fold differences in applied sample amount of permethylated AGS O-glycans. (A)** A panel of 16 glycotopes or glycosylation features defined by diagnostic MS<sup>2</sup> ions and sum of their respective total ion intensity in each of the 5 analyses (Table S1.3) representing a 10x concentration range. The 2 panels for *m/z* 638 and 812 are also shown in Fig. 3. Better linearity or R<sup>2</sup> values were obtained when the relative amount of the glycotope in question was higher. In this sample, the diagnostic ions for the disialyl (*m/z* 737) and sialyl Lewis (*m/z* 999) glycotopes were only detected in very few spectra at very low abundance compared to others to allow convincing identification and relative quantification. Summed pd-MS<sup>3</sup> ion intensities for (B) mono- and (C) di-fucosylated Gal-GlcNAc glycotopes (Table S1.4) show equally good linearity over 10x differences in sample amount. (D) The relative abundances of the MS<sup>3</sup>-resolved isomeric constituents for the 2 target glycotopes can be totaled or calculated as % total based on the summed intensities of their respective diagnostic MS<sup>3</sup> ions.

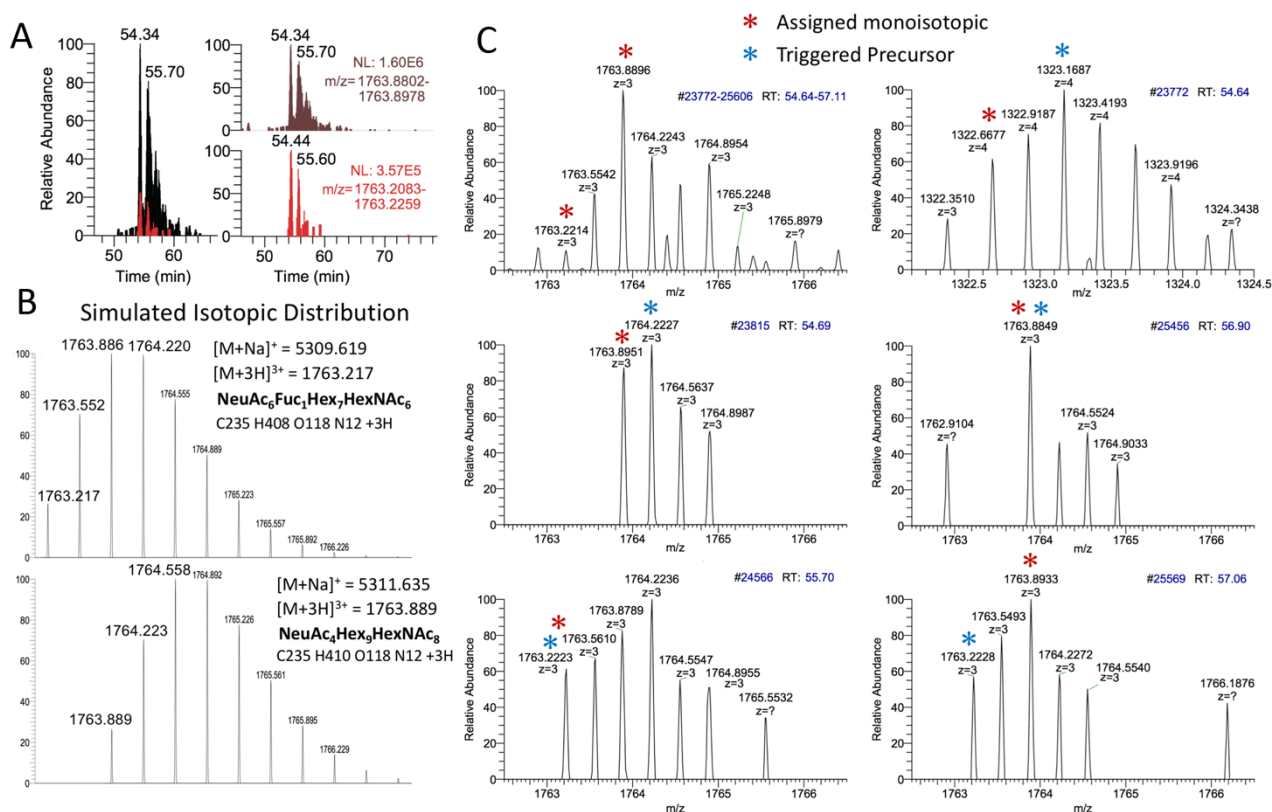

**Figure S6. An overlapping isotopic cluster for co-eluting N-glycans.** In the example shown here, rapid sampling of the MS<sup>1</sup> scans across the elution time period of 54.6 – 57.1 min resulted in MS<sup>2</sup> triggering of different precursors (marked with blue asterisk) based on signal intensity and the dynamic exclusion applied. The raw data processing software would attempt to assign the monoisotopic precursor (marked with red asterisk) for a particular MS<sup>2</sup> scan based on the detected isotopic cluster pattern in the immediate preceding MS<sup>1</sup> scan. Due to poor ion statistics (weak signals), complicated by co-elution of 2 or more different isobaric structures, or even those differed by as much as 2 Da shown in this example, correct assignment of monoisotopic mass is often problematic if not outright impossible. **(A)** Overlapping and non-overlapping XIC plots of the 2 precursors, using the accurate m/z values for the monoisotopic masses at 5 ppm window. **(B)** The simulated isotopic distribution pattern for the 2 structures in question when there is no overlapping interference. **(C)** The detected isotopic clusters for the precursors for each of the individual or averaged MS<sup>1</sup> scans. In practice, irrespective of triggered and assigned precursors, as much as 2 Th for the quadrupole isolation width centered on the triggered precursor was typically applied. In samples of high complexity, multiplexed MS<sup>2</sup> spectra contributed by several precursors is inevitable.

**Figure S7. Collated set of 71 annotated MS<sup>2</sup> spectra from the mouse brain striatum N-glycans containing the pd-MS<sup>3</sup>-validated diagnostic ion of disialyl LacNAc glycotope.** The details for the MS<sup>2</sup> scans including all the identified MS<sup>2</sup> ions, their respective MS<sup>1</sup> scans, the m/z values and intensities of monoisotopic precursors, fitted glycosyl compositions, and their associated pd-MS<sup>3</sup> scans are listed in Table S5.

[Note: This MS<sup>2</sup> spectral set is provided as a separate Supplemental data file in pdf format.]

**Table S1. Data and Statistics for Glycotope Identification and Relative Quantification by MS2/MS3 ion intensities**

**Table S1.1 Statistics of total MS1/MS2/MS3 scans acquired on permethylated AGS O-glycans across 10 fold variations in the injected sample amount.** The actual amount of glycans in each of the 6 runs was not determined but defined by different dilution factors applied on aliquots of C18 Zip-Tip eluates, with the undiluted one designated as 10x. For all subsequent data mining, only MS1 and MS3 scans associated with MS2 spectra acquired within 20-70 min of the nanoLC run and which contain at least 2 predefined diagnostic MS2 ions detected at an accuracy of 5 ppm were considered<sup>1</sup>. The total intensity of all selected MS2 ions<sup>2</sup> is a better indicator of the relative abundance of total glycans than the total MS2 spectral count<sup>3</sup>, and can be used as a basis for normalization (Fig. 3A).

| Sample amount injected on column:              |     | 1x        | 2x        | 4x         | 6x         | 8x         | 10x        |
|------------------------------------------------|-----|-----------|-----------|------------|------------|------------|------------|
| Total Scans                                    | MS1 | 3368      | 3213      | 3209       | 3136       | 2916       | 3107       |
|                                                | MS2 | 42524     | 42222     | 39948      | 38492      | 39062      | 37757      |
|                                                | MS3 | 1023      | 2372      | 5057       | 6959       | 7808       | 8271       |
| Select Only within RT: 20-70 min               | MS1 | 1327      | 1243      | 1210       | 1160       | 1127       | 1110       |
|                                                | MS2 | 26047     | 25485     | 23591      | 22373      | 21725      | 21383      |
|                                                | MS3 | 929       | 2160      | 4502       | 6107       | 7000       | 7455       |
| With ≥ 2 diagnostic MS2 ions                   | MS1 | 1103      | 1143      | 1175       | 1143       | 1121       | 1108       |
|                                                | MS2 | 6313      | 9766      | 11676      | 12923      | 13621      | 13276      |
|                                                | MS3 | 691       | 1888      | 4209       | 5743       | 6590       | 7002       |
| Total MS2 Spectral Count <sup>1</sup>          |     | 6313      | 9766      | 11676      | 12923      | 13621      | 13276      |
| Total selected MS2 Spectral Count <sup>3</sup> |     | 11620     | 26641     | 51166      | 71343      | 82874      | 88428      |
| Total selected MS2 Ion intensity <sup>2</sup>  |     | 253821504 | 628733878 | 1466423291 | 2724173528 | 3846120070 | 4476947894 |

**Table S1.2 Total number of MS2 spectra in which a particular MS2 ion could be detected when different amount of permethylated AGS O-glycan samples were applied.** Any MS2 spectrum can contain more than one of the selected ions and hence counted as many times as needed.

| MS2 ion | Total Spectral Count |       |       |       |       |       |
|---------|----------------------|-------|-------|-------|-------|-------|
|         | 1x                   | 2x    | 4x    | 6x    | 8x    | 10x   |
| 260     | 1800                 | 5227  | 10083 | 13191 | 14919 | 15171 |
| 280     | 278                  | 515   | 1037  | 1799  | 2176  | 2554  |
| 294     | 759                  | 1456  | 2852  | 4406  | 5209  | 5699  |
| 376     | 758                  | 1710  | 4097  | 6465  | 7987  | 9256  |
| 450     | 1532                 | 4202  | 8474  | 11501 | 13021 | 13232 |
| 464     | 4398                 | 8001  | 11997 | 14785 | 16363 | 16758 |
| 498     | 227                  | 472   | 813   | 1321  | 1552  | 1803  |
| 505     | 73                   | 57    | 130   | 242   | 384   | 436   |
| 624     | 213                  | 576   | 1319  | 2389  | 3153  | 3750  |
| 638     | 1125                 | 3231  | 7433  | 9886  | 11211 | 11736 |
| 679     | 37                   | 130   | 204   | 488   | 417   | 600   |
| 737     | 6                    | 12    | 15    | 22    | 30    | 42    |
| 812     | 188                  | 488   | 1117  | 1874  | 2586  | 3052  |
| 825     | 123                  | 330   | 1058  | 1994  | 2534  | 2736  |
| 913     | 94                   | 213   | 466   | 854   | 1135  | 1345  |
| 999     | 9                    | 21    | 71    | 126   | 197   | 258   |
| Total:  | 11620                | 26641 | 51166 | 71343 | 82874 | 88428 |

**Table S1.3 The summed intensity for each of the selected MS2 ions afforded by the permethylated AGS O-glycan samples across 10x variations in the applied sample amount.** The total intensity of all selected MS2 ions<sup>1</sup> is a good indication of the relative abundance of total glycans, which can be used as a basis for normalization. Alternatively, the summed intensity of each of the MS2 ions can be expressed as % of total intensity<sup>2</sup> for all selected MS2 ions (Fig. S5A, 3C & 3D)

| MS2 ion              | Summed Ion Intensity |           |            |            |            |            | % of Total Ion Intensity <sup>2</sup> |        |        |        |        |        |        |       |
|----------------------|----------------------|-----------|------------|------------|------------|------------|---------------------------------------|--------|--------|--------|--------|--------|--------|-------|
|                      | 1x                   | 2x        | 4x         | 6x         | 8x         | 10x        | 1x                                    | 2x     | 4x     | 6x     | 8x     | 10x    | Avg.   | SD.   |
| 260                  | 13458205             | 42855934  | 122116582  | 235656085  | 328974184  | 386633703  | 5.30%                                 | 6.82%  | 8.33%  | 8.65%  | 8.55%  | 8.64%  | 7.71%  | 1.25% |
| 280                  | 5315276              | 11368502  | 23797315   | 44783863   | 69382278   | 79805074   | 2.09%                                 | 1.81%  | 1.62%  | 1.64%  | 1.80%  | 1.78%  | 1.79%  | 0.15% |
| 294                  | 34042513             | 74909009  | 166949294  | 338278432  | 446960392  | 504569091  | 13.41%                                | 11.91% | 11.38% | 12.42% | 11.62% | 11.27% | 12.00% | 0.73% |
| 376                  | 15760184             | 37175664  | 88807671   | 173321485  | 260929425  | 308018023  | 6.21%                                 | 5.91%  | 6.06%  | 6.36%  | 6.78%  | 6.88%  | 6.37%  | 0.36% |
| 450                  | 35268060             | 97872503  | 230920548  | 401731591  | 554797842  | 635465840  | 13.89%                                | 15.57% | 15.75% | 14.75% | 14.42% | 14.19% | 14.76% | 0.68% |
| 464                  | 102063264            | 241588488 | 562431014  | 1029793135 | 1475004624 | 1715871867 | 40.21%                                | 38.42% | 38.35% | 37.80% | 38.35% | 38.33% | 38.58% | 0.76% |
| 498                  | 5822824              | 13006723  | 26900037   | 48522062   | 73460642   | 84876809   | 2.29%                                 | 2.07%  | 1.83%  | 1.78%  | 1.91%  | 1.90%  | 1.96%  | 0.17% |
| 505                  | 803025               | 967282    | 2352575    | 4735727    | 7168249    | 7711839    | 0.32%                                 | 0.15%  | 0.16%  | 0.17%  | 0.19%  | 0.17%  | 0.19%  | 0.06% |
| 624                  | 9696741              | 25318926  | 50266317   | 94693581   | 134508694  | 148729281  | 3.82%                                 | 4.03%  | 3.43%  | 3.48%  | 3.50%  | 3.32%  | 3.60%  | 0.25% |
| 638                  | 25022203             | 65194248  | 143246913  | 254411932  | 348318467  | 426730323  | 9.86%                                 | 10.37% | 9.77%  | 9.34%  | 9.06%  | 9.53%  | 9.65%  | 0.42% |
| 679                  | 287068               | 1116973   | 2362511    | 5400149    | 7508810    | 10346322   | 0.11%                                 | 0.18%  | 0.16%  | 0.20%  | 0.20%  | 0.23%  | 0.18%  | 0.04% |
| 737                  | 79530                | 154160    | 505860     | 744542     | 845351     | 1527353    | 0.03%                                 | 0.02%  | 0.03%  | 0.03%  | 0.02%  | 0.03%  | 0.03%  | 0.00% |
| 812                  | 3872599              | 10206323  | 24530117   | 46756232   | 70120271   | 83282468   | 1.53%                                 | 1.62%  | 1.67%  | 1.72%  | 1.82%  | 1.86%  | 1.70%  | 0.11% |
| 825                  | 1210136              | 3765762   | 12541246   | 26401086   | 39839942   | 45765000   | 0.48%                                 | 0.60%  | 0.86%  | 0.97%  | 1.04%  | 1.02%  | 0.83%  | 0.22% |
| 913                  | 1096080              | 3151609   | 8232875    | 17858040   | 26548020   | 33522929   | 0.43%                                 | 0.50%  | 0.56%  | 0.66%  | 0.69%  | 0.75%  | 0.60%  | 0.11% |
| 999                  | 23796                | 81772     | 462416     | 1085586    | 1752879    | 4091972    | 0.01%                                 | 0.01%  | 0.03%  | 0.04%  | 0.05%  | 0.09%  | 0.04%  | 0.03% |
| Total <sup>1</sup> : | 253821504            | 628733878 | 1466423291 | 2724173528 | 3846120070 | 4476947894 |                                       |        |        |        |        |        |        |       |

| MS2 <sup>2</sup> | MS3 <sup>3</sup> | Glycotope <sup>1</sup> | Summed Ion Intensity <sup>4</sup> |        |         |         |         |         |
|------------------|------------------|------------------------|-----------------------------------|--------|---------|---------|---------|---------|
|                  |                  |                        | 1x                                | 2x     | 4x      | 6x      | 8x      | 10x     |
| 638              | 228              | H Type 1               | 1142                              | 3882   | 8447    | 17583   | 25343   | 27169   |
| 638              | 606              | H Type 2               | 110997                            | 272340 | 777605  | 1143989 | 1401769 | 1543694 |
| 638              | 402              | Lewis A                | 5231                              | 12476  | 35012   | 54329   | 64792   | 82904   |
| 638              | 432              | Lewis X                | 72658                             | 193758 | 506451  | 837734  | 1031916 | 1152137 |
| 812              | 402              | Lewis B                | 1208                              | 1610   | 6440    | 11268   | 14086   | 13682   |
| 812              | 606              | Lewis Y                | 29119                             | 78254  | 144982  | 201400  | 283288  | 323321  |
| Total:           |                  |                        | 220354                            | 562320 | 1478937 | 2266302 | 2821194 | 3142906 |

**Table S1.4 The summed intensity for the diagnostic MS3 ions afforded by the target MS2 oxonium ions of permethylated AGS O-glycan samples across 10x variations in the applied sample amount.** The isomeric mono- and difucosylated glycotopes<sup>1</sup> sharing the same MS2 oxonium ion<sup>2</sup> were identified by their diagnostic MS3 ion<sup>3</sup> and quantified by sum of their respective ion intensity<sup>4</sup> in each of the product dependent-MS3 spectra where it was detected. See Fig. S5B-D for the corresponding charts.



**Table S2. Triplicate Reproducibility of Glycotope Identification and Relative Quantification by MS2/MS3 ion intensities**

**Table S2.1 Relative abundance of selected glycotopes on AGS O-glycans based on spectral counting or sum total of its MS2 ion intensity.** Relative quantification can be based on counting the number of MS2 spectra in which the target ion<sup>1</sup> was detected (spectral counting<sup>2</sup>), sum of its ion intensity<sup>3</sup> in each of these MS2 spectra, and/or expressed as % of total intensity<sup>4</sup> of all selected ions, or normalised against an arbitrarily chosen reference glycotope<sup>5</sup> (here LacNAc, represented by m/z 464). Reproducibility of quantified relative abundance of individual and all glycotopes was evaluated by triplicate analyses.

| MS2 Ion <sup>1</sup> | Total Spectral Count <sup>2</sup> |       |       | Summed Ion Intensity <sup>3</sup> |            |            | % of Total Ion Intensity <sup>4</sup> |       |       |      |       | Total Ion Intensity /464 <sup>5</sup> |        |        |
|----------------------|-----------------------------------|-------|-------|-----------------------------------|------------|------------|---------------------------------------|-------|-------|------|-------|---------------------------------------|--------|--------|
|                      | Run 1                             | Run 2 | Run 3 | Run 1                             | Run 2      | Run 3      | Run 1                                 | Run 2 | Run 3 | Avg. | SD    | Run 1                                 | Run 2  | Run 3  |
| 260                  | 10083                             | 10241 | 10390 | 122116582                         | 124578563  | 135497368  | 8.3%                                  | 8.0%  | 8.5%  | 8%   | 0.21% | 21.7%                                 | 21.4%  | 22.9%  |
| 280                  | 1037                              | 1080  | 1106  | 23797315                          | 25900976   | 26838516   | 1.6%                                  | 1.7%  | 1.7%  | 2%   | 0.03% | 4.2%                                  | 4.4%   | 4.5%   |
| 294                  | 2852                              | 2875  | 3098  | 166949294                         | 177401591  | 196612456  | 11.4%                                 | 11.5% | 12.3% | 12%  | 0.50% | 29.7%                                 | 30.5%  | 33.2%  |
| 376                  | 4097                              | 4183  | 4337  | 88807671                          | 96122218   | 104236343  | 6.1%                                  | 6.2%  | 6.5%  | 6%   | 0.23% | 15.8%                                 | 16.5%  | 17.6%  |
| 450                  | 8474                              | 8477  | 8781  | 230920548                         | 240386261  | 241043411  | 15.8%                                 | 15.5% | 15.1% | 15%  | 0.35% | 41.1%                                 | 41.3%  | 40.7%  |
| 464                  | 11997                             | 12287 | 12382 | 562431014                         | 582212238  | 592971901  | 38.4%                                 | 37.6% | 37.1% | 38%  | 0.66% | 100.0%                                | 100.0% | 100.0% |
| 498                  | 813                               | 831   | 875   | 26900037                          | 29368870   | 29862395   | 1.8%                                  | 1.9%  | 1.9%  | 2%   | 0.03% | 4.8%                                  | 5.0%   | 5.0%   |
| 505                  | 130                               | 150   | 134   | 2352575                           | 2784667    | 2563217    | 0.2%                                  | 0.2%  | 0.2%  | 0%   | 0.01% | 0.4%                                  | 0.5%   | 0.4%   |
| 624                  | 1319                              | 1285  | 1413  | 50266317                          | 59670006   | 57545820   | 3.4%                                  | 3.9%  | 3.6%  | 4%   | 0.21% | 8.9%                                  | 10.2%  | 9.7%   |
| 638                  | 7433                              | 7337  | 7577  | 143246913                         | 156660396  | 157931384  | 9.8%                                  | 10.1% | 9.9%  | 10%  | 0.18% | 25.5%                                 | 26.9%  | 26.6%  |
| 679                  | 204                               | 221   | 258   | 2362511                           | 2823710    | 3142534    | 0.2%                                  | 0.2%  | 0.2%  | 0%   | 0.02% | 0.4%                                  | 0.5%   | 0.5%   |
| 812                  | 1117                              | 1078  | 1148  | 24530117                          | 27181769   | 28848342   | 1.7%                                  | 1.8%  | 1.8%  | 2%   | 0.07% | 4.4%                                  | 4.7%   | 4.9%   |
| 825                  | 1058                              | 1039  | 1058  | 12541246                          | 13001088   | 13032857   | 0.9%                                  | 0.8%  | 0.8%  | 1%   | 0.02% | 2.2%                                  | 2.2%   | 2.2%   |
| 913                  | 466                               | 427   | 491   | 8232875                           | 9377115    | 9674183    | 0.6%                                  | 0.6%  | 0.6%  | 1%   | 0.03% | 1.5%                                  | 1.6%   | 1.6%   |
| 999                  | 71                                | 70    | 82    | 462416                            | 410790     | 574997     | 0.0%                                  | 0.0%  | 0.0%  | 0%   | 0.00% | 0.1%                                  | 0.1%   | 0.1%   |
| Total:               | 32893                             | 33425 | 34102 | 1465917431                        | 1547880258 | 1600375724 | 100%                                  | 100%  | 100%  | 100% |       |                                       |        |        |

| MS2 <sup>2</sup> | MS3 <sup>3</sup> | Glycotope <sup>1</sup> | Summed Ion Intensity <sup>4</sup> |         |         |         |       |
|------------------|------------------|------------------------|-----------------------------------|---------|---------|---------|-------|
|                  |                  |                        | Run 1                             | Run 2   | Run 3   | Avg.    | SD.   |
| 638              | 228              | H Type 1               | 8447                              | 8676    | 11874   | 9665    | 1916  |
| 638              | 606              | H Type 2               | 777605                            | 727267  | 766689  | 757187  | 26480 |
| 638              | 402              | Lewis A                | 35012                             | 34610   | 32197   | 33939   | 1523  |
| 638              | 432              | Lewis X                | 506451                            | 509044  | 535423  | 516973  | 16031 |
| 812              | 402              | Lewis B                | 6440                              | 4024    | 8452    | 6305    | 2217  |
| 812              | 606              | Lewis Y                | 144982                            | 147406  | 143771  | 145386  | 1851  |
| Total:           |                  |                        | 1478937                           | 1431027 | 1498405 | 1469456 |       |

**Table S2.2 Relative abundance of the isomeric constituents of mono- and difucosylated Gal-GlcNAc on AGS O-glycans based on sum of its diagnostic MS3 ion intensity.** The isomeric glycotope<sup>1</sup> sharing the same MS2 oxonium ion<sup>2</sup> is identified by its diagnostic MS3 ion<sup>3</sup> and quantified by sum of its ion intensity<sup>4</sup> in each of the product dependent-MS3 spectra where it was detected. Reproducibility of quantified relative abundance was evaluated by triplicate analyses.

**Table S2.3 Relative abundance of selected glycotopes on AGS N-glycans based on spectral counting or sum total of its MS2 ion intensity.** Relative quantification can be based on counting the number of MS2 spectra in which the target ion<sup>1</sup> was detected (spectral counting<sup>2</sup>), sum of its ion intensity<sup>3</sup> in each of these MS2 spectra, and/or expressed as % of total intensity<sup>4</sup> of all selected ions, or normalised against an arbitrarily chosen reference glycotope<sup>5</sup> (here LacNAc, represented by m/z 464). Reproducibility of quantified relative abundance of individual and all glycotopes was evaluated by triplicate analyses.

| MS2 Ion <sup>1</sup> | Total Spectral Count <sup>2</sup> |        |        | Summed Ion Intensity <sup>3</sup> |             |             | % of Total Ion Intensity <sup>4</sup> |       |       |      |       | Total Ion Intensity /464 <sup>5</sup> |        |        |
|----------------------|-----------------------------------|--------|--------|-----------------------------------|-------------|-------------|---------------------------------------|-------|-------|------|-------|---------------------------------------|--------|--------|
|                      | Run 1                             | Run 2  | Run 3  | Run 1                             | Run 2       | Run 3       | Run 1                                 | Run 2 | Run 3 | Avg. | SD    | Run 1                                 | Run 2  | Run 3  |
| 260                  | 15623                             | 15390  | 15002  | 3373143903                        | 3333405021  | 3362923822  | 20.2%                                 | 20.4% | 20.4% | 20%  | 0.11% | 76.7%                                 | 77.3%  | 76.9%  |
| 280                  | 9055                              | 8817   | 8553   | 665232946                         | 636408864   | 641687763   | 4.0%                                  | 3.9%  | 3.9%  | 4%   | 0.05% | 15.1%                                 | 14.8%  | 14.7%  |
| 294                  | 9645                              | 9486   | 9171   | 4523786318                        | 4502356955  | 4463534745  | 27.1%                                 | 27.5% | 27.1% | 27%  | 0.22% | 102.8%                                | 104.4% | 102.1% |
| 376                  | 7424                              | 7294   | 7135   | 572286482                         | 551733979   | 574328076   | 3.4%                                  | 3.4%  | 3.5%  | 3%   | 0.06% | 13.0%                                 | 12.8%  | 13.1%  |
| 450                  | 17774                             | 17698  | 17581  | 1703895791                        | 1657354031  | 1664968674  | 10.2%                                 | 10.1% | 10.1% | 10%  | 0.05% | 38.7%                                 | 38.4%  | 38.1%  |
| 464                  | 18259                             | 18233  | 18162  | 4399691875                        | 4312472784  | 4371611290  | 26.4%                                 | 26.3% | 26.6% | 26%  | 0.12% | 100.0%                                | 100.0% | 100.0% |
| 505                  | 613                               | 592    | 556    | 16499887                          | 16212208    | 14885554    | 0.1%                                  | 0.1%  | 0.1%  | 0%   | 0.00% | 0.4%                                  | 0.4%   | 0.3%   |
| 624                  | 14                                | 14     | 7      | 45377                             | 46147       | 26905       | 0.0%                                  | 0.0%  | 0.0%  | 0%   | 0.00% | 0.0%                                  | 0.0%   | 0.0%   |
| 638                  | 16652                             | 16668  | 16597  | 1113034896                        | 1065713088  | 1072172198  | 6.7%                                  | 6.5%  | 6.5%  | 7%   | 0.09% | 25.3%                                 | 24.7%  | 24.5%  |
| 679                  | 1208                              | 1180   | 1154   | 41971650                          | 40172677    | 39774548    | 0.3%                                  | 0.2%  | 0.2%  | 0%   | 0.00% | 1.0%                                  | 0.9%   | 0.9%   |
| 812                  | 6737                              | 6481   | 6561   | 138161694                         | 128843594   | 127249330   | 0.8%                                  | 0.8%  | 0.8%  | 1%   | 0.03% | 3.1%                                  | 3.0%   | 2.9%   |
| 825                  | 1090                              | 1053   | 865    | 20373727                          | 11896181    | 6568405     | 0.1%                                  | 0.1%  | 0.0%  | 0%   | 0.04% | 0.5%                                  | 0.3%   | 0.2%   |
| 913                  | 4625                              | 4668   | 4720   | 115579543                         | 114793209   | 115564059   | 0.7%                                  | 0.7%  | 0.7%  | 1%   | 0.01% | 2.6%                                  | 2.7%   | 2.6%   |
| 999                  | 292                               | 258    | 290    | 2899975                           | 2651411     | 2736851     | 0.0%                                  | 0.0%  | 0.0%  | 0%   | 0.00% | 0.1%                                  | 0.1%   | 0.1%   |
| Total:               | 109011                            | 107832 | 106354 | 16686604064                       | 16374060149 | 16458032220 | 100%                                  | 100%  | 100%  | 100% |       |                                       |        |        |

| MS2 <sup>2</sup> | MS3 <sup>3</sup> | Glycotope <sup>1</sup> | Summed Ion Intensity <sup>4</sup> |         |         |         |       |
|------------------|------------------|------------------------|-----------------------------------|---------|---------|---------|-------|
|                  |                  |                        | Run 1                             | Run 2   | Run 3   | Avg.    | Std.  |
| 638              | 228              | H Type 1               | 15514                             | 19392   | 11874   | 15593   | 3760  |
| 638              | 606              | H Type 2               | 3434013                           | 3481288 | 3450960 | 3455420 | 23951 |
| 638              | 402              | Lewis A                | 211596                            | 191883  | 203953  | 202477  | 9939  |
| 638              | 432              | Lewis X                | 2307996                           | 2309714 | 2291537 | 2303082 | 10035 |
| 812              | 402              | Lewis B                | 38619                             | 25744   | 34192   | 32852   | 6541  |
| 812              | 606              | Lewis Y                | 1036361                           | 990269  | 982985  | 1003205 | 28944 |
| Total:           |                  |                        | 7044099                           | 7018290 | 6975500 | 7012630 |       |

**Table S2.4 Relative abundance of the isomeric constituents of mono- and difucosylated Gal-GlcNAc on AGS N-glycans based on sum of its diagnostic MS3 ion intensity.** The isomeric glycotope<sup>1</sup> sharing the same MS2 oxonium ion<sup>2</sup> is identified by its diagnostic MS3 ion<sup>3</sup> and quantified by sum of its ion intensity<sup>4</sup> in each of the product dependent-MS3 spectra where it was detected. Reproducibility of quantified relative abundance was evaluated by triplicate analyses.

**Table S3. NanoLC-MS2/MS3 Dataset on permethylated sulfated AGS O-Glycans.** The data were acquired in negative ion mode by nanoLC-HCD MS2-pd-HCD MS3 targeting the MS2 product ions at m/z 528 and 702. The filtered and edited entries were sorted according to the m/z of singly charged [M-H]<sup>-</sup> and then by elution time (MS1 scan number).

| MS1 Scan | RT    | m/z (Mono) | MS1 Intensity | Fitted Glycosyl Composition | MS2 Scan | MS2 Selected Ions                             | MS3 Scan | pd-MS3 | MS3 ions                                |
|----------|-------|------------|---------------|-----------------------------|----------|-----------------------------------------------|----------|--------|-----------------------------------------|
| 3367     | 21.16 | 821.4      | 75387.3       | H1N2S1                      | 3369     | 153;181;283;371.1;528.2                       |          |        |                                         |
| 3390     | 21.34 | 821.4      | 199621.2      | H1N2S1                      | 3392     | 153;181;253;283;371.1;528.2                   |          |        |                                         |
| 3416     | 21.51 | 821.4      | 232585.5      | H1N2S1                      | 3418     | 153;181;253;283;301.1;371.1;528.2             | 3419     | 528.2  | 283;341.6;528.1                         |
| 3443     | 21.68 | 821.4      | 116807.4      | H1N2S1                      | 3445     | 153;181;253;269;283;371.1;528.2               |          |        |                                         |
| 3628     | 22.79 | 821.4      | 17746.6       | H1N2S1                      | 3630     | 253                                           |          |        |                                         |
| 3653     | 22.96 | 821.4      | 18684.2       | H1N2S1                      | 3655     | 253                                           |          |        |                                         |
| 3493     | 22.02 | 891.4      | 53536.0       |                             | 3495     | 181;253                                       |          |        |                                         |
| 3522     | 22.19 | 891.4      | 74873.4       |                             | 3524     | 153;181;253                                   |          |        |                                         |
| 3557     | 22.38 | 891.4      | 94778.0       |                             | 3560     | 153;181;253                                   |          |        |                                         |
| 3587     | 22.55 | 891.4      | 76494.3       |                             | 3590     | 153;181;253                                   |          |        |                                         |
| 3618     | 22.73 | 891.4      | 46680.1       |                             | 3620     | 153;181                                       |          |        |                                         |
| 3586     | 22.54 | 893.3      | 73367.4       |                             | 3588     | 153;181                                       |          |        |                                         |
| 3623     | 22.75 | 893.3      | 10993.6       |                             | 3625     | 153;181                                       |          |        |                                         |
| 4095     | 25.89 | 921.4      | 25569.3       |                             | 4097     | 181                                           |          |        |                                         |
| 4357     | 27.58 | 921.4      | 47623.1       |                             | 4359     | 153;181                                       |          |        |                                         |
| 4385     | 27.75 | 921.4      | 80815.1       |                             | 4387     | 153;181                                       |          |        |                                         |
| 3427     | 21.57 | 923.4      | 18356.6       | H1N1Neu1S1(OH)1             | 3430     | 181                                           |          |        |                                         |
| 3893     | 24.58 | 923.4      | 78279.9       | H1N1Neu1S1(OH)1             | 3895     | 181;253                                       |          |        |                                         |
| 3920     | 24.75 | 923.4      | 158908.7      | H1N1Neu1S1(OH)1             | 3922     | 153;181;253;283                               |          |        |                                         |
| 3948     | 24.92 | 923.4      | 168804.9      | H1N1Neu1S1(OH)1             | 3950     | 153;181;253;283.1                             |          |        |                                         |
| 3976     | 25.10 | 923.4      | 100747.8      | H1N1Neu1S1(OH)1             | 3978     | 153;181;253                                   |          |        |                                         |
| 4438     | 28.09 | 937.4      | 53254.1       | H1N1Neu1S1                  | 4441     | 153;253                                       |          |        |                                         |
| 4467     | 28.26 | 937.4      | 196193.6      | H1N1Neu1S1                  | 4470     | 153;181;253;283                               |          |        |                                         |
| 4496     | 28.44 | 937.4      | 541440.1      | H1N1Neu1S1                  | 4499     | 153;181;253;283;371.1                         |          |        |                                         |
| 4524     | 28.61 | 937.4      | 1026299.3     | H1N1Neu1S1                  | 4527     | 153;181;253;269;283;301.1;371.1               |          |        |                                         |
| 4554     | 28.78 | 937.4      | 1532180.1     | H1N1Neu1S1                  | 4556     | 153;181;253;269;283;301.1;371.1               |          |        |                                         |
| 4584     | 28.95 | 937.4      | 1534412.2     | H1N1Neu1S1                  | 4586     | 153;181;253;269;283.1;301.1;371.1             |          |        |                                         |
| 4615     | 29.13 | 937.4      | 1205643.9     | H1N1Neu1S1                  | 4618     | 153;181;253;269;283;301.1;371.1               |          |        |                                         |
| 4646     | 29.30 | 937.4      | 699177.6      | H1N1Neu1S1                  | 4649     | 153;181;253;269;283;301.1;371.1               |          |        |                                         |
| 4676     | 29.48 | 937.4      | 313053.2      | H1N1Neu1S1                  | 4679     | 153;181;253                                   |          |        |                                         |
| 4708     | 29.65 | 937.4      | 119272.4      | H1N1Neu1S1                  | 4710     | 153;181;253                                   |          |        |                                         |
| 4437     | 28.08 | 967.4      | 25250.8       |                             | 4439     | 253                                           |          |        |                                         |
| 4466     | 28.25 | 967.4      | 40569.8       |                             | 4468     | 253;283                                       |          |        |                                         |
| 3850     | 24.30 | 995.4      | 11175.3       | F1H1N2S1                    | 3852     | 153                                           |          |        |                                         |
| 3876     | 24.47 | 995.4      | 21126.0       | F1H1N2S1                    | 3878     | 153                                           |          |        |                                         |
| 3930     | 24.81 | 995.4      | 39233.8       | F1H1N2S1                    | 3932     | 153;181                                       |          |        |                                         |
| 3959     | 24.98 | 995.4      | 26320.4       | F1H1N2S1                    | 3961     | 181                                           |          |        |                                         |
| 3304     | 20.71 | 997.4      | 30064.9       | H2N2S1(OH)2                 | 3306     | 528.2                                         |          |        |                                         |
| 3328     | 20.88 | 997.4      | 53589.3       | H2N2S1(OH)2                 | 3330     | 153;371.1;528.2                               |          |        |                                         |
| 3352     | 21.05 | 997.4      | 76942.1       | H2N2S1(OH)2                 | 3354     | 181;371.1;528.2                               | 3355     | 528.2  | 253.4;371.4                             |
| 3375     | 21.22 | 997.4      | 60441.2       | H2N2S1(OH)2                 | 3377     | 153;181;253;371.1;528.2                       |          |        |                                         |
| 3399     | 21.39 | 997.4      | 28120.5       | H2N2S1(OH)2                 | 3401     | 371.1;528.2                                   |          |        |                                         |
| 4491     | 28.41 | 1005.4     | 27783.1       |                             | 4494     | 253                                           |          |        |                                         |
| 4519     | 28.58 | 1005.4     | 62091.0       |                             | 4522     | 253                                           |          |        |                                         |
| 4549     | 28.76 | 1005.4     | 88581.4       |                             | 4552     | 253                                           |          |        |                                         |
| 4578     | 28.93 | 1005.4     | 95573.9       |                             | 4581     | 181;253                                       |          |        |                                         |
| 4611     | 29.11 | 1005.4     | 92553.1       |                             | 4614     | 253;283                                       |          |        |                                         |
| 3581     | 22.51 | 1009.4     | 10094.7       |                             | 3583     | 371.1                                         |          |        |                                         |
| 3611     | 22.69 | 1009.4     | 10684.9       |                             | 3614     | 181                                           |          |        |                                         |
| 3805     | 23.99 | 1009.4     | 25198.5       |                             | 3808     | 153;181;528.2                                 |          |        |                                         |
| 3832     | 24.17 | 1009.4     | 26682.1       |                             | 3834     | 153                                           |          |        |                                         |
| 4578     | 28.93 | 1009.4     | 10177.8       |                             | 4583     | 153;181                                       |          |        |                                         |
| 3481     | 21.93 | 1011.4     | 18904.7       | H2N2S1(OH)1                 | 3483     | 528.2                                         |          |        |                                         |
| 3857     | 24.34 | 1011.4     | 51261.3       | H2N2S1(OH)1                 | 3860     | 153;181;283;371.1                             |          |        |                                         |
| 3883     | 24.52 | 1011.4     | 123892.6      | H2N2S1(OH)1                 | 3886     | 153;181;371.1;528.2                           |          |        |                                         |
| 3910     | 24.69 | 1011.4     | 330086.9      | H2N2S1(OH)1                 | 3913     | 153;181;253;283;371.1;528.2                   | 3914     | 528.2  | 371;371.8;528                           |
| 3938     | 24.86 | 1011.4     | 467732.0      | H2N2S1(OH)1                 | 3941     | 153;181;253;283;301.1;371.1;528.2             | 3942     | 528.2  | 253.2;255.4;371.1                       |
| 3966     | 25.03 | 1011.4     | 353755.3      | H2N2S1(OH)1                 | 3969     | 153;181;253;283;371.1;528.2                   | 3970     | 528.2  | 204.9;253.4;371.1;528.2                 |
| 3994     | 25.21 | 1011.4     | 171680.9      | H2N2S1(OH)1                 | 3996     | 153;181;253;283;371.1;528.2                   | 3997     | 528.2  | 528.3                                   |
| 4020     | 25.38 | 1011.4     | 60128.6       | H2N2S1(OH)1                 | 4022     | 153;181;371.1;528.2                           |          |        |                                         |
| 4047     | 25.55 | 1011.4     | 29952.4       | H2N2S1(OH)1                 | 4049     | 153;181;371.1;528.2                           |          |        |                                         |
| 4229     | 26.78 | 1011.4     | 19937.0       | H2N2S1(OH)1                 | 4231     | 181                                           |          |        |                                         |
| 4257     | 26.95 | 1011.4     | 25305.4       | H2N2S1(OH)1                 | 4259     | 371.1                                         |          |        |                                         |
| 4196     | 26.58 | 1025.5     | 87490.7       | H2N2S1                      | 4199     | 153;181;253;283.1;301.1;371.1;528.2           |          |        |                                         |
| 4225     | 26.76 | 1025.5     | 372880.8      | H2N2S1                      | 4227     | 153;181;253;283;301.1;371.1;528.2             | 4228     | 528.2  | 180.9;283.2;498.3                       |
| 4253     | 26.93 | 1025.5     | 849763.8      | H2N2S1                      | 4255     | 153;181;253;283;301.1;371.1;528.2;614.2       | 4256     | 528.2  | 181.1;205.3;255.4;342;371.3;528.2       |
| 4281     | 27.10 | 1025.5     | 1462667.0     | H2N2S1                      | 4283     | 153;181;253;283;301.1;371.1;528.2;614.2       | 4284     | 528.2  | 153.3;255.2;283.2;285.1;371.3;528.4     |
| 4308     | 27.27 | 1025.5     | 1298067.5     | H2N2S1                      | 4310     | 153;181;253;283;301.1;371.1;528.2;614.2;702.3 | 4311     | 528.2  | 269.1;371.1;371.8;496.3;528.4           |
| 4308     | 27.27 | 1025.5     | 1298067.5     | H2N2S1                      | 4310     | 153;181;253;283;301.1;371.1;528.2;614.2;702.3 | 4312     | 702.3  | 283.1;501.7;528.4;672.2                 |
| 4336     | 27.45 | 1025.5     | 756051.0      | H2N2S1                      | 4338     | 153;181;253;283;301.1;371.1;528.2;614.2;702.3 | 4339     | 528.2  | 181.3;205.1;341.1;371.3;528.2           |
| 4363     | 27.62 | 1025.5     | 395386.7      | H2N2S1                      | 4365     | 153;181;195;253;283;301.1;371.1;528.2;702.3   | 4366     | 528.2  | 342.4                                   |
| 4391     | 27.79 | 1025.5     | 134183.5      | H2N2S1                      | 4393     | 153;181;195;253;283.1;371.1;528.2             |          |        |                                         |
| 4419     | 27.96 | 1025.5     | 54428.2       | H2N2S1                      | 4421     | 181;371.1                                     |          |        |                                         |
| 4504     | 28.49 | 1025.5     | 28591.2       | H2N2S1                      | 4507     | 153;253;371.1;528.2                           |          |        |                                         |
| 4532     | 28.66 | 1025.5     | 107311.1      | H2N2S1                      | 4535     | 153;181;253;283;371.1;528.2;702.3             | 4536     | 528.2  | 282.9;528.5                             |
| 4561     | 28.83 | 1025.5     | 246426.8      | H2N2S1                      | 4563     | 153;181;253;283;301.1;371.1;528.2;702.3       | 4565     | 528.2  | 165.8;225;339.4;371.6;528.2             |
| 4561     | 28.83 | 1025.5     | 246426.8      | H2N2S1                      | 4563     | 153;181;253;283;301.1;371.1;528.2;702.3       | 4566     | 702.3  | 371.1                                   |
| 4592     | 29.01 | 1025.5     | 396048.1      | H2N2S1                      | 4594     | 153;167;181;253;283;301.1;371.1;528.2;702.3   | 4596     | 528.2  | 153;181.8;225.2;253.2;341.1;372.5;528.1 |
| 4592     | 29.01 | 1025.5     | 396048.1      | H2N2S1                      | 4594     | 153;167;181;253;283;301.1;371.1;528.2;702.3   | 4597     | 702.3  | 370.9;427.2;457.1;528.4                 |

|      |       |        |          |               |      |                                             |      |       |                                         |
|------|-------|--------|----------|---------------|------|---------------------------------------------|------|-------|-----------------------------------------|
| 4625 | 29.18 | 1025.5 | 340552.5 | H2N2S1        | 4627 | 153;181;253;283;301.1;371.1;528.2;702.3     | 4628 | 528.2 | 153.1;253.2;371.1;528.3                 |
| 4625 | 29.18 | 1025.5 | 340552.5 | H2N2S1        | 4627 | 153;181;253;283;301.1;371.1;528.2;702.3     | 4629 | 702.3 | 301;529                                 |
| 4655 | 29.35 | 1025.5 | 223556.6 | H2N2S1        | 4657 | 153;181;253;269;283;301.1;371.1;528.2;702.3 | 4658 | 528.2 | 138.1;151.1;181;182.6;225.4;371.1;528.3 |
| 4684 | 29.53 | 1025.5 | 99499.0  | H2N2S1        | 4686 | 153;181;253;283.1;371.1;528.2;702.3         | 4687 | 528.2 | 180.9                                   |
| 4717 | 29.70 | 1025.5 | 33900.9  | H2N2S1        | 4719 | 371.1;528.2                                 |      |       |                                         |
| 4750 | 29.87 | 1025.5 | 15998.3  | H2N2S1        | 4753 | 528.2                                       |      |       |                                         |
| 4237 | 26.83 | 1093.4 | 28066.9  |               | 4239 | 181;371.1;528.2                             |      |       |                                         |
| 4266 | 27.00 | 1093.4 | 63721.6  |               | 4268 | 181;371.1;528.2                             |      |       |                                         |
| 4293 | 27.17 | 1093.4 | 88770.1  |               | 4295 | 153;181;253;371.1;528.2                     |      |       |                                         |
| 4320 | 27.34 | 1093.4 | 71779.2  |               | 4322 | 181;253;371.1;528.2                         |      |       |                                         |
| 4347 | 27.52 | 1093.4 | 42162.7  |               | 4349 | 181;371.1                                   |      |       |                                         |
| 4573 | 28.90 | 1093.4 | 20561.1  |               | 4575 | 181                                         |      |       |                                         |
| 4605 | 29.08 | 1093.4 | 21605.0  |               | 4607 | 181;253;528.2                               |      |       |                                         |
| 4638 | 29.26 | 1093.4 | 16863.6  |               | 4640 | 528.2                                       |      |       |                                         |
| 3267 | 20.43 | 1171.5 | 30913.9  | F1H2N2S1(OH)2 | 3269 | 371.1;702.3                                 |      |       |                                         |
| 3290 | 20.60 | 1171.5 | 28119.6  | F1H2N2S1(OH)2 | 3292 | 181;702.3                                   |      |       |                                         |
| 3313 | 20.77 | 1171.5 | 28036.2  | F1H2N2S1(OH)2 | 3315 | 253;371.1;702.3                             |      |       |                                         |
| 4298 | 27.21 | 1185.5 | 15478.8  | F1H2N2S1(OH)1 | 4300 | 253                                         |      |       |                                         |
| 4326 | 27.38 | 1185.5 | 66598.1  | F1H2N2S1(OH)1 | 4328 | 153;181;371.1;528.2                         |      |       |                                         |
| 4353 | 27.55 | 1185.5 | 132047.3 | F1H2N2S1(OH)1 | 4355 | 153;181;253;371.1;528.2                     |      |       |                                         |
| 4381 | 27.72 | 1185.5 | 191147.7 | F1H2N2S1(OH)1 | 4383 | 153;181;253;283;371.1;528.2                 |      |       |                                         |
| 4407 | 27.89 | 1185.5 | 153856.4 | F1H2N2S1(OH)1 | 4409 | 153;181;253;283;371.1;528.2                 |      |       |                                         |
| 4434 | 28.06 | 1185.5 | 80553.2  | F1H2N2S1(OH)1 | 4436 | 153;181                                     |      |       |                                         |
| 4462 | 28.23 | 1185.5 | 52202.6  | F1H2N2S1(OH)1 | 4464 | 153;181;371.1                               |      |       |                                         |
| 4491 | 28.41 | 1185.5 | 48915.6  | F1H2N2S1(OH)1 | 4493 | 153;181                                     |      |       |                                         |
| 4519 | 28.58 | 1185.5 | 64329.0  | F1H2N2S1(OH)1 | 4521 | 153;181                                     |      |       |                                         |
| 4548 | 28.75 | 1185.5 | 55003.7  | F1H2N2S1(OH)1 | 4550 | 283.1                                       |      |       |                                         |
| 4608 | 29.10 | 1185.5 | 28458.6  | F1H2N2S1(OH)1 | 4612 | 181;702.3                                   |      |       |                                         |
| 4641 | 29.27 | 1185.5 | 33327.4  | F1H2N2S1(OH)1 | 4643 | 253                                         |      |       |                                         |
| 4670 | 29.45 | 1185.5 | 36387.6  | F1H2N2S1(OH)1 | 4672 | 153;371.1;702.3                             |      |       |                                         |
| 4702 | 29.63 | 1185.5 | 34233.5  | F1H2N2S1(OH)1 | 4704 | 153;702.3                                   |      |       |                                         |
| 6008 | 37.95 | 1185.5 | 33391.8  | F1H2N2S1(OH)1 | 6011 | 181                                         |      |       |                                         |
| 6035 | 38.12 | 1185.5 | 68736.0  | F1H2N2S1(OH)1 | 6038 | 153;253                                     |      |       |                                         |
| 6065 | 38.29 | 1185.5 | 116514.5 | F1H2N2S1(OH)1 | 6067 | 181;253                                     |      |       |                                         |
| 6093 | 38.46 | 1185.5 | 133197.5 | F1H2N2S1(OH)1 | 6096 | 153;181;253                                 |      |       |                                         |
| 6121 | 38.64 | 1185.5 | 123602.0 | F1H2N2S1(OH)1 | 6124 | 153;181;253                                 |      |       |                                         |
| 6150 | 38.81 | 1185.5 | 69860.2  | F1H2N2S1(OH)1 | 6152 | 253                                         |      |       |                                         |
| 4420 | 27.97 | 1199.5 | 32243.6  | F1H2N2S1      | 4423 | 528.2                                       |      |       |                                         |
| 4447 | 28.14 | 1199.5 | 76859.5  | F1H2N2S1      | 4450 | 153;181;253;371.1;528.2                     |      |       |                                         |
| 4476 | 28.31 | 1199.5 | 160593.8 | F1H2N2S1      | 4478 | 153;181;253;371.1;528.2                     |      |       |                                         |
| 4504 | 28.49 | 1199.5 | 176004.4 | F1H2N2S1      | 4506 | 153;181;253;283;371.1;528.2                 |      |       |                                         |
| 4532 | 28.66 | 1199.5 | 124896.2 | F1H2N2S1      | 4534 | 153;181;253;283;371.1;528.2                 |      |       |                                         |
| 4561 | 28.83 | 1199.5 | 74295.0  | F1H2N2S1      | 4564 | 181;371.1;528.2                             |      |       |                                         |
| 4592 | 29.01 | 1199.5 | 22446.8  | F1H2N2S1      | 4595 | 181;371.1                                   |      |       |                                         |
| 4763 | 29.95 | 1199.5 | 53739.1  | F1H2N2S1      | 4766 | 153;181;371.1                               |      |       |                                         |
| 4790 | 30.12 | 1199.5 | 89307.9  | F1H2N2S1      | 4792 | 181;371.1                                   |      |       |                                         |
| 4816 | 30.30 | 1199.5 | 125704.9 | F1H2N2S1      | 4819 | 153;181;253;283;371.1;702.3                 |      |       |                                         |
| 4844 | 30.47 | 1199.5 | 120757.7 | F1H2N2S1      | 4846 | 153;181;253;371.1;702.3                     |      |       |                                         |
| 4870 | 30.64 | 1199.5 | 162708.1 | F1H2N2S1      | 4873 | 153;181;253;371.1;702.3                     |      |       |                                         |
| 4899 | 30.81 | 1199.5 | 139836.3 | F1H2N2S1      | 4901 | 153;181;253;283.1;371.1;702.3               |      |       |                                         |
| 4926 | 30.98 | 1199.5 | 122204.1 | F1H2N2S1      | 4928 | 153;181;253;371.1                           |      |       |                                         |
| 4952 | 31.15 | 1199.5 | 83776.1  | F1H2N2S1      | 4954 | 153;181;253;283                             |      |       |                                         |
| 4978 | 31.33 | 1199.5 | 35957.0  | F1H2N2S1      | 4980 | 153                                         |      |       |                                         |
| 5211 | 32.77 | 1199.5 | 31405.8  | F1H2N2S1      | 5213 | 702.3                                       |      |       |                                         |
| 5240 | 32.94 | 1199.5 | 63888.1  | F1H2N2S1      | 5242 | 181;253;702.3                               | 5243 | 702.3 | 151.2;181.2;542;702.2                   |
| 5267 | 33.11 | 1199.5 | 121494.5 | F1H2N2S1      | 5269 | 153;181;253;283;371.1;702.3;876.4           | 5270 | 702.3 |                                         |
| 5295 | 33.28 | 1199.5 | 159309.6 | F1H2N2S1      | 5297 | 153;181;253;371.1;702.3;876.4               | 5298 | 702.3 | 153;181.3;283.5                         |
| 5321 | 33.45 | 1199.5 | 195330.9 | F1H2N2S1      | 5323 | 153;181;253;283;371.1;702.3;876.4           | 5324 | 702.3 | 206.9;702.4                             |
| 5350 | 33.63 | 1199.5 | 149656.7 | F1H2N2S1      | 5352 | 153;181;253;371.1;702.3;876.4               | 5353 | 702.3 | 152.2;181.1;224.2;514.2;660.5;702.3     |
| 5377 | 33.80 | 1199.5 | 112008.5 | F1H2N2S1      | 5379 | 153;181;253;371.1;702.3;876.4               | 5381 | 702.3 | 151.1;253;283;702.7                     |
| 5406 | 33.98 | 1199.5 | 58922.6  | F1H2N2S1      | 5409 | 181;253;371.1;702.3                         | 5410 | 702.3 | 128.3;514.1;702.2                       |
| 5434 | 34.15 | 1199.5 | 29358.1  | F1H2N2S1      | 5437 | 181;253;371.1;702.3                         |      |       |                                         |
| 6166 | 38.91 | 1199.5 | 39985.3  | F1H2N2S1      | 6169 | 253                                         |      |       |                                         |
| 6194 | 39.08 | 1199.5 | 116305.1 | F1H2N2S1      | 6196 | 153;181;253;283                             |      |       |                                         |
| 6223 | 39.26 | 1199.5 | 229855.7 | F1H2N2S1      | 6225 | 153;181;253;269;301.1;371.1                 |      |       |                                         |
| 6253 | 39.43 | 1199.5 | 394200.3 | F1H2N2S1      | 6255 | 153;181;253;283;301.1;371.1                 |      |       |                                         |
| 6286 | 39.61 | 1199.5 | 504680.6 | F1H2N2S1      | 6289 | 153;181;253;269;283;301.1;371.1;528.2       |      |       |                                         |
| 6318 | 39.78 | 1199.5 | 511772.2 | F1H2N2S1      | 6320 | 153;181;253;269;283;301.1;371.1;528.2       |      |       |                                         |
| 6350 | 39.95 | 1199.5 | 403481.0 | F1H2N2S1      | 6352 | 153;181;253;283;301.1;371.1;528.2           |      |       |                                         |
| 6381 | 40.13 | 1199.5 | 269789.9 | F1H2N2S1      | 6383 | 153;181;253;283;371.1                       |      |       |                                         |
| 6410 | 40.30 | 1199.5 | 128162.8 | F1H2N2S1      | 6413 | 153;181;253;283;371.1;528.2                 |      |       |                                         |
| 6442 | 40.47 | 1199.5 | 58480.0  | F1H2N2S1      | 6445 | 253;528.2                                   |      |       |                                         |
| 6471 | 40.64 | 1199.5 | 24233.1  | F1H2N2S1      | 6474 | 528.2                                       |      |       |                                         |
| 4403 | 27.87 | 1226.6 | 36583.4  | F1H1N3S1(OH)1 | 4405 | 153                                         |      |       |                                         |
| 4431 | 28.04 | 1226.6 | 59574.8  | F1H1N3S1(OH)1 | 4433 | 181;253                                     |      |       |                                         |
| 4458 | 28.22 | 1226.6 | 48419.7  | F1H1N3S1(OH)1 | 4461 | 153;253                                     |      |       |                                         |
| 5459 | 34.31 | 1229.6 | 20967.7  | H3N2S1        | 5461 | 167;253                                     |      |       |                                         |
| 5540 | 34.82 | 1229.6 | 11833.9  | H3N2S1        | 5542 | 167                                         |      |       |                                         |
| 4592 | 29.01 | 1240.6 | 10734.9  | F1H1N3S1      | 4598 | 253                                         |      |       |                                         |
| 4626 | 29.19 | 1240.6 | 36635.0  | F1H1N3S1      | 4631 | 253                                         |      |       |                                         |
| 4659 | 29.37 | 1240.6 | 119817.7 | F1H1N3S1      | 4661 | 181;253;283                                 |      |       |                                         |
| 4688 | 29.54 | 1240.6 | 186606.2 | F1H1N3S1      | 4690 | 153;181;253;283;301.1                       |      |       |                                         |
| 4720 | 29.72 | 1240.6 | 206692.2 | F1H1N3S1      | 4723 | 153;181;253;269;283                         |      |       |                                         |
| 4754 | 29.89 | 1240.6 | 153613.0 | F1H1N3S1      | 4756 | 153;181;253;283;301.1                       |      |       |                                         |

|      |       |        |          |               |      |                                 |      |                   |
|------|-------|--------|----------|---------------|------|---------------------------------|------|-------------------|
| 4780 | 30.06 | 1240.6 | 80431.9  | F1H1N3S1      | 4782 | 153;181;253                     |      |                   |
| 4806 | 30.23 | 1240.6 | 32660.6  | F1H1N3S1      | 4809 | 253                             |      |                   |
| 5343 | 33.59 | 1267.5 | 14245.8  |               | 5345 | 702.3                           |      |                   |
| 6258 | 39.46 | 1267.5 | 32453.4  |               | 6260 | 253                             |      |                   |
| 6291 | 39.63 | 1267.5 | 34591.2  |               | 6293 | 253                             |      |                   |
| 6322 | 39.81 | 1267.5 | 30626.4  |               | 6324 | 253                             |      |                   |
| 6355 | 39.98 | 1267.5 | 32135.3  |               | 6357 | 253                             |      |                   |
| 6386 | 40.15 | 1267.5 | 16258.7  |               | 6388 | 253                             |      |                   |
| 4644 | 29.29 | 1270.6 | 10961.1  | H2N3S1        | 4647 | 371.1;528.2                     |      |                   |
| 5010 | 31.52 | 1270.6 | 15055.0  | H2N3S1        | 5013 | 181                             |      |                   |
| 4662 | 29.39 | 1308.6 | 11957.4  |               | 4664 | 253                             |      |                   |
| 5173 | 32.53 | 1345.6 | 27320.9  |               | 5176 | 153;253                         |      |                   |
| 4886 | 30.73 | 1357.6 | 12957.8  |               | 4891 | 181                             |      |                   |
| 6489 | 40.74 | 1357.6 | 21545.9  |               | 6491 | 283.1                           |      |                   |
| 4916 | 30.92 | 1359.6 | 20459.7  | F2H2N2S1(OH)1 | 4918 | 181                             |      |                   |
| 4969 | 31.26 | 1359.6 | 50544.6  | F2H2N2S1(OH)1 | 4971 | 153;181;371.1;702.3             |      |                   |
| 4996 | 31.43 | 1359.6 | 69474.4  | F2H2N2S1(OH)1 | 4998 | 153;181;702.3                   |      |                   |
| 5025 | 31.61 | 1359.6 | 66122.9  | F2H2N2S1(OH)1 | 5028 | 181;702.3                       |      |                   |
| 5054 | 31.78 | 1359.6 | 62796.8  | F2H2N2S1(OH)1 | 5056 | 181;371.1                       |      |                   |
| 5929 | 37.43 | 1359.6 | 26817.4  | F2H2N2S1(OH)1 | 5932 | 153;181                         |      |                   |
| 5956 | 37.61 | 1359.6 | 52618.2  | F2H2N2S1(OH)1 | 5958 | 153;181;253                     |      |                   |
| 5982 | 37.78 | 1359.6 | 94280.6  | F2H2N2S1(OH)1 | 5985 | 153;181;253                     |      |                   |
| 6010 | 37.96 | 1359.6 | 73979.7  | F2H2N2S1(OH)1 | 6013 | 153;181;253                     |      |                   |
| 6066 | 38.30 | 1359.6 | 21057.8  | F2H2N2S1(OH)1 | 6069 | 181                             |      |                   |
| 4982 | 31.35 | 1373.6 | 40485.4  | F2H2N2S1      | 4984 | 181                             |      |                   |
| 5010 | 31.52 | 1373.6 | 54533.1  | F2H2N2S1      | 5012 | 181;283.1;702.3                 |      |                   |
| 5040 | 31.70 | 1373.6 | 67632.4  | F2H2N2S1      | 5042 | 153;181;253;371.1;702.3         |      |                   |
| 5068 | 31.87 | 1373.6 | 73986.7  | F2H2N2S1      | 5070 | 181;253                         |      |                   |
| 5096 | 32.04 | 1373.6 | 63257.6  | F2H2N2S1      | 5098 | 153;181;253;371.1               |      |                   |
| 5125 | 32.21 | 1373.6 | 57367.3  | F2H2N2S1      | 5127 | 153;181                         |      |                   |
| 5151 | 32.38 | 1373.6 | 41585.5  | F2H2N2S1      | 5153 | 371.1;702.3                     |      |                   |
| 5178 | 32.55 | 1373.6 | 29170.2  | F2H2N2S1      | 5180 | 153                             |      |                   |
| 5233 | 32.90 | 1373.6 | 12655.5  | F2H2N2S1      | 5236 | 702.3                           |      |                   |
| 6178 | 38.98 | 1373.6 | 11844.8  | F2H2N2S1      | 6181 | 181                             |      |                   |
| 6209 | 39.16 | 1373.6 | 39827.3  | F2H2N2S1      | 6211 | 181;253                         |      |                   |
| 6236 | 39.33 | 1373.6 | 91340.1  | F2H2N2S1      | 6239 | 153;181;253;269;283             |      |                   |
| 6266 | 39.50 | 1373.6 | 184709.1 | F2H2N2S1      | 6269 | 153;181;253;283;301.1;371.1     |      |                   |
| 6300 | 39.68 | 1373.6 | 291115.2 | F2H2N2S1      | 6303 | 153;181;253;269;283             |      |                   |
| 6332 | 39.85 | 1373.6 | 314516.2 | F2H2N2S1      | 6335 | 153;181;253;283;301.1;371.1     |      |                   |
| 6364 | 40.02 | 1373.6 | 256770.0 | F2H2N2S1      | 6367 | 153;181;253;269;283;301.1;371.1 |      |                   |
| 6392 | 40.20 | 1373.6 | 167452.9 | F2H2N2S1      | 6396 | 153;181;253;283.1;301.1         |      |                   |
| 6424 | 40.38 | 1373.6 | 87265.0  | F2H2N2S1      | 6427 | 153;253                         |      |                   |
| 6455 | 40.55 | 1373.6 | 34227.6  | F2H2N2S1      | 6458 | 253                             |      |                   |
| 5775 | 36.44 | 1386.6 | 11196.2  | H2N2Neu2S1    | 5777 | 528.2                           |      |                   |
| 5806 | 36.65 | 1386.6 | 13257.6  | H2N2Neu2S1    | 5808 | 181;371.1;528.2                 |      |                   |
| 5834 | 36.83 | 1386.6 | 16276.7  | H2N2Neu2S1    | 5838 | 528.2                           |      |                   |
| 6264 | 39.49 | 1441.6 | 11352.1  |               | 6267 | 253                             |      |                   |
| 6361 | 40.01 | 1441.6 | 15901.0  |               | 6365 | 253                             |      |                   |
| 5115 | 32.16 | 1460.7 | 18600.5  | H3N3S1(OH)1   | 5118 | 371.1;528.2                     |      |                   |
| 5142 | 32.33 | 1460.7 | 21815.8  | H3N3S1(OH)1   | 5144 | 153;371.1;528.2                 |      |                   |
| 5167 | 32.50 | 1460.7 | 19086.2  | H3N3S1(OH)1   | 5169 | 253;371.1;528.2                 |      |                   |
| 5252 | 33.02 | 1460.7 | 13917.7  | H3N3S1(OH)1   | 5254 | 371.1;528.2                     |      |                   |
| 5279 | 33.19 | 1460.7 | 10649.1  | H3N3S1(OH)1   | 5281 | 371.1                           |      |                   |
| 5443 | 34.20 | 1474.7 | 10541.2  | H3N3S1        | 5445 | 528.2                           |      |                   |
| 5470 | 34.37 | 1474.7 | 32720.7  | H3N3S1        | 5472 | 371.1;528.2                     |      |                   |
| 5496 | 34.54 | 1474.7 | 52606.2  | H3N3S1        | 5498 | 181;371.1;528.2                 |      |                   |
| 5524 | 34.72 | 1474.7 | 68425.1  | H3N3S1        | 5526 | 153;181;253;371.1;528.2         |      |                   |
| 5550 | 34.89 | 1474.7 | 44621.9  | H3N3S1        | 5552 | 153;181;371.1;528.2             |      |                   |
| 5577 | 35.06 | 1474.7 | 39792.1  | H3N3S1        | 5579 | 181;528.2                       |      |                   |
| 5601 | 35.23 | 1474.7 | 26952.7  | H3N3S1        | 5603 | 181;371.1;528.2                 |      |                   |
| 5624 | 35.41 | 1474.7 | 26016.7  | H3N3S1        | 5627 | 528.2                           |      |                   |
| 5648 | 35.58 | 1474.7 | 23091.1  | H3N3S1        | 5653 | 528.2                           |      |                   |
| 5761 | 36.36 | 1474.7 | 23346.5  | H3N3S1        | 5763 | 181;528.2                       |      |                   |
| 5788 | 36.54 | 1474.7 | 39393.5  | H3N3S1        | 5790 | 153;181;371.1;528.2             |      |                   |
| 5816 | 36.71 | 1474.7 | 45744.3  | H3N3S1        | 5818 | 181;371.1;528.2                 |      |                   |
| 5843 | 36.89 | 1474.7 | 31760.2  | H3N3S1        | 5845 | 181;371.1;528.2                 |      |                   |
| 5870 | 37.06 | 1474.7 | 22536.5  | H3N3S1        | 5872 | 181;371.1                       |      |                   |
| 5895 | 37.22 | 1474.7 | 20966.0  | H3N3S1        | 5898 | 528.2                           |      |                   |
| 6418 | 40.35 | 1560.7 | 11704.6  | F1H2N2Neu1S1  | 6422 | 702.3                           |      |                   |
| 6479 | 40.69 | 1560.7 | 23842.1  | F1H2N2Neu1S1  | 6482 | 702.3                           |      |                   |
| 6508 | 40.86 | 1560.7 | 32574.8  | F1H2N2Neu1S1  | 6510 | 181;702.3                       |      |                   |
| 6537 | 41.03 | 1560.7 | 28296.8  | F1H2N2Neu1S1  | 6539 | 253;702.3                       |      |                   |
| 6565 | 41.20 | 1560.7 | 19631.5  | F1H2N2Neu1S1  | 6567 | 702.3                           |      |                   |
| 6451 | 40.52 | 1560.7 | 15745.3  | F1H2N2Neu1S1  | 6453 | 371.1;702.3                     |      |                   |
| 6591 | 41.38 | 1560.7 | 13221.3  | F1H2N2Neu1S1  | 6594 | 702.3                           |      |                   |
| 6440 | 40.46 | 1648.8 | 10146.3  | F1H3N3S1      | 6443 | 528.2;702.3                     |      |                   |
|      |       |        |          |               |      |                                 | 5500 | 528.2 153.1       |
|      |       |        |          |               |      |                                 | 5527 | 528.2 180.9;371.2 |
|      |       |        |          |               |      |                                 | 5553 | 528.2             |

The MS2 scan entries were first filtered from the raw dataset based on its containing at least a sulfated glycopeptide-specific ion detected at 10 ppm. This created a full list of 297 MS2 scans, each tracked back to its preceding MS1 scans, including 4 pairs of duplicate entries due to the same MS2 scan was used to trigger 2 events of pd-MS3, namely m/z 528 and 702. Both the MS1 and MS2 scan columns were shaded in light blue with the aforementioned duplicate pairs in darker blue shades. Subsequently, additional filterings were applied in the following order: 1) retention time within 20-42 min, 2) eliminate those few entries with elution time inconsistent with its m/z, and 3) those MS2 scans containing only a single ion at m/z 195, 296 and 371. This led to an "edited" list of 258 scans in total. The cells in the column for monoisotopic m/z was colored if it can be fitted to glycosyl composition (H, Hex; N, HexNAc; F, Fuc; Neu, NeuAc; S, sulfate; OH, free hydroxyl group due to under methylation) and differentiated in color shades by whether its MS2 contained m/z 528 (gold), m/z 702 (light orange), both (darker orange), or neither (pale yellow). Cells in the MS2 selected ions column were similarly color coded according to whether it contained m/z 528 (gold), 702 (orange) or both (darker orange). Cells in the column for MS1 precursor intensity with a value > 50,000 were colored in different shades of green to reflect abundance, except for the 3 larger glycan isomers at m/z 1460.7, 1474.7 and 1560.7, which peaked at 32.33 min, 36.71 min, and 40.86 min, respectively, at lower intensity values.

**Table S4. NanoLC-MS<sup>2</sup>-pd-MS<sup>3</sup> dataset for the permethylated N-glycans of mouse brain striatum,** in multiple Excel sheets (available online as standalone Supplemental Data file):

1) **Info & Glycotope Sheet** (this page) tabulates the input parameters for data mining using GlyPick, and the summed intensity and spectral counts data for the selected MS<sup>2</sup> and MS<sup>3</sup> diagnostic ions. Under-methylation and the additional ammonium and sodium adducts were not considered in the initial round of glycosyl composition fitting to generate the **A-list**. Fitted MS<sup>2</sup> scans will be removed for a second iteration to generate the **B-list**. The remaining MS<sup>2</sup> scans, which could not be fitted were compiled into **C-list**.

2) **A-list Sheets** present the compiled A-list in 3 different views. The **first** is the most comprehensive list containing a total of 3840 MS<sup>2</sup> scans (after editing out unreasonable ones) grouped into 454 unique precursor N-glycans. MS<sup>1</sup> intensity and MS<sup>2</sup> entries containing the target MS<sup>2</sup> and MS<sup>3</sup> ions are color-shaded for ease of reference. The **second** is a simplified list after removing the individual entries, keeping only the headers for a total of **352** unique N-glycans with summed MS<sup>1</sup> and MS<sup>2</sup> ion intensities. Entries corresponding to the most abundant N-glycans (by summed MS<sup>1</sup> intensity) are highlighted, whereas those seemingly fitting to unreasonable glycosyl composition were hidden (but not deleted). The **third** is a glycotope-centric list containing only MS<sup>2</sup> entries associated with successful pd-MS<sup>3</sup>. In this case, there were **291** successful pd-MS<sup>3</sup> scans on either *m/z* 1186 or 737, but only **223** of which fitted to glycosyl composition having at least 2 sialic acids to make DiSia possible. 91 were contributed by *m/z* 737, 132 by *m/z* 1186.

3) **B-list Sheets** present the compiled B-list in 3 different views similar to the A-list. No further manual editing was made. A total of **345** successful pd-MS<sup>3</sup> scans were triggered on either *m/z* 1186 or 737, **221** of which fitted to glycosyl composition having at least 2 sialic acids, with 86 contributed by *m/z* 737, and 135 by *m/z* 1186.

4) **C-list Sheet** compiled the MS<sup>2</sup> entries that could not be fitted to glycosyl composition even after considering under-methylation and extra adducts. No grouping nor editing was attempted. Using the charge state determined for the *m/z* of precursor, the assumed [M+H]<sup>+</sup> *m/z* values were computed. This list contains an additional **118** productive MS<sup>3</sup> scans triggered on either *m/z* 1186 (66) or 737 (52) but no further filtering by the criteria of containing at least 2 Sia in deduced glycosyl composition could be applied.

| Glycotope | Count | Intensity  | %          | MS2    | MS3 | Glycotope | Count      | Intensity | %       | %    |
|-----------|-------|------------|------------|--------|-----|-----------|------------|-----------|---------|------|
| 260       | 22475 | 1509531830 | 32%        | 638.3  | 228 | H1        | 131        | 29897     | 1%      | 1%   |
| 376       | 20120 | 865049643  | 19%        | 638.3  | 606 | H2        | 1931       | 1170971   | 28%     | 26%  |
| 450       | 19897 | 1021687854 | 22%        | 638.3  | 402 | LeA       | 158        | 63563     | 2%      | 1%   |
| 464       | 17488 | 411365113  | 9%         | 638.3  | 432 | LeX       | 6796       | 2938237   | 70%     | 64%  |
| 505       | 2     | 13225      | 0%         |        |     |           |            | 4202668   | 100%    | 92%  |
| 624       | 326   | 1650824    | 0%         |        |     |           |            |           |         |      |
| 638       | 19291 | 569428526  | 12%        | 737.4  | 376 | DiSia     | 273        | 102735    |         | 2%   |
| 679       | 91    | 588653     | 0%         |        |     |           |            |           |         |      |
| 737       | 3805  | 16205788   | 0%         | 1186.6 | 737 | DiSia1    | 358        | 264043    | 93%     | 6%   |
| 812       | 58    | 558097     | 0%         | 1186.6 | 589 | DiSia2    | 33         | 19448     | 7%      | 0%   |
| 825       | 5889  | 192221267  | 4%         |        |     |           |            | 283491    | 100%    | 6%   |
| 913       | 47    | 279377     | 0%         |        |     |           |            |           |         |      |
| 999       | 163   | 1251940    | 0%         |        |     |           |            |           |         |      |
| 1186      | 7683  | 71170101   | 2%         |        |     |           |            |           |         |      |
|           |       |            |            |        |     |           | All Total: | 9680      | 4588893 | 100% |
|           |       |            | 4661002238 |        |     |           |            |           |         | 100% |

| Number of Spectra    | MS1  | MS2   | MS3   |
|----------------------|------|-------|-------|
| Total                | 4141 | 26210 | 11608 |
| Within RT            | 2018 | 14035 | 11429 |
| Selected by MS2 ions | 1705 | 11953 | 11380 |
| Fitted Composition   | 704  | 2540  | 3629  |

| Spectral Settings    |        |
|----------------------|--------|
| MS1 Tolerance        | 5 ppm  |
| Starting Time        | 20 min |
| Ending Time          | 70 min |
| Min selected ms2 ion | 2      |
| MS2 Tolerance        | 5 ppm  |
| MS2 Threshold        | 100    |
| MS2 Relative %       | 1      |
| MS3 Tolerance        | 0.5 Da |
| MS3 Threshold        | 0      |
| MS3 Relative %       | 0      |

| Glycan Settings    |     |     |
|--------------------|-----|-----|
| Number of Residues | Max | Min |
| dHex               | 5   | 0   |
| Hex                | 9   | 0   |
| HexNAc             | 7   | 0   |
| NeuAc              | 7   | 0   |

|              |               |
|--------------|---------------|
| Reducing end | Free          |
| Form         | Permethylated |
| Ion Mode     | Positive      |
| Under PerMe  | 2             |

| N-glycan Rules:                    |
|------------------------------------|
| Trimannosyl core                   |
| Antenna (2(total HexNAc-2>=dHex-1) |
| LacNAc(NeuAc+(dHex-1) <= LacNAc*2) |

| Adducts & Charges |            |
|-------------------|------------|
| Adduct Settings:  | H, NH3, Na |
| Charge State      | 2, 3, 4    |

| MS3 Glycotopes |        |          |
|----------------|--------|----------|
| MS2 Precursors | Name   | MS3 Ions |
| 1186.596       | DiSLN1 | 737.4    |
| 1186.596       | DiSLN2 | 589.3    |
| 737.370        | DiS    | 376.2    |

**Table S5. List of MS2 scans containing the diagnostic ion at m/z 1186 for the target disialyl LacNAc glycocone, which yielded the diagnostic pd-MS3 ion at m/z 737.** The entries compiled in this Table were filtered from the same nanoLC-MS/MS dataset reported in Table S4 but arranged in a slightly different format and sorted according to the MS2 scan numbers. The corresponding annotated MS2 spectra of these 71 entries are collated in a Supplemental Figure S7. MS2 scans containing m/z 1186 but not further triggered for MS3 or did not give m/z 737 in the resulting MS3 spectra were excluded. Those that could not be fitted with glycosyl compositions containing  $\geq 2$  NeuAc were also discarded.

| MS2 Scan | MS2 Selected Ions                                | MS1 Scan | m/z (Trig) | m/z (Mono) | Z | Intensity | [M+Na] <sup>+</sup> m/z | dHex | Hex | Hex NAc | Neu Ac | MS3 Scan | pd MS2 Ion | Matched m/z | Deduced Glycotopes |
|----------|--------------------------------------------------|----------|------------|------------|---|-----------|-------------------------|------|-----|---------|--------|----------|------------|-------------|--------------------|
| 18331    | 260.1;376.2;464.2;638.3;1186.6                   | 18273    | 1370.697   | 1370.697   | 2 | 663060    | 2762.373                | 1    | 4   | 4       | 2      | 18335    | 1186.6     | 737.7       | DiSLN1             |
| 19290    | 260.1;376.2;450.2;464.2;638.3;825.4;1186.6       | 19253    | 1493.769   | 1493.265   | 2 | 1551854   | 3007.499                | 1    | 4   | 5       | 2      | 19293    | 1186.6     | 737.5       | DiSLN1             |
| 19502    | 260.1;376.2;450.2;464.2;638.3;825.4;1186.6       | 19461    | 1473.757   | 1472.752   | 2 | 1401877   | 2966.472                | 1    | 5   | 4       | 2      | 19506    | 1186.6     | 737.5       | DiSLN1             |
| 19932    | 260.1;376.2;450.2;464.2;638.3;825.4;999.5;1186.6 | 19888    | 1077.891   | 1077.555   | 3 | 2940393   | 3252.625                | 1    | 4   | 6       | 2      | 19936    | 1186.6     | 737.8       | DiSLN1             |
| 19989    | 260.1;376.2;450.2;464.2;638.3;1186.6             | 19922    | 1653.843   | 1653.343   | 2 | 842607    | 3327.646                | 1    | 5   | 4       | 3      | 19992    | 1186.6     | 737.5       | DiSLN1             |
| 20100    | 260.1;376.2;450.2;464.2;1186.6                   | 20032    | 1662.351   | 1661.851   | 2 | 757075    | 3344.661                | 2    | 6   | 4       | 2      | 20103    | 1186.6     | 737.7       | DiSLN1             |
| 20432    | 260.1;376.2;450.2;464.2;638.3;1186.6             | 20396    | 1145.924   | 1145.590   | 3 | 5909167   | 3456.725                | 1    | 5   | 6       | 2      | 20443    | 1186.6     | 737.5       | DiSLN1             |
| 20507    | 260.1;376.2;450.2;464.2;638.3;1186.6             | 20469    | 1112.900   | 1112.566   | 3 | 1844131   | 3357.657                | 0    | 6   | 4       | 3      | 20511    | 1186.6     | 737.6       | DiSLN1             |
| 20803    | 260.1;376.2;450.2;464.2;638.3;1186.6             | 20766    | 1040.535   | 1040.201   | 3 | 4078534   | 3140.562                | 2    | 5   | 4       | 2      | 20807    | 1186.6     | 737.6       | DiSLN1             |
| 20834    | 260.1;376.2;450.2;638.3;825.4;1186.6             | 20766    | 1682.360   | 1682.360   | 2 | 787536    | 3385.688                | 2    | 5   | 5       | 2      | 20838    | 1186.6     | 737.6       | DiSLN1             |
| 20954    | 260.1;376.2;450.2;464.2;638.3;1186.6             | 20914    | 1311.004   | 1310.335   | 3 | 4265628   | 3950.961                | 2    | 6   | 5       | 3      | 20961    | 1186.6     | 737.6       | DiSLN1             |
| 21482    | 260.1;376.2;450.2;464.2;638.3;1186.6             | 21433    | 1455.075   | 1454.407   | 3 | 1976968   | 4383.172                | 1    | 6   | 6       | 4      | 21485    | 1186.6     | 737.6       | DiSLN1             |
| 21687    | 260.1;376.2;450.2;464.2;638.3;1186.6             | 21618    | 1405.712   | 1405.712   | 3 | 751699    | 4237.114                | 2    | 5   | 7       | 3      | 21691    | 1186.6     | 737.6       | DiSLN1             |
| 22000    | 260.1;376.2;450.2;464.2;638.3;1186.6             | 21958    | 1252.974   | 1252.306   | 3 | 1811328   | 3776.872                | 1    | 6   | 5       | 3      | 22004    | 1186.6     | 737.6       | DiSLN1             |
| 22259    | 260.1;376.2;450.2;464.2;638.3;999.5;1186.6       | 22220    | 1204.287   | 1203.617   | 3 | 6267915   | 3630.814                | 2    | 5   | 6       | 2      | 22262    | 1186.6     | 737.5       | DiSLN1             |
| 22386    | 260.1;376.2;450.2;464.2;638.3;1186.6             | 22334    | 1266.981   | 1265.979   | 3 | 1825801   | 3817.899                | 1    | 5   | 6       | 3      | 22390    | 1186.6     | 737.5       | DiSLN1             |
| 22642    | 260.1;376.2;450.2;464.2;638.3;1186.6             | 22598    | 1001.264   | 1000.764   | 4 | 1834442   | 4021.998                | 1    | 6   | 6       | 3      | 22648    | 1186.6     | 737.5       | DiSLN1             |
| 22652    | 260.1;376.2;450.2;464.2;638.3;1186.6             | 22598    | 1305.997   | 1304.661   | 3 | 1118642   | 3933.946                | 1    | 5   | 5       | 4      | 22656    | 1186.6     | 737.4       | DiSLN1             |
| 22661    | 260.1;376.2;450.2;464.2;638.3;825.4;1186.6       | 22598    | 1575.463   | 1575.463   | 3 | 970759    | 4746.361                | 0    | 8   | 8       | 3      | 22665    | 1186.6     | 737.5       | DiSLN1             |
| 22679    | 260.1;376.2;450.2;464.2;638.3;1186.6             | 22638    | 1120.821   | 1120.068   | 4 | 2558044   | 4499.219                | 1    | 6   | 5       | 5      | 22682    | 1186.6     | 737.5       | DiSLN1             |
| 22709    | 260.1;376.2;450.2;464.2;638.3;1186.6             | 22638    | 1320.339   | 1320.339   | 3 | 1039343   | 3980.972                | 1    | 7   | 5       | 3      | 22714    | 1186.6     | 737.4       | DiSLN1             |
| 22803    | 260.1;376.2;450.2;464.2;638.3;1186.6             | 22754    | 1455.741   | 1455.741   | 3 | 2619889   | 4387.192                | 4    | 7   | 6       | 2      | 22807    | 1186.6     | 737.4       | DiSLN1             |
| 22896    | 260.1;376.2;450.2;464.2;638.3;1186.6             | 22836    | 1528.453   | 1528.112   | 3 | 905456    | 4604.287                | 2    | 8   | 6       | 3      | 22899    | 1186.6     | 737.6       | DiSLN1             |
| 22914    | 260.1;376.2;450.2;464.2;638.3;737.4;1186.6       | 22874    | 1431.395   | 1430.727   | 3 | 2260900   | 4312.135                | 2    | 6   | 5       | 4      | 22920    | 1186.6     | 737.7       | DiSLN1             |
| 23066    | 260.1;376.2;450.2;464.2;638.3;737.4;1186.6       | 23022    | 1493.755   | 1493.755   | 3 | 1497918   | 4501.235                | 0    | 8   | 7       | 3      | 23069    | 1186.6     | 737.6       | DiSLN1             |
| 23080    | 260.1;376.2;450.2;464.2;638.3;1186.6             | 23022    | 1524.112   | 1523.776   | 3 | 859800    | 4591.292                | 4    | 8   | 6       | 2      | 23086    | 1186.6     | 737.6       | DiSLN1             |
| 23103    | 260.1;376.2;450.2;464.2;638.3;1186.6             | 23063    | 1373.697   | 1372.696   | 3 | 2554051   | 4138.046                | 1    | 6   | 5       | 4      | 23108    | 1186.6     | 737.8       | DiSLN1             |
| 23128    | 260.1;376.2;450.2;464.2;638.3;737.4;1186.6       | 23063    | 1614.150   | 1614.150   | 3 | 823397    | 4862.409                | 0    | 8   | 7       | 4      | 23133    | 1186.6     | 737.1       | DiSLN1             |
| 23230    | 260.1;376.2;450.2;464.2;638.3;1186.6             | 23170    | 1460.747   | 1460.079   | 3 | 2000960   | 4400.187                | 2    | 7   | 6       | 3      | 23235    | 1186.6     | 737.6       | DiSLN1             |
| 23286    | 260.2;376.2;450.2;464.2;1186.6                   | 23249    | 1523.107   | 1522.440   | 3 | 5414422   | 4587.272                | 1    | 7   | 6       | 4      | 23290    | 1186.6     | 737.5       | DiSLN1             |
| 23559    | 260.1;376.2;450.2;464.2;638.3;737.4;1186.6       | 23509    | 1473.752   | 1473.752   | 3 | 1265933   | 4441.214                | 2    | 6   | 7       | 3      | 23567    | 1186.6     | 737.6       | DiSLN1             |
| 23649    | 260.1;376.2;450.2;464.2;638.3;1186.6             | 23583    | 1537.792   | 1537.452   | 3 | 913390    | 4632.318                | 4    | 7   | 7       | 2      | 23655    | 1186.6     | 737.3       | DiSLN1             |
| 23661    | 260.1;376.2;450.2;464.2;638.3;825.4;1186.6       | 23622    | 1186.105   | 1185.604   | 4 | 8732457   | 4761.361                | 2    | 7   | 6       | 4      | 23670    | 1186.6     | 737.7       | DiSLN1             |
| 23807    | 260.1;376.2;450.2;464.2;638.3;825.4;1186.6       | 23733    | 1378.370   | 1378.370   | 3 | 1422772   | 4155.061                | 2    | 7   | 5       | 3      | 23811    | 1186.6     | 737.5       | DiSLN1             |
| 23997    | 260.1;376.2;450.2;464.2;638.3;1186.6             | 23960    | 1233.127   | 1232.376   | 4 | 10064271  | 4948.446                | 1    | 7   | 6       | 5      | 24001    | 1186.6     | 737.6       | DiSLN1             |
| 24097    | 260.1;376.2;450.2;464.2;638.3;825.4;1186.6       | 24035    | 1386.698   | 1386.369   | 3 | 975443    | 4179.072                | 1    | 5   | 6       | 4      | 24105    | 1186.6     | 737.5       | DiSLN1             |
| 24435    | 260.1;376.2;450.2;464.2;638.3;1186.6             | 24383    | 1387.706   | 1387.706   | 3 | 1072652   | 4183.092                | 4    | 6   | 6       | 2      | 24444    | 1186.6     | 737.5       | DiSLN1             |
| 24437    | 260.1;376.2;450.2;464.2;638.3;737.4;1186.6       | 24383    | 1513.438   | 1512.433   | 3 | 905481    | 4557.261                | 2    | 6   | 6       | 4      | 24442    | 1186.6     | 737.6       | DiSLN1             |
| 24491    | 260.1;376.2;450.2;464.2;638.3;1186.6             | 24456    | 1139.334   | 1138.833   | 4 | 5078384   | 4574.277                | 3    | 7   | 6       | 3      | 24496    | 1186.6     | 737.5       | DiSLN1             |
| 24627    | 260.1;376.2;450.2;464.2;638.3;737.4;1186.6       | 24566    | 1764.224   | 1763.222   | 3 | 1068922   | 5309.619                | 1    | 7   | 6       | 6      | 24632    | 1186.6     | 737.6       | DiSLN1             |
| 24681    | 260.1;376.2;450.2;464.2;638.3;737.4;1186.6       | 24641    | 1503.750   | 1503.750   | 4 | 1560541   | 6033.982                | 0    | 9   | 8       | 6      | 24684    | 1186.6     | 737.6       | DiSLN1             |
| 24717    | 260.1;376.2;450.2;464.2;638.3;1186.6             | 24680    | 1258.646   | 1257.978   | 3 | 8814630   | 3793.887                | 2    | 7   | 5       | 2      | 24723    | 1186.6     | 737.8       | DiSLN1             |
| 24797    | 260.1;376.2;450.2;464.2;638.3;1186.6             | 24757    | 1127.580   | 1127.580   | 4 | 1953409   | 4529.266                | 2    | 7   | 8       | 2      | 24801    | 1186.6     | 737.7       | DiSLN1             |
| 24853    | 260.1;376.2;450.2;464.2;638.3;737.4;1186.6       | 24794    | 1441.397   | 1440.726   | 3 | 827553    | 4342.146                | 1    | 7   | 5       | 4      | 24861    | 1186.6     | 737.4       | DiSLN1             |
| 24875    | 260.1;376.2;450.2;464.2;638.3;825.4;1186.6       | 24832    | 1049.041   | 1048.540   | 4 | 3254083   | 4213.103                | 3    | 7   | 6       | 2      | 24881    | 1186.6     | 737.5       | DiSLN1             |
| 25014    | 260.1;376.2;450.2;464.2;638.3;737.4;1186.6       | 24952    | 1512.431   | 1508.754   | 3 | 953800    | 4546.245                | 1    | 8   | 5       | 4      | 25024    | 1186.6     | 737.6       | DiSLN1             |
| 25054    | 260.1;376.2;450.2;464.2;638.3;1186.6             | 24994    | 1656.836   | 1656.500   | 3 | 882947    | 4989.472                | 1    | 6   | 7       | 5      | 25058    | 1186.6     | 737.6       | DiSLN1             |
| 25073    | 376.2;464.3;638.3;737.4;1186.6                   | 24994    | 1884.946   | 1884.946   | 3 | 713349    | 5674.813                | 4    | 8   | 6       | 5      | 25074    | 1186.6     | 737.5       | DiSLN1             |
| 25154    | 260.1;376.2;450.2;464.2;638.3;737.4;1186.6       | 25113    | 1366.692   | 1366.692   | 4 | 2370569   | 5485.724                | 1    | 9   | 8       | 4      | 25162    | 1186.6     | 737.5       | DiSLN1             |
| 25508    | 260.2;376.2;450.2;464.3;638.3;1186.6             | 25456    | 1763.885   | 1763.885   | 3 | 995552    | 5311.635                | 0    | 9   | 8       | 4      | 25512    | 1186.6     | 737.6       | DiSLN1             |
| 25572    | 260.1;376.2;450.2;464.2;638.3;1186.6             | 25530    | 1271.651   | 1271.651   | 3 | 1854444   | 3834.914                | 2    | 6   | 6       | 2      | 25577    | 1186.6     | 737.5       | DiSLN1             |
| 25581    | 260.1;376.2;450.2;464.2;638.3;1186.6             | 25530    | 1701.529   | 1701.529   | 3 | 1021070   | 5124.550                | 1    | 9   | 8       | 3      | 25585    | 1186.6     | 737.5       | DiSLN1             |
| 25823    | 260.2;376.2;450.2;464.3;638.3;825.4;1186.6       | 25756    | 1498.762   | 1498.762   | 3 | 681820    | 4516.235                | 2    | 7   | 5       | 4      | 25828    | 1186.6     | 737.7       | DiSLN1             |
| 25889    | 260.1;376.2;450.2;464.3;638.3;825.4;1186.6       | 25833    | 1513.106   | 1513.106   | 3 | 786230    | 4559.277                | 1    | 8   | 8       | 2      | 25893    | 1186.6     | 737.3       | DiSLN1             |
| 26311    | 260.1;376.2;450.2;464.3;638.3;825.4;1186.6       | 26268    | 1431.726   | 1431.726   | 4 | 998725    | 5745.850                | 3    | 8   | 7       | 5      | 26315    | 1186.6     | 737.4       | DiSLN1             |
| 26358    | 260.1;376.2;450.2;464.2;638.3;1186.6             | 26300    | 1600.475   | 1599.812   | 3 | 563429    | 4819.403                | 3    | 7   | 7       | 3      | 26365    | 1186.6     | 737.4       | DiSLN1             |
| 26548    | 260.1;376.2;450.2;464.2;638.3;737.4;825.4;1186.6 | 26513    | 1330.350   | 1329.682   | 3 | 3688103   | 4009.003                | 3    | 6   | 6       | 2      | 26560    | 1186.6     | 737.4       | DiSLN1             |
| 26563    | 260.1;376.2;450.2;464.2;638.3;1186.6             | 26513    | 1258.642   | 1258.642   | 4 | 1012299   | 5053.513                | 2    | 9   | 7       | 3      | 26567    | 1186.6     | 737.6       | DiSLN1             |
| 26654    | 260.1;376.2;450.2;464.2;638.3;1186.6             | 26584    | 1658.834   | 1658.506   | 3 | 597124    | 4995.471                | 1    | 9   | 6       | 4      | 26659    | 1186.6     | 737.5       | DiSLN1             |
| 26854    | 260.1;376.2;450.2;464.3;638.3;737.4;1186.6       | 26807    | 1450.729   | 1450.729   | 3 | 619511    | 4372.156                | 0    | 8   | 5       | 4      | 26863    | 1186.6     | 737.3       | DiSLN1             |
| 26926    | 260.1;376.2;450.2;464.2;638.3;1186.6             | 26878    | 1668.515   | 1667.844   | 3 | 920447    | 5023.503                | 3    | 8   | 7       | 3      | 26935    | 1186.6     | 737.4       | DiSLN1             |
| 26995    | 260.1;376.2;450.2;464.2;638.3;1186.6             | 26947    | 1382.701   | 1382.701   | 3 | 738692    | 4168.056                | 0    | 7   | 5       | 4      | 26999    | 1186.6     | 737.7       | DiSLN1             |
| 27110    | 260.1;376.2;450.2;464.2;638.3;1186.6             | 27051    | 1600.803   | 1600.478   | 3 | 651839    | 4821.382                | 0    | 9   | 6       | 4      | 27114    | 1186.6     | 737.6       | DiSLN1             |
| 27235    | 260.1;376.2;450.2;464.2;638.3;1186.6             | 27165    | 1595.815   |            |   |           |                         |      |     |         |        |          |            |             |                    |
